# Supplementary material for: Pervasive and dynamic transcription initiation in Saccharomyces cerevisiae
Source: HighWire-hosted journal article supplement (doi:10.1101/gr.245456.118), 2019-05-10
Supplement: Supplemental_Data_S5_S8.xlsx [file Supplemental_Data_S5_S8.xlsx]

## Sheet: Data S5
Supplemental Data S5. Core promoters identified in this study.
## Column"consensus.clusters": Unique consensus cluster ID .
##Columns "chr", "start", "end" and "strands" represent the mapping pisitions of clusters in the reference genome.
##Column "gene/transcript" displays the systematic names of gene or transcript which the clusters were assigned to.
##Column "biotype" displays the features of the corresponding genes or transcripts
##Column "source" provides the reference database or articles of the corresponding genes or transcripts
##Column "type" displays the core promoter type of the clusters. "inducible" represents inducible core promoters; "constitutive" represents constitutive core promoter.
##Coulmns "Arrest.tpm","YPD.tpm","DD.tpm","DSA.tpm","Gal.tpm","Glc.tpm","H2O2.tpm","HS.tpm" and "NaCl.tpm" display the transcription abundance in TPM (tags per million) of each cluster under Arrest, YPD, DD, DSA, Gal, Glc, H2O2, HS and NaCl conditions, respectively.
##Coulmns "Arrest.PSS","YPD.PSS","DD.PSS","DSA.PSS","Gal.PSS","Glc.PSS","H2O2.PSS","HS.PSS" and "NaCl.PSS" display the Promoter Shape Score (PSS) of the clusters under Arrest, YPD, DD, DSA, Gal, Glc, H2O2, HS and NaCl condition, respectively.
## Detailed description of growth conditions is provided in Table 1 .
consensus.cluster	chr	start	end	strand	gene/transcript	biotype	source	type	Arrest.tpm	YPD.tpm	DD.tpm	DSA.tpm	Gal.tpm	Glc.tpm	H2O2.tpm	HS.tpm	NaCl.tpm	Arrest.pss	YPD.pss	DD.pss	DSA.pss	Gal.pss	Glc.pss	H2O2.pss	HS.pss	NaCl.pss
1	chrI	6529	6572	+	NA	NA	NA	NA	NA	0.564518	0.31733	0.692362	0.373718	0.43184	NA	0.890871	1.01882	NA	-3.53201	-3.42161	-5.44502	-1.83659	-1.83659	NA	-8.25349	-6.41096
2	chrI	7095	7105	+	NA	NA	NA	NA	NA	NA	NA	0.358118	NA	NA	NA	NA	0.203763	NA	NA	NA	-2.57667	NA	NA	NA	NA	-2.32193
3	chrI	8071	8087	+	NA	NA	NA	NA	NA	NA	NA	0.931108	NA	NA	NA	1.07647	NA	NA	NA	NA	-5.80588	NA	NA	NA	-6.20567	NA
4	chrI	9321	9368	+	YAL066W	mRNA	SGD	inducible	NA	NA	NA	0.907233	NA	NA	NA	0.742393	NA	NA	NA	NA	-12.4653	NA	NA	NA	-5.22745	NA
5	chrI	11272	11401	+	YAL064W-B	mRNA	SGD	constitutive	4.45629	2.60753	5.03761	21.0096	2.59111	9.42851	4.06378	13.8456	2.47063	-9.79714	-7.21147	-9.81686	-9.55727	-10.101	-10.6025	-7.57602	-9.33853	-10.4154
6	chrI	11714	11720	+	YAL064W-B	mRNA	SGD	inducible	NA	NA	NA	NA	NA	NA	NA	0.371196	NA	NA	NA	NA	NA	NA	NA	NA	-2.2781	NA
7	chrI	11906	11916	+	YAL064W-B	mRNA	SGD	inducible	NA	NA	NA	0.334244	NA	NA	NA	NA	NA	NA	NA	NA	-3.12356	NA	NA	NA	NA	NA
8	chrI	12533	12873	+	NA	NA	NA	NA	6.39306	3.62904	13.5262	12.9639	3.38838	17.9693	4.62819	24.0164	4.32997	-26.429	-22.261	-30.1618	-26.7844	-22.8138	-25.0997	-26.4316	-32.5994	-25.6393
9	chrI	12926	12949	+	NA	NA	NA	NA	0.342792	0.403227	0.475995	0.692362	NA	1.05561	0.413903	1.00223	0.331115	-1.48046	-5.79339	-2.09712	-4.54417	NA	-3.36068	-2.4445	-7.22269	-1.52352
10	chrI	16974	17037	+	NA	NA	NA	NA	1.76538	0.994626	1.07099	3.27081	NA	0.311884	1.24171	2.56125	0.713171	-9.9146	-7.76713	-8.2812	-13.6637	NA	-4.22978	-9.1252	-15.7895	-7.751
11	chrI	18001	18055	+	NA	NA	NA	NA	NA	NA	1.03132	8.28447	1.09624	3.86257	0.338648	4.45436	1.47728	NA	NA	-3.82095	-12.9313	-14.5317	-11.2485	-2.97323	-11.4682	-15.8046
12	chrI	21241	21297	+	YAL064W	mRNA	SGD	inducible	NA	NA	NA	1.28923	NA	NA	NA	NA	NA	NA	NA	NA	-7.53828	NA	NA	NA	NA	NA
13	chrI	23371	23403	+	NA	NA	NA	NA	NA	NA	NA	0.429742	0.523206	NA	0.338648	1.03935	0.382056	NA	NA	NA	-4.28336	-3.96881	NA	-3.96881	-6.89392	-3.96881
14	chrI	23755	23780	+	NA	NA	NA	NA	0.41135	0.2957	0.872657	2.17259	NA	1.58341	0.489158	2.22718	NA	-2.57798	-2.6548	-7.97713	-9.27735	NA	-8.05747	-4.84093	-5.19396	NA
15	chrI	24338	24351	+	NA	NA	NA	NA	0.479908	NA	NA	0.787861	NA	NA	NA	NA	NA	-5.77287	NA	NA	-5.55588	NA	NA	NA	NA	NA
16	chrI	24617	24639	+	1F-11	XUT	Van_Dijk_2011	NA	0.308512	NA	0.475995	NA	NA	NA	NA	0.334077	NA	-4.28336	NA	-2.75489	NA	NA	NA	NA	-1.45546	NA
17	chrI	24778	24930	+	1F-12	XUT	Van_Dijk_2011	NA	4.42201	2.55377	6.98126	14.6112	3.23889	5.68589	4.92921	9.79958	4.27903	-19.7491	-5.00078	-22.0012	-16.0005	-11.7816	-22.5055	-16.3418	-20.4863	-19.8377
18	chrI	24982	25124	+	1F-12	XUT	Van_Dijk_2011	NA	3.3765	2.17742	6.82259	14.277	1.3703	3.98252	5.75701	13.7714	1.91028	-20.8461	-17.4432	-20.7909	-23.2818	-14.4273	-22.986	-18.4533	-18.2153	-19.0195
19	chrI	25778	25796	+	NA	NA	NA	NA	NA	NA	0.277664	NA	NA	0.407849	NA	NA	NA	NA	NA	-3.84918	NA	NA	-6.58791	NA	NA	NA
20	chrI	28922	28942	+	NA	NA	NA	NA	NA	NA	NA	NA	NA	NA	0.338648	NA	NA	NA	NA	NA	NA	NA	NA	-4.28336	NA	NA
21	chrI	29103	29109	+	NA	NA	NA	NA	NA	NA	NA	NA	NA	NA	1.01594	NA	NA	NA	NA	NA	NA	NA	NA	-2.45819	NA	NA
22	chrI	30008	30057	+	1F-15	XUT	Van_Dijk_2011	NA	0.257094	NA	NA	NA	NA	NA	NA	NA	0.356586	-3.31127	NA	NA	NA	NA	NA	NA	NA	-7.63974
23	chrI	30112	30129	+	CUT001	CUT	Xu_2009	NA	NA	0.994626	NA	NA	0.672693	0.983635	NA	1.67038	0.66223	NA	-4.47455	NA	NA	-2.29261	-2.13619	NA	-2.96036	-2.53197
24	chrI	31065	31377	+	YAL062W	mRNA	SGD	constitutive	9.22109	30.9678	24.8311	56.344	124.872	55.3235	64.757	46.2511	50.8644	-14.5571	-15.5416	-14.7584	-21.6244	-17.0133	-15.0329	-14.5524	-17.0278	-20.764
25	chrI	31418	31639	+	YAL062W	mRNA	SGD	constitutive	1.59398	2.25807	8.72657	195.891	32.7875	4.43835	20.7328	11.1359	5.85819	-4.69041	-11.3663	-13.3789	-6.95569	-15.4757	-13.7632	-13.7412	-15.3017	-14.1103
26	chrI	31689	32037	+	NA	NA	NA	NA	1.93677	3.65592	11.1462	55.4367	30.5452	10.4121	14.3737	18.3371	11.9456	-21.0486	-25.0653	-25.4794	-36.5878	-28.2229	-21.5841	-29.631	-30.2876	-29.7047
27	chrI	32090	32157	+	NA	NA	NA	NA	NA	NA	0.436329	2.57845	0.398633	NA	0.30102	NA	NA	NA	NA	-7.56016	-18.9453	-10.7524	NA	-8.80382	NA	NA
28	chrI	32202	32219	+	NA	NA	NA	NA	NA	NA	NA	0.358118	NA	NA	NA	NA	NA	NA	NA	NA	-3.7535	NA	NA	NA	NA	NA
29	chrI	32320	32343	+	NA	NA	NA	NA	NA	NA	NA	2.10096	0.597949	NA	NA	NA	NA	NA	NA	NA	-8.96122	-5.97117	NA	NA	NA	NA
30	chrI	32399	32609	+	NA	NA	NA	NA	NA	NA	0.475995	8.97683	0.747436	NA	0.865434	1.07647	0.63676	NA	NA	-17.0571	-30.2845	-20.8761	NA	-22.3283	-23.4606	-16.2558
31	chrI	32656	32700	+	NA	NA	NA	NA	0.428489	0.45699	1.22965	9.5737	0.398633	1.72736	1.0912	2.37566	0.560349	-3.42341	-6.26261	-2.35884	-16.3701	-10.8929	-11.1975	-11.8986	-9.06107	-5.84867
32	chrI	33086	33088	+	YAL061W	mRNA	SGD	inducible	NA	NA	NA	NA	NA	NA	NA	NA	0.203763	NA	NA	NA	NA	NA	NA	NA	NA	-1
34	chrI	33280	33472	+	YAL061W	mRNA	SGD	constitutive	29.1544	132.635	131.771	246.29	641.724	242.478	169.136	190.646	417.409	-5.87894	-4.04234	-3.82754	-6.41258	-4.31239	-3.3051	-3.48577	-8.00528	-5.99881
35	chrI	33537	33580	+	NA	NA	NA	NA	NA	NA	NA	NA	0.373718	NA	NA	0.668153	0.585819	NA	NA	NA	NA	-3.05051	NA	NA	-8.96216	-8.44139
36	chrI	33655	34599	+	NA	NA	NA	NA	15.4428	33.1721	80.4035	111.136	238.083	123.026	72.734	62.9178	306.281	-43.8763	-44.361	-48.4427	-48.9719	-52.5775	-48.1823	-48.8082	-50.3692	-51.0661
37	chrI	34663	34690	+	YAL060W	mRNA	SGD	inducible	NA	0.564518	NA	NA	2.41671	0.767715	0.376275	NA	4.8139	NA	-8.30923	NA	NA	-0.539936	-0.757878	-6.67328	NA	0
38	chrI	34834	34911	+	YAL060W	mRNA	SGD	inducible	NA	0.322581	NA	NA	0.323889	NA	NA	NA	0.967875	NA	-4.23492	NA	NA	-0.961237	NA	NA	NA	-14.6944
39	chrI	34976	34987	+	YAL060W	mRNA	SGD	inducible	NA	0.241936	NA	0.429742	NA	NA	NA	NA	NA	NA	-3.42856	NA	-2.23852	NA	NA	NA	NA	NA
40	chrI	35015	35473	+	YAL060W	mRNA	SGD	constitutive	40.9293	72.9303	70.1299	108.725	185.613	43.6158	103.099	66.7411	71.9539	-21.5446	-20.1855	-12.5957	-19.0208	-16.4984	-13.5963	-11.3466	-18.772	-19.6682
41	chrI	35513	35935	+	NA	NA	NA	NA	26.6863	24.8925	36.8103	52.3569	79.8013	25.8384	51.2863	27.6912	62.5808	-26.8887	-23.5285	-27.7494	-30.6988	-32.2806	-26.7877	-28.8888	-32.1982	-26.9691
42	chrI	36007	36009	+	NA	NA	NA	NA	NA	NA	NA	NA	0.622864	NA	0.413903	NA	0.432997	NA	NA	NA	NA	-0.998846	NA	-0.94566	NA	-0.873981
43	chrI	36462	36780	+	YAL059W	mRNA	SGD	constitutive	33.7307	62.9572	20.3884	14.3009	21.2521	17.4175	51.8884	21.7892	30.0805	-19.1891	-13.5508	-20.0401	-17.9612	-18.5182	-18.4074	-15.2981	-21.1371	-21.8988
44	chrI	37337	37551	+	YAL058W	mRNA	SGD	constitutive	9.701	7.41937	10.2736	8.85746	6.55253	11.8516	8.42857	12.3237	5.75631	-8.2039	-9.20616	-3.05498	-9.74949	-11.9355	-3.61098	-8.53507	-10.7909	-13.162
45	chrI	37605	37632	+	NA	NA	NA	NA	NA	NA	NA	NA	NA	NA	NA	0.853751	NA	NA	NA	NA	NA	NA	NA	NA	-8.68342	NA
46	chrI	37914	37927	+	NA	NA	NA	NA	NA	NA	0.63466	0.549115	NA	0.575787	NA	0.445436	0.356586	NA	NA	-4.08278	-4.29806	NA	-3.03131	NA	-2.09712	-5.58056
47	chrI	38124	38133	+	NA	NA	NA	NA	NA	NA	NA	0.334244	NA	NA	NA	NA	0.280174	NA	NA	NA	-2.98064	NA	NA	NA	NA	-2.99767
48	chrI	38404	38424	+	NA	NA	NA	NA	NA	NA	0.237997	NA	NA	0.335876	NA	0.259837	NA	NA	NA	-1	NA	NA	-4.25809	NA	-0.985228	NA
49	chrI	38563	38565	+	NA	NA	NA	NA	0.874118	0.45699	0.753658	NA	NA	0.479822	0.30102	0.296957	0.585819	-0.626751	-0.997503	-0.899744	NA	NA	-0.970951	-0.954434	-0.954434	-0.886541
50	chrI	39162	39286	+	YAL056W	mRNA	SGD	constitutive	30.1828	31.8818	49.6621	108.223	87.774	68.7585	60.0536	109.206	54.8123	-19.7341	-19.2278	-21.1201	-21.817	-19.0998	-21.8041	-20.5716	-21.2382	-18.1622
51	chrI	39343	39421	+	NA	NA	NA	NA	0.377071	NA	1.38832	3.43794	0.54812	2.08723	1.69324	1.67038	1.19711	-7.90749	NA	-8.69997	-8.81191	-6.85398	-9.31205	-11.5488	-10.8947	-9.21223
52	chrI	39472	39561	+	NA	NA	NA	NA	NA	NA	NA	1.05048	0.423547	0.575787	0.376275	1.8931	NA	NA	NA	NA	-13.7884	-0.873981	-12.4974	-6.13753	-15.7871	NA
53	chrI	39815	39835	+	NA	NA	NA	NA	NA	NA	NA	NA	NA	NA	NA	NA	0.305645	NA	NA	NA	NA	NA	NA	NA	NA	-3.96881
54	chrI	40017	40032	+	NA	NA	NA	NA	NA	NA	0.396662	0.501366	0.54812	0.671751	NA	0.779512	NA	NA	NA	-0.881291	-0.791858	-0.902393	-0.676942	NA	-5.66036	NA
55	chrI	40092	40094	+	NA	NA	NA	NA	NA	NA	NA	0.310369	NA	NA	0.30102	NA	0.280174	NA	NA	NA	-0.995727	NA	NA	-1	NA	-0.94566
56	chrI	40147	40335	+	NA	NA	NA	NA	0.702723	0.268818	1.26932	3.9393	1.39521	1.77534	1.01594	1.55902	1.14617	-11.9015	-1	-1.5428	-21.0015	-0.991703	-14.1745	-13.5659	-15.5347	-9.52461
57	chrI	40405	40422	+	NA	NA	NA	NA	NA	NA	NA	0.453617	NA	NA	NA	0.334077	NA	NA	NA	NA	-2.9808	NA	NA	NA	-4.05099	NA
58	chrI	40475	40486	+	NA	NA	NA	NA	NA	NA	NA	0.26262	NA	NA	NA	NA	NA	NA	NA	NA	-3.43878	NA	NA	NA	NA	NA
59	chrI	40707	40710	+	NA	NA	NA	NA	NA	NA	NA	NA	NA	NA	NA	0.259837	NA	NA	NA	NA	NA	NA	NA	NA	-1.56155	NA
60	chrI	40974	40993	+	NA	NA	NA	NA	NA	NA	0.277664	NA	NA	NA	NA	NA	0.254704	NA	NA	-4.18518	NA	NA	NA	NA	NA	-4.24793
61	chrI	41069	41105	+	NA	NA	NA	NA	NA	NA	NA	NA	0.597949	NA	NA	NA	NA	NA	NA	NA	NA	-7.83582	NA	NA	NA	NA
62	chrI	41167	41199	+	NA	NA	NA	NA	NA	NA	NA	NA	0.27406	NA	NA	0.445436	1.06976	NA	NA	NA	NA	-5.61479	NA	NA	-3.24511	-6.85475
63	chrI	41282	41295	+	NA	NA	NA	NA	NA	NA	NA	NA	0.448462	NA	NA	0.593914	NA	NA	NA	NA	NA	-2.91093	NA	NA	-5.00669	NA
64	chrI	41347	41390	+	NA	NA	NA	NA	0.497048	0.672045	0.793325	NA	1.46996	1.10359	0.451531	1.03935	1.40087	-1.5836	-1.56846	-7.03154	NA	-11.4519	-7.54074	-1.45546	-10.0111	-10.6301
65	chrI	41476	41484	+	NA	NA	NA	NA	NA	NA	NA	NA	NA	NA	NA	0.222718	0.254704	NA	NA	NA	NA	NA	NA	NA	-3	-3
66	chrI	42118	42249	+	YAL055W	mRNA	SGD	constitutive	28.2289	29.9463	16.9771	31.8009	31.6913	15.5942	18.0989	17.5576	34.3596	-22.0812	-17.5445	-19.6975	-18.4238	-19.6084	-18.9778	-19.6451	-19.598	-21.551
67	chrI	42279	42433	+	NA	NA	NA	NA	10.3694	3.38711	9.71823	10.1706	7.77334	5.99778	7.75127	9.24279	12.6588	-17.2275	-20.2765	-21.9079	-18.3839	-18.238	-12.3631	-21.6457	-22.6612	-17.3045
68	chrI	42485	42487	+	NA	NA	NA	NA	NA	NA	NA	NA	NA	NA	NA	NA	0.458467	NA	NA	NA	NA	NA	NA	NA	NA	-0.852405
69	chrI	43124	43135	+	1F-23	XUT	Van_Dijk_2011	NA	NA	NA	0.277664	0.429742	NA	NA	NA	NA	NA	NA	NA	-2.54678	-4.34194	NA	NA	NA	NA	NA
70	chrI	43201	43205	+	1F-23	XUT	Van_Dijk_2011	NA	NA	NA	NA	NA	NA	0.407849	NA	NA	NA	NA	NA	NA	NA	NA	-1.87333	NA	NA	NA
71	chrI	43434	43540	+	1F-23	XUT	Van_Dijk_2011	NA	1.93677	3.06452	2.85597	6.11189	3.13923	4.53432	3.61224	5.12251	3.36209	-14.0083	-12.8274	-23.6664	-24.8657	-17.9306	-22.6632	-23.9272	-27.1136	-21.639
72	chrI	43688	43715	+	1F-23	XUT	Van_Dijk_2011	NA	0.548466	NA	0.237997	NA	NA	NA	NA	0.334077	NA	-5.99627	NA	-3.16993	NA	NA	NA	NA	-5.26513	NA
73	chrI	43772	43798	+	1F-23	XUT	Van_Dijk_2011	NA	NA	0.268818	NA	1.76672	NA	0.503813	NA	2.22718	NA	NA	-2.58496	NA	-0.995253	NA	-0.985228	NA	-0.846433	NA
74	chrI	45667	46002	+	YAL053W	mRNA	SGD	constitutive	245.113	213.656	98.8879	144.441	201.11	126.457	85.264	181.849	127.352	-30.0842	-29.7474	-26.4144	-30.1077	-28.7862	-23.735	-25.3437	-26.9346	-30.394
75	chrI	46057	46158	+	NA	NA	NA	NA	3.13654	0.645163	0.555327	2.43521	1.39521	0.767715	1.39222	4.1574	0.942405	-14.1371	-4.84718	-5.1711	-14.1991	-15.8905	-7.10158	-14.062	-18.8908	-10.1283
76	chrI	46214	46247	+	NA	NA	NA	NA	2.00533	NA	NA	NA	NA	NA	NA	NA	1.04429	-3.96602	NA	NA	NA	NA	NA	NA	NA	-2.47985
77	chrI	46414	46426	+	NA	NA	NA	NA	NA	NA	NA	NA	NA	NA	NA	0.296957	NA	NA	NA	NA	NA	NA	NA	NA	-3.42161	NA
78	chrI	46491	46516	+	NA	NA	NA	NA	NA	NA	NA	NA	NA	NA	NA	0.668153	NA	NA	NA	NA	NA	NA	NA	NA	-8.65534	NA
79	chrI	46606	46656	+	NA	NA	NA	NA	1.14835	0.215054	0.277664	NA	NA	NA	NA	0.96511	0.229234	-15.5901	-4.32193	-3.1231	NA	NA	NA	NA	-7.97035	-2.97323
80	chrI	46731	46749	+	NA	NA	NA	NA	NA	NA	NA	0.787861	NA	NA	NA	0.96511	NA	NA	NA	NA	-6.38011	NA	NA	NA	-9.06491	NA
81	chrI	46826	46831	+	NA	NA	NA	NA	NA	NA	NA	NA	NA	NA	NA	0.259837	NA	NA	NA	NA	NA	NA	NA	NA	-2.28763	NA
82	chrI	46888	46961	+	NA	NA	NA	NA	0.754141	NA	NA	NA	0.398633	NA	NA	0.259837	0.280174	-15.7823	NA	NA	NA	-9.04387	NA	NA	-11.9266	-8.54569
83	chrI	47087	47090	+	NA	NA	NA	NA	0.771281	0.430109	NA	NA	NA	NA	0.338648	NA	0.432997	-1.41767	-1.42019	NA	NA	NA	NA	-1.45546	NA	-1.38523
84	chrI	47382	47384	+	NA	NA	NA	NA	0.445629	NA	0.356996	NA	NA	NA	NA	NA	0.280174	-0.77935	NA	-0.991076	NA	NA	NA	NA	NA	-0.94566
85	chrI	47621	47719	+	NA	NA	NA	NA	6.29022	3.38711	2.8163	NA	3.9365	2.1592	1.16645	3.08093	3.15833	-11.9389	-9.84826	-9.26941	NA	-12.3707	-10.9606	-9.71549	-12.8584	-11.6495
86	chrI	47876	47893	+	NA	NA	NA	NA	0.359931	NA	NA	NA	NA	NA	NA	0.334077	NA	-1.83659	NA	NA	NA	NA	NA	NA	-6.47848	NA
87	chrI	48005	48096	+	NA	NA	NA	NA	5.60464	2.79571	2.49897	NA	5.45629	2.11122	1.76849	3.08093	2.57251	-13.8527	-16.797	-12.4328	NA	-7.70931	-9.45778	-12.3823	-11.8757	-10.6921
88	chrI	48437	49087	+	YAL051W	mRNA	SGD	constitutive	16.9168	21.4517	37.0086	67.8038	36.45	39.1055	32.7736	50.3713	51.221	-37.6845	-29.4007	-37.4195	-36.0236	-32.0943	-36.9615	-34.4441	-40.754	-41.2695
89	chrI	49502	49523	+	NA	NA	NA	NA	NA	NA	0.555327	NA	0.348804	0.263902	NA	0.705273	0.687701	NA	NA	-4.39232	NA	-4.13003	-4.3661	NA	-0.949452	-6.49375
90	chrI	50004	50008	+	NA	NA	NA	NA	NA	NA	0.475995	NA	NA	0.407849	NA	0.890871	0.66223	NA	NA	-1.55306	NA	NA	-1.48458	NA	-2.79307	-2.83911
91	chrI	52837	52853	+	NA	NA	NA	NA	NA	NA	0.31733	NA	0.54812	NA	NA	1.26207	0.280174	NA	NA	-3.16993	NA	-2.6797	NA	NA	-6.34771	-3.60046
92	chrI	54180	54214	+	YAL047W-A	mRNA	SGD	inducible	NA	NA	NA	NA	NA	NA	NA	NA	0.891464	NA	NA	NA	NA	NA	NA	NA	NA	-9.6825
93	chrI	56554	56568	+	YAL044W-A	mRNA	SGD	inducible	NA	0.215054	NA	NA	NA	NA	NA	0.334077	NA	NA	-2.80735	NA	NA	NA	NA	NA	-2.97323	NA
94	chrI	56687	56693	+	YAL044W-A	mRNA	SGD	inducible	NA	0.349463	NA	NA	NA	NA	NA	NA	NA	NA	-2.30189	NA	NA	NA	NA	NA	NA	NA
95	chrI	56948	56984	+	YAL044W-A	mRNA	SGD	inducible	NA	0.241936	0.396662	0.763986	0.448462	0.383858	NA	0.668153	1.8084	NA	-3.55297	-2.2781	-2.31623	-2.37376	-2.31623	NA	-2.37376	-6.72408
96	chrI	57424	57436	+	YAL044W-A	mRNA	SGD	inducible	0.428489	NA	NA	NA	0.398633	NA	NA	0.927991	0.305645	-2.91285	NA	NA	NA	-3.42161	NA	NA	-8.24071	-3.51279
97	chrI	57456	57609	+	YAL044W-A	mRNA	SGD	constitutive	296.206	148.925	215.626	229.005	147.693	172.952	185.654	212.027	115.585	-12.155	-13.1915	-12.5315	-9.07502	-12.9495	-10.5861	-16.1469	-11.0357	-15.8828
98	chrI	57668	57725	+	NA	NA	NA	NA	NA	NA	NA	NA	NA	NA	0.677296	NA	NA	NA	NA	NA	NA	NA	NA	-11.6137	NA	NA
100	chrI	61260	62019	+	YAL042W	mRNA	SGD	constitutive	142.121	126.828	177.11	125.747	100.904	192.936	145.318	124.982	158.273	-40.176	-31.9169	-40.5774	-41.033	-36.0518	-40.8809	-37.9509	-42.9142	-43.2102
101	chrI	62069	62187	+	NA	NA	NA	NA	2.60522	2.0699	3.64929	3.46181	1.14607	3.7666	2.5963	4.78843	8.04864	-7.31977	-14.3966	-12.0455	-18.4467	-1.86422	-9.59924	-15.1281	-21.268	-22.7043
102	chrI	62293	62298	+	NA	NA	NA	NA	NA	NA	NA	NA	NA	NA	NA	0.334077	0.305645	NA	NA	NA	NA	NA	NA	NA	-2.30121	-2.13222
103	chrI	62677	62680	+	YAL041W	mRNA	SGD	inducible	NA	NA	NA	NA	NA	NA	NA	0.259837	NA	NA	NA	NA	NA	NA	NA	NA	-1.56155	NA
104	chrI	62747	62845	+	YAL041W	mRNA	SGD	constitutive	29.2915	21.9624	47.6788	46.7703	36.7739	43.9037	38.493	57.721	47.2221	-12.8393	-14.9946	-13.2019	-12.0717	-13.821	-12.6849	-14.1956	-12.445	-14.8856
105	chrI	62919	63207	+	NA	NA	NA	NA	2.84517	0.725808	4.32362	4.82266	1.94333	3.91055	2.5963	7.64664	4.68655	-21.1448	-20.2983	-28.8371	-23.1625	-15.7751	-23.8049	-24.9367	-27.7178	-27.0328
106	chrI	63485	63507	+	NA	NA	NA	NA	0.359931	NA	0.793325	0.596864	0.27406	0.43184	0.413903	1.15071	0.458467	-4.25809	NA	-6.50059	-6.76116	-1.5755	-4.28336	-4.08708	-6.73172	-7.00818
107	chrI	64003	64079	+	NA	NA	NA	NA	0.257094	NA	2.45931	NA	NA	1.29552	NA	0.853751	1.91028	-9.73384	NA	-11.9301	NA	NA	-12.9025	NA	-11.923	-12.7375
108	chrI	64265	64311	+	NA	NA	NA	NA	0.565606	NA	2.18164	NA	NA	0.407849	0.526786	2.78397	1.57916	-6.83276	NA	-6.91533	NA	NA	-5.71435	-6.94219	-7.30116	-5.54882
109	chrI	64360	64415	+	NA	NA	NA	NA	NA	NA	0.356996	NA	NA	1.17556	NA	1.63326	0.63676	NA	NA	-8.3908	NA	NA	-10.855	NA	-7.33518	-0.63431
110	chrI	64521	64523	+	NA	NA	NA	NA	NA	NA	0.436329	NA	NA	NA	NA	0.445436	NA	NA	NA	-0.99403	NA	NA	NA	NA	-1	NA
111	chrI	64576	64580	+	NA	NA	NA	NA	0.497048	0.2957	1.70565	NA	NA	0.503813	0.526786	1.29919	0.815053	-1.47301	-0.94566	-1.1603	NA	NA	-0.791858	-2.98523	-2.52696	-1.28585
112	chrI	64651	64770	+	NA	NA	NA	NA	NA	NA	2.10231	NA	NA	0.791707	NA	2.0787	0.687701	NA	NA	-15.2961	NA	NA	-9.9621	NA	-13.7547	-7.67124
113	chrI	68182	68195	+	NA	NA	NA	NA	NA	NA	NA	NA	NA	0.287893	NA	NA	0.203763	NA	NA	NA	NA	NA	-3.62595	NA	NA	-3.70044
114	chrI	68691	68747	+	1F-32	XUT	Van_Dijk_2011	NA	2.19387	2.15054	0.594994	7.78311	1.3703	5.42199	1.5051	3.26653	2.87815	-13.0985	-12.6501	-9.58478	-12.976	-4.36064	-16.458	-12.9233	-14.2988	-14.8119
115	chrI	68930	69021	+	1F-32	XUT	Van_Dijk_2011	NA	NA	0.241936	NA	1.64734	NA	0.311884	NA	NA	NA	NA	-4.05099	NA	-17.6072	NA	-4.07	NA	NA	NA
116	chrI	69937	70160	+	NA	NA	NA	NA	NA	1.04839	3.72863	11.412	6.15389	3.07086	3.98852	7.31257	4.66108	NA	-20.574	-21.5488	-28.2872	-22.5263	-18.3582	-23.6632	-25.4938	-28.7089
117	chrI	70203	70339	+	NA	NA	NA	NA	2.3824	0.403227	1.58665	2.33971	2.3918	0.791707	2.03189	4.45436	2.62345	-10.7888	-2.25448	-14.6488	-12.8906	-7.48132	-2.28333	-13.6274	-14.8031	-6.15931
118	chrI	70403	70438	+	NA	NA	NA	NA	2.98229	NA	NA	NA	0.54812	NA	NA	0.927991	NA	-6.83152	NA	NA	NA	-2.1852	NA	NA	-6.16075	NA
119	chrI	70501	70603	+	NA	NA	NA	NA	2.27956	NA	NA	1.36085	2.44163	0.43184	1.54273	2.63549	NA	-16.131	NA	NA	-16.3579	-11.9723	-2.20344	-8.97523	-17.7171	NA
120	chrI	70688	70689	+	NA	NA	NA	NA	1.62826	2.09678	5.43427	4.75104	1.79385	5.03813	5.41837	4.04604	2.19045	0	0	0	0	0	0	0	0	0
121	chrI	70745	70747	+	NA	NA	NA	NA	0.359931	NA	NA	0.26262	NA	NA	0.338648	0.296957	NA	-0.985228	NA	NA	-0.99403	NA	NA	-0.991076	-1	NA
122	chrI	71458	71479	+	YAL038W	mRNA	SGD	inducible	NA	NA	NA	0.334244	NA	0.239911	NA	NA	2.19045	NA	NA	NA	-3.40833	NA	-2.80735	NA	NA	-9.32335
126	chrI	71634	73076	+	YAL038W	mRNA	SGD	constitutive	4990.67	6810.72	16982.5	13217.8	5291.65	16783	13577.5	13657.1	7095.52	-10.764	-0.656377	-0.724212	0	-0.567707	-4.45028	-4.09134	-0.535941	-4.5517
127	chrI	73417	73486	+	YAL037W	mRNA	SGD	constitutive	1.54256	1.88173	0.991656	1.88609	2.71569	15.3063	1.12883	7.31257	1.73199	-18.3842	-18.7803	-13.1544	-13.7676	-19.9566	-20.0418	-14.8536	-21.2408	-17.043
128	chrI	73656	73674	+	YAL037W	mRNA	SGD	inducible	0.582746	NA	NA	0.501366	NA	NA	NA	0.222718	NA	-8.22796	NA	NA	-3.69438	NA	NA	NA	-3.70044	NA
129	chrI	73809	74043	+	YAL037W	mRNA	SGD	constitutive	17.2253	8.33335	9.6389	13.0833	7.52419	9.86035	6.47194	20.8612	2.7508	-28.5981	-16.8803	-22.3641	-23.3907	-17.7718	-14.6425	-14.7555	-23.0095	-19.1125
130	chrI	74725	74745	+	NA	NA	NA	NA	NA	NA	NA	1.33698	NA	NA	NA	1.93022	0.407526	NA	NA	NA	-1.90156	NA	NA	NA	-1.37382	-2.67943
132	chrI	76337	77472	+	YAL035W	mRNA	SGD	constitutive	671.58	854.169	1880.85	577.884	248.797	1589.17	958.11	1000.6	739.38	-32.7245	-29.3507	-34.8942	-32.8858	-28.5374	-33.9061	-31.2531	-35.6363	-31.349
133	chrI	77493	77590	+	NA	NA	NA	NA	0.514187	0.376345	1.98331	0.644613	NA	1.41548	1.84375	1.26207	0.63676	-3.0667	-3.66647	-17.6043	-11.261	NA	-12.5011	-20.7547	-17.4432	-5.20108
134	chrI	77724	77758	+	NA	NA	NA	NA	NA	NA	1.11065	NA	NA	0.671751	1.05357	NA	NA	NA	NA	-12.9407	NA	NA	-5.6116	-10.9639	NA	NA
135	chrI	77838	77842	+	NA	NA	NA	NA	NA	NA	0.237997	NA	NA	NA	NA	NA	NA	NA	NA	-2	NA	NA	NA	NA	NA	NA
136	chrI	78230	78240	+	NA	NA	NA	NA	NA	0.322581	0.515661	NA	NA	NA	NA	0.296957	0.280174	NA	-0.979869	-0.77935	NA	NA	NA	NA	-2.8633	-1.49884
137	chrI	78337	78403	+	NA	NA	NA	NA	NA	1.07527	1.18999	NA	NA	2.03924	0.903061	0.779512	NA	NA	-0.721928	-10.0867	NA	NA	-6.59897	-0.811278	-10.5554	NA
138	chrI	78548	78552	+	NA	NA	NA	NA	NA	NA	NA	NA	NA	NA	0.225765	NA	NA	NA	NA	NA	NA	NA	NA	-2	NA	NA
139	chrI	78625	78927	+	NA	NA	NA	NA	0.908397	2.6613	7.57625	NA	NA	6.35764	3.31122	4.41724	2.13951	-18.9695	-23.8958	-27.7608	NA	NA	-25.3302	-21.9161	-26.3495	-22.1773
140	chrI	79088	79107	+	NA	NA	NA	NA	0.222814	0.322581	0.991656	NA	NA	1.0796	0.602041	0.519675	NA	-0.995727	-0.918296	-3.51382	NA	NA	-0.894452	-6.27511	-0.940286	NA
141	chrI	79673	79718	+	YAL034W-A	mRNA	SGD	constitutive	6.94153	6.58604	8.60757	4.39292	6.87642	4.24643	5.38074	4.97403	5.37425	-10.808	-9.92282	-9.99769	-10.1075	-9.78742	-7.43218	-10.2684	-6.69812	-11.3115
142	chrI	79759	79768	+	NA	NA	NA	NA	NA	NA	0.356996	NA	NA	NA	NA	NA	0.254704	NA	NA	-3.14164	NA	NA	NA	NA	NA	-3.07784
143	chrI	79873	79878	+	NA	NA	NA	NA	NA	NA	0.396662	NA	NA	NA	NA	0.445436	NA	NA	NA	-3.1419	NA	NA	NA	NA	-1.95974	NA
144	chrI	79942	79945	+	NA	NA	NA	NA	NA	NA	NA	NA	NA	NA	NA	0.296957	NA	NA	NA	NA	NA	NA	NA	NA	-1.51274	NA
145	chrI	82211	82282	+	YAL033W	mRNA	SGD	inducible	NA	0.510754	NA	NA	2.21739	0.671751	NA	1.18783	1.29899	NA	-2.66179	NA	NA	-14.8823	-3.24772	NA	-14.2214	-16.8777
146	chrI	82661	82769	+	YAL033W	mRNA	SGD	constitutive	51.8472	94.7583	33.9543	20.8902	46.4158	30.8526	51.5121	33.6675	41.3639	-11.915	-10.8895	-9.615	-11.7982	-14.022	-11.9782	-11.1391	-11.4717	-11.8154
147	chrI	82873	82893	+	NA	NA	NA	NA	0.428489	0.241936	NA	NA	0.323889	0.263902	NA	0.222718	0.305645	-1.26011	-2.56189	NA	NA	-1.57819	-3.88357	NA	-1.58496	-1.58496
148	chrI	82945	83055	+	NA	NA	NA	NA	3.05084	3.76345	0.95199	1.05048	2.21739	1.43947	2.78444	0.890871	1.96122	-1.76648	-4.24725	-4.80611	-5.04933	-1.85163	-0.650022	-4.92669	-3.52549	-0.882959
149	chrI	83841	83952	+	YAL031W-A	mRNA	SGD	inducible	NA	NA	0.31733	1.79059	2.21739	NA	NA	1.44767	NA	NA	NA	-4.24793	-0.989588	-17.2413	NA	NA	-9.94514	NA
150	chrI	86644	86646	+	YAL030W	mRNA	SGD	inducible	NA	NA	NA	NA	NA	NA	NA	0.334077	NA	NA	NA	NA	NA	NA	NA	NA	-0.991076	NA
151	chrI	86939	86946	+	YAL030W	mRNA	SGD	inducible	NA	NA	NA	NA	NA	NA	NA	0.371196	NA	NA	NA	NA	NA	NA	NA	NA	-2.4741	NA
152	chrI	87236	87347	+	YAL030W	mRNA	SGD	constitutive	76.5968	54.3012	78.9358	72.4354	57.9762	58.1065	80.0714	60.7648	94.0622	-7.10309	-9.76601	-7.52947	-5.31189	-13.2001	-6.11743	-6.62814	-7.55814	-9.82068
153	chrI	87389	87404	+	NA	NA	NA	NA	NA	NA	NA	NA	NA	NA	NA	0.296957	NA	NA	NA	NA	NA	NA	NA	NA	-3.72887	NA
154	chrI	87501	87524	+	NA	NA	NA	NA	0.497048	NA	NA	0.453617	NA	NA	0.413903	0.222718	0.280174	-6.79711	NA	NA	-3.88863	NA	NA	-4.08708	-2	-4.08708
155	chrI	92377	92442	+	YAL028W	mRNA	SGD	inducible	0.702723	1.55914	2.61797	7.68761	1.94333	4.63028	1.80612	18.4485	NA	-8.74032	-10.4689	-7.40345	-9.47165	-7.64984	-7.87857	-6.02333	-8.42914	NA
156	chrI	92827	93102	+	YAL028W	mRNA	SGD	constitutive	11.8949	16.7474	26.8937	79.3829	41.1339	34.4752	19.4158	50.2971	40.88	-23.1012	-17.3066	-25.6773	-25.3043	-21.5966	-24.9461	-22.7952	-29.0296	-22.556
157	chrI	93165	93213	+	NA	NA	NA	NA	NA	NA	NA	0.453617	NA	0.335876	NA	0.259837	0.280174	NA	NA	NA	-10.7435	NA	-3.58	NA	-2.54678	-8.63536
158	chrI	93360	93364	+	NA	NA	NA	NA	NA	NA	NA	1.1221	NA	0.359867	NA	NA	0.585819	NA	NA	NA	-2.46052	NA	-0.970951	NA	NA	-0.965636
159	chrI	93650	93653	+	NA	NA	NA	NA	NA	NA	NA	0.549115	NA	NA	NA	NA	NA	NA	NA	NA	-1.47736	NA	NA	NA	NA	NA
160	chrI	93899	93903	+	NA	NA	NA	NA	NA	NA	NA	NA	NA	NA	NA	0.334077	0.356586	NA	NA	NA	NA	NA	NA	NA	-1.83659	-1.88057
161	chrI	94578	94730	+	YAL027W	mRNA	SGD	constitutive	23.3441	28.2259	34.9063	40.8016	44.4226	36.5624	37.5523	48.701	35.4548	-18.1826	-16.0083	-17.1745	-15.521	-18.0491	-16.4393	-18.3598	-17.1583	-16.5338
162	chrI	95040	95181	+	NA	NA	NA	NA	3.70215	2.6613	4.28395	5.10916	1.49487	4.79822	2.93495	12.1752	5.09408	-23.0379	-22.4091	-24.7338	-25.6966	-18.2483	-26.9087	-17.3551	-25.3984	-23.5918
163	chrI	99389	99428	+	HRA1	ncRNA_gene	SGD	NA	NA	NA	NA	1.4086	0.573035	0.791707	0.451531	1.67038	NA	NA	NA	NA	-9.69068	-6.41383	-5.66331	-0.979869	-9.80741	NA
164	chrI	105762	105769	+	NA	NA	NA	NA	NA	NA	NA	NA	NA	NA	NA	0.259837	NA	NA	NA	NA	NA	NA	NA	NA	-2.76589	NA
165	chrI	109338	109342	+	NA	NA	NA	NA	NA	NA	NA	NA	NA	NA	NA	0.222718	NA	NA	NA	NA	NA	NA	NA	NA	-2	NA
166	chrI	109738	109763	+	NA	NA	NA	NA	NA	NA	NA	1.5996	NA	NA	NA	0.668153	NA	NA	NA	NA	-2.54955	NA	NA	NA	-5.81239	NA
167	chrI	110655	110675	+	NA	NA	NA	NA	NA	NA	NA	0.596864	NA	NA	NA	0.408316	NA	NA	NA	NA	-6.55474	NA	NA	NA	-3.39016	NA
168	chrI	114161	114183	+	YAL019W-A	mRNA	SGD	inducible	NA	NA	NA	0.763986	NA	NA	NA	0.408316	0.789582	NA	NA	NA	-8.11836	NA	NA	NA	-1.96284	-5.99708
169	chrI	114338	114356	+	NA	NA	NA	NA	NA	NA	NA	0.716237	NA	NA	NA	NA	NA	NA	NA	NA	-3.26829	NA	NA	NA	NA	NA
170	chrI	114536	114542	+	YAL019W	mRNA	SGD	inducible	NA	NA	NA	0.477491	NA	NA	NA	NA	0.356586	NA	NA	NA	-0.881291	NA	NA	NA	NA	-2.23113
171	chrI	114782	114895	+	YAL019W	mRNA	SGD	constitutive	18.6307	30.027	53.5494	40.348	13.5286	53.6681	37.8157	55.0855	42.2809	-9.94741	-9.84366	-13.6645	-14.5888	-9.72553	-15.7633	-16.673	-15.9581	-16.1343
172	chrI	114923	114949	+	NA	NA	NA	NA	NA	NA	0.277664	NA	NA	0.407849	NA	0.593914	0.280174	NA	NA	-7.20275	NA	NA	-6.86376	NA	-7.08918	-7.08918
173	chrI	115086	115322	+	NA	NA	NA	NA	1.02837	0.510754	10.7892	3.91543	0.423547	9.47649	2.55867	9.98518	10.2646	-16.0165	-12.0913	-23.2079	-22.351	-11.5086	-24.6863	-18.6653	-28.6932	-27.7443
174	chrI	115352	115374	+	NA	NA	NA	NA	0.222814	0.215054	1.03132	NA	NA	0.527804	0.677296	0.668153	0.483937	-1.99145	-4.24793	-8.368	NA	NA	-1.89132	-8.31161	-3.90085	-1.79949
175	chrI	115504	115741	+	NA	NA	NA	NA	NA	NA	4.24429	0.238746	NA	2.20718	NA	1.03935	3.10739	NA	NA	-24.6461	-8.11661	NA	-22.4466	NA	-16.4597	-19.838
176	chrI	116005	116144	+	NA	NA	NA	NA	1.43972	2.50001	8.52824	0.572989	1.1959	6.7415	2.44579	6.86713	5.80725	-13.4425	-20.6764	-18.6981	-10.5941	-14.1097	-19.1085	-15.1744	-21.7451	-20.7526
177	chrI	116206	116273	+	NA	NA	NA	NA	NA	NA	0.832991	NA	NA	0.359867	NA	NA	0.203763	NA	NA	-13.7525	NA	NA	-8.63686	NA	NA	-8.70438
178	chrI	116440	116444	+	NA	NA	NA	NA	NA	0.241936	1.38832	NA	NA	1.10359	0.564413	0.779512	0.967875	NA	-1.98215	-1.64481	NA	NA	-2	-1.99358	-1.97046	-1.96388
179	chrI	116969	117043	+	NA	NA	NA	NA	NA	NA	NA	NA	NA	0.407849	NA	0.259837	NA	NA	NA	NA	NA	NA	-3.02348	NA	-9.15741	NA
180	chrI	118003	118005	+	NA	NA	NA	NA	NA	NA	NA	NA	NA	0.335876	NA	NA	NA	NA	NA	NA	NA	NA	-1	NA	NA	NA
181	chrI	118924	118945	+	NA	NA	NA	NA	NA	NA	NA	NA	NA	NA	NA	0.334077	NA	NA	NA	NA	NA	NA	NA	NA	-6.96166	NA
182	chrI	119825	119914	+	YAL017W	mRNA	SGD	constitutive	13.1803	24.57	44.9418	104.475	48.6581	37.666	48.3514	36.6742	56.6207	-14.7613	-15.4126	-17.1138	-19.7245	-14.7218	-17.0232	-15.7392	-18.2556	-17.8904
183	chrI	119951	120125	+	YAL017W	mRNA	SGD	constitutive	1.7311	5.29571	16.6995	32.8275	12.4822	10.3642	14.7124	15.0334	12.9135	-12.7543	-17.7971	-21.6246	-17.3424	-18.149	-20.0921	-16.8159	-23.6587	-22.8234
184	chrI	120202	120367	+	NA	NA	NA	NA	NA	0.430109	8.52824	10.2661	3.16415	4.55831	4.92921	22.8657	3.94791	NA	-8.19456	-23.9556	-26.0342	-19.2191	-21.2163	-23.3072	-26.7076	-18.4543
185	chrI	120430	120480	+	NA	NA	NA	NA	NA	NA	0.793325	0.572989	NA	NA	NA	0.334077	0.534878	NA	NA	-10.8707	-11.0535	NA	NA	NA	-8.72854	-10.5565
186	chrI	120568	120591	+	NA	NA	NA	NA	NA	NA	NA	0.286495	NA	NA	NA	0.482555	0.382056	NA	NA	NA	-4	NA	NA	NA	-6.80186	-1.45546
187	chrI	120655	120689	+	NA	NA	NA	NA	NA	NA	NA	0.405868	NA	NA	NA	0.779512	NA	NA	NA	NA	-3.57237	NA	NA	NA	-8.46807	NA
188	chrI	120766	120789	+	NA	NA	NA	NA	NA	0.268818	2.02298	1.38472	0.82218	1.29552	0.790178	1.74462	1.42634	NA	-3	-7.46303	-5.00363	-2.98209	-7.58246	-6.24345	-5.17882	-6.87569
189	chrI	120926	120928	+	NA	NA	NA	NA	NA	NA	NA	NA	NA	NA	NA	0.334077	NA	NA	NA	NA	NA	NA	NA	NA	-0.991076	NA
190	chrI	121060	121174	+	NA	NA	NA	NA	NA	NA	2.22131	0.26262	0.423547	0.599778	0.564413	1.74462	0.305645	NA	NA	-12.2068	-12.0137	-11.1511	-13.3383	-10.6252	-15.6104	-8.16108
191	chrI	121263	121294	+	NA	NA	NA	NA	NA	NA	0.31733	NA	NA	NA	0.225765	NA	NA	NA	NA	-4.125	NA	NA	NA	-3.32193	NA	NA
192	chrI	121554	121575	+	NA	NA	NA	NA	NA	NA	NA	NA	NA	NA	NA	0.222718	NA	NA	NA	NA	NA	NA	NA	NA	-4.39232	NA
193	chrI	121669	121681	+	NA	NA	NA	NA	NA	NA	NA	NA	NA	NA	NA	0.371196	NA	NA	NA	NA	NA	NA	NA	NA	-3.15939	NA
194	chrI	121776	121778	+	NA	NA	NA	NA	NA	NA	NA	NA	0.348804	NA	NA	NA	NA	NA	NA	NA	NA	-0.940286	NA	NA	NA	NA
195	chrI	121854	121891	+	NA	NA	NA	NA	NA	NA	0.594994	0.26262	NA	0.311884	0.338648	0.816632	0.407526	NA	NA	-7.00222	-3.67835	NA	-3.84495	-7.36034	-9.46975	-7.21103
196	chrI	121956	121962	+	NA	NA	NA	NA	NA	NA	NA	NA	NA	NA	NA	0.371196	NA	NA	NA	NA	NA	NA	NA	NA	-2.2781	NA
197	chrI	122083	122095	+	NA	NA	NA	NA	NA	NA	0.356996	NA	NA	NA	NA	NA	0.229234	NA	NA	-5.68203	NA	NA	NA	NA	NA	-0.991076
198	chrI	122288	122296	+	NA	NA	NA	NA	NA	NA	0.713992	NA	NA	NA	0.677296	0.296957	0.483937	NA	NA	-2.37037	NA	NA	NA	-2.37037	-2.8633	-2.32587
199	chrI	122567	122570	+	NA	NA	NA	NA	NA	NA	0.872657	NA	0.896924	0.335876	0.263393	0.408316	0.432997	NA	NA	-0.976021	NA	-2.34898	-1.56155	-0.985228	-0.845351	-0.936667
200	chrI	122747	122750	+	NA	NA	NA	NA	NA	NA	0.356996	NA	0.573035	NA	NA	0.519675	0.203763	NA	NA	-1.57082	NA	-1.5305	NA	NA	-2.50013	-1.58496
201	chrI	122835	122851	+	NA	NA	NA	NA	NA	NA	NA	NA	0.323889	NA	NA	NA	NA	NA	NA	NA	NA	-3.98291	NA	NA	NA	NA
202	chrI	122906	122909	+	NA	NA	NA	NA	NA	NA	0.31733	NA	NA	NA	NA	NA	NA	NA	NA	-1.51274	NA	NA	NA	NA	NA	NA
203	chrI	123020	123022	+	NA	NA	NA	NA	NA	NA	NA	NA	NA	NA	0.30102	NA	NA	NA	NA	NA	NA	NA	NA	-1	NA	NA
204	chrI	123316	123342	+	NA	NA	NA	NA	NA	NA	NA	NA	0.448462	NA	0.451531	0.519675	NA	NA	NA	NA	NA	-2.37376	NA	-2.53292	-9.20906	NA
205	chrI	123531	123553	+	NA	NA	NA	NA	NA	0.403227	0.872657	NA	1.07133	NA	0.865434	0.890871	1.04429	NA	-3.26866	-2.87074	NA	-6.04068	NA	-5.55228	-8.12825	-10.861
206	chrI	123635	123637	+	NA	NA	NA	NA	NA	NA	NA	NA	0.323889	NA	NA	NA	0.331115	NA	NA	NA	NA	-0.961237	NA	NA	NA	-0.961237
207	chrI	123728	123742	+	NA	NA	NA	NA	NA	NA	NA	NA	NA	NA	NA	NA	0.229234	NA	NA	NA	NA	NA	NA	NA	NA	-3.77338
208	chrI	124756	124913	+	YAL016W	mRNA	SGD	constitutive	248.181	254.033	332.601	415.847	301.516	324.072	256.432	298.59	282.467	-12.0342	-15.7095	-14.3148	-13.6388	-16.2311	-15.3353	-20.1478	-19.5074	-12.5791
209	chrI	124950	125205	+	NA	NA	NA	NA	3.58217	NA	5.63261	7.9741	2.93992	5.15809	3.91326	2.63549	5.80725	-17.7862	NA	-15.2879	-21.309	-17.2075	-17.5054	-17.6642	-16.7348	-16.6956
210	chrI	125320	125588	+	NA	NA	NA	NA	NA	NA	1.90398	1.07436	NA	0.959644	1.20408	8.57463	1.45181	NA	NA	-18.6906	-20.7205	NA	-19.759	-18.3182	-26.1299	-22.2676
211	chrI	125650	125652	+	NA	NA	NA	NA	NA	NA	NA	NA	NA	NA	NA	NA	0.254704	NA	NA	NA	NA	NA	NA	NA	NA	-0.970951
212	chrI	125757	125766	+	NA	NA	NA	NA	2.5538	1.1828	2.77664	1.3131	1.81876	3.26279	2.22003	1.07647	2.80174	-0.824841	-0.730926	-0.822404	-0.929943	-0.644694	-0.942927	-0.706274	-0.663197	-0.871869
213	chrI	125869	125917	+	NA	NA	NA	NA	1.02837	0.403227	0.872657	0.668488	0.697607	1.10359	0.564413	0.668153	1.47728	-8.19618	-6.8766	-10.0103	-0.676942	-7.65472	-8.40851	-4.30806	-3.33516	-8.33428
214	chrI	126223	126237	+	NA	NA	NA	NA	NA	NA	NA	NA	NA	NA	NA	NA	0.280174	NA	NA	NA	NA	NA	NA	NA	NA	-3.60046
215	chrI	126339	126341	+	NA	NA	NA	NA	NA	NA	NA	NA	NA	NA	NA	NA	0.432997	NA	NA	NA	NA	NA	NA	NA	NA	-0.787127
216	chrI	127836	127848	+	NA	NA	NA	NA	NA	NA	NA	NA	NA	NA	0.225765	NA	NA	NA	NA	NA	NA	NA	NA	-3.58496	NA	NA
217	chrI	128203	128208	+	NA	NA	NA	NA	NA	NA	0.237997	NA	NA	0.407849	NA	0.668153	NA	NA	NA	-2.32193	NA	NA	-1.99501	NA	-2.96136	NA
218	chrI	129193	129730	+	YAL013W	mRNA	SGD	constitutive	54.3496	47.1238	142.441	135.082	115.853	98.4115	93.4292	90.8689	159.801	-35.6118	-31.402	-42.7071	-35.216	-33.8123	-40.9402	-37.5313	-36.964	-42.9664
219	chrI	129798	129822	+	NA	NA	NA	NA	NA	NA	0.396662	NA	NA	NA	0.225765	NA	NA	NA	NA	-7.20275	NA	NA	NA	-3.80735	NA	NA
220	chrI	129902	129943	+	NA	NA	NA	NA	NA	NA	2.26098	1.16985	1.5447	1.82332	1.35459	1.26207	2.64892	NA	NA	-3.68887	-1.01765	-1.27471	-3.92599	-4.43259	-4.7373	-3.63395
222	chrI	130678	131334	+	YAL012W	mRNA	SGD	constitutive	302.376	332.823	1059.25	238.602	176.819	665.513	537.02	564.627	366.29	-10.3784	-11.9533	-8.37797	-11.3954	-17.0326	-10.9853	-12.8531	-6.94877	-17.1578
223	chrI	131387	131751	+	NA	NA	NA	NA	1.43972	0.241936	5.15661	0.310369	NA	5.30203	4.7787	1.00223	3.31115	-23.9371	-21.1153	-29.5657	-8.27219	NA	-30.2087	-29.528	-19.6042	-27.0964
224	chrI	132163	132298	+	YAL011W	mRNA	SGD	constitutive	6.73585	7.39249	17.8498	16.3541	20.704	11.8756	14.5995	16.2955	19.3575	-14.4492	-14.5302	-13.643	-11.6064	-14.7762	-13.4868	-12.8704	-11.3427	-14.7734
225	chrI	132417	132423	+	NA	NA	NA	NA	NA	NA	0.63466	NA	NA	NA	NA	NA	NA	NA	NA	-3.81855	NA	NA	NA	NA	NA	NA
226	chrI	132493	132850	+	NA	NA	NA	NA	0.325652	0.537636	10.7099	7.80698	4.31022	6.18971	3.49936	9.6511	8.04864	-20.9141	-24.1839	-38.5091	-36.1555	-31.8261	-37.3124	-31.5769	-39.7833	-38.2088
227	chrI	132925	132928	+	NA	NA	NA	NA	NA	NA	0.475995	NA	NA	0.335876	NA	0.259837	NA	NA	NA	-1.45546	NA	NA	-1.56155	NA	-1.56155	NA
228	chrI	132988	132990	+	NA	NA	NA	NA	NA	NA	NA	NA	NA	NA	NA	NA	0.331115	NA	NA	NA	NA	NA	NA	NA	NA	-0.995727
229	chrI	133094	133110	+	NA	NA	NA	NA	NA	NA	0.555327	NA	NA	NA	NA	NA	NA	NA	NA	-2.99838	NA	NA	NA	NA	NA	NA
230	chrI	133165	133423	+	NA	NA	NA	NA	NA	0.591399	2.22131	0.429742	1.76893	1.3435	NA	3.34077	1.63011	NA	-8.91072	-17.0388	-13.3005	-14.9047	-14.0989	NA	-27.392	-19.1133
231	chrI	133552	133568	+	NA	NA	NA	NA	NA	NA	NA	NA	NA	NA	0.30102	NA	NA	NA	NA	NA	NA	NA	NA	-3.81774	NA	NA
232	chrI	134505	134513	+	NA	NA	NA	NA	NA	NA	NA	NA	NA	NA	NA	0.222718	NA	NA	NA	NA	NA	NA	NA	NA	-3	NA
233	chrI	135761	135932	+	YAL009W	mRNA	SGD	constitutive	18.1165	17.4194	18.0878	17.8104	22.8716	19.3128	15.3897	24.9815	21.1914	-17.7283	-16.9601	-24.6253	-19.7387	-21.4648	-21.9316	-19.043	-22.2623	-23.1027
234	chrI	136009	136028	+	NA	NA	NA	NA	NA	NA	NA	NA	NA	0.287893	NA	NA	NA	NA	NA	NA	NA	NA	-4.16241	NA	NA	NA
235	chrI	136101	136170	+	NA	NA	NA	NA	1.83393	1.12904	1.62632	1.02661	1.99316	2.11122	1.39222	1.85598	2.41969	-13.5488	-15.3395	-16.1226	-11.6424	-16.3635	-14.1641	-13.6096	-11.3467	-13.087
236	chrI	136282	136338	+	NA	NA	NA	NA	0.565606	0.940863	0.674326	1.43247	1.04641	1.58341	0.639668	2.78397	2.19045	-7.12482	-10.3714	-8.57642	-10.2784	-10.7265	-11.7127	-7.44128	-13.2218	-10.1538
237	chrI	136476	136565	+	YAL008W	mRNA	SGD	inducible	0.257094	0.940863	NA	0.83561	0.473376	NA	NA	0.222718	2.95457	-8.74018	-7.82283	NA	-8.00512	-8.25443	NA	NA	-7.85475	-15.2893
239	chrI	136795	136994	+	YAL008W	mRNA	SGD	constitutive	133.02	88.7368	195.237	272.934	137.603	105.441	193.067	198.182	108.962	-13.9261	-12.4388	-12.4568	-11.9171	-12.3398	-12.303	-12.2527	-12.0906	-17.3061
240	chrI	137020	137350	+	NA	NA	NA	NA	19.1963	5.99464	20.1108	21.129	14.301	13.411	24.9094	19.4136	20.7329	-29.7069	-30.6827	-29.1088	-28.1045	-32.3905	-25.2917	-35.638	-31.9208	-26.4714
241	chrI	137724	137770	+	1F-60	XUT	Van_Dijk_2011	NA	0.239954	NA	NA	NA	NA	0.767715	NA	1.41055	0.585819	-4	NA	NA	NA	NA	-12.7605	NA	-14.2277	-10.0837
242	chrI	141672	141689	+	YAL003W	mRNA	SGD	inducible	NA	NA	NA	NA	NA	0.43184	NA	1.22495	NA	NA	NA	NA	NA	NA	-3.7535	NA	-6.3682	NA
243	chrI	141741	141748	+	YAL003W	mRNA	SGD	inducible	NA	NA	NA	NA	NA	NA	NA	NA	0.229234	NA	NA	NA	NA	NA	NA	NA	NA	-2.7823
244	chrI	141914	142084	+	YAL003W	mRNA	SGD	constitutive	7.38716	8.27959	4.83928	28.5062	18.5115	23.5833	5.04209	9.50263	12.455	-24.3126	-26.0792	-22.7143	-25.1096	-24.6783	-23.0754	-19.5424	-24.9979	-24.3497
246	chrI	142108	142450	+	YAL003W	mRNA	SGD	constitutive	1228.7	1086.45	982.136	828.782	412.51	1287.1	872.357	934.784	445.452	-10.0413	-8.5875	-8.1529	-7.04986	-6.48478	-6.67462	-8.67289	-6.73515	-8.70462
247	chrI	142619	143131	+	NA	NA	NA	NA	204.167	91.1024	102.656	34.9046	45.8677	162.78	106.937	97.6246	60.7724	-23.0752	-17.2572	-17.7158	-23.4651	-12.2777	-19.8443	-18.5636	-15.9155	-19.1375
248	chrI	143441	143460	+	YAL002W	mRNA	SGD	inducible	NA	NA	NA	0.405868	NA	2.30315	0.714923	1.00223	NA	NA	NA	NA	-6.65078	NA	-1.39828	-7.75169	-9.39436	NA
249	chrI	143532	143734	+	YAL002W	mRNA	SGD	constitutive	16.0084	21.371	21.0231	76.6612	28.2033	30.6127	22.4636	37.7878	25.7506	-22.6039	-21.4833	-25.8731	-28.0715	-27.3705	-29.0349	-26.4851	-28.5563	-26.0989
250	chrI	143953	144111	+	NA	NA	NA	NA	NA	NA	1.30899	3.39019	1.1959	0.983635	0.526786	3.89756	3.15833	NA	NA	-18.0653	-18.6904	-20.0306	-16.51	-6.101	-20.009	-21.5703
251	chrI	144305	144307	+	NA	NA	NA	NA	NA	NA	NA	0.668488	0.473376	NA	0.413903	0.482555	1.01882	NA	NA	NA	-0.676942	-0.949452	NA	-0.99403	-0.77935	-0.983708
252	chrI	144386	144393	+	NA	NA	NA	NA	NA	NA	NA	NA	NA	NA	0.263393	0.259837	NA	NA	NA	NA	NA	NA	NA	-0.985228	-2.76589	NA
253	chrI	144444	144491	+	NA	NA	NA	NA	NA	NA	NA	0.358118	NA	NA	NA	0.519675	NA	NA	NA	NA	-8.33877	NA	NA	NA	-7.80979	NA
254	chrI	144618	144656	+	NA	NA	NA	NA	NA	NA	NA	NA	NA	NA	NA	0.371196	0.407526	NA	NA	NA	NA	NA	NA	NA	-10.4183	-7.81418
255	chrI	145308	145322	+	NA	NA	NA	NA	NA	NA	NA	NA	NA	NA	NA	0.334077	NA	NA	NA	NA	NA	NA	NA	NA	-6.03451	NA
256	chrI	151771	151786	+	YAR002W	mRNA	SGD	inducible	NA	NA	NA	NA	NA	NA	NA	0.259837	NA	NA	NA	NA	NA	NA	NA	NA	-3.84918	NA
257	chrI	152162	152294	+	YAR002W	mRNA	SGD	constitutive	37.6385	38.6022	51.7644	35.1911	33.9087	48.1981	32.7736	36.6371	51.221	-8.97826	-7.60464	-8.3932	-7.6482	-6.61323	-8.78144	-9.01728	-7.8132	-7.03615
258	chrI	152409	152413	+	NA	NA	NA	NA	NA	NA	NA	NA	NA	NA	NA	0.222718	NA	NA	NA	NA	NA	NA	NA	NA	-2	NA
259	chrI	152474	152546	+	NA	NA	NA	NA	0.565606	0.591399	1.15032	NA	0.54812	1.03162	0.413903	0.593914	1.22258	-9.48329	-8.12481	-12.7135	NA	-8.89882	-8.23227	-8.54031	-0.696212	-12.4925
260	chrI	152677	152847	+	NA	NA	NA	NA	0.959816	NA	1.90398	0.763986	NA	1.55942	0.30102	1.26207	1.68105	-12.6934	NA	-18.9299	-15.4894	NA	-16.2864	-10.501	-20.3951	-16.6553
261	chrI	152938	152959	+	NA	NA	NA	NA	NA	NA	NA	NA	NA	NA	NA	0.259837	NA	NA	NA	NA	NA	NA	NA	NA	-4.32743	NA
262	chrI	153013	153080	+	NA	NA	NA	NA	0.719862	NA	0.594994	NA	0.27406	1.19956	NA	0.519675	1.32446	-10.5086	NA	-7.84783	NA	-0.99403	-13.521	NA	-11.288	-12.4028
263	chrI	153422	153425	+	NA	NA	NA	NA	0.308512	NA	NA	NA	NA	0.359867	0.338648	NA	0.382056	-1.57082	NA	NA	NA	NA	-1.53892	-1.45546	NA	-1.32604
264	chrI	154883	154965	+	YAR003W	mRNA	SGD	constitutive	9.76956	11.3441	6.26727	11.5314	13.1051	10.0523	9.294	9.87382	12.506	-10.9846	-11.6176	-13.4721	-13.9248	-11.0938	-12.4248	-11.21	-11.325	-15.1709
265	chrI	155020	155054	+	NA	NA	NA	NA	NA	NA	NA	NA	NA	NA	NA	1.48479	NA	NA	NA	NA	NA	NA	NA	NA	-7.72845	NA
266	chrI	155119	155131	+	NA	NA	NA	NA	NA	NA	NA	NA	NA	NA	NA	NA	0.280174	NA	NA	NA	NA	NA	NA	NA	NA	-3.56356
267	chrI	155757	155759	+	NA	NA	NA	NA	NA	NA	NA	NA	NA	0.359867	NA	NA	NA	NA	NA	NA	NA	NA	-0.996792	NA	NA	NA
268	chrI	155919	156061	+	NA	NA	NA	NA	3.08512	2.12366	0.515661	0.381993	1.46996	1.48745	1.20408	1.07647	4.38091	-19.4493	-15.5103	-15.3692	-13.7516	-14.8207	-19.7147	-11.5493	-15.7268	-20.5657
269	chrI	158820	158907	+	YAR008W	mRNA	SGD	constitutive	10.0609	16.2366	22.1338	8.2606	5.58086	9.28456	9.9713	7.72088	10.1882	-14.7198	-18.5058	-18.3147	-18.4802	-19.0707	-16.8238	-17.9083	-15.8926	-18.3828
270	chrI	159016	159032	+	NA	NA	NA	NA	NA	NA	0.555327	NA	NA	NA	NA	NA	0.229234	NA	NA	-5.68291	NA	NA	NA	NA	NA	-3.77338
271	chrI	159090	159092	+	NA	NA	NA	NA	NA	NA	3.13363	NA	NA	1.55942	NA	1.00223	1.47728	NA	NA	0	NA	NA	0	NA	0	0
272	chrI	159150	159201	+	NA	NA	NA	NA	NA	NA	1.15032	0.310369	NA	0.695742	0.451531	0.779512	0.509408	NA	NA	-10.273	-2.98718	NA	-8.27911	-7.9281	-12.0714	-4.71285
273	chrI	169219	169371	+	YAR015W	mRNA	SGD	constitutive	545.673	594.921	249.501	72.6503	92.3084	222.973	333.041	93.9127	113.623	-16.7107	-15.6747	-18.2306	-14.7938	-18.3396	-18.1828	-17.2361	-17.8781	-18.3887
274	chrI	169392	169815	+	NA	NA	NA	NA	33.6107	14.8925	13.0105	3.34244	3.36346	13.9628	22.1626	3.7862	6.21478	-36.9387	-34.523	-32.4538	-20.7251	-24.7823	-32.9974	-36.9397	-27.022	-29.403
275	chrI	169867	170004	+	NA	NA	NA	NA	13.8488	7.15056	3.0543	0.859484	NA	4.79822	6.09566	0.927991	3.08192	-17.3457	-19.7761	-12.6181	-6.67169	NA	-14.944	-20.594	-16.0945	-11.0321
276	chrI	170071	170080	+	NA	NA	NA	NA	NA	NA	NA	NA	NA	NA	0.30102	NA	NA	NA	NA	NA	NA	NA	NA	-3.16993	NA	NA
277	chrI	170877	170933	+	CUT004	CUT	Xu_2009	NA	NA	NA	NA	5.15691	NA	NA	0.564413	2.67261	2.03763	NA	NA	NA	-13.8568	NA	NA	-3.96872	-10.5251	-14.856
278	chrI	174940	174995	+	YAR019W-A	mRNA	SGD	inducible	NA	NA	0.515661	NA	0.298975	NA	NA	1.81886	NA	NA	NA	-11.271	NA	-1.95974	NA	NA	-11.0762	NA
279	chrI	175261	175399	+	NA	NA	NA	NA	5.74176	6.31722	6.94159	15.0171	8.62043	7.50922	8.61671	22.8286	7.18265	-16.4614	-18.5832	-23.6793	-16.3045	-19.2376	-16.45	-20.6824	-18.7325	-21.0234
280	chrI	176675	176697	+	NA	NA	NA	NA	NA	NA	NA	2.12484	NA	0.311884	NA	1.26207	NA	NA	NA	NA	-8.90051	NA	-3.8902	NA	-6.79655	NA
281	chrI	179531	179697	+	NA	NA	NA	NA	NA	NA	0.356996	2.55458	NA	NA	NA	2.2643	NA	NA	NA	-2.57798	-15.6438	NA	NA	NA	-18.4463	NA
282	chrI	179829	179903	+	NA	NA	NA	NA	0.377071	0.376345	0.991656	0.931108	0.473376	NA	0.30102	3.89756	0.254704	-4.41491	-1.72624	-14.6099	-10.3159	-1.8989	NA	-8.0791	-15.7698	-8.54727
283	chrI	180188	180328	+	CUT005	CUT	Xu_2009	NA	0.634164	0.725808	1.11065	0.763986	2.29214	NA	0.865434	NA	4.76296	-13.5411	-14.0149	-7.8496	-11.0837	-16.8173	NA	-16.1472	NA	-23.3101
284	chrI	180387	180420	+	CUT005	CUT	Xu_2009	NA	NA	NA	NA	0.334244	NA	0.383858	NA	0.668153	0.713171	NA	NA	NA	-3.64578	NA	-3.31574	NA	-7.36052	-5.52333
285	chrI	181441	181446	+	NA	NA	NA	NA	NA	NA	NA	0.811735	NA	NA	NA	0.779512	NA	NA	NA	NA	-1.56102	NA	NA	NA	-2.28763	NA
286	chrI	182887	183008	+	YAR027W	mRNA	SGD	inducible	37.7071	NA	NA	NA	NA	NA	0.451531	0.593914	NA	-22.0973	NA	NA	NA	NA	NA	-10.1115	-11.0333	NA
287	chrI	183042	183166	+	YAR027W	mRNA	SGD	inducible	39.0611	NA	NA	NA	NA	NA	NA	NA	NA	-11.3602	NA	NA	NA	NA	NA	NA	NA	NA
288	chrI	183209	183275	+	YAR027W	mRNA	SGD	inducible	5.39897	NA	NA	NA	NA	NA	NA	NA	NA	-12.6437	NA	NA	NA	NA	NA	NA	NA	NA
289	chrI	183371	183393	+	YAR027W	mRNA	SGD	constitutive	12.5633	8.79035	26.0607	34.1884	14.7743	16.8657	24.7966	26.0951	13.5502	0	0	0	0	0	0	0	0	0
290	chrI	183480	183498	+	YAR027W	mRNA	SGD	inducible	0.239954	NA	NA	NA	NA	NA	NA	NA	NA	-4.16993	NA	NA	NA	NA	NA	NA	NA	NA
291	chrI	183580	184302	+	YAR027W	mRNA	SGD	constitutive	18.8364	33.9248	26.0607	35.3105	54.6376	35.8187	30.5912	43.0217	39.3518	-42.6548	-36.4812	-43.6273	-41.0986	-41.0408	-44.8203	-43.301	-46.7031	-40.5114
292	chrI	184802	184946	+	YAR028W	mRNA	SGD	constitutive	26.3607	48.1453	37.3656	69.0214	67.8174	67.7509	55.1996	65.9987	32.8313	-16.0939	-14.0496	-12.6198	-9.34242	-13.9713	-13.4406	-14.0385	-12.7697	-19.5632
293	chrI	185026	185041	+	NA	NA	NA	NA	NA	NA	NA	NA	NA	NA	0.225765	NA	NA	NA	NA	NA	NA	NA	NA	-3.90689	NA	NA
294	chrI	185107	185113	+	NA	NA	NA	NA	NA	NA	NA	NA	0.298975	0.359867	NA	0.222718	0.382056	NA	NA	NA	NA	-1.58496	-1.53892	NA	-2	-1.53892
295	chrI	185228	185355	+	NA	NA	NA	NA	1.78252	2.31183	0.95199	2.19646	3.23889	3.69463	3.34885	2.15294	2.11404	-18.9029	-20.082	-16.1689	-16.9119	-20.4444	-19.9587	-19.2444	-20.7583	-18.7424
296	chrI	185420	185427	+	NA	NA	NA	NA	NA	NA	NA	NA	NA	NA	0.225765	NA	NA	NA	NA	NA	NA	NA	NA	-2.80735	NA	NA
297	chrI	185897	185976	+	YAR029W	mRNA	SGD	constitutive	0.856979	1.31721	1.11065	10.8391	2.86517	1.22355	3.2736	7.98072	2.26686	-5.65751	-5.64372	-4.90943	-14.9952	-4.86732	-6.61513	-11.2874	-14.4833	-6.28094
298	chrI	186107	186110	+	YAR029W	mRNA	SGD	inducible	NA	NA	NA	NA	NA	NA	NA	NA	0.687701	NA	NA	NA	NA	NA	NA	NA	NA	-1.38956
299	chrI	186272	186318	+	YAR029W	mRNA	SGD	inducible	NA	NA	NA	1.2176	NA	NA	NA	0.296957	NA	NA	NA	NA	-9.21595	NA	NA	NA	-7.99065	NA
300	chrI	186452	186454	+	NA	NA	NA	NA	NA	NA	NA	NA	NA	NA	NA	NA	0.203763	NA	NA	NA	NA	NA	NA	NA	NA	-1
301	chrI	186902	187018	+	YAR031W	mRNA	SGD	constitutive	10.4894	14.6506	13.4072	16.9509	7.74842	11.5877	14.9381	11.804	10.4683	-16.3905	-17.0292	-15.2522	-14.4661	-16.9695	-15.1394	-14.4814	-13.8646	-17.2261
302	chrI	187156	187174	+	NA	NA	NA	NA	0.428489	0.618281	0.63466	1.07436	0.672693	0.311884	0.225765	0.853751	1.22258	-3.42341	-5.62631	-5.94434	-4.78784	-5.62893	-1.92247	-1	-1.51075	-5.61585
303	chrI	187317	187449	+	NA	NA	NA	NA	3.39364	2.44624	5.67227	12.2715	1.81876	4.60629	3.61224	7.86936	5.14502	-19.3348	-19.1965	-18.3262	-20.767	-12.1	-23.7623	-26.2102	-18.4918	-21.07
304	chrI	188026	188091	+	YAR033W	mRNA	SGD	constitutive	18.8878	19.5162	24.2361	25.3548	9.36787	21.3041	15.6907	20.7499	13.2191	-10.9402	-12.9047	-8.78687	-8.19837	-13.0246	-9.1509	-10.9509	-9.25773	-12.75
305	chrI	188464	188467	+	NA	NA	NA	NA	NA	NA	NA	NA	NA	NA	0.263393	NA	NA	NA	NA	NA	NA	NA	NA	-1.56155	NA	NA
306	chrI	188837	188945	+	NA	NA	NA	NA	1.38831	3.81721	5.59294	6.70875	9.29313	3.04687	3.76275	12.3237	2.0631	-14.1861	-15.5454	-20.1578	-18.7832	-14.7547	-17.1518	-18.6533	-20.2131	-11.9982
307	chrI	189294	189318	+	YAR035W	mRNA	SGD	inducible	NA	0.860217	1.03132	1.19373	7.34979	1.05561	1.54273	1.59614	1.42634	NA	-7.99214	-7.35207	-9.04589	-5.94137	-7.09975	-6.24799	-5.26274	-4.14128
308	chrI	189665	189666	+	YAR035W	mRNA	SGD	inducible	NA	NA	NA	2.33971	NA	NA	NA	NA	NA	NA	NA	NA	0	NA	NA	NA	NA	NA
309	chrI	189911	189913	+	YAR035W	mRNA	SGD	inducible	NA	NA	NA	0.381993	NA	NA	NA	NA	NA	NA	NA	NA	-0.954434	NA	NA	NA	NA	NA
311	chrI	190144	190779	+	YAR035W	mRNA	SGD	inducible	NA	2.87635	4.79961	361.58	38.0943	2.687	4.13903	11.9525	14.3144	NA	-13.8191	-28.561	-34.38	-25.4882	-21.7479	-26.9237	-27.7043	-27.5073
312	chrI	190932	190971	+	NA	NA	NA	NA	NA	NA	NA	1.48022	NA	NA	NA	NA	NA	NA	NA	NA	-7.54565	NA	NA	NA	NA	NA
313	chrI	191090	191093	+	NA	NA	NA	NA	NA	NA	NA	2.05321	0.323889	NA	NA	NA	NA	NA	NA	NA	-1.58496	-1.57819	NA	NA	NA	NA
314	chrI	191204	191240	+	NA	NA	NA	NA	NA	NA	NA	1.67122	NA	NA	NA	NA	NA	NA	NA	NA	-12.6426	NA	NA	NA	NA	NA
315	chrI	191365	191381	+	NA	NA	NA	NA	NA	NA	NA	2.5307	NA	NA	NA	NA	NA	NA	NA	NA	0	NA	NA	NA	NA	NA
316	chrI	191465	191698	+	NA	NA	NA	NA	NA	0.725808	3.01463	7.87861	0.54812	1.17556	0.978316	2.78397	1.09523	NA	-12.7619	-13.6584	-19.0427	-7.17654	-13.322	-8.51303	-14.9723	-15.7419
317	chrI	191802	191830	+	NA	NA	NA	NA	NA	NA	0.753658	7.54436	NA	NA	NA	NA	0.942405	NA	NA	-1.93062	-0.478692	NA	NA	NA	NA	-4.24409
318	chrI	191872	192018	+	NA	NA	NA	NA	0.856979	1.61291	8.29024	14.3009	1.56962	0.959644	2.74681	4.08316	1.88481	-12.9617	-4.50064	-14.8455	-19.6282	-13.8521	-11.4542	-13.5475	-15.3822	-16.4536
320	chrI	192529	192952	+	YAR042W	mRNA	SGD	constitutive	5.19329	12.2581	69.7332	99.0556	21.2272	44.5275	35.7085	87.3054	41.5167	-19.9229	-22.2515	-31.0037	-25.8376	-22.2715	-29.6569	-24.9723	-27.3607	-29.276
321	chrI	193060	193066	+	NA	NA	NA	NA	NA	NA	1.11065	0.811735	NA	0.575787	NA	0.705273	0.687701	NA	NA	-1.49032	-1.52107	NA	-1.28585	NA	-4.0259	-1.45546
322	chrI	193299	193354	+	NA	NA	NA	NA	NA	NA	0.674326	0.763986	NA	0.479822	0.263393	0.853751	0.483937	NA	NA	-0.997503	-10.6316	NA	-0.992774	-0.985228	-14.5547	-0.949452
323	chrI	193405	193420	+	NA	NA	NA	NA	NA	NA	0.436329	NA	NA	NA	NA	NA	0.407526	NA	NA	-3.12817	NA	NA	NA	NA	NA	-1.58496
324	chrI	193593	193595	+	NA	NA	NA	NA	NA	NA	0.63466	NA	NA	NA	NA	NA	NA	NA	NA	-0.696212	NA	NA	NA	NA	NA	NA
325	chrI	193688	193897	+	NA	NA	NA	NA	NA	0.430109	4.32362	1.28923	0.921838	2.13521	1.76849	5.49371	2.08857	NA	-0.811278	-20.6137	-12.4029	-9.33664	-17.5958	-13.9543	-22.8079	-17.2447
326	chrI	194087	194094	+	NA	NA	NA	NA	NA	NA	NA	NA	NA	NA	NA	0.296957	NA	NA	NA	NA	NA	NA	NA	NA	-2.67943	NA
327	chrI	194172	194252	+	NA	NA	NA	NA	NA	0.241936	2.22131	0.334244	NA	1.46346	NA	2.11582	0.560349	NA	-9.85552	-18.6873	-9.52918	NA	-13.5096	NA	-15.2618	-11.6201
328	chrI	194432	194641	+	NA	NA	NA	NA	NA	0.215054	4.16495	NA	0.27406	1.8953	0.413903	3.86044	1.01882	NA	-13.0618	-22.619	NA	-0.99403	-21.3507	-17.0212	-24.5542	-18.5424
329	chrI	194881	194954	+	NA	NA	NA	NA	NA	NA	1.70565	NA	NA	NA	NA	0.371196	NA	NA	NA	-11.5458	NA	NA	NA	NA	-13.1371	NA
330	chrI	195072	195235	+	NA	NA	NA	NA	NA	NA	1.66598	NA	NA	0.359867	NA	1.15071	NA	NA	NA	-20.9739	NA	NA	-4.26472	NA	-11.5588	NA
331	chrI	195590	195727	+	NA	NA	NA	NA	NA	NA	3.33196	NA	NA	1.0796	0.639668	2.30142	0.993345	NA	NA	-11.3521	NA	NA	-9.15965	-14.9029	-9.07488	-6.36064
332	chrI	195777	195847	+	NA	NA	NA	NA	0.737002	NA	5.27561	1.07436	1.39521	1.70337	1.80612	3.37789	1.98669	-1.38625	NA	-6.69427	-2.44841	-1.08713	0	-4.8488	-4.6821	-1.98253
333	chrI	196473	196482	+	NA	NA	NA	NA	NA	NA	NA	0.286495	NA	NA	NA	NA	NA	NA	NA	NA	-3.10611	NA	NA	NA	NA	NA
334	chrI	196770	196776	+	1F-89	XUT	Van_Dijk_2011	NA	NA	NA	NA	1.69509	NA	NA	NA	1.03935	NA	NA	NA	NA	0	NA	NA	NA	-1.93768	NA
335	chrI	196842	196892	+	1F-89	XUT	Van_Dijk_2011	NA	NA	NA	0.396662	NA	NA	NA	NA	NA	1.52822	NA	NA	-8.09451	NA	NA	NA	NA	NA	-13.6985
336	chrI	198471	198554	+	1F-90	XUT	Van_Dijk_2011	NA	0.291373	4.78496	1.07099	4.34517	5.73035	4.24643	2.14477	12.398	NA	-9.34022	-15.7677	-5.48449	-10.0427	-10.8871	-3.24546	-7.93241	-10.486	NA
337	chrI	198732	199500	+	1F-90	XUT	Van_Dijk_2011	NA	17.191	15.9678	14.2798	44.4783	17.8139	17.1297	16.1422	32.257	25.827	-47.9931	-46.0245	-41.8898	-44.8777	-43.9209	-42.842	-47.0503	-34.6352	-49.9471
338	chrI	199542	199548	+	1F-90	XUT	Van_Dijk_2011	NA	NA	NA	NA	NA	NA	NA	NA	0.296957	NA	NA	NA	NA	NA	NA	NA	NA	-2.46718	NA
339	chrI	200030	200063	+	NA	NA	NA	NA	NA	NA	NA	NA	NA	NA	NA	0.890871	NA	NA	NA	NA	NA	NA	NA	NA	-7.81273	NA
340	chrI	200580	200754	+	1F-93	XUT	Van_Dijk_2011	NA	6.61588	7.2312	8.88524	39.4885	7.94774	18.4012	10.912	42.8732	11.207	-13.9528	-14.4799	-14.0043	-14.6931	-14.5423	-13.8291	-18.1491	-19.1151	-15.2174
341	chrI	201230	201233	+	1F-93	XUT	Van_Dijk_2011	NA	NA	NA	NA	0.381993	NA	NA	NA	0.408316	NA	NA	NA	NA	-1.56705	NA	NA	NA	-1.5755	NA
342	chrI	207593	207624	+	NA	NA	NA	NA	1.14835	0.322581	NA	NA	NA	NA	NA	0.334077	NA	-8.82469	-3.70044	NA	NA	NA	NA	NA	-1.83659	NA
343	chrI	208206	208225	+	YAR053W	mRNA	SGD	inducible	NA	NA	NA	NA	NA	NA	NA	0.259837	NA	NA	NA	NA	NA	NA	NA	NA	-4.18518	NA
344	chrI	208726	208833	+	NA	NA	NA	NA	0.222814	NA	NA	2.69783	0.722522	NA	NA	2.93245	NA	-8.46482	NA	NA	-18.4034	-10.1293	NA	NA	-22.4739	NA
345	chrI	225686	225689	+	NA	NA	NA	NA	NA	0.2957	NA	NA	NA	NA	NA	0.222718	NA	NA	-1.49884	NA	NA	NA	NA	NA	-1.58496	NA
346	chrI	227495	227521	+	YAR073W	mRNA	SGD	inducible	NA	0.698927	NA	NA	NA	NA	NA	0.334077	0.458467	NA	-6.84979	NA	NA	NA	NA	NA	-0.918296	-0.964079
347	chrI	5474	5505	-	1R-2	XUT	Van_Dijk_2011	NA	NA	NA	NA	1.05048	NA	NA	0.526786	1.59614	NA	NA	NA	NA	-10.1084	NA	NA	-8.46748	-6.48356	NA
348	chrI	6300	6370	-	NA	NA	NA	NA	3.99352	3.70969	4.79961	13.3459	4.40988	7.24531	3.16071	15.6274	8.32882	-11.2043	-7.82083	-13.3732	-13.0366	-10.9766	-10.6061	-10.8109	-15.4806	-12.1958
349	chrI	8541	8557	-	NA	NA	NA	NA	0.239954	NA	0.237997	NA	NA	NA	NA	NA	NA	-3.94091	NA	-4	NA	NA	NA	NA	NA	NA
350	chrI	9044	9050	-	YAL067C	mRNA	SGD	inducible	0.479908	NA	NA	NA	NA	NA	NA	NA	NA	-4.00721	NA	NA	NA	NA	NA	NA	NA	NA
351	chrI	9182	9211	-	YAL067C	mRNA	SGD	inducible	NA	NA	NA	1.09823	NA	NA	NA	NA	NA	NA	NA	NA	-9.14467	NA	NA	NA	NA	NA
352	chrI	16595	16598	-	NA	NA	NA	NA	NA	NA	NA	NA	NA	NA	NA	0.631034	NA	NA	NA	NA	NA	NA	NA	NA	-1.581	NA
353	chrI	16694	16702	-	NA	NA	NA	NA	NA	NA	NA	NA	NA	NA	NA	0.259837	NA	NA	NA	NA	NA	NA	NA	NA	-2.95568	NA
354	chrI	16757	16766	-	NA	NA	NA	NA	NA	NA	NA	0.859484	NA	NA	NA	0.445436	NA	NA	NA	NA	-4.52096	NA	NA	NA	-1.95974	NA
355	chrI	16830	16848	-	NA	NA	NA	NA	NA	NA	NA	1.19373	NA	NA	NA	0.816632	NA	NA	NA	NA	-3.01039	NA	NA	NA	-3.52505	NA
356	chrI	17785	17795	-	1R-5	XUT	Van_Dijk_2011	NA	NA	NA	NA	NA	NA	NA	NA	0.296957	NA	NA	NA	NA	NA	NA	NA	NA	-3.17056	NA
357	chrI	19034	19077	-	NA	NA	NA	NA	0.274233	NA	0.277664	2.98432	0.249145	NA	NA	3.7862	NA	-8.0791	NA	-7.64395	-13.5435	-3.58496	NA	NA	-13.2462	NA
358	chrI	19284	19291	-	NA	NA	NA	NA	NA	NA	NA	0.716237	NA	NA	NA	NA	NA	NA	NA	NA	-2.4741	NA	NA	NA	NA	NA
359	chrI	20101	20110	-	NA	NA	NA	NA	NA	NA	NA	0.52524	NA	NA	NA	0.259837	NA	NA	NA	NA	-6.32093	NA	NA	NA	-2.28763	NA
360	chrI	20571	20592	-	NA	NA	NA	NA	0.291373	NA	0.237997	0.692362	NA	NA	NA	0.334077	NA	-0.977418	NA	-1	-6.37385	NA	NA	NA	-0.991076	NA
361	chrI	20779	20791	-	NA	NA	NA	NA	NA	NA	NA	0.83561	NA	0.575787	NA	NA	0.305645	NA	NA	NA	-3.32515	NA	-5.43357	NA	NA	-3.51279
362	chrI	23185	23282	-	YAL063C-A	mRNA	SGD	inducible	0.428489	NA	0.63466	5.10916	0.647778	NA	0.526786	3.26653	0.305645	-2.29775	NA	-2.4085	-13.0286	-9.78959	NA	-2.18328	-16.5347	-7.68249
363	chrI	23603	23645	-	YAL063C-A	mRNA	SGD	inducible	NA	NA	NA	0.954982	NA	NA	NA	1.8931	0.840523	NA	NA	NA	-9.08066	NA	NA	NA	-10.6427	-11.5548
364	chrI	24403	24410	-	NA	NA	NA	NA	0.308512	NA	NA	NA	NA	NA	NA	NA	NA	-4.44955	NA	NA	NA	NA	NA	NA	NA	NA
365	chrI	24613	24621	-	NA	NA	NA	NA	NA	NA	0.237997	NA	NA	NA	NA	NA	NA	NA	NA	-3	NA	NA	NA	NA	NA	NA
366	chrI	24717	24755	-	NA	NA	NA	NA	NA	0.645163	0.436329	1.5041	1.32047	NA	0.451531	0.853751	0.63676	NA	-7.26722	-7.01301	-11.1255	-11.4466	NA	-7.36034	-9.07945	-7.46793
367	chrI	25069	25136	-	NA	NA	NA	NA	NA	NA	NA	0.405868	NA	NA	NA	0.222718	0.432997	NA	NA	NA	-12.0711	NA	NA	NA	-4.16993	-6.69279
368	chrI	28368	28378	-	YAL063C	mRNA	SGD	inducible	NA	NA	NA	NA	NA	NA	0.489158	NA	NA	NA	NA	NA	NA	NA	NA	-3.19316	NA	NA
369	chrI	28436	28492	-	YAL063C	mRNA	SGD	inducible	NA	0.2957	NA	0.453617	NA	1.31951	3.91326	0.259837	NA	NA	-3.49936	NA	-1.8989	NA	-6.65601	-11.4341	-0.985228	NA
370	chrI	29112	29144	-	1R-16	XUT	Van_Dijk_2011	NA	NA	NA	NA	NA	1.12115	NA	NA	NA	NA	NA	NA	NA	NA	-8.80039	NA	NA	NA	NA
371	chrI	29746	29784	-	1R-16	XUT	Van_Dijk_2011	NA	0.737002	1.39785	1.54698	3.03207	1.24573	2.59104	0.978316	2.96957	0.713171	-5.41327	-7.72727	-4.37458	-5.43591	-5.49591	-8.016	-4.36566	-7.10507	-6.88202
372	chrI	30653	30709	-	CUT437	CUT	Xu_2009	NA	NA	0.403227	NA	0.501366	3.68735	NA	1.88138	0.222718	NA	NA	-3.55399	NA	-3.45248	-8.36712	NA	-4.09837	-1.58496	NA
373	chrI	30754	30778	-	CUT437	CUT	Xu_2009	NA	NA	NA	NA	NA	1.7191	NA	NA	0.296957	NA	NA	NA	NA	NA	-5.81829	NA	NA	-1.51274	NA
374	chrI	31016	31065	-	NA	NA	NA	NA	NA	NA	0.356996	3.8438	2.41671	0.64776	0.827806	1.11359	NA	NA	NA	-1.83659	-0.611552	-10.3025	-2.42247	-4.74543	-4.32028	NA
375	chrI	31413	31619	-	SUT434	SUT	Xu_2009	NA	3.95924	7.20432	13.6849	51.951	40.536	11.4677	22.426	26.7261	12.4041	-24.0635	-23.2231	-20.1106	-20.3182	-27.2871	-16.97	-21.3855	-18.061	-28.9223
376	chrI	31795	31808	-	1R-18	XUT	Van_Dijk_2011	NA	NA	NA	NA	NA	NA	NA	NA	NA	0.865993	NA	NA	NA	NA	NA	NA	NA	NA	-6.76994
377	chrI	32005	32159	-	1R-18	XUT	Van_Dijk_2011	NA	NA	NA	0.31733	1.19373	NA	NA	NA	1.00223	4.17714	NA	NA	-9.17294	-14.5747	NA	NA	NA	-13.356	-19.6684
378	chrI	32252	32254	-	1R-18	XUT	Van_Dijk_2011	NA	NA	NA	NA	NA	NA	NA	NA	NA	0.229234	NA	NA	NA	NA	NA	NA	NA	NA	-0.991076
379	chrI	32299	32422	-	1R-18	XUT	Van_Dijk_2011	NA	0.291373	0.806454	2.53864	3.12757	3.03957	3.38275	1.99426	6.34746	12.8116	-3.24034	-9.4846	-17.3355	-16.2507	-12.379	-13.6916	-12.3299	-18.2808	-20.1071
380	chrI	32462	32610	-	1R-18	XUT	Van_Dijk_2011	NA	0.719862	1.53226	4.48228	9.4782	4.2853	5.18208	1.919	8.1292	29.3164	-14.2197	-10.5141	-16.6181	-21.4794	-19.1556	-17.6582	-18.7529	-18.6099	-22.4096
381	chrI	32631	32766	-	1R-18	XUT	Van_Dijk_2011	NA	1.95391	2.90323	13.7245	34.4987	15.148	9.23658	7.11161	24.202	39.6829	-15.7438	-20.1617	-21.0763	-21.1194	-24.4442	-23.8685	-22.7229	-22.6588	-25.3045
382	chrI	32851	32854	-	1R-18	XUT	Van_Dijk_2011	NA	NA	NA	0.277664	NA	NA	NA	NA	NA	NA	NA	NA	-1.56155	NA	NA	NA	NA	NA	NA
383	chrI	32930	32982	-	1R-18	XUT	Van_Dijk_2011	NA	0.976956	0.806454	0.991656	2.93657	2.71569	0.959644	0.940689	1.5219	2.95457	-9.53898	-6.20973	-8.80362	-11.584	-11.6606	-8.48328	-6.06184	-13.3066	-11.3695
384	chrI	33761	33782	-	1R-18	XUT	Van_Dijk_2011	NA	NA	NA	NA	1.02661	NA	NA	0.225765	NA	NA	NA	NA	NA	-5.43211	NA	NA	-4.39232	NA	NA
385	chrI	34072	34089	-	1R-18	XUT	Van_Dijk_2011	NA	NA	0.241936	0.356996	0.978857	NA	NA	0.338648	NA	NA	NA	-2.7823	-3.55297	-7.15528	NA	NA	-5.86506	NA	NA
386	chrI	34239	34524	-	CUT438	CUT	Xu_2009	NA	5.51894	8.62905	14.2798	24.5192	2.98975	6.40563	7.03635	13.4744	3.99885	-13.4195	-19.2044	-21.5437	-22.6267	-23.098	-19.6544	-15.6335	-21.3333	-20.9715
387	chrI	34735	34785	-	CUT438	CUT	Xu_2009	NA	NA	0.833335	0.31733	0.405868	1.34539	0.695742	NA	0.519675	0.407526	NA	-1.01024	-8.63508	-11.1464	-4.6041	-1.41628	NA	-11.0874	-2.08054
388	chrI	36348	36355	-	CUT439	CUT	Xu_2009	NA	NA	NA	NA	NA	NA	0.287893	NA	NA	NA	NA	NA	NA	NA	NA	-2.75084	NA	NA	NA
389	chrI	37251	37278	-	YAL059C-A	mRNA	SGD	inducible	NA	NA	NA	NA	NA	0.335876	NA	2.00446	NA	NA	NA	NA	NA	NA	-3.53201	NA	-5.45125	NA
390	chrI	39023	39041	-	NA	NA	NA	NA	NA	NA	NA	NA	NA	NA	NA	0.259837	NA	NA	NA	NA	NA	NA	NA	NA	-4.10833	NA
391	chrI	42700	42713	-	NA	NA	NA	NA	NA	NA	0.515661	NA	NA	0.983635	NA	NA	NA	NA	NA	-1.99145	NA	NA	-2.43998	NA	NA	NA
392	chrI	42942	43491	-	NA	NA	NA	NA	45.9512	27.8227	23.6411	18.3118	23.3449	23.3194	29.7258	22.8286	12.5569	-41.4003	-29.4767	-30.1549	-35.4984	-43.5041	-28.9687	-34.1109	-38.1448	-37.9934
393	chrI	43548	43630	-	NA	NA	NA	NA	4.73052	1.39785	3.33196	6.7565	3.28872	1.36749	1.35459	11.8412	3.51491	-14.9807	-10.0343	-13.9681	-13.0655	-15.0816	-9.84984	-17.3551	-10.6299	-15.1303
394	chrI	43683	43693	-	NA	NA	NA	NA	NA	NA	NA	NA	NA	NA	NA	0.371196	NA	NA	NA	NA	NA	NA	NA	NA	-2.92758	NA
395	chrI	43857	43860	-	NA	NA	NA	NA	NA	NA	NA	0.740111	NA	NA	NA	NA	NA	NA	NA	NA	-1.55509	NA	NA	NA	NA	NA
396	chrI	43984	44036	-	NA	NA	NA	NA	NA	NA	NA	1.19373	0.622864	NA	NA	NA	NA	NA	NA	NA	-12.3596	-10.909	NA	NA	NA	NA
397	chrI	44207	44487	-	NA	NA	NA	NA	NA	NA	1.46765	62.4559	21.6507	NA	5.00446	3.67484	3.54038	NA	NA	-13.7262	-20.5638	-21.5149	NA	-18.7493	-16.2607	-19.3153
398	chrI	44520	44636	-	NA	NA	NA	NA	NA	NA	NA	4.67941	1.24573	NA	0.602041	0.371196	0.382056	NA	NA	NA	-11.7316	-7.74024	NA	-15.9424	-6.67328	-5.79339
399	chrI	44697	44719	-	NA	NA	NA	NA	NA	NA	NA	0.787861	0.398633	NA	NA	NA	NA	NA	NA	NA	-6.24923	-3.87261	NA	NA	NA	NA
400	chrI	44775	44841	-	NA	NA	NA	NA	NA	NA	0.396662	8.97683	2.86517	NA	1.0912	0.668153	0.713171	NA	NA	-1.58496	-5.05012	-1.5305	NA	-4.80969	-1.45546	-4.84543
401	chrI	44909	44965	-	NA	NA	NA	NA	NA	NA	NA	1.14598	NA	NA	NA	NA	NA	NA	NA	NA	-14.2022	NA	NA	NA	NA	NA
402	chrI	45002	45104	-	YAL054C	mRNA	SGD	constitutive	9.76956	18.6828	50.9314	584.974	430.399	10.0283	96.0631	79.3989	43.7072	-9.01192	-8.65825	-8.97026	-6.58546	-9.7703	-9.41332	-9.04674	-9.29017	-9.32266
403	chrI	45651	45708	-	YAL054C	mRNA	SGD	constitutive	6.42734	0.913981	0.872657	7.47274	1.86859	2.1592	0.489158	8.01784	1.47728	-14.1529	-11.9421	-4.82458	-16.5223	-13.5357	-15.4899	-3.30773	-14.0062	-9.63805
404	chrI	46506	46525	-	NA	NA	NA	NA	NA	NA	NA	0.692362	NA	NA	NA	NA	NA	NA	NA	NA	-6.43444	NA	NA	NA	NA	NA
405	chrI	48167	48188	-	NA	NA	NA	NA	NA	NA	NA	NA	NA	NA	NA	NA	0.534878	NA	NA	NA	NA	NA	NA	NA	NA	-3.7911
406	chrI	52057	52233	-	NA	NA	NA	NA	3.51361	0.618281	0.872657	0.811735	NA	1.41548	0.677296	1.03935	0.865993	-14.3039	-11.0525	-14.8612	-11.3927	NA	-10.4947	-14.7192	-14.0033	-11.2217
407	chrI	52310	52320	-	NA	NA	NA	NA	0.257094	NA	NA	NA	NA	NA	NA	NA	NA	-3.31127	NA	NA	NA	NA	NA	NA	NA	NA
408	chrI	52377	52390	-	NA	NA	NA	NA	1.11407	NA	0.396662	0.549115	NA	0.887671	0.827806	NA	0.687701	-7.16357	NA	-0.881291	-4.6726	NA	-3.8433	-8.17422	NA	-6.28301
409	chrI	52509	52702	-	YAL049C	mRNA	SGD	constitutive	72.4147	32.3119	46.5682	48.6086	23.4695	45.2232	42.2934	50.8168	34.869	-17.9013	-17.5562	-17.1742	-16.604	-17.9024	-15.1905	-15.589	-15.3961	-17.7486
410	chrI	53222	53306	-	NA	NA	NA	NA	0.308512	NA	1.03132	NA	2.98975	0.599778	0.30102	0.927991	0.942405	-1.52803	NA	-1.57819	NA	-17.2198	-1.58313	-1.58496	-2.05961	-1.51663
411	chrI	53362	53380	-	NA	NA	NA	NA	NA	NA	NA	NA	0.423547	NA	NA	NA	NA	NA	NA	NA	NA	-3.64444	NA	NA	NA	NA
412	chrI	53922	53925	-	NA	NA	NA	NA	NA	NA	NA	NA	NA	NA	NA	NA	0.203763	NA	NA	NA	NA	NA	NA	NA	NA	-1.58496
413	chrI	54244	54264	-	NA	NA	NA	NA	NA	NA	NA	NA	NA	NA	NA	0.334077	0.254704	NA	NA	NA	NA	NA	NA	NA	-6.85009	-4.24793
414	chrI	54377	54414	-	NA	NA	NA	NA	NA	NA	NA	NA	NA	NA	NA	0.890871	NA	NA	NA	NA	NA	NA	NA	NA	-8.93823	NA
415	chrI	54470	54473	-	NA	NA	NA	NA	NA	NA	0.356996	0.859484	NA	0.287893	NA	0.296957	0.203763	NA	NA	-0.918296	-2.27697	NA	-1.55306	NA	-1.51274	-1
416	chrI	54739	54825	-	YAL048C	mRNA	SGD	constitutive	4.83336	4.11291	6.26727	16.5689	8.0474	4.89419	8.01467	9.91094	7.743	-9.87553	-8.73645	-9.48278	-13.4119	-11.4983	-9.88526	-13.5838	-15.9744	-16.1968
417	chrI	55206	55255	-	YAL048C	mRNA	SGD	inducible	NA	NA	NA	NA	NA	NA	NA	0.668153	NA	NA	NA	NA	NA	NA	NA	NA	-12.8466	NA
418	chrI	55562	55564	-	NA	NA	NA	NA	NA	NA	NA	NA	NA	NA	NA	0.296957	NA	NA	NA	NA	NA	NA	NA	NA	-0.954434	NA
419	chrI	56472	56478	-	NA	NA	NA	NA	NA	NA	NA	NA	NA	NA	NA	0.222718	NA	NA	NA	NA	NA	NA	NA	NA	-2.58496	NA
420	chrI	56757	56906	-	YAL047C	mRNA	SGD	constitutive	10.7465	10.3764	17.3738	20.2218	16.4685	14.9944	11.8903	19.4507	13.8814	-11.6609	-9.98125	-7.43604	-13.2447	-13.1907	-10.0126	-8.11363	-11.4872	-9.13097
421	chrI	57269	57287	-	YAL047C	mRNA	SGD	inducible	NA	NA	NA	NA	NA	NA	NA	0.259837	0.229234	NA	NA	NA	NA	NA	NA	NA	-4.10833	-0.991076
422	chrI	57319	57445	-	YAL046C	mRNA	SGD	constitutive	19.5048	18.9248	15.5095	8.78584	12.8061	10.0283	16.8571	11.3215	14.0087	-13.8145	-14.9722	-14.2031	-14.5725	-14.2309	-16.9179	-15.8984	-15.1078	-18.6973
423	chrI	58176	58344	-	NA	NA	NA	NA	9.68386	8.38712	12.6535	5.51502	4.958	9.09263	13.433	10.0594	7.94676	-27.5222	-31.1335	-22.1221	-27.6367	-25.0256	-17.5775	-30.4428	-23.6024	-29.5873
424	chrI	58371	58524	-	YAL044C	mRNA	SGD	constitutive	195.305	212.554	373.973	86.7363	65.4505	256.417	284.803	320.602	92.0755	-7.32369	-7.2377	-7.5693	-7.65026	-7.45987	-7.86958	-9.20049	-6.77703	-9.42697
425	chrI	59074	59138	-	NA	NA	NA	NA	NA	NA	NA	0.429742	NA	NA	NA	NA	0.407526	NA	NA	NA	-8.89436	NA	NA	NA	NA	-6.18472
426	chrI	59229	59247	-	NA	NA	NA	NA	NA	NA	NA	NA	NA	NA	NA	NA	0.356586	NA	NA	NA	NA	NA	NA	NA	NA	-6.49114
427	chrI	59491	59561	-	NA	NA	NA	NA	NA	NA	4.32362	NA	1.12115	2.23117	0.639668	2.52413	3.51491	NA	NA	-21.2041	NA	-16.5894	-16.8577	-13.5309	-20.7728	-20.3202
428	chrI	59610	59677	-	NA	NA	NA	NA	NA	NA	1.74531	NA	0.423547	0.791707	0.526786	0.853751	1.55369	NA	NA	-14.615	NA	-6.76664	-9.64392	-10.2063	-6.58521	-11.492
429	chrI	59813	59815	-	NA	NA	NA	NA	NA	NA	0.713992	NA	NA	NA	NA	NA	0.560349	NA	NA	-0.991076	NA	NA	NA	NA	NA	-0.845351
430	chrI	59886	59969	-	NA	NA	NA	NA	NA	NA	3.56996	NA	1.51979	1.96727	1.01594	2.41278	4.50826	NA	NA	-7.75252	NA	-2.64164	-7.26253	-5.48934	-12.9348	-10.8369
431	chrI	60005	60052	-	NA	NA	NA	NA	NA	NA	0.555327	0.763986	NA	0.311884	NA	NA	0.63676	NA	NA	-6.19961	-11.003	NA	-0.961237	NA	NA	-7.33121
432	chrI	60123	60133	-	NA	NA	NA	NA	NA	NA	1.15032	NA	0.82218	0.983635	NA	0.816632	1.85934	NA	NA	-1.95467	NA	-0.613619	-0.659376	NA	-3.54422	-1.03026
433	chrI	60193	60284	-	NA	NA	NA	NA	NA	NA	1.46765	0.883359	NA	1.3435	0.677296	1.07647	2.90362	NA	NA	-10.3517	-14.0103	NA	-11.9682	-14.1972	-13.4238	-10.8848
434	chrI	60415	60526	-	NA	NA	NA	NA	NA	NA	0.95199	0.572989	NA	0.791707	0.602041	0.482555	1.83387	NA	NA	-15.6389	-12.7453	NA	-16.5172	-15.8626	-14.0331	-17.5176
435	chrI	60724	60742	-	NA	NA	NA	NA	NA	NA	NA	NA	NA	0.239911	NA	0.222718	NA	NA	NA	NA	NA	NA	-1.58496	NA	-4	NA
436	chrI	61007	61101	-	YAL043C	mRNA	SGD	constitutive	1.71396	3.14517	6.90192	6.54163	7.17539	7.91707	7.56314	10.9503	9.5514	-12.8797	-16.2459	-14.7897	-13.7071	-15.8294	-12.6739	-13.4807	-14.13	-18.2738
437	chrI	61559	61570	-	NA	NA	NA	NA	NA	NA	NA	NA	NA	NA	NA	0.519675	NA	NA	NA	NA	NA	NA	NA	NA	-2.59317	NA
438	chrI	61751	61861	-	YAL042C-A	mRNA	SGD	inducible	NA	NA	NA	3.07982	NA	NA	NA	NA	1.27352	NA	NA	NA	-9.364	NA	NA	NA	NA	-12.4483
439	chrI	61984	61986	-	YAL042C-A	mRNA	SGD	inducible	NA	NA	NA	0.429742	NA	NA	NA	NA	0.713171	NA	NA	NA	-0.852405	NA	NA	NA	NA	-0.966619
440	chrI	62212	62216	-	YAL042C-A	mRNA	SGD	inducible	NA	NA	NA	0.26262	NA	NA	NA	NA	NA	NA	NA	NA	-1.98806	NA	NA	NA	NA	NA
441	chrI	62499	62557	-	YAL042C-A	mRNA	SGD	inducible	1.35403	0.913981	NA	2.5307	1.29556	2.49508	0.376275	3.04381	3.48944	-11.8285	-6.8197	NA	-8.75754	-10.1756	-9.116	-2.64387	-13.1232	-12.343
442	chrI	64656	64671	-	NA	NA	NA	NA	NA	NA	NA	NA	NA	NA	NA	0.222718	NA	NA	NA	NA	NA	NA	NA	NA	-3.90689	NA
443	chrI	65965	65984	-	NA	NA	NA	NA	NA	NA	NA	NA	NA	NA	NA	NA	0.229234	NA	NA	NA	NA	NA	NA	NA	NA	-4.21002
444	chrI	66037	66107	-	NA	NA	NA	NA	0.239954	NA	0.793325	NA	0.797266	0.86368	0.413903	2.0787	2.52157	-7.85475	NA	-0.811278	NA	-5.77893	-8.61331	-6.65354	-12.9473	-15.3202
445	chrI	66167	66338	-	NA	NA	NA	NA	2.84517	1.7742	8.21091	1.74284	3.26381	4.53432	1.58036	9.20567	11.9456	-9.90167	-4.93401	-11.1126	-4.92054	-4.9691	-11.9896	-4.02012	-15.1722	-12.4203
446	chrI	66399	66415	-	NA	NA	NA	NA	NA	NA	NA	NA	NA	NA	NA	0.222718	NA	NA	NA	NA	NA	NA	NA	NA	-4	NA
447	chrI	66531	66547	-	NA	NA	NA	NA	NA	NA	1.11065	NA	NA	NA	NA	1.15071	1.55369	NA	NA	-4.89795	NA	NA	NA	NA	0	-2.06954
448	chrI	67081	67095	-	NA	NA	NA	NA	NA	NA	NA	NA	NA	NA	NA	NA	0.280174	NA	NA	NA	NA	NA	NA	NA	NA	-3.60046
449	chrI	67363	67385	-	NA	NA	NA	NA	NA	NA	NA	NA	NA	0.455831	NA	0.631034	0.993345	NA	NA	NA	NA	NA	-3.46719	NA	-3.28226	-6.97183
450	chrI	67437	67479	-	NA	NA	NA	NA	NA	NA	NA	NA	NA	NA	0.263393	0.259837	NA	NA	NA	NA	NA	NA	NA	-3.27286	-7.26465	NA
451	chrI	67530	67542	-	YAL040C	mRNA	SGD	inducible	NA	NA	NA	NA	NA	NA	NA	0.445436	0.331115	NA	NA	NA	NA	NA	NA	NA	-1	-5.65213
452	chrI	67663	67697	-	YAL040C	mRNA	SGD	inducible	NA	0.645163	0.436329	0.859484	0.772351	0.815698	0.30102	1.07647	1.85934	NA	-4.9276	-4.9851	-3.95627	-4.78515	-6.6022	-2.58496	-6.21456	-8.01765
453	chrI	67747	67900	-	YAL040C	mRNA	SGD	constitutive	73.3574	72.8765	111.026	188.848	109.176	146.538	84.361	269.006	226.024	-8.82207	-7.97926	-12.1089	-5.48994	-9.04152	-9.05	-9.76499	-8.55388	-11.1467
454	chrI	68067	68091	-	YAL040C	mRNA	SGD	inducible	NA	0.268818	NA	NA	NA	0.983635	0.30102	NA	NA	NA	-4.04879	NA	NA	NA	-8.6604	-4.19218	NA	NA
455	chrI	68167	68290	-	YAL040C	mRNA	SGD	inducible	NA	0.75269	1.70565	2.19646	0.82218	2.99889	2.25765	0.96511	0.865993	NA	-11.5812	-14.4857	-16.8484	-11.9253	-14.9898	-16.9047	-11.7077	-13.5243
456	chrI	68532	68601	-	NA	NA	NA	NA	NA	NA	0.515661	0.429742	NA	1.55942	NA	1.03935	1.40087	NA	NA	-11.3507	-7.78894	NA	-10.7759	NA	-14.3265	-11.3426
457	chrI	68912	68920	-	NA	NA	NA	NA	0.257094	NA	NA	NA	NA	NA	NA	NA	NA	-2.99037	NA	NA	NA	NA	NA	NA	NA	NA
458	chrI	68994	69268	-	NA	NA	NA	NA	3.13654	NA	3.84762	9.78857	1.74402	1.70337	2.67156	3.00669	2.98004	-23.0527	NA	-23.3705	-31.235	-22.0262	-18.9611	-25.4274	-24.5786	-24.269
460	chrI	69344	69659	-	YAL039C	mRNA	SGD	constitutive	135.351	59.8926	157.872	270.905	124.174	99.6591	103.438	163.995	123.812	-22.649	-20.4313	-21.2615	-22.165	-22.9048	-20.024	-21.3669	-21.7958	-20.8736
461	chrI	70032	70166	-	YAL039C	mRNA	SGD	inducible	0.925537	NA	NA	0.668488	NA	NA	NA	0.222718	NA	-11.702	NA	NA	-9.83495	NA	NA	NA	-14.8172	NA
462	chrI	70255	70329	-	YAL039C	mRNA	SGD	inducible	NA	0.241936	0.436329	1.09823	NA	NA	0.225765	NA	NA	NA	-4.21002	-8.77892	-13.5368	NA	NA	-8.19414	NA	NA
463	chrI	70391	70402	-	YAL039C	mRNA	SGD	inducible	NA	NA	NA	0.572989	NA	NA	NA	NA	NA	NA	NA	NA	-3.0127	NA	NA	NA	NA	NA
464	chrI	70751	70806	-	NA	NA	NA	NA	NA	0.268818	NA	0.334244	NA	NA	NA	0.296957	NA	NA	-2	NA	-8.19306	NA	NA	NA	-8.85956	NA
465	chrI	71450	71522	-	1R-39	XUT	Van_Dijk_2011	NA	3.06798	1.61291	2.26098	11.3882	2.96483	10.9399	1.24171	17.6689	1.50275	-5.83976	-3.97252	0	-12.8588	-8.03027	-10.8242	-5.52136	-14.4969	-8.08417
466	chrI	74483	74570	-	1R-40	XUT	Van_Dijk_2011	NA	NA	NA	NA	0.477491	NA	NA	NA	1.67038	NA	NA	NA	NA	-10.7151	NA	NA	NA	-19.5912	NA
467	chrI	74734	74738	-	NA	NA	NA	NA	NA	NA	NA	NA	NA	NA	NA	0.408316	NA	NA	NA	NA	NA	NA	NA	NA	-1.98806	NA
468	chrI	74831	74862	-	NA	NA	NA	NA	NA	NA	NA	NA	0.323889	NA	NA	NA	0.815053	NA	NA	NA	NA	-3.04705	NA	NA	NA	-8.31718
469	chrI	75287	75303	-	NA	NA	NA	NA	NA	NA	NA	NA	NA	0.239911	NA	NA	NA	NA	NA	NA	NA	NA	-4	NA	NA	NA
470	chrI	75480	75649	-	NA	NA	NA	NA	5.09045	2.47312	2.89564	0.716237	NA	4.24643	2.85969	2.41278	3.54038	-22.3478	-22.6239	-21.8772	-14.9766	NA	-20.9162	-18.6409	-20.1771	-24.4433
471	chrI	75773	75998	-	NA	NA	NA	NA	3.51361	0.967744	2.8163	0.692362	NA	5.46997	5.38074	2.74685	1.98669	-19.7246	-14.8712	-20.7127	-11.5414	NA	-20.1729	-19.338	-19.8852	-18.0278
472	chrI	76054	76066	-	NA	NA	NA	NA	NA	NA	NA	NA	NA	NA	NA	NA	0.280174	NA	NA	NA	NA	NA	NA	NA	NA	-3.39016
473	chrI	76158	76224	-	YAL036C	mRNA	SGD	constitutive	52.7556	60.269	44.4262	23.7552	13.8525	60.7455	51.2111	41.4997	32.8823	-9.20206	-9.24652	-5.53167	-9.48126	-7.87088	-5.25449	-7.75526	-8.75354	-10.4028
474	chrI	77217	77227	-	NA	NA	NA	NA	NA	NA	NA	NA	NA	NA	NA	0.296957	NA	NA	NA	NA	NA	NA	NA	NA	-3.17056	NA
475	chrI	80984	80992	-	NA	NA	NA	NA	NA	NA	NA	1.05048	1.5447	0.479822	NA	1.67038	2.19045	NA	NA	NA	-5.10782	-5.09332	-1.28585	NA	-2.00122	-4.18026
476	chrI	81104	81107	-	NA	NA	NA	NA	NA	NA	0.356996	NA	0.672693	NA	NA	0.371196	0.509408	NA	NA	-1.45546	NA	-1.21124	NA	NA	-1.39681	-1.53892
477	chrI	81158	81632	-	NA	NA	NA	NA	1.19977	2.82259	30.186	19.5771	45.2946	19.8167	15.0134	48.4782	41.9497	-15.1605	-13.5985	-37.1679	-34.0622	-39.6904	-34.7566	-34.541	-41.69	-37.8538
478	chrI	81717	82042	-	YAL034C	mRNA	SGD	constitutive	15.9227	38.8173	82.7834	280.431	174.95	78.7868	75.7819	158.352	151.192	-16.5583	-13.5794	-28.545	-24.1249	-19.3061	-17.7974	-27.1161	-23.9306	-23.4604
479	chrI	82086	82093	-	YAL034C	mRNA	SGD	inducible	NA	NA	0.872657	0.692362	NA	NA	NA	0.742393	0.280174	NA	NA	-1.92712	-2.33643	NA	NA	NA	-2.17291	-2.6548
480	chrI	82261	82294	-	YAL034C	mRNA	SGD	inducible	NA	NA	0.356996	0.644613	NA	0.575787	NA	NA	0.254704	NA	NA	-7.92481	-5.91374	NA	-9.85626	NA	NA	-3.8838
481	chrI	82431	82448	-	YAL034C	mRNA	SGD	inducible	NA	NA	NA	NA	0.423547	0.263902	NA	0.408316	NA	NA	NA	NA	NA	-3.82859	-2.7906	NA	-2.7906	NA
482	chrI	82505	82622	-	YAL034C	mRNA	SGD	constitutive	2.70805	3.33334	8.05225	19.5055	8.69518	7.19733	6.81059	8.57463	6.21478	-13.2578	-14.8332	-16.1879	-14.516	-16.4072	-13.5776	-13.9782	-15.6409	-15.7934
483	chrI	82652	82661	-	YAL034C	mRNA	SGD	inducible	NA	NA	NA	NA	NA	NA	NA	0.482555	NA	NA	NA	NA	NA	NA	NA	NA	-4.99777	NA
484	chrI	82868	82922	-	YAL034C	mRNA	SGD	inducible	NA	NA	NA	0.429742	NA	NA	NA	0.482555	0.203763	NA	NA	NA	-1.45546	NA	NA	NA	-8.50137	-8.55066
485	chrI	83873	83944	-	NA	NA	NA	NA	0.719862	NA	NA	0.596864	1.39521	0.263902	1.05357	0.222718	1.19711	-12.0098	NA	NA	-11.2351	-14.7846	-9.32954	-13.6796	-8.67724	-14.5618
486	chrI	83999	84008	-	NA	NA	NA	NA	1.09693	0.483872	1.07099	1.48022	1.81876	0.623769	1.46747	0.927991	1.06976	-0.877437	-0.764205	0	-0.674399	-0.576291	-0.890492	-0.650022	-0.63431	-0.526617
487	chrI	84073	84090	-	NA	NA	NA	NA	0.565606	NA	0.912323	1.45635	0.946753	0.743724	0.827806	0.668153	1.14617	-3.21328	NA	-2.94503	-2.90734	-5.56409	-3.29945	-2.8082	-5.96421	-5.35584
488	chrI	84169	84301	-	NA	NA	NA	NA	0.942677	0.564518	0.832991	2.33971	4.88325	1.39148	1.35459	2.96957	0.483937	-19.0577	-15.3748	-14.5658	-21.6907	-22.5414	-14.9726	-21.5364	-21.3368	-17.5977
489	chrI	84392	84509	-	YAL032C	mRNA	SGD	constitutive	10.0095	7.28496	25.5451	27.4557	23.8432	11.4438	18.2117	19.6734	16.6067	-12.3603	-11.7459	-13.5415	-14.1363	-11.9915	-15.8818	-14.6959	-16.3664	-12.8796
490	chrI	85437	85445	-	NA	NA	NA	NA	1.30261	NA	2.37997	NA	1.96825	1.94328	1.20408	3.00669	2.98004	0	NA	0	NA	0	0	0	-0.992005	0
491	chrI	85523	85576	-	NA	NA	NA	NA	0.39421	0.403227	0.753658	NA	1.7191	0.407849	0.338648	1.26207	1.24805	-7.70331	-1.45546	-7.69648	NA	-12.5413	-6.70928	-7.49666	-4.64386	-11.3788
492	chrI	85818	85905	-	NA	NA	NA	NA	NA	NA	1.07099	NA	0.323889	NA	NA	0.742393	1.52822	NA	NA	-11.9442	NA	-9.52326	NA	NA	-16.0296	-10.5208
493	chrI	86034	86058	-	NA	NA	NA	NA	NA	NA	0.555327	NA	NA	NA	NA	0.371196	0.458467	NA	NA	-4.1903	NA	NA	NA	NA	-1.9419	-6.56888
494	chrI	86171	86174	-	NA	NA	NA	NA	0.548466	NA	0.515661	1.02661	0.797266	0.695742	NA	1.18783	1.14617	-0.811278	NA	-0.961237	-2.25244	-2.32106	-1.34682	NA	-1.98664	-2.19256
495	chrI	86384	86386	-	NA	NA	NA	NA	0.205675	NA	NA	0.477491	NA	0.335876	0.225765	NA	0.458467	-1	NA	NA	-0.992774	NA	-1	-1	NA	-0.852405
496	chrI	86637	86658	-	NA	NA	NA	NA	0.41135	NA	0.515661	0.859484	0.473376	0.791707	0.451531	0.853751	1.40087	-6.7393	NA	-1.4114	-6.21631	-4.17121	-6.74053	-3.90085	-6.47446	-7.79537
497	chrI	86851	86893	-	NA	NA	NA	NA	NA	NA	0.277664	0.620739	NA	NA	0.263393	0.96511	NA	NA	NA	-3.64578	-4.37366	NA	NA	-3.94091	-10.6686	NA
498	chrI	86956	86958	-	NA	NA	NA	NA	NA	NA	NA	0.26262	NA	NA	NA	NA	NA	NA	NA	NA	-0.99403	NA	NA	NA	NA	NA
499	chrI	86978	87114	-	YAL031C	mRNA	SGD	constitutive	43.1575	40.699	72.5099	122.118	93.8531	82.1935	69.6862	136.786	71.4445	-5.40612	-5.11722	-5.16359	-4.96157	-5.15433	-5.81556	-5.44797	-5.88962	-6.13545
500	chrI	87709	87763	-	YAL031C	mRNA	SGD	inducible	NA	NA	NA	NA	NA	NA	NA	1.11359	NA	NA	NA	NA	NA	NA	NA	NA	-10.4537	NA
501	chrI	88257	88296	-	NA	NA	NA	NA	0.274233	0.322581	0.475995	NA	NA	NA	NA	0.334077	NA	-3.9548	-4	-6.48289	NA	NA	NA	NA	-3.96881	NA
502	chrI	88713	88732	-	NA	NA	NA	NA	NA	NA	NA	NA	NA	NA	NA	NA	0.229234	NA	NA	NA	NA	NA	NA	NA	NA	-4.21002
503	chrI	89278	89366	-	NA	NA	NA	NA	1.78252	0.994626	2.65764	NA	1.3703	3.21481	0.677296	2.41278	1.42634	-10.0434	-15.5432	-12.559	NA	-7.37514	-15.6257	-13.0464	-12.2132	-10.4244
504	chrI	89445	89533	-	NA	NA	NA	NA	1.98819	1.61291	3.88729	NA	1.69419	3.02288	0.940689	3.30365	1.75746	-17.0626	-15.1103	-17.1924	NA	-15.5178	-19.5348	-8.30041	-18.6243	-15.3076
505	chrI	89631	89651	-	NA	NA	NA	NA	0.39421	NA	0.475995	NA	0.348804	NA	NA	0.668153	NA	-4.19565	NA	-0.918296	NA	-3.99427	NA	NA	-3.62096	NA
506	chrI	89733	89739	-	NA	NA	NA	NA	0.651304	NA	1.03132	NA	0.672693	0.86368	0.564413	0.96511	0.687701	-2.3056	NA	-2.39749	NA	-2.48476	-2.43944	-5.14381	-4.76951	-2.37941
507	chrI	89802	89803	-	NA	NA	NA	NA	NA	NA	NA	NA	NA	NA	NA	1.00223	NA	NA	NA	NA	NA	NA	NA	NA	0	NA
508	chrI	89878	89895	-	NA	NA	NA	NA	NA	0.322581	0.753658	NA	0.722522	1.03162	0.413903	1.00223	NA	NA	-0.918296	-5.24972	NA	-0.797327	-5.01344	-0.845351	-5.91299	NA
509	chrI	90063	90099	-	NA	NA	NA	NA	0.599885	0.2957	NA	NA	NA	0.719733	NA	1.29919	NA	-0.970951	-0.94566	NA	NA	NA	-6.60757	NA	-6.72504	NA
510	chrI	90662	90681	-	NA	NA	NA	NA	NA	NA	NA	NA	NA	NA	NA	0.259837	NA	NA	NA	NA	NA	NA	NA	NA	-4.18518	NA
511	chrI	91036	91048	-	NA	NA	NA	NA	0.839839	0.645163	1.46765	NA	0.797266	0.935653	0.376275	1.67038	0.534878	-5.0659	-6.85001	-1.38523	NA	-1.10347	-5.10111	-1.53892	-1.51595	-1.51952
512	chrI	91537	91558	-	NA	NA	NA	NA	0.994095	0.725808	1.18999	0.907233	1.51979	2.23117	0.639668	1.81886	1.22258	-1.55081	-1.58339	-1.39681	-5.69189	-1.32879	-5.56302	-1.06556	-5.95219	-5.55274
513	chrI	91794	91831	-	NA	NA	NA	NA	0.651304	NA	NA	0.811735	NA	1.12758	NA	0.259837	NA	-1.73608	NA	NA	-5.74354	NA	0	NA	-5.89241	NA
514	chrI	92136	92325	-	YAL029C	mRNA	SGD	constitutive	7.4043	5.53765	14.3592	16.0676	10.8877	24.8548	8.27806	35.375	10.5702	-27.4585	-27.6947	-30.4312	-28.8974	-28.2321	-30.8749	-27.8162	-30.3001	-27.802
515	chrI	92375	92404	-	YAL029C	mRNA	SGD	constitutive	4.61055	8.33335	17.0168	17.4284	11.7846	34.8111	16.6314	21.0097	4.38091	-9.99742	-10.4505	-10.4688	-9.40151	-10.9986	-10.8167	-11.1671	-10.5273	-11.4004
516	chrI	92440	92573	-	YAL029C	mRNA	SGD	constitutive	104.191	81.2368	51.8041	109.799	57.6024	57.4827	41.7289	65.9616	49.6673	-21.8031	-22.5736	-23.9447	-22.2268	-21.5495	-23.7316	-23.7171	-22.5547	-24.292
517	chrI	94819	94844	-	NA	NA	NA	NA	NA	NA	NA	NA	NA	NA	NA	0.556794	NA	NA	NA	NA	NA	NA	NA	NA	-7.36034	NA
518	chrI	95771	95877	-	YAL026C-A	mRNA	SGD	inducible	1.86821	3.33334	4.08562	NA	1.17098	2.78297	0.564413	1.67038	2.80174	-19.9976	-20.2569	-20.3775	NA	-14.9004	-18.4438	-16.8508	-19.0064	-17.8031
519	chrI	95956	95959	-	YAL026C-A	mRNA	SGD	inducible	NA	NA	NA	NA	NA	NA	NA	0.222718	NA	NA	NA	NA	NA	NA	NA	NA	-1.58496	NA
520	chrI	96290	96293	-	YAL026C-A	mRNA	SGD	inducible	NA	NA	NA	NA	NA	0.623769	0.602041	0.445436	NA	NA	NA	NA	NA	NA	-1.23524	-1.10347	-1.28585	NA
521	chrI	97199	97216	-	NA	NA	NA	NA	NA	NA	NA	NA	NA	0.743724	NA	NA	0.356586	NA	NA	NA	NA	NA	-3.93582	NA	NA	-3.84338
522	chrI	97396	97440	-	NA	NA	NA	NA	NA	NA	0.396662	NA	NA	0.983635	0.30102	0.853751	0.432997	NA	NA	-8.14882	NA	NA	-8.68353	-3.02548	-12.4755	-6.97918
523	chrI	97577	97580	-	NA	NA	NA	NA	NA	NA	NA	NA	NA	NA	NA	0.259837	NA	NA	NA	NA	NA	NA	NA	NA	-1.56155	NA
524	chrI	97698	97700	-	NA	NA	NA	NA	NA	NA	NA	NA	NA	NA	NA	0.259837	NA	NA	NA	NA	NA	NA	NA	NA	-0.985228	NA
525	chrI	98706	98710	-	NA	NA	NA	NA	NA	NA	NA	NA	NA	0.455831	NA	0.556794	0.585819	NA	NA	NA	NA	NA	-1.31786	NA	-2.17291	-0.666578
526	chrI	99157	99178	-	NA	NA	NA	NA	1.83393	0.913981	2.85597	2.07709	0.647778	4.27042	1.919	2.82109	3.15833	-0.996911	-0.977418	-0.964079	-0.988437	-0.995727	-0.959458	-0.988699	-0.937456	-0.996995
527	chrI	99231	99316	-	NA	NA	NA	NA	NA	NA	0.436329	NA	NA	0.64776	NA	NA	NA	NA	NA	-10.4528	NA	NA	-10.5578	NA	NA	NA
528	chrI	99367	99369	-	NA	NA	NA	NA	NA	NA	NA	NA	NA	NA	NA	0.631034	0.789582	NA	NA	NA	NA	NA	NA	NA	-0.873981	-0.554778
529	chrI	99561	99655	-	NA	NA	NA	NA	6.73585	2.58065	9.2819	8.37997	2.84026	10.6281	6.58482	6.16186	9.24575	-8.75523	-8.62755	-12.2038	-11.2545	-7.92724	-10.7858	-8.86928	-12.5907	-10.7458
530	chrI	99722	99827	-	YAL026C	mRNA	SGD	constitutive	78.585	92.4196	108.566	68.711	49.0817	106.928	87.8227	85.4123	97.8572	-0.980594	-2.44402	-0.797951	-0.828659	-4.66589	-1.97698	-4.20816	-2.40559	-1.39602
531	chrI	100434	100701	-	NA	NA	NA	NA	9.37535	4.35485	13.0502	NA	0.249145	6.83747	7.60076	4.71419	5.19596	-31.6583	-27.8607	-33.3333	NA	-17.6956	-29.4554	-30.9812	-26.4026	-30.5834
532	chrI	100723	100797	-	NA	NA	NA	NA	8.07274	4.05915	10.3132	1.1221	0.722522	6.18971	8.84247	5.6793	5.39972	-10.2183	-11.1975	-12.8356	-10.5104	-8.93953	-12.0023	-11.6019	-11.2652	-10.3945
533	chrI	100830	101054	-	NA	NA	NA	NA	1.97105	NA	7.06059	NA	NA	3.59867	3.80038	2.96957	1.68105	-17.6155	NA	-26.8978	NA	NA	-18.0523	-25.1666	-22.5125	-22.8782
534	chrI	101114	101225	-	YAL025C	mRNA	SGD	constitutive	70.1009	59.1399	83.1801	18.2163	16.8671	60.4576	110.625	55.6052	47.4768	-7.39142	-6.14977	-5.45577	-6.8467	-7.56477	-7.16461	-4.90959	-6.99933	-7.60522
535	chrI	102780	102798	-	NA	NA	NA	NA	NA	NA	0.356996	NA	NA	NA	NA	0.222718	NA	NA	NA	-4.05099	NA	NA	NA	NA	-1	NA
536	chrI	103089	103091	-	NA	NA	NA	NA	NA	NA	0.63466	NA	NA	NA	NA	NA	0.432997	NA	NA	-0.811278	NA	NA	NA	NA	NA	-0.873981
537	chrI	103528	103541	-	NA	NA	NA	NA	NA	NA	0.832991	NA	NA	NA	NA	0.556794	0.280174	NA	NA	-3.86118	NA	NA	NA	NA	-7.27357	-1.89132
538	chrI	103709	103783	-	NA	NA	NA	NA	NA	0.215054	NA	NA	NA	NA	NA	0.556794	0.203763	NA	-4.24793	NA	NA	NA	NA	NA	-11.4149	-4.16993
539	chrI	104020	104024	-	NA	NA	NA	NA	NA	NA	0.515661	NA	NA	NA	NA	0.334077	0.203763	NA	NA	-3.09716	NA	NA	NA	NA	-0.918296	-1
540	chrI	105250	105264	-	NA	NA	NA	NA	NA	NA	0.475995	NA	NA	NA	NA	0.259837	NA	NA	NA	-3.08882	NA	NA	NA	NA	-0.985228	NA
541	chrI	105614	105629	-	NA	NA	NA	NA	NA	NA	NA	NA	NA	NA	NA	0.371196	NA	NA	NA	NA	NA	NA	NA	NA	-6.13753	NA
542	chrI	105721	106009	-	YAL024C	mRNA	SGD	constitutive	11.175	13.5753	34.1526	26.1665	7.47436	25.0947	17.2334	34.744	20.5037	-12.508	-11.9968	-17.6338	-17.9677	-12.1711	-18.0244	-16.6681	-23.7257	-15.8669
543	chrI	106594	106597	-	NA	NA	NA	NA	NA	NA	0.674326	NA	0.398633	0.839689	1.20408	0.519675	0.840523	NA	NA	-1.24757	NA	-1.51274	-0.937779	0	-1.36801	-0.844524
544	chrI	106979	107064	-	NA	NA	NA	NA	0.617025	0.510754	1.30899	NA	NA	0.791707	0.903061	0.519675	0.942405	-12.367	-8.55087	-8.12557	NA	NA	-11.5592	-7.99066	-7.76571	-13.622
545	chrI	107224	107260	-	NA	NA	NA	NA	1.33689	NA	2.10231	NA	NA	2.11122	1.01594	NA	1.27352	0	NA	0	NA	NA	-1.44434	0	NA	0
546	chrI	107313	107601	-	NA	NA	NA	NA	2.72519	1.29033	5.83094	0.429742	NA	5.49396	4.40242	1.41055	2.7508	-26.0021	-23.4243	-25.6935	-7.13233	NA	-25.6469	-27.1549	-20.2095	-25.4155
547	chrI	107675	107888	-	NA	NA	NA	NA	2.69091	0.698927	5.83094	NA	0.647778	3.67064	4.06378	3.08093	1.57916	-17.3892	-8.98914	-21.8727	NA	-11.7864	-19.6048	-25.5285	-24.0012	-12.442
548	chrI	107959	107998	-	NA	NA	NA	NA	NA	NA	0.515661	4.3213	NA	1.29552	0.263393	2.89533	0.331115	NA	NA	-7.22853	-0.872333	NA	-3.20914	-2.76589	-0.962615	-2.06766
549	chrI	108164	108187	-	NA	NA	NA	NA	NA	NA	NA	NA	NA	NA	0.677296	NA	NA	NA	NA	NA	NA	NA	NA	-6.40206	NA	NA
550	chrI	108585	108718	-	YAL023C	mRNA	SGD	constitutive	19.3163	28.1184	51.8438	23.9223	12.831	37.9299	37.5523	31.96	15.4096	-21.6076	-21.5589	-19.128	-17.17	-20.1219	-19.3824	-20.3202	-17.7822	-21.0439
551	chrI	109541	109544	-	NA	NA	NA	NA	NA	NA	NA	NA	NA	0.263902	NA	NA	NA	NA	NA	NA	NA	NA	-1.5755	NA	NA	NA
552	chrI	109699	109702	-	NA	NA	NA	NA	NA	NA	0.237997	NA	NA	NA	NA	NA	NA	NA	NA	-1.58496	NA	NA	NA	NA	NA	NA
553	chrI	110362	110505	-	YAL022C	mRNA	SGD	constitutive	11.2607	12.7151	14.6765	10.6242	7.25013	11.1079	12.0032	12.5093	12.9899	-14.2973	-14.0082	-17.7915	-20.3689	-13.8628	-15.5248	-15.4844	-18.1675	-15.591
554	chrI	110924	110988	-	NA	NA	NA	NA	NA	0.779572	6.4656	NA	0.473376	2.78297	2.74681	3.41501	3.38756	NA	-10.8665	-13.7218	NA	-6.86765	-14.0772	-11.8998	-16.2318	-15.9405
555	chrI	111278	111297	-	NA	NA	NA	NA	NA	NA	0.475995	NA	NA	NA	0.225765	NA	NA	NA	NA	-6.60377	NA	NA	NA	-2	NA	NA
556	chrI	111542	111565	-	NA	NA	NA	NA	NA	NA	0.515661	NA	NA	NA	NA	NA	NA	NA	NA	-7.13194	NA	NA	NA	NA	NA	NA
557	chrI	111768	111771	-	NA	NA	NA	NA	NA	NA	NA	NA	NA	NA	NA	0.296957	NA	NA	NA	NA	NA	NA	NA	NA	-1.51274	NA
558	chrI	111970	111981	-	NA	NA	NA	NA	NA	NA	NA	1.05048	NA	NA	NA	0.445436	NA	NA	NA	NA	-5.20047	NA	NA	NA	-3.17678	NA
559	chrI	112083	112100	-	NA	NA	NA	NA	NA	NA	NA	NA	NA	NA	NA	0.334077	0.66223	NA	NA	NA	NA	NA	NA	NA	-3.58768	-0.981698
560	chrI	112162	112234	-	NA	NA	NA	NA	NA	NA	NA	1.5041	NA	0.239911	NA	0.408316	NA	NA	NA	NA	-15.1855	NA	-9.61452	NA	-10.0247	NA
561	chrI	112457	112615	-	NA	NA	NA	NA	NA	NA	2.73697	1.24148	NA	1.58341	0.639668	1.29919	1.04429	NA	NA	-13.3783	-10.994	NA	-15.65	-11.0684	-10.017	-11.7709
562	chrI	112706	113037	-	NA	NA	NA	NA	0.531327	0.483872	11.7015	3.67668	2.69077	9.26057	6.84821	8.20344	4.53373	-11.6019	-11.6656	-25.4668	-14.6535	-15.7878	-20.5936	-18.4902	-27.2705	-18.8213
563	chrI	113120	113305	-	NA	NA	NA	NA	1.11407	1.10215	17.1755	10.0512	2.11774	11.1079	8.42857	9.02007	9.90798	-9.61664	-12.9592	-20.0696	-14.5095	-12.3091	-16.4185	-16.9097	-14.528	-14.2762
564	chrI	113335	113433	-	YAL021C	mRNA	SGD	constitutive	23.2584	43.9248	211.262	194.673	67.1945	151.216	126.316	173.831	135.273	-12.0767	-10.6726	-10.768	-11.7499	-10.9498	-10.5757	-9.91486	-11.9565	-12.8745
565	chrI	113535	113543	-	YAL021C	mRNA	SGD	inducible	NA	NA	NA	NA	NA	NA	NA	0.482555	NA	NA	NA	NA	NA	NA	NA	NA	-2.98718	NA
566	chrI	114056	114101	-	NA	NA	NA	NA	NA	NA	NA	1.09823	NA	NA	0.413903	1.22495	NA	NA	NA	NA	-9.6387	NA	NA	-7.47765	-10.6889	NA
567	chrI	114274	114298	-	NA	NA	NA	NA	NA	NA	NA	0.668488	NA	NA	NA	NA	0.254704	NA	NA	NA	-8.86984	NA	NA	NA	NA	-2.50987
568	chrI	114417	114691	-	YAL020C	mRNA	SGD	constitutive	16.454	21.2097	23.6411	51.9033	21.1275	21.3761	20.2812	36.8969	35.302	-22.499	-20.8813	-24.1685	-24.9994	-20.9307	-25.8637	-23.0742	-24.2874	-25.6198
569	chrI	114816	114857	-	YAL020C	mRNA	SGD	inducible	NA	NA	NA	NA	NA	NA	NA	0.222718	1.06976	NA	NA	NA	NA	NA	NA	NA	-3.58496	-7.73683
570	chrI	118763	118800	-	NA	NA	NA	NA	NA	NA	NA	3.39019	NA	NA	NA	0.927991	NA	NA	NA	NA	-8.29957	NA	NA	NA	-4.52336	NA
571	chrI	119561	119584	-	YAL018C	mRNA	SGD	inducible	NA	NA	NA	NA	NA	NA	NA	0.890871	NA	NA	NA	NA	NA	NA	NA	NA	-8.95606	NA
572	chrI	119961	119964	-	YAL018C	mRNA	SGD	inducible	NA	NA	NA	NA	NA	NA	NA	0.259837	NA	NA	NA	NA	NA	NA	NA	NA	-1.56155	NA
573	chrI	120106	120172	-	YAL018C	mRNA	SGD	inducible	NA	NA	0.237997	0.763986	NA	NA	NA	3.82332	NA	NA	NA	-3.16993	-2.7171	NA	NA	NA	-11.8706	NA
574	chrI	120226	120253	-	YAL018C	mRNA	SGD	inducible	NA	NA	NA	NA	NA	NA	NA	0.927991	NA	NA	NA	NA	NA	NA	NA	NA	-9.18758	NA
575	chrI	120316	120337	-	YAL018C	mRNA	SGD	inducible	NA	NA	NA	NA	NA	NA	NA	0.742393	NA	NA	NA	NA	NA	NA	NA	NA	-5.61733	NA
576	chrI	124993	125087	-	NA	NA	NA	NA	NA	NA	NA	4.94203	NA	0.839689	NA	5.45659	1.32446	NA	NA	NA	-17.5219	NA	-15.9214	NA	-20.4164	-16.544
577	chrI	126029	126036	-	YAL016C-A	mRNA	SGD	inducible	NA	NA	NA	NA	NA	NA	NA	NA	0.356586	NA	NA	NA	NA	NA	NA	NA	NA	-2.63972
578	chrI	126988	127032	-	NA	NA	NA	NA	NA	0.241936	1.15032	NA	0.348804	1.22355	0.790178	NA	0.66223	NA	-8.60746	-11.6116	NA	-8.59496	-14.0622	-13.3543	NA	-10.3849
579	chrI	127089	127220	-	NA	NA	NA	NA	2.2967	2.28495	4.56162	0.811735	2.915	3.02288	3.91326	3.56348	5.55255	-15.7506	-9.14647	-22.8629	-15.4213	-16.2351	-16.0561	-16.7237	-20.6645	-21.7878
580	chrI	127272	127406	-	NA	NA	NA	NA	0.445629	0.268818	0.753658	NA	0.872009	0.407849	1.05357	0.779512	1.24805	-16.8512	-9.54523	-16.92	NA	-18.8747	-11.4199	-17.0073	-18.9217	-19.7326
581	chrI	127545	127593	-	NA	NA	NA	NA	NA	1.04839	0.515661	NA	0.473376	NA	1.0912	NA	0.738641	NA	-2.18686	-7.20376	NA	-1.93062	NA	-14.1272	NA	-10.9065
582	chrI	127643	127791	-	NA	NA	NA	NA	1.18263	1.61291	2.22131	0.716237	2.93992	1.48745	2.10714	3.30365	3.05645	-14.3178	-19.9323	-16.8661	-14.6211	-20.4323	-14.7936	-20.8809	-23.7118	-23.35
583	chrI	127875	128102	-	YAL015C	mRNA	SGD	constitutive	22.7785	12.1237	19.1191	14.3964	28.1534	18.1853	24.9471	33.816	24.3242	-15.085	-21.7576	-20.4222	-25.7441	-26.5086	-21.6512	-26.8908	-23.1302	-23.9879
584	chrI	128452	128488	-	YAL015C	mRNA	SGD	inducible	NA	NA	NA	NA	NA	NA	NA	1.74462	NA	NA	NA	NA	NA	NA	NA	NA	-5.93855	NA
585	chrI	128634	128676	-	NA	NA	NA	NA	NA	NA	0.793325	NA	NA	0.86368	0.489158	0.668153	0.789582	NA	NA	-6.62438	NA	NA	-6.66108	-6.80614	-6.50697	-5.68075
586	chrI	128758	129118	-	YAL014C	mRNA	SGD	constitutive	44.8714	42.8496	59.4597	72.8652	66.4222	55.0596	57.3444	68.0403	63.676	-17.0049	-17.3297	-18.5248	-16.1269	-18.1067	-17.8704	-19.1184	-16.4381	-20.8151
587	chrI	130441	130476	-	NA	NA	NA	NA	0.497048	0.376345	0.436329	NA	NA	1.12758	0.790178	0.371196	NA	-1.6995	-3.66647	-1.6907	NA	NA	-3.73255	-7.39215	-3.80735	NA
588	chrI	131931	131935	-	NA	NA	NA	NA	NA	NA	NA	NA	NA	0.287893	NA	NA	NA	NA	NA	NA	NA	NA	-2	NA	NA	NA
589	chrI	131998	132012	-	NA	NA	NA	NA	NA	NA	NA	1.93384	0.249145	NA	NA	NA	0.764112	NA	NA	NA	-5.15498	-2.80735	NA	NA	NA	-5.45661
590	chrI	134925	134946	-	NA	NA	NA	NA	NA	NA	NA	NA	NA	NA	NA	0.296957	NA	NA	NA	NA	NA	NA	NA	NA	-4.19218	NA
591	chrI	135364	135377	-	NA	NA	NA	NA	NA	NA	0.356996	NA	NA	0.407849	NA	1.41055	NA	NA	NA	-1.83659	NA	NA	-1.99501	NA	-5.23885	NA
592	chrI	135575	135730	-	YAL010C	mRNA	SGD	constitutive	25.418	23.0915	36.8896	40.2525	49.2561	34.7151	26.9037	43.133	32.1946	-15.0304	-11.7789	-16.5492	-11.1658	-11.0917	-12.6346	-14.74	-14.7957	-14.3559
593	chrI	136639	136707	-	NA	NA	NA	NA	NA	NA	0.237997	NA	0.672693	NA	NA	1.26207	NA	NA	NA	-2	NA	-2.82789	NA	NA	-14.775	NA
594	chrI	137469	137488	-	NA	NA	NA	NA	NA	0.376345	NA	NA	NA	0.599778	NA	0.408316	NA	NA	-3.76114	NA	NA	NA	-1.44386	NA	-5.8194	NA
595	chrI	137974	138052	-	NA	NA	NA	NA	6.77013	3.5484	2.65764	1.09823	1.84368	4.94217	3.42411	1.18783	3.10739	-13.8899	-11.6666	-13.187	-3.49366	-2.10835	-10.9207	-10.2256	-11.315	-11.8121
596	chrI	138111	138345	-	NA	NA	NA	NA	12.8033	4.16668	9.1629	2.5307	4.36005	10.2202	9.78316	5.53082	6.87701	-16.1439	-17.8347	-18.63	-12.5707	-19.7235	-17.1773	-16.4239	-21.4739	-17.6192
597	chrI	138350	138479	-	YAL007C	mRNA	SGD	constitutive	201.887	175.968	250.215	62.2171	97.2913	191.713	167.744	130.81	122.385	-11.6299	-12.2708	-11.3227	-12.562	-13.1267	-12.2869	-10.8901	-12.6439	-16.3073
598	chrI	138952	139053	-	YAL007C	mRNA	SGD	inducible	2.02247	0.2957	NA	1.07436	3.51295	1.31951	0.940689	2.30142	0.942405	-15.9352	-12.9546	NA	-15.9884	-18.2787	-3.48542	-15.7353	-12.504	-12.2865
599	chrI	139722	139787	-	NA	NA	NA	NA	0.599885	0.268818	1.70565	NA	0.323889	1.29552	1.0912	1.41055	1.75746	-10.6179	-2	-13.2314	NA	-1.92247	-10.3829	-15.5108	-15.7902	-12.5919
600	chrI	140142	140239	-	NA	NA	NA	NA	5.33041	1.58603	8.25058	3.36631	5.23206	6.50159	3.6875	4.52859	10.774	-11.0154	-10.0508	-10.0502	-6.78101	-9.85512	-9.75691	-7.42128	-13.3589	-9.91486
601	chrI	140460	140533	-	NA	NA	NA	NA	5.55322	1.90861	12.7725	3.24694	7.34979	9.35653	4.74107	7.27545	12.022	-14.2921	-9.3503	-22.464	-16.3571	-18.8555	-18.0924	-16.7726	-19.4108	-19.5781
602	chrI	140648	140719	-	NA	NA	NA	NA	9.0497	3.46775	16.3425	8.69034	8.69518	13.483	6.58482	7.31257	18.5679	-8.4741	-3.41162	-8.10001	-6.06967	-8.80602	-6.82886	-6.06515	-12.2501	-6.90625
604	chrI	141180	141678	-	YAL005C	mRNA	SGD	constitutive	4205.45	1972.64	8494.25	4741.51	2945.35	6308.94	2618.99	4451.24	7538.65	-5.63361	-5.62269	-6.13923	-7.66185	-5.97079	-6.42811	-7.29031	-6.37131	-5.64894
605	chrI	141929	142002	-	YAL005C	mRNA	SGD	inducible	NA	NA	NA	NA	NA	NA	NA	1.93022	NA	NA	NA	NA	NA	NA	NA	NA	-16.7172	NA
606	chrI	142062	142109	-	YAL005C	mRNA	SGD	inducible	0.257094	NA	NA	0.620739	NA	1.46346	0.451531	2.41278	NA	-0.970951	NA	NA	-6.49199	NA	-6.07036	-2.93961	-15.402	NA
607	chrI	142181	142191	-	YAL005C	mRNA	SGD	inducible	NA	NA	NA	NA	NA	NA	NA	1.07647	NA	NA	NA	NA	NA	NA	NA	NA	-1.59397	NA
608	chrI	143311	143367	-	NA	NA	NA	NA	NA	NA	NA	NA	NA	0.767715	NA	0.222718	NA	NA	NA	NA	NA	NA	-3.49351	NA	-3.80735	NA
609	chrI	143741	143781	-	NA	NA	NA	NA	NA	0.860217	0.872657	1.28923	1.3703	NA	1.88138	2.04158	3.10739	NA	-5.97963	-5.0577	-1.64472	-3.65921	NA	-4.88197	0	-7.12352
610	chrI	148050	148070	-	NA	NA	NA	NA	NA	NA	NA	NA	0.298975	NA	NA	NA	NA	NA	NA	NA	NA	-4.23492	NA	NA	NA	NA
611	chrI	148692	148694	-	NA	NA	NA	NA	0.222814	NA	NA	NA	NA	NA	NA	0.482555	NA	-0.995727	NA	NA	NA	NA	NA	NA	-0.890492	NA
612	chrI	148900	148907	-	NA	NA	NA	NA	NA	NA	0.356996	NA	NA	NA	NA	NA	0.203763	NA	NA	-4.44955	NA	NA	NA	NA	NA	-1
613	chrI	149176	149289	-	NA	NA	NA	NA	0.462769	0.510754	3.21297	NA	0.996582	2.80696	0.263393	2.74685	0.560349	-7.3788	-9.35314	-19.8395	NA	-13.0905	-19.3862	-9.78347	-20.6678	-6.65397
614	chrI	149370	149377	-	NA	NA	NA	NA	NA	NA	2.73697	NA	1.49487	2.59104	1.05357	2.2643	2.08857	NA	NA	-0.852934	NA	-0.519703	0	-0.491237	-0.439497	0
615	chrI	149444	149459	-	NA	NA	NA	NA	NA	NA	1.15032	NA	1.66927	1.03162	0.639668	1.41055	0.865993	NA	NA	-0.479832	NA	-0.715322	-0.583019	-2.55966	-0.742488	-1.98957
616	chrI	149745	149797	-	NA	NA	NA	NA	0.514187	0.2957	1.74531	0.310369	1.07133	1.17556	0.451531	2.22718	0.916934	-11.0578	-8.1559	-12.7812	-8.10293	-12.7737	-10.6849	-12.5509	-10.7164	-10.3371
617	chrI	149912	149914	-	NA	NA	NA	NA	0.445629	NA	0.555327	0.572989	0.697607	0.887671	NA	0.519675	0.63676	-0.982859	NA	-0.940286	-0.994985	-0.940286	-0.800392	NA	-0.863121	-0.970951
618	chrI	150140	150242	-	NA	NA	NA	NA	1.02837	NA	2.22131	1.16985	1.86859	2.30315	0.865434	1.63326	1.40087	-2.83555	NA	-12.4828	-3.95723	-0.666578	-12.7123	-11.1885	-10.9619	-8.60915
619	chrI	150298	150384	-	NA	NA	NA	NA	NA	0.322581	1.11065	NA	0.448462	0.719733	NA	1.5219	0.942405	NA	-9.68343	-14.3119	NA	-9.53684	-12.1499	NA	-16.0739	-13.6214
620	chrI	150490	150597	-	NA	NA	NA	NA	1.50828	1.82796	4.00629	3.39019	2.34197	4.51033	2.48342	4.08316	4.04979	-12.8568	-20.993	-13.8252	-20.4448	-12.0032	-13.225	-12.8624	-16.3604	-16.7819
621	chrI	150653	150722	-	NA	NA	NA	NA	0.565606	1.37097	1.58665	1.93384	NA	2.25516	1.65561	2.4499	1.60463	-10.3383	-16.6106	-13.0312	-14.2662	NA	-13.5099	-16.0468	-20.408	-14.2368
622	chrI	150788	150937	-	NA	NA	NA	NA	NA	NA	1.82465	1.5996	0.373718	1.19956	0.978316	4.343	1.06976	NA	NA	-17.803	-18.4766	-9.4149	-18.4779	-16.7608	-24.7045	-15.7472
623	chrI	150981	151021	-	NA	NA	NA	NA	0.497048	0.403227	1.03132	0.644613	0.772351	1.10359	0.451531	2.4499	0.967875	-0.849751	-0.918296	-4.98099	-9.47008	-10.275	-2.85015	-9.30838	-15.0004	-5.47935
624	chrI	151097	151112	-	NA	NA	NA	NA	0.531327	0.268818	NA	0.429742	0.473376	0.695742	0.526786	NA	0.483937	-5.97456	-0.970951	NA	-0.991076	-0.949452	-0.893571	-2.85398	NA	-0.949452
625	chrI	151124	151275	-	YAL001C	mRNA	SGD	constitutive	57.0748	73.0378	86.4724	120.758	84.1364	122.259	82.2538	102.153	69.6106	-11.6585	-10.999	-9.70227	-9.7511	-11.3274	-9.18293	-10.606	-9.51774	-11.4446
626	chrI	151989	152063	-	YAL001C	mRNA	SGD	inducible	0.428489	0.241936	NA	NA	NA	0.623769	NA	0.705273	0.407526	-11.5758	-8.85668	NA	NA	NA	-2.96726	NA	-11.4672	-3.53183
627	chrI	154269	154541	-	NA	NA	NA	NA	9.82098	3.81721	3.76829	1.71897	1.94333	5.32603	5.07972	2.41278	2.80174	-30.5005	-28.8055	-28.4386	-17.359	-23.209	-27.4386	-29.2467	-23.9302	-24.9789
628	chrI	154606	154802	-	YAR002C-A	mRNA	SGD	constitutive	193.283	147.635	152.239	71.9341	70.0099	152.2	136.626	98.1443	59.5752	-7.91256	-6.41213	-6.48187	-6.24523	-5.74807	-6.42288	-6.15359	-6.94695	-9.55865
629	chrI	157102	157136	-	NA	NA	NA	NA	NA	NA	0.555327	NA	NA	NA	NA	NA	NA	NA	NA	-9.96731	NA	NA	NA	NA	NA	NA
630	chrI	157213	157328	-	NA	NA	NA	NA	NA	0.2957	4.24429	NA	NA	0.959644	0.376275	1.5219	0.687701	NA	-3.14142	-20.1053	NA	NA	-14.5208	-9.49027	-19.108	-15.118
631	chrI	157380	157400	-	NA	NA	NA	NA	NA	NA	1.03132	NA	NA	0.455831	NA	NA	NA	NA	NA	-4.77838	NA	NA	-3.3259	NA	NA	NA
632	chrI	157609	157712	-	NA	NA	NA	NA	NA	NA	NA	3.29469	NA	1.29552	NA	0.853751	NA	NA	NA	NA	-20.8262	NA	-13.7749	NA	-10.855	NA
633	chrI	157831	158018	-	NA	NA	NA	NA	2.43382	0.913981	13.0105	NA	1.46996	3.21481	1.16645	5.8649	4.04979	-20.5081	-17.2623	-21.7762	NA	-21.3334	-18.7071	-20.9804	-22.4056	-22.7137
634	chrI	158093	158219	-	NA	NA	NA	NA	1.52542	NA	10.1546	0.787861	NA	4.53432	0.790178	2.56125	6.6223	-12.5609	NA	-22.0239	-18.4289	NA	-18.8923	-10.7002	-18.2616	-21.1866
635	chrI	158281	158594	-	NA	NA	NA	NA	3.61645	0.940863	11.8999	1.05048	0.896924	6.71751	4.47768	5.60506	6.26572	-21.9613	-23.9987	-26.338	-16.9877	-19.2785	-23.2409	-20.681	-27.303	-23.0115
636	chrI	158636	158712	-	YAR007C	mRNA	SGD	constitutive	13.8316	20.3495	49.1465	12.8445	11.8842	25.3586	20.5823	20.49	23.662	-16.0814	-15.9726	-15.4938	-11.0167	-13.5685	-13.0103	-15.2647	-13.2511	-16.1979
637	chrI	161340	161395	-	YARCTy1-1	LTR_retrotransposon	SGD	NA	NA	NA	2.30064	0.334244	1.94333	0.64776	1.24171	2.93245	0.764112	NA	NA	-13.5448	-3.58	-17.656	-4.83804	-15.8171	-19.354	-13.1884
638	chrI	164038	164105	-	YARCTy1-1	LTR_retrotransposon	SGD	NA	1.35403	NA	6.26727	NA	2.76551	1.53543	2.44579	5.49371	0.840523	-14.2446	NA	-18.8767	NA	-14.4836	-9.81647	-12.3306	-15.9694	-11.5571
639	chrI	167051	167084	-	NA	NA	NA	NA	NA	NA	0.475995	NA	NA	NA	0.30102	0.334077	0.560349	NA	NA	-6.76236	NA	NA	NA	-6.40206	-7.5262	-9.83387
640	chrI	167376	167388	-	NA	NA	NA	NA	2.39954	0.75269	2.02298	0.644613	1.0215	1.51144	1.42985	1.11359	1.65558	-0.974976	-0.985228	-0.897427	-2.39147	0	-0.999818	-0.512709	-0.721928	-0.829059
641	chrI	167461	167588	-	NA	NA	NA	NA	1.30261	0.564518	1.78498	NA	NA	0.86368	NA	1.29919	1.42634	-15.0077	-6.56811	-18.0517	NA	NA	-13.8237	NA	-14.8819	-16.6782
642	chrI	167752	167760	-	NA	NA	NA	NA	1.6454	NA	1.94365	NA	NA	1.10359	NA	1.03935	1.34993	0	NA	0	NA	NA	0	NA	-1.47371	-0.509516
643	chrI	167934	167991	-	NA	NA	NA	NA	2.87945	0.618281	4.08562	NA	NA	2.4231	1.12883	2.2643	2.67439	-13.144	-9.10242	-14.1984	NA	NA	-10.7342	-8.55713	-10.7505	-15.8369
644	chrI	168134	168167	-	NA	NA	NA	NA	4.86764	1.34409	3.72863	1.57572	1.27064	4.46235	2.33291	3.00669	4.48279	-2.39958	-2.61355	-4.41556	-0.487918	0	-2.62727	-3.90425	-1.03888	-1.89232
645	chrI	168215	168225	-	NA	NA	NA	NA	NA	NA	0.237997	0.286495	NA	NA	NA	0.445436	0.203763	NA	NA	-3.16993	-3.10611	NA	NA	NA	-6.64386	-3.16993
646	chrI	168357	168375	-	NA	NA	NA	NA	NA	NA	NA	NA	NA	NA	0.30102	0.482555	NA	NA	NA	NA	NA	NA	NA	-3.97992	-8.28887	NA
647	chrI	168476	168553	-	NA	NA	NA	NA	1.18263	NA	1.94365	1.83834	NA	1.48745	0.413903	2.37566	1.63011	-13.6428	NA	-12.9288	-13.7451	NA	-14.1705	-10.3071	-17.7298	-14.1408
648	chrI	168585	168658	-	NA	NA	NA	NA	8.8783	2.63442	8.72657	5.5389	2.89009	8.9007	3.83801	7.05273	10.1882	-7.79989	-9.28863	-9.85514	-7.82212	-10.2432	-11.0027	-9.78764	-11.3716	-10.4092
649	chrI	168762	169063	-	YAR014C	mRNA	SGD	constitutive	116.601	64.2475	89.3284	101.586	55.8335	79.2906	68.3693	80.1413	87.8219	-17.2975	-14.3171	-16.1628	-13.7988	-8.85483	-18.3019	-18.308	-18.7342	-13.576
650	chrI	169157	169165	-	YAR014C	mRNA	SGD	inducible	NA	NA	NA	NA	NA	NA	NA	0.482555	NA	NA	NA	NA	NA	NA	NA	NA	-2.98718	NA
651	chrI	170712	170821	-	NA	NA	NA	NA	0.565606	NA	4.00629	7.83086	NA	2.01525	1.919	10.542	2.19045	-4.03345	NA	-10.1688	-12.1636	NA	-6.21584	-9.78055	-13.6303	-7.65305
652	chrI	171108	171145	-	NA	NA	NA	NA	NA	NA	NA	0.477491	NA	NA	NA	0.371196	NA	NA	NA	NA	-8.12087	NA	NA	NA	-1.9419	NA
653	chrI	171217	171228	-	NA	NA	NA	NA	NA	NA	NA	NA	NA	NA	NA	0.371196	NA	NA	NA	NA	NA	NA	NA	NA	-3.04877	NA
654	chrI	171308	171310	-	NA	NA	NA	NA	NA	NA	NA	NA	NA	NA	NA	0.259837	NA	NA	NA	NA	NA	NA	NA	NA	-0.985228	NA
655	chrI	171376	171379	-	NA	NA	NA	NA	NA	NA	NA	NA	NA	0.479822	0.413903	0.296957	0.789582	NA	NA	NA	NA	NA	-2.47075	-0.94566	-1	-2.49565
656	chrI	171602	171768	-	YAR018C	mRNA	SGD	constitutive	3.73643	11.2904	13.4865	18.0969	7.15048	17.9214	16.1046	23.5338	21.4206	-18.8056	-17.0046	-19.9454	-20.8797	-18.607	-20.3358	-20.5714	-20.0974	-18.9952
657	chrI	171933	171940	-	YAR018C	mRNA	SGD	inducible	NA	NA	NA	NA	NA	NA	NA	0.259837	NA	NA	NA	NA	NA	NA	NA	NA	-2.76589	NA
658	chrI	173721	173726	-	NA	NA	NA	NA	NA	NA	NA	NA	NA	NA	NA	0.296957	NA	NA	NA	NA	NA	NA	NA	NA	-2.21613	NA
659	chrI	174010	174081	-	NA	NA	NA	NA	NA	NA	NA	NA	NA	NA	NA	0.222718	0.203763	NA	NA	NA	NA	NA	NA	NA	-3.32193	-3.58496
660	chrI	174551	174616	-	NA	NA	NA	NA	0.514187	0.241936	1.62632	2.43521	0.847095	1.05561	0.564413	2.52413	2.03763	-0.881291	-0.991076	-8.86429	-1.92337	-4.97117	-10.3161	-0.836641	-9.13418	-5.53877
661	chrI	174687	174772	-	NA	NA	NA	NA	0.291373	NA	0.872657	2.17259	0.54812	0.983635	0.827806	4.52859	1.60463	-8.77693	NA	-10.0211	-12.7815	-8.64806	-10.244	-8.69474	-17.8203	-8.14197
662	chrI	174875	174895	-	NA	NA	NA	NA	NA	NA	NA	NA	NA	NA	NA	0.556794	NA	NA	NA	NA	NA	NA	NA	NA	-3.12012	NA
663	chrI	175024	175036	-	NA	NA	NA	NA	NA	NA	NA	0.501366	NA	NA	NA	0.445436	0.611289	NA	NA	NA	-5.44572	NA	NA	NA	-0.979869	-3.58496
664	chrI	175110	175197	-	YAR019C	mRNA	SGD	constitutive	2.91373	2.52689	6.38626	15.2797	4.08599	5.51795	6.66008	12.1752	8.25241	-17.2452	-16.3286	-19.2412	-21.9789	-16.0708	-20.0512	-20.0212	-20.8241	-19.0378
665	chrI	177051	177055	-	YAR020C	mRNA	SGD	inducible	NA	NA	NA	NA	NA	NA	NA	0.705273	NA	NA	NA	NA	NA	NA	NA	NA	-1.66295	NA
666	chrI	177303	177362	-	YAR020C	mRNA	SGD	inducible	NA	NA	NA	1.71897	NA	NA	NA	1.00223	0.407526	NA	NA	NA	-10.6777	NA	NA	NA	-12.7115	-3.50072
667	chrI	178977	178993	-	NA	NA	NA	NA	NA	NA	NA	NA	NA	0.263902	NA	NA	NA	NA	NA	NA	NA	NA	-3.97612	NA	NA	NA
668	chrI	179119	179191	-	NA	NA	NA	NA	NA	NA	NA	1.02661	NA	NA	NA	0.927991	NA	NA	NA	NA	-15.2499	NA	NA	NA	-14.3157	NA
669	chrI	179413	179469	-	NA	NA	NA	NA	NA	NA	NA	0.405868	NA	NA	NA	1.48479	NA	NA	NA	NA	-8.27845	NA	NA	NA	-11.8	NA
670	chrI	179586	179742	-	NA	NA	NA	NA	1.78252	0.2957	4.48228	5.39565	1.22081	2.44709	4.96684	12.6578	0.407526	-16.8326	-8.45429	-27.9155	-24.9989	-8.92634	-22.1702	-22.0997	-29.6065	-8.29313
671	chrI	179820	180162	-	YAR023C	mRNA	SGD	constitutive	2.86231	5.7527	5.7516	17.0464	10.3146	8.44487	6.58482	15.7758	9.27122	-23.4518	-17.3302	-27.8005	-31.0552	-19.5073	-27.4009	-25.2786	-32.8829	-16.5841
672	chrI	180497	180517	-	YAR023C	mRNA	SGD	inducible	NA	NA	0.277664	0.549115	NA	NA	NA	NA	NA	NA	NA	-4.10833	-6.70113	NA	NA	NA	NA	NA
673	chrI	180617	180672	-	YAR023C	mRNA	SGD	inducible	NA	NA	0.63466	2.57845	NA	NA	NA	2.0787	0.534878	NA	NA	-3.72887	-9.83917	NA	NA	NA	-12.8801	-10.9745
674	chrI	180784	180824	-	1R-79	XUT	Van_Dijk_2011	NA	0.308512	0.564518	0.832991	2.41133	0.473376	0.551795	NA	0.519675	0.63676	-7.98289	-1.36801	-3.71218	-10.3961	-2.75666	-1.5305	NA	-7.97303	-6.66805
675	chrI	180904	181074	-	1R-79	XUT	Van_Dijk_2011	NA	2.17673	1.23656	2.97497	8.92909	4.78359	1.41548	2.25765	3.19229	3.26021	-19.5313	-13.9057	-20.6735	-17.549	-20.2127	-17.1456	-16.3085	-13.2099	-24.3926
676	chrI	182261	182280	-	NA	NA	NA	NA	NA	NA	NA	NA	NA	NA	NA	0.259837	NA	NA	NA	NA	NA	NA	NA	NA	-4.18518	NA
677	chrI	182384	182419	-	NA	NA	NA	NA	0.856979	NA	NA	0.716237	NA	NA	NA	NA	NA	-6.68641	NA	NA	-9.65533	NA	NA	NA	NA	NA
678	chrI	183154	183163	-	1R-83	XUT	Van_Dijk_2011	NA	NA	NA	NA	NA	NA	NA	NA	0.222718	NA	NA	NA	NA	NA	NA	NA	NA	-3.16993	NA
679	chrI	183232	183391	-	1R-83	XUT	Van_Dijk_2011	NA	NA	0.241936	1.22965	3.12757	3.03957	2.92692	4.1014	6.12474	0.942405	NA	-13.5569	-17.4717	-11.6374	-13.5327	-11.8703	-17.7563	-17.4376	-17.5828
680	chrI	183543	183565	-	1R-83	XUT	Van_Dijk_2011	NA	NA	NA	1.70565	NA	0.597949	NA	0.639668	2.41278	2.62345	NA	NA	-2.51005	NA	-0.738285	NA	-1.82765	-4.16058	-2.53598
681	chrI	183813	183822	-	NA	NA	NA	NA	NA	NA	NA	NA	NA	NA	NA	0.890871	NA	NA	NA	NA	NA	NA	NA	NA	-2.76058	NA
682	chrI	184168	184180	-	NA	NA	NA	NA	NA	NA	NA	NA	NA	NA	NA	0.408316	NA	NA	NA	NA	NA	NA	NA	NA	-3.39016	NA
683	chrI	184398	184408	-	NA	NA	NA	NA	NA	NA	NA	NA	0.373718	NA	NA	NA	NA	NA	NA	NA	NA	-3.05051	NA	NA	NA	NA
684	chrI	184480	184540	-	NA	NA	NA	NA	NA	NA	NA	NA	0.622864	NA	1.27934	NA	NA	NA	NA	NA	NA	-6.12583	NA	-13.0976	NA	NA
685	chrI	184672	184680	-	NA	NA	NA	NA	NA	0.349463	NA	NA	NA	NA	NA	NA	NA	NA	-2.67147	NA	NA	NA	NA	NA	NA	NA
686	chrI	186976	186988	-	YAR030C	mRNA	SGD	inducible	NA	NA	NA	NA	NA	NA	NA	0.408316	NA	NA	NA	NA	NA	NA	NA	NA	-3.03055	NA
687	chrI	187172	187281	-	YAR030C	mRNA	SGD	inducible	NA	NA	NA	2.41133	NA	NA	NA	3.52636	NA	NA	NA	NA	-19.9033	NA	NA	NA	-21.8864	NA
688	chrI	187888	187927	-	1R-87	XUT	Van_Dijk_2011	NA	NA	NA	NA	0.763986	NA	NA	NA	NA	0.356586	NA	NA	NA	-10.234	NA	NA	NA	NA	-10.0103
689	chrI	188920	189092	-	1R-90	XUT	Van_Dijk_2011	NA	0.959816	3.62904	2.37997	14.086	10.4143	3.74261	3.0102	5.23387	5.60349	-12.6865	-16.3123	-16.948	-24.2708	-20.2812	-20.3349	-17.5408	-18.8042	-22.6
690	chrI	190012	190069	-	1R-91	XUT	Van_Dijk_2011	NA	3.61645	5.61829	17.1755	32.7559	21.9995	16.7458	7.86416	35.1523	16.5303	-15.3173	-14.3406	-15.8213	-15.6243	-17.086	-14.6922	-15.2635	-16.4625	-14.8966
691	chrI	191388	191401	-	NA	NA	NA	NA	NA	NA	NA	NA	NA	NA	NA	0.296957	NA	NA	NA	NA	NA	NA	NA	NA	-3.53183	NA
692	chrI	191857	191920	-	SUT436	SUT	Xu_2009	NA	0.719862	0.806454	NA	3.86768	1.1959	NA	0.451531	1.11359	2.01216	-13.4553	-13.2756	NA	-13.6597	-13.2105	NA	-10.9753	-12.6029	-15.6174
693	chrI	198019	198050	-	NA	NA	NA	NA	NA	NA	NA	1.16985	0.27406	NA	NA	1.85598	NA	NA	NA	NA	-7.0614	-2.30807	NA	NA	-9.89394	NA
694	chrI	198182	198353	-	NA	NA	NA	NA	1.19977	5.94088	NA	4.27355	1.99316	2.13521	1.20408	7.68376	NA	-17.7998	-21.1683	NA	-15.6686	-15.8774	-11.3186	-15.1889	-17.2219	NA
695	chrI	198696	198886	-	NA	NA	NA	NA	1.07979	0.349463	0.356996	4.24967	1.04641	2.01525	0.639668	5.6793	0.280174	-10.7012	-1.92247	-10.9879	-27.1926	-18.8257	-22.7457	-18.2893	-26.217	-11.7556
696	chrI	198967	199014	-	NA	NA	NA	NA	1.37117	1.61291	2.10231	7.61598	1.76893	4.75024	1.46747	7.5724	1.01882	-6.40764	-6.83584	-6.64439	-6.7063	-6.28484	-9.40065	-5.7873	-6.2367	-8.99109
697	chrI	199120	199139	-	NA	NA	NA	NA	NA	NA	NA	NA	NA	NA	NA	0.222718	NA	NA	NA	NA	NA	NA	NA	NA	-4.24793	NA
698	chrI	200175	200179	-	CUT442	CUT	Xu_2009	NA	NA	NA	NA	NA	NA	NA	NA	0.222718	NA	NA	NA	NA	NA	NA	NA	NA	-2	NA
699	chrI	200391	200443	-	CUT442	CUT	Xu_2009	NA	1.67968	3.38711	0.95199	3.96318	1.46996	1.53543	0.940689	8.01784	4.86485	-7.42137	-6.22171	-4.10737	-5.28112	-5.96789	-2.73039	-9.01871	-3.96627	-14.8569
700	chrI	205074	205077	-	NA	NA	NA	NA	NA	NA	NA	NA	NA	NA	NA	0.259837	NA	NA	NA	NA	NA	NA	NA	NA	-1.56155	NA
701	chrI	206907	207224	-	1R-103	XUT	Van_Dijk_2011	NA	3.73643	0.806454	5.39461	14.9455	0.722522	8.06101	2.03189	6.94137	1.50275	-16.4175	-15.917	-15.6077	-26.2604	-14.3816	-18.485	-20.7074	-22.7178	-13.6628
702	chrI	207294	207359	-	1R-103	XUT	Van_Dijk_2011	NA	1.31975	NA	0.396662	3.36631	NA	NA	NA	2.19006	NA	-12.9388	NA	-8.00309	-18.2737	NA	NA	NA	-11.481	NA
703	chrI	207559	207571	-	NA	NA	NA	NA	NA	NA	NA	0.52524	NA	NA	NA	NA	NA	NA	NA	NA	-5.519	NA	NA	NA	NA	NA
704	chrI	207633	207695	-	NA	NA	NA	NA	1.11407	0.215054	0.515661	5.49115	1.64436	0.43184	0.564413	0.816632	0.483937	-8.62965	-3.32193	-7.56127	-13.1311	-11.4991	-7.55496	-9.47445	-12.6529	-8.40446
705	chrI	208064	208102	-	NA	NA	NA	NA	0.342792	0.672045	0.832991	2.88882	0.348804	1.53543	0.526786	0.816632	0.407526	-1.9419	-8.97304	-10.9714	-10.6246	-1.88057	-8.52979	-5.68291	-8.31857	-4.75489
706	chrI	208600	208672	-	NA	NA	NA	NA	0.959816	0.618281	NA	0.978857	0.473376	NA	0.451531	2.00446	0.687701	-12.7682	-3.947	NA	-15.5397	-8.76785	NA	-6.71881	-16.1813	-12.9603
707	chrI	208926	208931	-	NA	NA	NA	NA	NA	NA	NA	NA	NA	NA	NA	0.371196	NA	NA	NA	NA	NA	NA	NA	NA	-2.25448	NA
708	chrI	209004	209008	-	NA	NA	NA	NA	NA	NA	NA	0.286495	NA	NA	NA	0.371196	NA	NA	NA	NA	-1.95974	NA	NA	NA	-1.76258	NA
709	chrI	209203	209232	-	NA	NA	NA	NA	NA	NA	NA	0.501366	NA	NA	NA	NA	0.203763	NA	NA	NA	-2.83878	NA	NA	NA	NA	-1
710	chrI	223020	223039	-	NA	NA	NA	NA	NA	0.241936	NA	0.52524	NA	NA	NA	NA	0.203763	NA	-4.13271	NA	-0.902393	NA	NA	NA	NA	-4.16993
711	chrI	227269	227276	-	NA	NA	NA	NA	0.291373	NA	NA	0.358118	NA	NA	NA	NA	NA	-2.62956	NA	NA	-4.44955	NA	NA	NA	NA	NA
712	chrII	5950	5955	+	NA	NA	NA	NA	NA	NA	0.31733	NA	NA	NA	NA	0.482555	NA	NA	NA	-2.21613	NA	NA	NA	NA	-1.80959	NA
713	chrII	8417	8577	+	NA	NA	NA	NA	0.771281	0.510754	1.22965	4.05868	1.39521	2.711	0.376275	2.82109	2.90362	-15.7567	-10.0402	-10.034	-11.125	-17.2034	-9.58983	-10.0227	-12.7209	-24.957
714	chrII	8758	8858	+	YBL107W-A	mRNA	SGD	inducible	NA	NA	NA	2.41133	NA	1.51144	0.338648	2.96957	1.14617	NA	NA	NA	-10.8636	NA	-10.1633	-4.28336	-12.6444	-13.8739
715	chrII	9332	9333	+	NA	NA	NA	NA	3.32508	1.23656	3.1733	2.74557	NA	1.46346	2.1824	2.4499	1.73199	0	0	0	0	NA	0	0	0	0
716	chrII	10622	10813	+	2F-2	XUT	Van_Dijk_2011	NA	0.925537	0.618281	2.34031	5.01366	3.31363	2.49508	1.42985	6.31034	2.29234	-13.8264	-6.86244	-18.2674	-18.1529	-14.9364	-20.5777	-9.12809	-23.5407	-20.359
717	chrII	10925	10959	+	2F-2	XUT	Van_Dijk_2011	NA	NA	NA	0.396662	1.86222	NA	NA	NA	NA	NA	NA	NA	-3.45943	-10.4224	NA	NA	NA	NA	NA
718	chrII	11017	11036	+	2F-2	XUT	Van_Dijk_2011	NA	NA	NA	NA	0.238746	NA	NA	NA	NA	NA	NA	NA	NA	-4.24793	NA	NA	NA	NA	NA
719	chrII	11503	11517	+	2F-2	XUT	Van_Dijk_2011	NA	NA	NA	NA	1.98159	NA	0.671751	NA	1.48479	NA	NA	NA	NA	-5.2637	NA	-5.16708	NA	-3.46369	NA
720	chrII	13201	13216	+	2F-2	XUT	Van_Dijk_2011	NA	2.02247	NA	NA	NA	NA	NA	NA	NA	NA	0	NA	NA	NA	NA	NA	NA	NA	NA
721	chrII	13297	13330	+	2F-2	XUT	Van_Dijk_2011	NA	0.8227	NA	NA	1.07436	NA	0.479822	NA	0.334077	0.229234	-6.71252	NA	NA	-6.65878	NA	-6.95168	NA	-6.95513	-4.13271
722	chrII	17696	17763	+	NA	NA	NA	NA	NA	NA	NA	0.381993	NA	NA	NA	1.48479	NA	NA	NA	NA	-1.51274	NA	NA	NA	-12.4057	NA
723	chrII	22820	22822	+	NA	NA	NA	NA	NA	NA	NA	NA	NA	NA	NA	0.482555	NA	NA	NA	NA	NA	NA	NA	NA	-0.77935	NA
724	chrII	23962	24027	+	YBL102W	mRNA	SGD	constitutive	14.9114	14.1667	8.9249	16.0915	8.19689	5.58993	9.5574	6.12474	15.4605	-5.35815	-11.1169	-4.56075	-6.93857	-5.9007	-5.19206	-2.73621	-7.88105	-6.6034
725	chrII	24077	24285	+	YBL102W	mRNA	SGD	constitutive	2.43382	3.14517	5.03761	7.18624	3.61261	7.34128	19.1148	10.9874	5.32331	-18.9456	-15.9207	-15.9323	-20.5746	-15.452	-14.2139	-19.8848	-14.901	-18.0504
726	chrII	24481	24536	+	NA	NA	NA	NA	NA	NA	0.237997	NA	NA	NA	0.489158	0.556794	0.254704	NA	NA	-1	NA	NA	NA	-11.4394	-13.0647	-8.60164
727	chrII	24684	24691	+	NA	NA	NA	NA	NA	NA	NA	NA	NA	NA	NA	0.259837	NA	NA	NA	NA	NA	NA	NA	NA	-2.76589	NA
728	chrII	28483	28687	+	NA	NA	NA	NA	2.22814	0.349463	1.11065	8.66647	1.91842	1.58341	1.16645	7.16409	4.27903	-22.9395	-16.832	-15.0378	-20.521	-22.4134	-19.4419	-21.3277	-24.3491	-29.6659
729	chrII	29438	29635	+	NA	NA	NA	NA	5.7589	3.46775	2.10231	6.23126	4.78359	3.14284	5.64413	8.64887	3.84603	-22.6819	-18.5062	-17.8807	-19.805	-19.7756	-20.535	-21.6433	-22.9466	-19.6312
730	chrII	29938	29966	+	YBLWTy2-1	LTR_retrotransposon	SGD	NA	0.222814	NA	NA	NA	NA	NA	NA	0.222718	NA	-2.31201	NA	NA	NA	NA	NA	NA	-1.58496	NA
731	chrII	30400	30415	+	YBLWTy2-1	LTR_retrotransposon	SGD	NA	0.239954	NA	NA	0.453617	NA	0.479822	0.451531	0.668153	NA	-3.40833	NA	NA	-2.87643	NA	-5.39281	-5.86034	-7.28177	NA
732	chrII	30474	30534	+	YBLWTy2-1	LTR_retrotransposon	SGD	NA	0.719862	NA	0.475995	0.763986	0.622864	1.43947	0.338648	1.29919	0.509408	-7.8712	NA	-11.474	-11.5947	-13.4217	-4.73595	-8.78697	-11.8683	-10.7737
733	chrII	30753	30773	+	YBLWTy2-1	LTR_retrotransposon	SGD	NA	NA	NA	NA	1.64734	NA	0.935653	0.564413	2.48702	NA	NA	NA	NA	0	NA	-4.40502	-2.95085	-2.177	NA
734	chrII	31447	31451	+	YBLWTy2-1	LTR_retrotransposon	SGD	NA	NA	NA	NA	NA	NA	NA	NA	0.259837	NA	NA	NA	NA	NA	NA	NA	NA	-1.97046	NA
735	chrII	32021	32025	+	YBLWTy2-1	LTR_retrotransposon	SGD	NA	NA	NA	NA	NA	NA	0.767715	NA	0.705273	NA	NA	NA	NA	NA	NA	-1.51576	NA	-0.831474	NA
736	chrII	32750	32804	+	YBLWTy2-1	LTR_retrotransposon	SGD	NA	0.239954	NA	NA	NA	NA	0.575787	0.489158	1.81886	0.254704	-7.96361	NA	NA	NA	NA	-1.38029	-3.05247	-13.4781	-7.60564
737	chrII	33560	33613	+	YBLWTy2-1	LTR_retrotransposon	SGD	NA	0.582746	NA	1.66598	NA	NA	1.0796	NA	1.63326	NA	-9.69104	NA	-12.1312	NA	NA	-13.1729	NA	-15.1923	NA
738	chrII	34472	34612	+	YBLWTy2-1	LTR_retrotransposon	SGD	NA	NA	NA	0.674326	NA	NA	0.263902	NA	0.890871	NA	NA	NA	-12.0017	NA	NA	-9.51193	NA	-18.6448	NA
740	chrII	36671	37041	+	YBL099W	mRNA	SGD	constitutive	244.993	252.528	457.352	646.833	414.179	190.825	476.967	320.083	356.509	-15.2899	-10.4619	-8.24869	-6.90062	-7.87911	-10.2961	-5.69968	-8.3911	-14.5472
741	chrII	37131	37151	+	NA	NA	NA	NA	NA	NA	NA	NA	NA	NA	0.225765	NA	NA	NA	NA	NA	NA	NA	NA	-4.32193	NA	NA
742	chrII	37216	37514	+	NA	NA	NA	NA	1.42258	NA	2.10231	2.38746	0.82218	0.311884	4.59056	1.7075	2.36875	-24.3984	NA	-29.8098	-25.6648	-25.487	-15.041	-29.4067	-28.3155	-26.2503
743	chrII	37608	37684	+	NA	NA	NA	NA	2.00533	0.779572	3.09397	4.34517	2.71569	NA	2.37054	1.96734	3.13286	-2.69363	-9.73913	-6.06073	-10.8785	-4.1324	NA	-6.77507	-9.05628	-9.98369
744	chrII	37953	37972	+	NA	NA	NA	NA	0.257094	NA	NA	NA	NA	NA	0.451531	NA	NA	-4.2343	NA	NA	NA	NA	NA	-4.16241	NA	NA
745	chrII	38032	38227	+	NA	NA	NA	NA	NA	NA	0.912323	NA	NA	NA	0.865434	1.00223	1.09523	NA	NA	-17.3243	NA	NA	NA	-17.8937	-20.2079	-20.6769
746	chrII	38411	38428	+	NA	NA	NA	NA	1.76538	NA	2.02298	1.5996	1.86859	0.743724	1.76849	1.29919	1.88481	-1.18602	NA	-1.48458	-1.02106	-0.937779	-1.37755	-2.56149	-1.0476	-1.26859
747	chrII	38481	38557	+	NA	NA	NA	NA	1.49114	1.12904	3.25263	0.716237	2.26722	0.86368	2.44579	1.18783	2.90362	-6.91675	-11.7011	-16.8066	-6.72079	-7.88747	-10.4403	-15.8133	-8.51138	-15.0966
748	chrII	38597	38662	+	NA	NA	NA	NA	2.57094	2.60753	7.06059	1.16985	4.18564	1.77534	2.5963	2.63549	4.94126	-2.13869	-2.40938	-2.16707	-2.08612	-1.73235	-1.3343	-3.95868	-2.72095	-2.0818
749	chrII	39093	39183	+	YBL098W	mRNA	SGD	constitutive	19.8305	26.0753	10.1546	9.62145	21.0777	11.5157	15.051	8.57463	21.3951	-6.52595	-5.62153	-8.41526	-12.5926	-7.89579	-6.61657	-9.75579	-10.4607	-8.57267
750	chrII	39592	39620	+	NA	NA	NA	NA	NA	NA	NA	1.62347	NA	NA	NA	1.26207	NA	NA	NA	NA	-5.64364	NA	NA	NA	-10.2068	NA
751	chrII	40013	40088	+	NA	NA	NA	NA	1.07979	1.82796	0.753658	2.65008	0.847095	0.815698	2.89732	1.63326	2.31781	-9.87669	-16.6241	-15.0364	-13.8543	-13.0935	-7.37006	-11.3581	-8.08608	-16.3277
752	chrII	40178	40233	+	NA	NA	NA	NA	0.599885	1.37097	1.18999	0.907233	NA	1.36749	0.790178	3.22941	0.764112	-9.42477	-10.5535	-4.48515	-9.52399	NA	-5.44415	-5.33295	-13.323	-12.6167
753	chrII	40659	41138	+	YBL097W	mRNA	SGD	constitutive	8.80974	10.5645	15.4302	7.92635	7.49928	17.4175	7.45025	12.8805	7.84488	-25.8341	-14.7476	-28.0283	-15.7977	-20.458	-25.3245	-21.1676	-23.1114	-28.7398
754	chrII	41163	41228	+	NA	NA	NA	NA	2.15959	0.860217	4.99795	1.5996	1.61945	5.35002	1.24171	3.52636	2.98004	-7.9306	-7.38317	-8.99849	-7.47224	-8.39566	-9.52618	-7.52957	-8.87663	-8.40357
755	chrII	41295	41315	+	NA	NA	NA	NA	0.325652	NA	1.11065	NA	0.448462	1.05561	NA	0.779512	0.432997	-1.58179	NA	-5.42416	NA	-1.58496	-1.38789	NA	-3.01994	-1.581
756	chrII	41770	41775	+	NA	NA	NA	NA	NA	NA	NA	NA	NA	NA	NA	0.222718	NA	NA	NA	NA	NA	NA	NA	NA	-2.32193	NA
757	chrII	41857	41918	+	NA	NA	NA	NA	NA	NA	1.82465	NA	NA	1.27153	NA	1.07647	0.63676	NA	NA	-13.1129	NA	NA	-8.83673	NA	-8.5403	-9.18353
758	chrII	41997	42045	+	NA	NA	NA	NA	0.342792	0.430109	2.85597	NA	0.622864	2.20718	0.752551	1.00223	0.458467	-0.992774	-3	-4.18328	NA	-2.99738	-5.73651	-4.47231	-10.5686	-7.26229
759	chrII	42112	42132	+	NA	NA	NA	NA	NA	NA	0.515661	NA	NA	0.311884	NA	NA	NA	NA	NA	-6.59628	NA	NA	-3.8902	NA	NA	NA
760	chrII	42514	42701	+	NA	NA	NA	NA	NA	NA	2.73697	0.310369	NA	1.91929	NA	0.222718	NA	NA	NA	-17.892	-3.79109	NA	-13.1283	NA	-10.6737	NA
761	chrII	43232	43374	+	YBL095W	mRNA	SGD	constitutive	18.1337	11.5323	12.5345	34.5942	41.1339	16.146	20.0931	33.4077	21.6753	-8.99416	-7.2894	-8.17693	-11.2705	-8.50524	-6.96494	-5.23027	-8.17644	-9.56291
762	chrII	43468	43476	+	NA	NA	NA	NA	NA	NA	NA	0.52524	0.348804	NA	NA	NA	0.254704	NA	NA	NA	-4.74607	-1	NA	NA	NA	-2.7258
763	chrII	43555	43597	+	NA	NA	NA	NA	0.617025	NA	0.356996	1.24148	0.697607	0.527804	0.639668	1.85598	0.713171	-2.99332	NA	-7.61948	-7.70625	-2.58936	-2.92806	-2.99251	-6.89051	-2.82086
764	chrII	43715	43733	+	NA	NA	NA	NA	NA	NA	NA	0.83561	0.573035	0.287893	0.225765	0.334077	0.305645	NA	NA	NA	-7.98966	-6.25791	-1	-1	-4.13271	-4.08746
765	chrII	43800	43817	+	NA	NA	NA	NA	NA	NA	NA	NA	0.27406	NA	NA	NA	NA	NA	NA	NA	NA	-4.06306	NA	NA	NA	NA
766	chrII	43891	43912	+	NA	NA	NA	NA	NA	NA	NA	NA	NA	NA	NA	NA	0.229234	NA	NA	NA	NA	NA	NA	NA	NA	-4.35312
767	chrII	45120	45134	+	YBL092W	mRNA.w.5UTRintron	SGD	inducible	NA	NA	NA	NA	NA	NA	NA	0.371196	NA	NA	NA	NA	NA	NA	NA	NA	-3.69675	NA
768	chrII	45294	45364	+	YBL092W	mRNA.w.5UTRintron	SGD	inducible	0.428489	0.806454	NA	0.453617	0.298975	1.15157	0.263393	1.15071	2.03763	-5.11597	-13.7415	NA	-3.1126	-8.1208	-9.71635	-1.97046	-6.4332	-16.2167
770	chrII	45491	45738	+	YBL092W	mRNA.w.5UTRintron	SGD	constitutive	2019.49	2484.07	970.752	285.707	527.341	1038.07	1273.17	499.593	979.973	-13.5676	-12.3746	-12.5815	-12.5331	-11.5573	-13.3332	-11.9657	-13.1889	-17.6198
771	chrII	45924	46145	+	NA	NA	NA	NA	42.369	28.8173	21.1818	16.3541	7.15048	20.8243	29.8386	33.2221	19.5613	-25.425	-30.1799	-28.0745	-17.7091	-20.9214	-30.3167	-26.7015	-19.0031	-31.2888
772	chrII	46566	46590	+	NA	NA	NA	NA	0.874118	0.806454	1.30899	0.978857	2.44163	1.10359	1.35459	1.44767	1.34993	-4.24026	-5.94152	-2.05482	-5.37232	-6.29272	-5.44534	-8.13221	-2.27518	-7.00214
773	chrII	46741	46927	+	SUT005	SUT	Xu_2009	NA	2.77661	3.38711	3.53029	7.75923	4.36005	2.711	3.16071	9.79958	5.55255	-6.83718	-4.43676	-9.18367	-16.6146	-7.7207	-14.172	-3.79616	-18.3341	-15.0819
774	chrII	48729	48971	+	YBL090W	mRNA	SGD	constitutive	105.768	129.14	172.032	121.044	167.824	96.1803	173.99	164.106	146.557	-13.139	-11.8158	-13.0001	-15.9845	-10.7922	-12.4865	-12.2706	-14.2442	-16.7351
775	chrII	49049	49102	+	YBL089W	mRNA	SGD	constitutive	2.21101	1.82796	1.62632	2.50683	1.17098	1.31951	2.74681	1.18783	2.67439	-6.66209	-8.70418	-6.5408	-7.38921	-8.3144	-7.52288	-8.84077	-6.48703	-7.40678
776	chrII	49506	49630	+	YBL089W	mRNA	SGD	constitutive	14.6372	16.3172	17.1358	23.4448	21.003	18.3292	18.889	26.058	13.7285	-15.9269	-15.3132	-16.6161	-14.8805	-17.0889	-13.7601	-15.6805	-16.7995	-16.7367
777	chrII	49686	49701	+	NA	NA	NA	NA	NA	NA	NA	NA	NA	NA	NA	0.259837	NA	NA	NA	NA	NA	NA	NA	NA	-3.84918	NA
778	chrII	49886	49908	+	NA	NA	NA	NA	NA	NA	0.31733	0.358118	NA	0.479822	NA	1.00223	NA	NA	NA	-1.51274	-2.91285	NA	-3.50629	NA	-11.2314	NA
779	chrII	50236	50243	+	NA	NA	NA	NA	NA	NA	NA	NA	NA	NA	NA	0.222718	NA	NA	NA	NA	NA	NA	NA	NA	-2.80735	NA
780	chrII	50342	50350	+	NA	NA	NA	NA	NA	NA	NA	NA	0.27406	NA	NA	NA	NA	NA	NA	NA	NA	-2.98209	NA	NA	NA	NA
781	chrII	50425	50429	+	NA	NA	NA	NA	0.856979	0.564518	0.594994	NA	0.747436	0.575787	0.413903	0.408316	0.66223	-1.53892	-1.58237	-1.45546	NA	-1.56458	-1.38029	-1.5755	-1.5755	-2.93107
782	chrII	59780	59802	+	NA	NA	NA	NA	NA	NA	NA	NA	NA	NA	NA	0.408316	NA	NA	NA	NA	NA	NA	NA	NA	-7.01301	NA
783	chrII	60178	60186	+	NA	NA	NA	NA	NA	NA	NA	0.358118	NA	NA	NA	NA	NA	NA	NA	NA	-2.91285	NA	NA	NA	NA	NA
784	chrII	63474	63535	+	YBL085W	mRNA	SGD	inducible	0.359931	0.672045	0.63466	0.978857	1.12115	NA	0.376275	1.11359	0.407526	-5.449	-11.1581	-5.20728	-12.9022	-11.9181	NA	-11.1016	-14.8769	-1.58496
785	chrII	63606	64083	+	YBL085W	mRNA	SGD	constitutive	84.241	92.7959	121.339	178.988	104.566	123.554	85.6027	130.03	111.968	-20.0575	-15.9694	-23.2398	-22.1765	-17.3934	-23.2334	-21.0338	-27.0865	-27.8125
786	chrII	64571	64646	+	NA	NA	NA	NA	NA	NA	NA	NA	NA	0.575787	0.225765	NA	0.280174	NA	NA	NA	NA	NA	-14.1398	-2.58496	NA	-9.53087
787	chrII	64779	64783	+	NA	NA	NA	NA	NA	NA	NA	NA	NA	NA	NA	NA	0.331115	NA	NA	NA	NA	NA	NA	NA	NA	-1.92247
788	chrII	64848	64893	+	NA	NA	NA	NA	NA	NA	NA	NA	NA	NA	NA	0.371196	0.203763	NA	NA	NA	NA	NA	NA	NA	-6.2838	-1
789	chrII	64950	64955	+	NA	NA	NA	NA	NA	0.2957	0.713992	NA	NA	NA	NA	0.631034	NA	NA	-0.99403	-0.964079	NA	NA	NA	NA	-1.57425	NA
790	chrII	65057	65151	+	NA	NA	NA	NA	2.2967	1.90861	8.88524	1.43247	3.28872	5.398	2.44579	6.0505	4.53373	-6.74525	-4.15066	-7.8653	-4.42535	-5.51584	-5.1288	-4.4511	-5.57717	-5.18195
791	chrII	65209	65297	+	NA	NA	NA	NA	NA	NA	1.26932	NA	NA	NA	0.489158	1.55902	0.687701	NA	NA	-16.2977	NA	NA	NA	-8.06442	-14.3054	-11.2252
792	chrII	65551	65688	+	NA	NA	NA	NA	2.57094	2.957	8.25058	1.09823	5.25697	4.48634	2.37054	8.27768	3.92244	-1.47569	-1.25901	-7.73625	-1.44371	-7.9806	-1.44287	-7.01449	-10.8386	-7.37808
793	chrII	65750	65934	+	NA	NA	NA	NA	0.359931	0.430109	1.86431	0.334244	0.622864	1.65539	0.413903	3.93468	0.382056	-9.72029	-10.0153	-19.6723	-1.97046	-8.77219	-19.8882	-15.4431	-25.8745	-13.4489
794	chrII	66466	66470	+	NA	NA	NA	NA	0.479908	0.698927	NA	0.310369	NA	0.719733	0.639668	0.96511	0.66223	-0.905928	-0.890492	NA	-0.961237	NA	-0.721928	-0.787127	-0.77935	-2.39637
795	chrII	66571	66583	+	NA	NA	NA	NA	NA	NA	NA	NA	NA	NA	NA	0.259837	NA	NA	NA	NA	NA	NA	NA	NA	-3.53201	NA
796	chrII	71536	71607	+	YBL081W	mRNA	SGD	constitutive	8.53551	13.4947	27.7664	6.63713	7.84808	11.8036	33.5261	22.7172	28.6797	-9.38606	-11.242	-11.4727	-9.36529	-11.3762	-9.80004	-10.1139	-11.0095	-10.7409
797	chrII	71800	72006	+	YBL081W	mRNA	SGD	inducible	0.531327	0.483872	3.0543	NA	0.448462	1.03162	1.99426	7.5724	2.9291	-2.7032	-2.29261	-17.727	NA	-4.71463	-19.667	-16.0941	-27.8097	-19.8629
798	chrII	72153	72344	+	NA	NA	NA	NA	1.76538	0.591399	8.64724	NA	1.46996	4.24643	6.02041	7.49817	4.91579	-18.2555	-7.93434	-21.2777	NA	-20.1176	-23.5326	-19.6886	-23.506	-22.9686
799	chrII	72426	72443	+	NA	NA	NA	NA	NA	NA	1.03132	NA	NA	NA	NA	0.779512	0.432997	NA	NA	-7.60634	NA	NA	NA	NA	-1.51952	-1.54917
800	chrII	72534	72546	+	NA	NA	NA	NA	NA	NA	0.555327	NA	NA	NA	NA	NA	0.280174	NA	NA	-3.37089	NA	NA	NA	NA	NA	-3.39016
801	chrII	74148	74153	+	NA	NA	NA	NA	NA	NA	NA	NA	NA	NA	NA	NA	0.203763	NA	NA	NA	NA	NA	NA	NA	NA	-2.32193
802	chrII	74417	74422	+	YBL079W	mRNA	SGD	inducible	NA	0.268818	NA	NA	0.448462	NA	NA	0.519675	NA	NA	-2.32193	NA	NA	-2.13222	NA	NA	-3.46574	NA
803	chrII	75152	75479	+	YBL079W	mRNA	SGD	constitutive	63.485	58.3872	75.6038	116.651	82.5668	99.707	57.2691	113.178	72.8199	-12.7296	-16.6815	-12.3279	-18.2369	-18.7129	-17.5101	-14.68	-21.8932	-17.3372
804	chrII	75540	75547	+	NA	NA	NA	NA	0.531327	NA	NA	NA	NA	NA	NA	0.482555	NA	-2.43998	NA	NA	NA	NA	NA	NA	-4.09106	NA
805	chrII	75633	75691	+	NA	NA	NA	NA	1.49114	0.45699	1.58665	3.19919	1.42013	2.75898	1.16645	2.04158	1.96122	-4.39415	-0.936667	-10.3369	-9.96744	-2.76479	-10.0388	-2.60839	-7.79846	-6.13363
806	chrII	75753	75868	+	NA	NA	NA	NA	NA	NA	0.396662	4.89428	NA	0.335876	NA	5.08539	NA	NA	NA	-8.17688	-18.3294	NA	-9.16643	NA	-22.0219	NA
807	chrII	76141	76144	+	NA	NA	NA	NA	NA	NA	NA	NA	NA	NA	0.376275	NA	NA	NA	NA	NA	NA	NA	NA	-1.39681	NA	NA
808	chrII	76256	76274	+	NA	NA	NA	NA	NA	NA	NA	NA	NA	NA	NA	0.408316	NA	NA	NA	NA	NA	NA	NA	NA	-3.94333	NA
809	chrII	76457	76501	+	NA	NA	NA	NA	0.976956	0.403227	0.475995	0.668488	1.04641	NA	0.865434	1.18783	0.738641	-11.9476	-7.2704	-6.35431	-8.98281	-10.3433	NA	-7.36978	-10.5043	-10.5705
810	chrII	76570	76642	+	NA	NA	NA	NA	1.97105	0.215054	5.03761	1.64734	2.81534	3.95853	1.65561	5.01115	3.8715	-13.6065	-10.323	-17.9065	-16.511	-13.0714	-14.6208	-12.4352	-13.6626	-13.9408
811	chrII	76716	76734	+	NA	NA	NA	NA	0.599885	NA	1.26932	NA	0.921838	1.10359	0.263393	1.26207	0.713171	-3.6991	NA	-6.3838	NA	-5.72509	-5.29639	-2.54678	-7.67696	-3.77047
812	chrII	77284	77292	+	NA	NA	NA	NA	0.39421	0.215054	0.475995	NA	0.722522	0.335876	NA	0.445436	0.203763	-2.1643	-2.32193	-4.66376	NA	-6.88373	-2.32193	NA	-2.27518	-2.32193
813	chrII	77358	77385	+	NA	NA	NA	NA	NA	NA	0.594994	NA	NA	NA	NA	0.556794	NA	NA	NA	-5.03889	NA	NA	NA	NA	-9.34619	NA
814	chrII	77614	77653	+	NA	NA	NA	NA	NA	0.241936	0.356996	NA	1.3703	1.03162	0.451531	1.29919	0.840523	NA	-7.67104	-6.66189	NA	-4.5879	-7.04674	-7.86961	-9.48632	-9.65235
815	chrII	78819	78831	+	NA	NA	NA	NA	NA	NA	NA	NA	NA	NA	0.263393	0.408316	NA	NA	NA	NA	NA	NA	NA	-1.97046	-2.99767	NA
816	chrII	79277	79283	+	NA	NA	NA	NA	NA	0.268818	NA	NA	0.448462	0.407849	NA	0.259837	0.585819	NA	-0.970951	NA	NA	-2.45135	-0.997503	NA	-0.985228	-5.04883
817	chrII	79517	79520	+	NA	NA	NA	NA	NA	NA	0.356996	NA	NA	NA	NA	NA	NA	NA	NA	-1.45546	NA	NA	NA	NA	NA	NA
818	chrII	79897	79899	+	YBL077W	mRNA	SGD	inducible	NA	NA	NA	NA	0.298975	NA	NA	NA	NA	NA	NA	NA	NA	-1	NA	NA	NA	NA
819	chrII	84537	84559	+	NA	NA	NA	NA	NA	NA	NA	NA	NA	NA	NA	0.222718	0.534878	NA	NA	NA	NA	NA	NA	NA	-2.58496	-6.28769
820	chrII	86905	86920	+	YBL073W	mRNA	SGD	inducible	NA	NA	NA	0.572989	NA	NA	NA	0.482555	NA	NA	NA	NA	-2.27755	NA	NA	NA	-5.96283	NA
821	chrII	87557	87571	+	YBL073W	mRNA	SGD	inducible	NA	NA	NA	0.477491	NA	NA	NA	NA	NA	NA	NA	NA	-3.08882	NA	NA	NA	NA	NA
822	chrII	88004	88056	+	NA	NA	NA	NA	NA	1.29033	NA	NA	1.09624	NA	0.564413	0.890871	1.04429	NA	-6.8174	NA	NA	-5.05054	NA	-1.44386	-4.88998	-9.19749
823	chrII	89889	90027	+	YBL071W-A	mRNA	SGD	constitutive	52.0529	22.3388	37.6829	92.681	49.1564	52.8764	36.7621	86.8228	74.4245	-4.77867	-4.95358	-2.42945	-2.21522	-4.67246	-2.53389	-5.95279	-3.91632	-5.04461
824	chrII	90060	90189	+	NA	NA	NA	NA	5.5875	0.591399	3.80796	9.07233	3.13923	5.51795	3.57462	8.24056	12.3022	-8.03809	-7.02118	-6.13044	-8.1609	-9.63717	-2.25179	-5.4149	-15.1518	-6.69887
825	chrII	90326	90352	+	YBL069W	mRNA	SGD	inducible	NA	NA	NA	NA	NA	NA	NA	NA	0.891464	NA	NA	NA	NA	NA	NA	NA	NA	-8.96532
826	chrII	90614	90747	+	YBL069W	mRNA	SGD	constitutive	17.7566	39.3549	56.0881	26.4769	48.5086	84.3287	49.405	82.2942	131.504	-12.3454	-13.2123	-11.6891	-8.11743	-9.10206	-7.85834	-12.2011	-6.67974	-13.7482
827	chrII	90852	90874	+	NA	NA	NA	NA	NA	NA	NA	NA	NA	0.287893	NA	NA	0.585819	NA	NA	NA	NA	NA	-3.25505	NA	NA	-6.85853
828	chrII	90981	91288	+	NA	NA	NA	NA	NA	0.860217	1.30899	1.43247	NA	4.34239	1.31696	1.59614	9.75516	NA	-16.216	-22.7453	-18.55	NA	-25.8627	-14.0956	-22.2814	-30.1634
829	chrII	91359	91377	+	YBL068W-A	mRNA	SGD	inducible	NA	NA	NA	NA	NA	NA	NA	NA	0.585819	NA	NA	NA	NA	NA	NA	NA	NA	-5.64378
830	chrII	91523	91705	+	YBL068W-A	mRNA	SGD	inducible	NA	NA	0.594994	1.28923	NA	1.94328	1.20408	2.93245	4.71202	NA	NA	-15.7982	-15.0727	NA	-20.4921	-14.6209	-24.1561	-19.6806
831	chrII	92335	92440	+	YBL068W	mRNA	SGD	constitutive	78.6535	57.312	67.3136	25.88	30.1715	40.3051	60.3922	43.9496	59.4988	-19.4265	-21.5642	-20.0803	-19.2212	-18.2425	-20.2457	-20.9958	-20.4416	-21.164
832	chrII	92463	92470	+	NA	NA	NA	NA	1.23405	0.322581	1.46765	0.668488	0.423547	1.03162	1.05357	1.03935	0.891464	-1.58076	-2.51211	-1.56402	-1.56155	-2.50402	-1.5345	-4.25727	-3.88275	-2.12985
833	chrII	92577	92601	+	NA	NA	NA	NA	0.78842	NA	0.277664	NA	NA	NA	NA	0.296957	0.687701	-10.4193	NA	-7.20275	NA	NA	NA	NA	-2.58496	-8.88852
834	chrII	96336	96346	+	NA	NA	NA	NA	NA	NA	NA	NA	NA	NA	NA	NA	0.331115	NA	NA	NA	NA	NA	NA	NA	NA	-2.95815
835	chrII	96398	96421	+	CUT006	CUT	Xu_2009	NA	NA	0.483872	NA	0.811735	1.34539	NA	0.451531	0.482555	0.63676	NA	-6.46361	NA	-6.00376	-8.14732	NA	-6.85009	-4.1544	-8.11485
836	chrII	99171	99278	+	YBL065W	mRNA	SGD	inducible	NA	NA	NA	1.14598	NA	NA	NA	0.927991	NA	NA	NA	NA	-15.6809	NA	NA	NA	-18.6341	NA
837	chrII	99397	99463	+	YBL065W	mRNA	SGD	inducible	NA	NA	NA	4.0348	NA	0.287893	NA	2.04158	0.458467	NA	NA	NA	-7.27547	NA	-3.62595	NA	-11.5615	-3.70044
838	chrII	101490	101516	+	YBL063W	mRNA	SGD	inducible	NA	0.268818	NA	NA	0.573035	NA	NA	NA	NA	NA	-4.19638	NA	NA	-6.92864	NA	NA	NA	NA
839	chrII	101822	101987	+	YBL063W	mRNA	SGD	constitutive	13.5917	22.9033	44.3865	41.1836	36.3752	35.4589	25.8501	37.1567	18.5424	-5.70011	-6.29712	-5.43472	-5.6161	-7.16973	-6.51592	-6.33185	-7.22864	-6.25011
840	chrII	102055	102132	+	NA	NA	NA	NA	NA	NA	0.277664	0.405868	NA	0.599778	0.413903	1.26207	NA	NA	NA	-9.49544	-7.72012	NA	-12.109	-13.9144	-18.2582	NA
841	chrII	102307	102345	+	NA	NA	NA	NA	NA	NA	NA	1.93384	NA	NA	NA	1.63326	NA	NA	NA	NA	-9.68627	NA	NA	NA	-12.7501	NA
842	chrII	102654	102656	+	NA	NA	NA	NA	NA	NA	0.436329	NA	NA	NA	NA	NA	NA	NA	NA	-0.845351	NA	NA	NA	NA	NA	NA
843	chrII	102925	102931	+	NA	NA	NA	NA	NA	NA	0.991656	NA	0.448462	0.551795	NA	NA	0.483937	NA	NA	-3.29135	NA	-1.83659	-1.51075	NA	NA	-3.79332
844	chrII	103012	103015	+	NA	NA	NA	NA	NA	NA	NA	NA	NA	NA	NA	0.334077	NA	NA	NA	NA	NA	NA	NA	NA	-1.57082	NA
845	chrII	103151	103153	+	NA	NA	NA	NA	NA	NA	0.753658	NA	NA	0.407849	NA	NA	NA	NA	NA	-0.949452	NA	NA	-0.936667	NA	NA	NA
846	chrII	103227	103268	+	NA	NA	NA	NA	NA	NA	NA	NA	0.423547	0.43184	NA	0.445436	NA	NA	NA	NA	NA	-8.05315	-7.7909	NA	-0.918296	NA
847	chrII	103388	103390	+	NA	NA	NA	NA	NA	NA	NA	NA	NA	NA	NA	0.222718	NA	NA	NA	NA	NA	NA	NA	NA	-1	NA
848	chrII	103674	103695	+	NA	NA	NA	NA	NA	NA	0.713992	NA	NA	NA	NA	0.631034	NA	NA	NA	-3.35663	NA	NA	NA	NA	-6.44832	NA
849	chrII	107644	107748	+	YBL060W	mRNA	SGD	constitutive	5.63892	0.887099	0.475995	2.74557	1.64436	1.27153	3.08546	3.74908	0.967875	-17.5671	-15.7901	-10.7017	-13.4274	-13.1591	-9.79652	-18.5268	-15.3682	-15.6467
850	chrII	107869	107968	+	YBL060W	mRNA	SGD	constitutive	5.39897	3.46775	8.96457	15.5423	8.76992	8.42088	5.83227	15.3675	10.4683	-18.5818	-15.832	-18.5843	-22.6175	-18.1658	-15.2295	-17.2924	-20.7941	-18.1076
851	chrII	107990	107995	+	NA	NA	NA	NA	NA	NA	0.237997	NA	NA	NA	NA	NA	NA	NA	NA	-2.32193	NA	NA	NA	NA	NA	NA
852	chrII	108169	108172	+	NA	NA	NA	NA	NA	NA	NA	NA	NA	NA	NA	0.334077	NA	NA	NA	NA	NA	NA	NA	NA	-1.57082	NA
853	chrII	108443	108470	+	NA	NA	NA	NA	NA	NA	0.31733	NA	NA	NA	0.263393	NA	NA	NA	NA	-3.81774	NA	NA	NA	-3.1231	NA	NA
854	chrII	108621	108650	+	NA	NA	NA	NA	0.445629	NA	NA	NA	NA	0.503813	NA	0.482555	0.534878	-5.38956	NA	NA	NA	NA	-5.99702	NA	-5.65213	-11.2495
855	chrII	109208	109241	+	NA	NA	NA	NA	NA	NA	0.237997	NA	NA	NA	NA	1.00223	NA	NA	NA	-1.58496	NA	NA	NA	NA	-12.4985	NA
856	chrII	110650	110747	+	YBL059W	mRNA	SGD	constitutive	22.4871	27.2313	23.7601	28.7211	23.32	14.8025	18.0989	23.6452	16.6322	-18.3858	-16.5261	-16.3837	-16.7742	-16.2074	-15.5909	-17.1323	-17.2086	-18.2441
857	chrII	110788	110791	+	NA	NA	NA	NA	NA	NA	NA	0.334244	NA	NA	NA	NA	NA	NA	NA	NA	-1.56155	NA	NA	NA	NA	NA
858	chrII	110851	110867	+	NA	NA	NA	NA	1.37117	0.510754	0.594994	0.644613	0.896924	0.935653	0.677296	2.11582	0.560349	-3.70616	-1.58179	-1.45546	-3.15803	-1.49557	-1.60108	-1.58496	-4.67896	-5.28004
859	chrII	111382	111489	+	YBL058W	mRNA	SGD	constitutive	123.354	127.097	214.912	273.029	197.199	228.875	160.444	268.746	239.855	-14.0819	-8.1674	-12.8952	-13.7011	-11.5492	-11.2192	-11.5545	-13.9715	-9.97674
860	chrII	111566	111606	+	NA	NA	NA	NA	NA	NA	0.515661	0.787861	NA	0.287893	NA	1.59614	0.534878	NA	NA	-7.0051	-8.75879	NA	-1.95974	NA	-12.544	-11.5783
861	chrII	111680	112064	+	NA	NA	NA	NA	27.5776	10.5645	43.6329	46.2928	25.936	52.3486	32.3973	37.1196	59.779	-39.4154	-35.2245	-40.5804	-38.7298	-35.4239	-39.5481	-37.6389	-40.2097	-42.3388
862	chrII	112157	112247	+	NA	NA	NA	NA	1.35403	0.564518	2.10231	1.71897	0.448462	3.21481	1.69324	1.85598	4.50826	-15.9498	-12.863	-15.411	-17.3767	-9.22354	-18.5207	-20.1225	-15.5566	-21.3908
863	chrII	112347	112443	+	NA	NA	NA	NA	6.65016	3.87098	10.3132	7.30562	6.25355	8.75675	5.1926	9.02007	13.0663	-10.4972	-12.5455	-11.169	-13.1943	-11.7513	-11.2166	-9.94073	-15.1875	-10.2122
864	chrII	112454	112479	+	NA	NA	NA	NA	NA	NA	0.793325	0.477491	NA	0.719733	NA	0.259837	0.280174	NA	NA	-1.14423	-1.53892	NA	-1.14423	NA	-1.56155	-6.51723
865	chrII	112539	112546	+	NA	NA	NA	NA	NA	NA	NA	NA	NA	NA	0.263393	NA	NA	NA	NA	NA	NA	NA	NA	-2.76589	NA	NA
866	chrII	112818	112830	+	YBL056W	mRNA	SGD	inducible	NA	NA	NA	NA	NA	NA	NA	0.371196	NA	NA	NA	NA	NA	NA	NA	NA	-3.15939	NA
867	chrII	113296	113306	+	YBL056W	mRNA	SGD	inducible	NA	NA	NA	NA	NA	NA	NA	0.222718	NA	NA	NA	NA	NA	NA	NA	NA	-3.32193	NA
869	chrII	113606	114090	+	YBL056W	mRNA	SGD	constitutive	123.199	148.119	219.235	175.908	229.687	214.672	336.165	196.697	178.598	-24.6878	-22.3194	-18.3999	-23.3956	-23.0389	-17.8292	-16.1164	-19.555	-20.8489
870	chrII	114207	114210	+	NA	NA	NA	NA	NA	NA	0.277664	0.52524	NA	0.479822	NA	NA	0.382056	NA	NA	-1.56155	-1.58496	NA	-1.48046	NA	NA	-1.57988
871	chrII	114278	114342	+	NA	NA	NA	NA	NA	NA	0.555327	NA	0.348804	0.959644	0.489158	0.668153	0.432997	NA	NA	-11.6294	NA	-9.029	-10.5994	-11.409	-10.9183	-8.12198
872	chrII	114437	115110	+	NA	NA	NA	NA	9.32393	4.73119	11.5825	4.70329	10.3894	13.1231	16.067	5.75354	13.805	-34.7219	-36.7461	-35.1962	-29.029	-36.1891	-34.1025	-44.0863	-35.5312	-39.2809
873	chrII	117098	117269	+	YBL054W	mRNA	SGD	inducible	0.959816	2.63442	NA	NA	0.498291	0.335876	0.526786	0.519675	0.789582	-15.8606	-20.6393	NA	NA	-13.5614	-11.2	-9.37131	-13.4469	-9.15216
874	chrII	117341	117527	+	YBL054W	mRNA	SGD	constitutive	3.63359	1.88173	6.14827	6.27901	1.76893	2.73499	8.4662	6.0505	3.89697	-23.1045	-15.9965	-18.7191	-20.3184	-18.5502	-18.8044	-13.4991	-21.8393	-21.3142
875	chrII	117831	118166	+	NA	NA	NA	NA	0.274233	NA	2.06264	15.8288	2.3918	1.77534	1.65561	8.68599	6.95342	-9.36023	NA	-20.4956	-29.6128	-20.4506	-23.4072	-19.9715	-28.5283	-33.7848
876	chrII	118287	118307	+	NA	NA	NA	NA	NA	NA	NA	NA	NA	NA	NA	0.222718	NA	NA	NA	NA	NA	NA	NA	NA	-4.32193	NA
877	chrII	118529	118621	+	NA	NA	NA	NA	NA	NA	0.912323	1.55185	0.448462	NA	0.752551	2.63549	0.764112	NA	NA	-12.2045	-14.916	-14.3845	NA	-13.0957	-17.8342	-12.7995
878	chrII	118788	118819	+	NA	NA	NA	NA	NA	NA	0.793325	1.36085	1.76893	0.671751	NA	4.26876	NA	NA	NA	-2.64387	-2.9189	-2.67903	-2.03083	NA	-7.50833	NA
879	chrII	118875	118877	+	YBL053W	mRNA	SGD	inducible	NA	NA	NA	NA	NA	NA	NA	0.890871	NA	NA	NA	NA	NA	NA	NA	NA	-0.650022	NA
880	chrII	118953	118981	+	YBL053W	mRNA	SGD	inducible	NA	NA	NA	NA	NA	NA	NA	0.593914	NA	NA	NA	NA	NA	NA	NA	NA	-9.50518	NA
881	chrII	121337	121349	+	NA	NA	NA	NA	NA	NA	NA	0.405868	NA	NA	NA	NA	0.229234	NA	NA	NA	-1.87333	NA	NA	NA	NA	-3.14164
882	chrII	121408	121428	+	NA	NA	NA	NA	NA	NA	NA	1.55185	0.323889	NA	NA	0.631034	0.432997	NA	NA	NA	-5.80515	-3.04705	NA	NA	-8.35344	-2.49513
883	chrII	121716	121806	+	NA	NA	NA	NA	0.565606	0.483872	1.82465	9.45433	1.42013	2.18319	1.99426	12.2495	2.41969	-6.40451	-11.207	-8.82952	-15.5827	-14.0609	-10.7818	-14.8549	-12.3298	-16.5314
884	chrII	121890	121964	+	NA	NA	NA	NA	0.617025	NA	1.62632	3.55731	0.54812	1.05561	NA	8.57463	0.865993	-12.1736	NA	-13.4146	-14.627	-10.479	-9.59748	NA	-16.61	-13.2856
885	chrII	122305	122311	+	2F-32	XUT	Van_Dijk_2011	NA	NA	NA	NA	0.26262	NA	NA	NA	NA	NA	NA	NA	NA	-2.56953	NA	NA	NA	NA	NA
887	chrII	125012	125859	+	YBL050W	mRNA	SGD	constitutive	191.706	144.248	171.913	220.768	195.106	156.758	184.45	158.018	220.242	-25.6773	-15.9102	-27.1952	-33.0417	-18.4193	-27.5688	-28.5854	-36.3549	-27.4397
888	chrII	126512	126527	+	YBL049W	mRNA	SGD	inducible	NA	NA	NA	NA	NA	NA	NA	NA	0.509408	NA	NA	NA	NA	NA	NA	NA	NA	-3.16957
889	chrII	126585	126833	+	YBL049W	mRNA	SGD	constitutive	3.15368	9.24734	12.0585	113.882	34.9302	13.531	21.5982	44.9148	16.6067	-14.365	-17.833	-16.9959	-19.2383	-22.4456	-12.1032	-21.4064	-18.3006	-20.1453
890	chrII	127019	127030	+	YBL048W	mRNA	SGD	inducible	NA	NA	NA	1.14598	NA	NA	0.338648	0.334077	NA	NA	NA	NA	-4.59909	NA	NA	-0.918296	-1.98215	NA
891	chrII	127746	127752	+	NA	NA	NA	NA	1.97105	NA	NA	NA	NA	0.959644	NA	2.67261	NA	-1.2407	NA	NA	NA	NA	-0.543564	NA	0	NA
892	chrII	130608	130610	+	NA	NA	NA	NA	NA	NA	NA	0.286495	NA	NA	NA	NA	NA	NA	NA	NA	-0.979869	NA	NA	NA	NA	NA
893	chrII	132031	132097	+	YBL046W	mRNA	SGD	inducible	NA	NA	0.475995	4.44067	0.54812	1.39148	NA	5.56794	1.09523	NA	NA	-3.38979	-10.5003	-7.59861	-9.95876	NA	-11.6817	-14.1691
894	chrII	132389	132671	+	YBL046W	mRNA	SGD	constitutive	22.8985	17.6345	32.2883	21.3439	39.0909	25.3826	20.4694	21.3809	34.3596	-18.4031	-17.5274	-27.6276	-25.3921	-18.2179	-28.5439	-23.0509	-31.3534	-29.8992
895	chrII	132727	132934	+	NA	NA	NA	NA	0.617025	NA	1.94365	1.33698	0.82218	1.12758	0.827806	2.59837	3.03098	-17.9523	NA	-21.5012	-20.9939	-17.2505	-19.6917	-19.8453	-21.0688	-23.2313
896	chrII	132998	133196	+	NA	NA	NA	NA	4.31917	2.3656	11.3842	1.90996	5.63069	8.06101	2.40816	8.27768	8.09958	-23.5943	-18.9321	-25.0156	-16.0232	-22.3689	-23.5519	-20.927	-22.7452	-25.8275
897	chrII	133336	133357	+	NA	NA	NA	NA	0.8227	NA	2.30064	NA	1.69419	2.08723	NA	2.11582	1.68105	-2.2218	NA	-0.37602	NA	-3.91731	0	NA	0	-0.479832
898	chrII	136032	136150	+	NA	NA	NA	NA	NA	0.376345	NA	NA	0.398633	NA	NA	NA	5.14502	NA	-12.6522	NA	NA	-12.3659	NA	NA	NA	-25.4788
899	chrII	136268	136431	+	YBL043W	mRNA	SGD	inducible	0.41135	0.75269	NA	NA	0.921838	NA	NA	NA	3.89697	-11.8406	-14.4493	NA	NA	-10.544	NA	NA	NA	-24.0697
900	chrII	136521	136593	+	YBL043W	mRNA	SGD	constitutive	2.93087	2.82259	5.63261	17.5001	41.1588	7.48523	6.43431	20.3416	11.4107	-10.0646	-12.3485	-12.6183	-11.6671	-12.2996	-12.6908	-11.8752	-13.3508	-15.8728
901	chrII	136704	136748	+	NA	NA	NA	NA	NA	NA	NA	0.310369	0.398633	NA	NA	NA	NA	NA	NA	NA	-4.30346	-7.89573	NA	NA	NA	NA
902	chrII	136973	136977	+	NA	NA	NA	NA	NA	NA	0.277664	0.978857	1.59453	NA	NA	0.853751	1.01882	NA	NA	-0.985228	-3.07513	-2.79666	NA	NA	-2.94808	-3.07898
903	chrII	137331	137359	+	NA	NA	NA	NA	NA	NA	NA	NA	NA	NA	NA	NA	0.789582	NA	NA	NA	NA	NA	NA	NA	NA	-8.8573
904	chrII	137860	137876	+	NA	NA	NA	NA	NA	NA	NA	0.381993	0.298975	NA	NA	NA	NA	NA	NA	NA	-6.31774	-3.80735	NA	NA	NA	NA
905	chrII	140458	140470	+	YBL041W	mRNA	SGD	inducible	NA	NA	NA	NA	NA	NA	NA	0.779512	NA	NA	NA	NA	NA	NA	NA	NA	-4.80265	NA
907	chrII	140922	141491	+	YBL041W	mRNA	SGD	constitutive	442.132	334.974	389.998	282.293	263.098	329.998	277.955	328.88	481.365	-17.5325	-16.1361	-18.1957	-30.3011	-17.687	-19.5822	-18.2677	-21.8523	-19.5826
908	chrII	141544	141546	+	NA	NA	NA	NA	NA	NA	NA	NA	NA	NA	NA	NA	0.280174	NA	NA	NA	NA	NA	NA	NA	NA	-0.94566
909	chrII	141598	141683	+	NA	NA	NA	NA	2.94801	0.591399	1.86431	1.2176	0.797266	2.11122	1.54273	0.96511	2.95457	-15.7595	-11.8294	-12.4844	-14.8735	-11.5222	-15.9024	-13.5262	-12.8578	-17.8963
910	chrII	141716	141730	+	NA	NA	NA	NA	0.359931	NA	NA	NA	NA	0.383858	NA	NA	0.229234	-4.42191	NA	NA	NA	NA	-2.46718	NA	NA	-2.56189
911	chrII	142163	142175	+	NA	NA	NA	NA	NA	NA	NA	0.787861	NA	NA	NA	0.927991	NA	NA	NA	NA	-3.06147	NA	NA	NA	-4.33709	NA
912	chrII	143002	143357	+	YBL039W-B	mRNA	SGD	constitutive	62.9879	33.3065	39.3886	57.3228	80.1252	34.2353	40.2991	93.9127	51.9596	-30.6367	-28.649	-30.5757	-32.2271	-33.2655	-28.1378	-29.8674	-32.2047	-31.1538
913	chrII	146071	146235	+	YBL038W	mRNA	SGD	constitutive	57.469	52.3926	115.865	103.448	91.835	89.1749	86.882	114.737	89.8086	-14.2369	-14.3471	-9.77399	-9.3731	-14.7805	-6.72138	-9.37209	-7.26456	-14.6576
914	chrII	146288	146449	+	NA	NA	NA	NA	NA	NA	0.793325	1.55185	0.373718	0.335876	1.05357	1.48479	2.41969	NA	NA	-16.6502	-19.4549	-13.3204	-12.8072	-21.792	-19.8833	-26.3023
915	chrII	146519	146610	+	NA	NA	NA	NA	1.59398	0.215054	1.98331	1.26535	NA	0.503813	0.940689	0.96511	2.52157	-13.7837	-7.70962	-11.877	-10.1486	NA	-9.67931	-12.1665	-14.4411	-13.7901
916	chrII	147004	147007	+	YBL037W	mRNA	SGD	inducible	NA	NA	NA	NA	NA	NA	NA	0.779512	NA	NA	NA	NA	NA	NA	NA	NA	-1.45546	NA
917	chrII	147085	147226	+	YBL037W	mRNA	SGD	constitutive	31.3826	31.1022	48.6705	72.125	49.8042	52.2046	38.794	52.7099	40.0904	-16.1941	-16.1303	-16.4056	-16.6919	-17.9939	-15.8051	-16.867	-16.4053	-19.1298
918	chrII	147262	147266	+	NA	NA	NA	NA	NA	NA	NA	NA	NA	NA	NA	0.296957	NA	NA	NA	NA	NA	NA	NA	NA	-1.90887	NA
919	chrII	147320	147324	+	NA	NA	NA	NA	NA	NA	0.237997	NA	NA	NA	NA	NA	NA	NA	NA	-2	NA	NA	NA	NA	NA	NA
920	chrII	147375	147411	+	NA	NA	NA	NA	NA	NA	NA	NA	NA	NA	NA	0.556794	0.407526	NA	NA	NA	NA	NA	NA	NA	-10.162	-2.84037
921	chrII	147687	147712	+	NA	NA	NA	NA	NA	NA	NA	NA	NA	0.287893	0.263393	NA	NA	NA	NA	NA	NA	NA	-3.32193	-3.94091	NA	NA
922	chrII	149238	149264	+	NA	NA	NA	NA	NA	NA	0.872657	NA	NA	NA	NA	0.408316	0.382056	NA	NA	-7.18464	NA	NA	NA	NA	-6.79677	-3.55399
923	chrII	151420	151499	+	2F-43	XUT	Van_Dijk_2011	NA	0.514187	1.29033	2.14198	7.85473	1.91842	3.57467	1.65561	9.91094	6.74965	-11.643	-9.05736	-13.2551	-14.5096	-12.3701	-8.40242	-11.4364	-9.90457	-14.0408
924	chrII	151993	152023	+	2F-43	XUT	Van_Dijk_2011	NA	NA	NA	NA	NA	NA	NA	NA	0.519675	NA	NA	NA	NA	NA	NA	NA	NA	-7.32409	NA
925	chrII	152739	152750	+	2F-43	XUT	Van_Dijk_2011	NA	NA	NA	NA	0.381993	NA	NA	NA	NA	NA	NA	NA	NA	-3.42034	NA	NA	NA	NA	NA
926	chrII	152806	152828	+	2F-43	XUT	Van_Dijk_2011	NA	NA	NA	NA	0.501366	NA	NA	NA	NA	NA	NA	NA	NA	-7.02412	NA	NA	NA	NA	NA
927	chrII	160055	160156	+	YBL032W	mRNA	SGD	constitutive	26.2921	49.7313	80.8001	35.215	75.9645	45.1513	66.9394	48.3298	68.6936	-12.5543	-13.2608	-10.1897	-9.72242	-10.85	-10.6118	-11.2576	-11.4607	-10.6623
928	chrII	160259	160414	+	NA	NA	NA	NA	0.39421	NA	0.832991	0.549115	0.672693	0.86368	1.84375	0.482555	2.13951	-2.94503	NA	-9.62607	-2.75074	-2.74267	-2.69501	-11.1864	-2.58894	-15.7238
929	chrII	160554	160566	+	NA	NA	NA	NA	NA	NA	0.832991	NA	0.697607	NA	NA	0.334077	0.432997	NA	NA	-5.44572	NA	-5.33536	NA	NA	-3.29206	-5.55155
930	chrII	160646	160810	+	NA	NA	NA	NA	0.719862	NA	2.26098	0.692362	1.29556	0.695742	2.03189	0.408316	3.10739	-11.666	NA	-21.486	-8.99903	-18.8015	-15.3629	-21.3003	-6.84358	-24.4902
931	chrII	160912	161013	+	NA	NA	NA	NA	0.531327	0.403227	1.70565	NA	NA	0.599778	0.451531	0.334077	2.11404	-9.11158	-3.44833	-15.9126	NA	NA	-12.4794	-12.4327	-3.42856	-18.617
932	chrII	161065	161164	+	NA	NA	NA	NA	NA	NA	2.45931	NA	NA	1.3435	0.564413	1.8931	2.72533	NA	NA	-9.44766	NA	NA	-1.04512	-1.44386	-16.3798	-5.24951
933	chrII	161564	161585	+	YBL031W	mRNA	SGD	inducible	NA	NA	NA	NA	NA	0.503813	NA	0.853751	NA	NA	NA	NA	NA	NA	-6.08169	NA	-4.40145	NA
934	chrII	161629	161726	+	YBL031W	mRNA	SGD	constitutive	5.99885	6.37098	11.1065	8.3561	3.51295	7.98904	4.89158	11.5071	5.42519	-13.6201	-14.8726	-14.6712	-14.54	-11.1814	-15.4187	-16.6398	-16.0635	-15.8044
935	chrII	162106	162113	+	NA	NA	NA	NA	NA	NA	NA	NA	NA	NA	NA	0.371196	0.305645	NA	NA	NA	NA	NA	NA	NA	-4.41022	-1.83659
936	chrII	162978	162980	+	NA	NA	NA	NA	NA	NA	NA	0.501366	NA	NA	NA	0.519675	NA	NA	NA	NA	-0.918296	NA	NA	NA	-0.863121	NA
937	chrII	164114	164139	+	NA	NA	NA	NA	NA	NA	NA	NA	NA	NA	NA	2.0787	NA	NA	NA	NA	NA	NA	NA	NA	-7.92952	NA
938	chrII	164452	164459	+	NA	NA	NA	NA	NA	NA	NA	NA	NA	NA	0.338648	NA	NA	NA	NA	NA	NA	NA	NA	-2.57798	NA	NA
939	chrII	164538	164586	+	2F-50	XUT	Van_Dijk_2011	NA	NA	NA	NA	1.36085	NA	0.383858	NA	1.81886	NA	NA	NA	NA	-10.8153	NA	-2.21613	NA	-10.4947	NA
940	chrII	165620	165682	+	YBL029W	mRNA	SGD	inducible	1.09693	1.02151	0.991656	0.477491	NA	1.05561	NA	NA	1.68105	-13.2726	-13.1315	-7.4337	-3.87091	NA	-12.966	NA	NA	-16.8816
941	chrII	166065	166138	+	YBL029W	mRNA	SGD	constitutive	1.45686	8.54841	4.32362	1.83834	2.61603	3.35876	3.04783	5.45659	4.25356	-11.9119	-14.4962	-15.3676	-10.4209	-12.7973	-15.4454	-14.7987	-15.6891	-16.4122
942	chrII	166244	166285	+	NA	NA	NA	NA	0.617025	1.55914	1.46765	2.57845	0.647778	1.8953	1.31696	4.41724	1.68105	-5.75265	-5.84769	-6.37706	-8.50824	-7.32125	-5.67393	-4.43671	-7.57408	-6.25164
943	chrII	166718	166758	+	NA	NA	NA	NA	0.41135	NA	0.674326	0.429742	NA	NA	NA	0.445436	0.687701	-3.16993	NA	-10.4913	-3.3981	NA	NA	NA	-7.77293	-7.59775
944	chrII	166925	166993	+	NA	NA	NA	NA	0.445629	0.322581	NA	3.53344	0.398633	NA	0.338648	1.29919	0.483937	-7.4323	-8.15521	NA	-6.74151	-8.7051	NA	-6.2725	-6.4375	-10.3544
945	chrII	167034	167177	+	NA	NA	NA	NA	20.139	8.73658	7.73492	42.1386	7.6986	16.8178	11.9279	28.6935	20.4018	-23.613	-22.5477	-20.7932	-19.8657	-15.5075	-17.6863	-21.1342	-23.9762	-26.9489
946	chrII	168130	168198	+	YBL027W	mRNA	SGD	inducible	NA	NA	NA	NA	NA	NA	NA	NA	1.01882	NA	NA	NA	NA	NA	NA	NA	NA	-12.6387
947	chrII	168294	168429	+	YBL027W	mRNA	SGD	constitutive	1544.09	2358.12	624.347	153.848	417.518	563.263	1101.25	283.26	851.934	-4.94849	-5.27271	-5.6718	-5.8451	-5.95536	-6.22107	-5.59516	-6.84895	-5.70404
949	chrII	168469	168584	+	NA	NA	NA	NA	1.33689	1.42473	NA	0.358118	NA	0.695742	0.526786	2.00446	1.93575	-13.9073	-15.2608	NA	-12.7846	NA	-10.809	-13.5724	-22.9583	-16.7092
950	chrII	168639	168645	+	NA	NA	NA	NA	NA	NA	NA	NA	NA	NA	NA	0.482555	NA	NA	NA	NA	NA	NA	NA	NA	-3.76698	NA
952	chrII	168809	169193	+	NA	NA	NA	NA	146.149	99.8927	41.6099	11.1733	27.1818	55.7553	86.3552	15.813	75.7489	-34.1846	-30.4013	-30.0586	-27.8556	-29.4487	-30.1145	-33.5917	-31.6782	-32.5685
953	chrII	169348	169372	+	NA	NA	NA	NA	NA	NA	NA	NA	NA	NA	NA	NA	1.01882	NA	NA	NA	NA	NA	NA	NA	NA	-7.52781
954	chrII	169677	169694	+	YBL026W	mRNA	SGD	inducible	NA	NA	NA	NA	NA	NA	NA	NA	0.63676	NA	NA	NA	NA	NA	NA	NA	NA	-7.43382
955	chrII	169759	169781	+	YBL026W	mRNA	SGD	inducible	NA	NA	NA	NA	NA	NA	NA	0.371196	0.356586	NA	NA	NA	NA	NA	NA	NA	-3.74366	-5.1711
956	chrII	170205	170415	+	YBL026W	mRNA	SGD	inducible	2.50238	1.4785	NA	1.07436	4.4597	0.43184	0.714923	1.11359	0.432997	-23.1569	-19.7672	NA	-19.9975	-26.0784	-7.99597	-19.493	-20.1227	-19.1458
957	chrII	170473	170669	+	YBL026W	mRNA	SGD	constitutive	107.105	134.758	59.4994	44.2634	76.6372	62.4968	102.422	58.0551	55.3726	-19.9517	-20.7037	-18.7822	-17.5158	-18.8965	-17.7005	-19.4661	-19.0262	-19.3625
958	chrII	170846	170886	+	NA	NA	NA	NA	NA	NA	NA	NA	NA	NA	NA	0.631034	NA	NA	NA	NA	NA	NA	NA	NA	-10.2862	NA
959	chrII	171185	171195	+	YBL025W	mRNA	SGD	inducible	NA	NA	NA	NA	NA	NA	NA	0.259837	NA	NA	NA	NA	NA	NA	NA	NA	-3.27286	NA
960	chrII	171262	171266	+	YBL025W	mRNA	SGD	inducible	NA	NA	NA	NA	NA	NA	NA	0.222718	NA	NA	NA	NA	NA	NA	NA	NA	-2	NA
962	chrII	171343	171508	+	YBL025W	mRNA	SGD	constitutive	21.9215	12.6613	20.5074	33.1856	37.3718	22.6236	20.9585	38.1219	27.992	-18.5388	-19.2788	-19.4607	-18.5349	-18.53	-17.7917	-19.3389	-19.5627	-19.3669
963	chrII	171547	171838	+	NA	NA	NA	NA	2.94801	2.74194	1.90398	7.01912	6.5027	3.21481	5.1926	7.05273	6.31666	-25.3433	-17.4426	-19.1963	-25.5672	-23.6211	-25.7549	-25.6955	-29.725	-26.3359
964	chrII	171950	171964	+	YBL024W	mRNA	SGD	inducible	0.497048	NA	NA	0.429742	0.373718	NA	NA	0.445436	1.1207	-3.55724	NA	NA	-3.58496	-3.57346	NA	NA	-5.37744	-5.59318
965	chrII	172421	172567	+	YBL024W	mRNA	SGD	constitutive	73.066	107.178	95.913	35.0001	36.0763	68.5906	115.629	56.1249	89.07	-9.39583	-10.7499	-5.4762	-6.97397	-9.90402	-6.93075	-6.71487	-8.06003	-13.1415
966	chrII	172643	172691	+	NA	NA	NA	NA	NA	0.215054	NA	NA	NA	0.239911	NA	0.259837	0.458467	NA	-1	NA	NA	NA	-1	NA	-1.56155	-7.31237
967	chrII	173101	173120	+	NA	NA	NA	NA	NA	NA	NA	NA	NA	NA	0.225765	NA	NA	NA	NA	NA	NA	NA	NA	-4.24793	NA	NA
968	chrII	173415	173418	+	NA	NA	NA	NA	1.474	NA	0.396662	NA	0.473376	NA	1.12883	NA	0.63676	-1.55699	NA	-0.970951	NA	-0.981941	NA	0	NA	-0.721928
969	chrII	173488	173597	+	NA	NA	NA	NA	1.07979	0.698927	2.06264	NA	NA	1.58341	0.714923	0.890871	1.96122	-16.3237	-16.5444	-19.7211	NA	NA	-19.0748	-15.3982	-14.6422	-15.6744
970	chrII	173708	173711	+	NA	NA	NA	NA	0.274233	NA	0.277664	NA	NA	NA	0.677296	NA	NA	-0.988699	NA	-0.985228	NA	NA	NA	-2.45135	NA	NA
971	chrII	174000	174164	+	NA	NA	NA	NA	1.79966	1.50538	3.72863	NA	0.348804	1.15157	3.19834	1.29919	2.90362	-13.2736	-14.143	-21.4396	NA	-9.1308	-7.09274	-14.3483	-12.0121	-9.46449
972	chrII	176477	176478	+	NA	NA	NA	NA	NA	NA	NA	2.29196	NA	NA	NA	NA	NA	NA	NA	NA	0	NA	NA	NA	NA	NA
973	chrII	177274	177283	+	NA	NA	NA	NA	NA	NA	NA	NA	NA	NA	NA	0.222718	NA	NA	NA	NA	NA	NA	NA	NA	-3.16993	NA
974	chrII	181571	181644	+	YBL020W	mRNA	SGD	constitutive	0.719862	0.833335	2.53864	4.46454	2.09282	1.05561	1.20408	3.15517	5.52708	-6.93242	-8.68236	-11.0948	-11.4686	-7.06844	-8.53854	-10.5625	-11.5107	-12.2539
975	chrII	181754	181772	+	YBL020W	mRNA	SGD	inducible	NA	NA	NA	NA	NA	NA	NA	0.259837	NA	NA	NA	NA	NA	NA	NA	NA	-4.10833	NA
976	chrII	182284	182362	+	YBL020W	mRNA	SGD	constitutive	28.7945	36.5592	27.2507	24.3043	23.6937	30.7806	24.1193	18.5598	19.5613	-10.6567	-13.0681	-16.4337	-14.7001	-13.7059	-16.6272	-15.7456	-16.8571	-15.5383
977	chrII	182465	182487	+	NA	NA	NA	NA	0.325652	NA	NA	NA	NA	NA	0.451531	NA	NA	-3.88863	NA	NA	NA	NA	NA	-6.93257	NA	NA
978	chrII	182636	182646	+	NA	NA	NA	NA	NA	NA	NA	NA	NA	NA	NA	0.296957	NA	NA	NA	NA	NA	NA	NA	NA	-3.17056	NA
979	chrII	183026	183029	+	NA	NA	NA	NA	0.39421	0.241936	0.31733	0.310369	NA	0.527804	NA	NA	NA	-1.31244	-0.991076	-0.954434	-0.961237	NA	-1.22554	NA	NA	NA
980	chrII	184261	184403	+	YBL019W	mRNA	SGD	constitutive	6.44448	6.07528	8.36958	12.4386	9.7665	5.46997	8.95536	12.6578	8.60899	-22.8797	-19.6106	-21.7078	-24.6641	-17.7178	-19.6919	-20.3309	-25.4212	-18.4615
981	chrII	184473	184618	+	NA	NA	NA	NA	1.26833	0.967744	2.57831	5.61052	2.86517	2.08723	1.99426	5.23387	4.35544	-17.3024	-13.3528	-20.4919	-22.3972	-14.6799	-13.844	-20.0222	-25.9878	-23.4075
982	chrII	184671	184804	+	NA	NA	NA	NA	1.30261	0.725808	0.832991	2.9127	1.89351	0.86368	1.42985	3.19229	2.57251	-14.1756	-16.1063	-13.5416	-15.4226	-16.7581	-9.87046	-18.5885	-19.315	-17.202
983	chrII	185014	185049	+	NA	NA	NA	NA	NA	NA	NA	0.286495	NA	NA	NA	0.927991	NA	NA	NA	NA	-4.39232	NA	NA	NA	-9.19418	NA
984	chrII	185120	185127	+	NA	NA	NA	NA	NA	NA	NA	NA	NA	NA	NA	0.222718	NA	NA	NA	NA	NA	NA	NA	NA	-2.80735	NA
985	chrII	185223	185243	+	NA	NA	NA	NA	NA	NA	0.396662	0.978857	NA	NA	0.225765	0.556794	0.534878	NA	NA	-6.78954	-7.95227	NA	NA	-4.24793	-6.29517	-6.45571
986	chrII	191472	191546	+	YBL016W	mRNA	SGD	inducible	NA	NA	NA	0.381993	NA	NA	NA	1.33631	NA	NA	NA	NA	-9.45848	NA	NA	NA	-14.9602	NA
987	chrII	191859	192167	+	YBL016W	mRNA	SGD	constitutive	0.668443	1.80108	3.33196	5.3479	8.62043	9.83635	2.33291	10.1708	13.3974	-16.3442	-16.7606	-18.8397	-18.7078	-27.5208	-20.521	-19.7821	-21.7895	-20.7718
989	chrII	192340	192569	+	YBL016W	mRNA	SGD	constitutive	372.906	28.8173	123.719	68.0664	40.0128	72.6211	77.0236	106.682	37.9509	-9.30107	-20.3593	-12.7836	-18.7463	-19.9902	-13.9343	-19.1783	-13.1564	-22.0202
990	chrII	192618	192649	+	NA	NA	NA	NA	0.257094	NA	NA	NA	0.373718	NA	NA	0.259837	NA	-2.57667	NA	NA	NA	-3.35894	NA	NA	-3.40833	NA
991	chrII	192714	192758	+	NA	NA	NA	NA	0.651304	NA	0.872657	NA	NA	NA	NA	NA	NA	-8.35473	NA	-10.2522	NA	NA	NA	NA	NA	NA
992	chrII	193020	193130	+	NA	NA	NA	NA	2.34812	NA	0.63466	NA	NA	NA	0.376275	NA	0.356586	-13.6153	NA	-6.42227	NA	NA	NA	-2.4741	NA	-3.12356
993	chrII	193199	193413	+	NA	NA	NA	NA	4.81622	NA	1.58665	5.99251	0.473376	0.407849	2.14477	1.7075	0.942405	-25.5912	NA	-23.3137	-11.4604	-13.8038	-10.7305	-23.5033	-16.5125	-19.4252
994	chrII	193676	193688	+	YBL015W	mRNA	SGD	inducible	NA	NA	NA	1.24148	0.298975	NA	NA	NA	1.47728	NA	NA	NA	-4.28298	-2.27518	NA	NA	NA	-7.35467
995	chrII	193901	193979	+	YBL015W	mRNA	SGD	inducible	NA	NA	NA	1.16985	0.249145	NA	NA	NA	2.69986	NA	NA	NA	-4.84382	-6.40631	NA	NA	NA	-13.3123
996	chrII	194005	194088	+	YBL015W	mRNA	SGD	constitutive	18.0994	32.527	70.6059	423.726	136.357	32.7719	80.1843	50.7797	81.3015	-11.2101	-11.8268	-12.2401	-6.01095	-8.56853	-11.758	-13.1039	-10.5094	-14.4227
997	chrII	194113	194449	+	NA	NA	NA	NA	NA	0.537636	5.83094	12.8445	9.61702	0.671751	6.32143	7.12697	5.39972	NA	-17.964	-26.9971	-33.8006	-26.1702	-21.1492	-32.4628	-22.2146	-31.3015
998	chrII	194581	194596	+	NA	NA	NA	NA	NA	NA	0.396662	2.12484	NA	NA	0.639668	NA	0.305645	NA	NA	-1.58496	-4.95373	NA	NA	-1.54917	NA	-1.58496
999	chrII	194817	194828	+	NA	NA	NA	NA	NA	NA	0.396662	NA	NA	NA	NA	NA	NA	NA	NA	-5.4346	NA	NA	NA	NA	NA	NA
1000	chrII	194984	194986	+	NA	NA	NA	NA	NA	NA	NA	0.381993	0.27406	NA	NA	NA	NA	NA	NA	NA	-1	-0.99403	NA	NA	NA	NA
1001	chrII	195112	195140	+	NA	NA	NA	NA	NA	NA	0.31733	1.79059	NA	NA	NA	NA	NA	NA	NA	-0.954434	-9.13916	NA	NA	NA	NA	NA
1002	chrII	195193	195242	+	NA	NA	NA	NA	NA	NA	0.356996	1.4086	0.423547	NA	NA	0.408316	0.585819	NA	NA	-1.45546	-9.65652	-1.54917	NA	NA	-1.49884	-6.28711
1003	chrII	195280	195308	+	NA	NA	NA	NA	NA	NA	0.555327	2.88882	1.27064	0.551795	0.865434	0.556794	1.01882	NA	NA	-5.1711	-6.01461	-4.89698	-5.15063	-6.86378	-5.08297	-5.11408
1004	chrII	195435	195560	+	NA	NA	NA	NA	0.325652	NA	2.37997	6.54163	6.62727	1.03162	1.80612	1.11359	2.16498	-3.52022	NA	-9.90455	-9.4903	-11.071	-7.9358	-4.06481	-5.94532	-11.3015
1005	chrII	196085	196197	+	NA	NA	NA	NA	NA	NA	NA	1.83834	2.79043	NA	NA	NA	0.356586	NA	NA	NA	-13.3049	-17.6367	NA	NA	NA	-2.73603
1006	chrII	196292	196406	+	SUT007	SUT	Xu_2009	NA	1.86821	2.09678	1.34865	12.0805	7.72351	1.70337	1.99426	5.60506	2.44516	-9.17809	-9.22071	-9.96307	-13.5622	-18.6279	-14.8248	-5.91968	-12.8658	-16.0511
1007	chrII	196694	196713	+	SUT007	SUT	Xu_2009	NA	NA	0.376345	0.396662	NA	2.14265	0.479822	4.44005	0.853751	NA	NA	-1.72624	-1.9419	NA	-8.81527	-3.24511	-10.5128	-9.70707	NA
1008	chrII	197932	198135	+	NA	NA	NA	NA	85.7493	NA	NA	NA	NA	NA	NA	1.41055	NA	0	NA	NA	NA	NA	NA	NA	0	NA
1009	chrII	198470	198486	+	NA	NA	NA	NA	NA	NA	NA	NA	NA	NA	NA	NA	0.254704	NA	NA	NA	NA	NA	NA	NA	NA	-4
1010	chrII	198566	198573	+	NA	NA	NA	NA	NA	NA	NA	NA	NA	NA	NA	0.631034	NA	NA	NA	NA	NA	NA	NA	NA	-2.20974	NA
1011	chrII	198911	198931	+	NA	NA	NA	NA	NA	NA	NA	0.429742	0.498291	NA	NA	NA	NA	NA	NA	NA	-4.16668	-6.83423	NA	NA	NA	NA
1012	chrII	201977	202088	+	YBL013W	mRNA	SGD	constitutive	0.462769	1.61291	6.54493	15.9243	5.18223	4.82221	3.34885	8.27768	6.08742	-10.4922	-15.8391	-14.4974	-19.1753	-17.4504	-14.6322	-13.1016	-14.422	-16.5811
1013	chrII	202569	202626	+	NA	NA	NA	NA	1.14835	1.66667	3.33196	5.75377	4.60919	2.44709	1.65561	3.00669	4.04979	-3.25597	-5.06577	-8.18378	-10.864	-6.01889	-5.87687	-7.78571	-4.6315	-11.0269
1014	chrII	202814	202817	+	NA	NA	NA	NA	NA	NA	NA	0.596864	NA	NA	NA	NA	0.382056	NA	NA	NA	-1.35586	NA	NA	NA	NA	-1.53892
1015	chrII	202987	202991	+	NA	NA	NA	NA	NA	NA	NA	NA	NA	NA	NA	0.222718	NA	NA	NA	NA	NA	NA	NA	NA	-2	NA
1016	chrII	203339	203379	+	YBL011W	mRNA	SGD	inducible	NA	0.376345	NA	2.33971	0.523206	0.503813	NA	0.853751	1.22258	NA	-7.90559	NA	-13.015	-2.86722	-6.33431	NA	-8.89006	-10.6057
1017	chrII	203418	203676	+	YBL011W	mRNA	SGD	constitutive	12.7861	19.6237	34.5096	70.5016	26.8579	28.1896	36.7245	39.718	36.4991	-21.074	-17.2902	-28.0201	-30.5089	-27.0281	-29.4814	-26.2263	-35.3862	-29.3382
1018	chrII	203749	203799	+	NA	NA	NA	NA	NA	NA	NA	0.668488	NA	NA	NA	0.222718	0.280174	NA	NA	NA	-10.8204	NA	NA	NA	-4	-8.72642
1019	chrII	203917	203920	+	NA	NA	NA	NA	NA	NA	0.793325	1.81447	0.448462	1.48745	0.827806	NA	1.40087	NA	NA	-0.721928	-1.72283	-0.852405	-0.770629	-0.574636	NA	-0.63431
1020	chrII	203979	203996	+	NA	NA	NA	NA	NA	NA	0.436329	0.310369	0.473376	NA	NA	NA	0.382056	NA	NA	-3.86535	-4.07	-4.01365	NA	NA	NA	-4.07435
1021	chrII	204067	204095	+	NA	NA	NA	NA	NA	NA	NA	NA	NA	NA	0.413903	0.296957	0.356586	NA	NA	NA	NA	NA	NA	-6.53962	-3.17056	-3.92092
1022	chrII	204273	204345	+	NA	NA	NA	NA	NA	NA	2.10231	1.52797	NA	1.0796	1.31696	1.18783	1.78293	NA	NA	-14.7964	-14.7499	NA	-12.6066	-13.4942	-13.5162	-12.8279
1023	chrII	204444	204448	+	NA	NA	NA	NA	NA	NA	NA	0.238746	NA	NA	NA	NA	NA	NA	NA	NA	-2	NA	NA	NA	NA	NA
1024	chrII	204557	204571	+	NA	NA	NA	NA	NA	NA	0.991656	0.692362	0.722522	0.671751	0.602041	0.742393	0.891464	NA	NA	-0.63431	-0.735509	-0.663197	-0.985228	-0.696212	-7.0036	-0.721928
1025	chrII	205012	205034	+	NA	NA	NA	NA	NA	NA	0.912323	NA	NA	0.671751	0.413903	0.705273	1.40087	NA	NA	-3.81034	NA	NA	-3.95659	-2.7906	-3.8034	-12.2124
1026	chrII	205169	205385	+	NA	NA	NA	NA	0.222814	0.2957	5.35494	2.36358	4.53445	1.79933	2.89732	2.93245	3.64227	-16.3563	-16.6611	-25.6715	-19.2164	-23.8228	-16.4489	-23.2373	-22.6217	-25.0818
1027	chrII	205736	205752	+	NA	NA	NA	NA	NA	0.537636	NA	NA	NA	NA	NA	NA	NA	NA	-5.75503	NA	NA	NA	NA	NA	NA	NA
1028	chrII	206076	206084	+	NA	NA	NA	NA	NA	NA	NA	0.286495	NA	NA	NA	NA	0.483937	NA	NA	NA	-2.93961	NA	NA	NA	NA	-4.70495
1029	chrII	207140	207176	+	YBL009W	mRNA	SGD	constitutive	2.48524	2.31183	4.83928	1.05048	1.32047	2.99889	3.95089	2.22718	2.11404	-11.1785	-11.6642	-8.61377	-7.19522	-11.9774	-6.37022	-8.58143	-7.06248	-11.1126
1030	chrII	207749	207756	+	NA	NA	NA	NA	0.325652	NA	NA	NA	NA	NA	0.30102	NA	NA	-2.3258	NA	NA	NA	NA	NA	-0.954434	NA	NA
1031	chrII	209527	209630	+	YBL008W	mRNA	SGD	constitutive	13.0604	7.76884	15.5888	18.5267	4.55936	13.603	8.99298	18.7083	11.3853	-11.6186	-12.1539	-11.6275	-11.0068	-11.1475	-7.87187	-12.0713	-8.58776	-14.6981
1032	chrII	209739	209779	+	NA	NA	NA	NA	0.942677	0.241936	1.11065	1.79059	0.473376	0.719733	1.16645	0.816632	0.993345	-9.15113	-3.66742	-7.99452	-2.81027	-3.00969	-2.28846	-3.1231	-2.6797	-6.10157
1033	chrII	209979	209986	+	NA	NA	NA	NA	0.582746	NA	NA	0.477491	NA	0.527804	0.413903	0.705273	0.993345	-1.24757	NA	NA	-1.28585	NA	-1.22554	-1.33985	-3.9387	-1.07612
1034	chrII	210203	210206	+	NA	NA	NA	NA	NA	NA	NA	NA	NA	NA	0.30102	NA	NA	NA	NA	NA	NA	NA	NA	-1.58496	NA	NA
1035	chrII	210621	210626	+	NA	NA	NA	NA	NA	NA	0.277664	NA	NA	NA	NA	0.259837	NA	NA	NA	-1.97046	NA	NA	NA	NA	-0.985228	NA
1036	chrII	212279	212285	+	NA	NA	NA	NA	NA	NA	NA	NA	NA	NA	NA	0.222718	NA	NA	NA	NA	NA	NA	NA	NA	-2.58496	NA
1037	chrII	215858	215860	+	YBL006W-A	mRNA	SGD	inducible	NA	NA	NA	NA	NA	0.479822	NA	0.705273	NA	NA	NA	NA	NA	NA	-0.811278	NA	-0.831474	NA
1038	chrII	216540	216559	+	YBL006W-A	mRNA	SGD	inducible	NA	NA	NA	1.14598	NA	0.383858	NA	0.445436	NA	NA	NA	NA	-5.41222	NA	-3.41154	NA	-3.08882	NA
1039	chrII	216625	216746	+	YBL006W-A	mRNA	SGD	inducible	0.428489	NA	0.63466	0.26262	1.7191	2.30315	NA	1.5219	2.64892	-2.95937	NA	-8.3228	-11.7729	-16.5066	-7.58121	NA	-4.50289	-18.2602
1040	chrII	216801	216914	+	NA	NA	NA	NA	0.205675	1.10215	1.82465	6.13576	1.56962	1.31951	0.903061	4.82555	2.24139	-4.24793	-9.04173	-19.8402	-23.2151	-14.9706	-13.3338	-17.419	-22.7456	-19.3274
1041	chrII	217350	217722	+	YBL005W	mRNA	SGD	constitutive	19.9162	21.3979	29.3133	44.3828	23.3698	36.8263	23.442	41.7596	35.684	-16.4609	-21.8591	-25.8745	-31.8629	-23.8049	-25.4228	-27.3956	-33.9146	-24.2295
1042	chrII	217766	217807	+	NA	NA	NA	NA	NA	NA	1.74531	0.907233	0.573035	0.599778	0.639668	1.26207	0.891464	NA	NA	-6.74039	-4.59417	-1.95262	-2.05515	-2.25921	-4.345	-4.59534
1043	chrII	218204	218260	+	NA	NA	NA	NA	NA	NA	0.713992	NA	NA	0.335876	NA	NA	0.203763	NA	NA	-11.0128	NA	NA	-8.96285	NA	NA	-4.16993
1044	chrII	219022	219037	+	NA	NA	NA	NA	NA	NA	NA	NA	NA	NA	NA	0.334077	NA	NA	NA	NA	NA	NA	NA	NA	-6.19228	NA
1045	chrII	219144	219148	+	NA	NA	NA	NA	NA	NA	NA	NA	NA	NA	NA	0.222718	NA	NA	NA	NA	NA	NA	NA	NA	-2	NA
1046	chrII	220037	220067	+	NA	NA	NA	NA	NA	NA	NA	0.26262	NA	0.263902	NA	0.445436	NA	NA	NA	NA	-3.97612	NA	-3.97612	NA	-7.62818	NA
1047	chrII	220175	220177	+	NA	NA	NA	NA	NA	NA	NA	NA	NA	NA	NA	0.222718	NA	NA	NA	NA	NA	NA	NA	NA	-1	NA
1048	chrII	220863	220978	+	NA	NA	NA	NA	13.7802	9.62368	5.11694	5.72989	13.404	3.69463	9.44451	3.67484	9.27122	-22.5064	-20.1615	-16.3109	-18.3561	-22.7798	-16.8044	-18.5347	-18.3273	-18.9928
1049	chrII	221275	221364	+	YBLWTy1-1	LTR_retrotransposon	SGD	NA	1.01123	2.3656	10.5512	14.1576	2.5662	5.03813	11.9279	12.1381	2.64892	-17.0476	-13.4211	-23.5235	-24.9665	-20.3296	-19.5014	-22.3389	-25.0884	-19.7866
1050	chrII	221431	221504	+	YBLWTy1-1	LTR_retrotransposon	SGD	NA	3.89068	3.44087	19.9918	41.6611	12.1334	15.2823	19.9426	19.8961	15.5879	-10.6805	-11.5258	-13.2107	-12.4026	-12.2633	-13.7035	-12.5051	-12.5753	-12.8026
1051	chrII	222097	222169	+	YBLWTy1-1	LTR_retrotransposon	SGD	NA	NA	NA	1.86431	1.28923	0.573035	0.599778	1.46747	2.0787	0.483937	NA	NA	-15.0967	-13.4778	-3.42262	-3.54386	-5.28593	-14.0004	-0.742488
1052	chrII	222636	222688	+	YBLWTy1-1	LTR_retrotransposon	SGD	NA	1.57684	2.31183	10.8289	2.24421	3.61261	5.06212	7.33737	12.0639	4.15167	-16.3292	-16.3453	-19.1608	-15.168	-17.8733	-17.0771	-19.0823	-19.1441	-17.623
1053	chrII	224715	224778	+	YBLWTy1-1	LTR_retrotransposon	SGD	NA	2.63949	3.60216	14.6368	2.6262	5.40646	11.6597	15.6154	18.0773	8.37976	0	0	-1.61987	-1.52719	0	0	0	-0.140144	0
1054	chrII	225279	225340	+	YBLWTy1-1	LTR_retrotransposon	SGD	NA	NA	NA	NA	NA	NA	NA	0.639668	0.408316	NA	NA	NA	NA	NA	NA	NA	-13.6833	-13.3001	NA
1055	chrII	225464	225531	+	YBLWTy1-1	LTR_retrotransposon	SGD	NA	1.57684	2.04302	7.17959	1.45635	2.06791	4.48634	6.35906	12.8063	2.19045	-6.64529	-6.99586	-11.2952	-11.891	-11.4222	-12.8697	-10.4438	-14.9202	-4.6332
1056	chrII	226200	226269	+	YBLWTy1-1	LTR_retrotransposon	SGD	NA	5.57036	9.03228	26.854	4.98978	11.4109	23.8951	24.6837	41.2028	13.0663	-1.37	-1.40592	-1.27855	-1.30768	-1.42518	-1.35934	-1.41304	-1.35937	-1.31709
1057	chrII	227498	227636	+	YBL004W	mRNA	SGD	constitutive	60.7427	101.506	43.9502	30.8937	29.8725	72.5491	63.3272	39.8665	26.9986	-22.6505	-23.5411	-21.4078	-20.8653	-21.0806	-23.0202	-23.545	-21.0486	-22.9319
1058	chrII	227828	227840	+	NA	NA	NA	NA	NA	NA	NA	NA	NA	0.64776	NA	NA	NA	NA	NA	NA	NA	NA	-5.11421	NA	NA	NA
1059	chrII	227965	227986	+	NA	NA	NA	NA	NA	NA	NA	NA	NA	NA	NA	0.371196	NA	NA	NA	NA	NA	NA	NA	NA	-4.39232	NA
1060	chrII	228085	228102	+	NA	NA	NA	NA	0.891258	0.45699	0.31733	0.596864	0.473376	1.24754	1.12883	0.705273	0.66223	-1	-0.936667	-0.954434	-5.26501	-0.981941	-0.947062	-2.16839	-6.22973	-2.31481
1061	chrII	228263	228329	+	NA	NA	NA	NA	NA	NA	NA	NA	NA	2.51907	NA	NA	0.280174	NA	NA	NA	NA	NA	-13.4178	NA	NA	-11.2648
1062	chrII	228841	228874	+	NA	NA	NA	NA	NA	0.322581	NA	NA	NA	NA	0.413903	NA	NA	NA	-3.58768	NA	NA	NA	NA	-7.93293	NA	NA
1063	chrII	229931	229933	+	NA	NA	NA	NA	0.291373	NA	0.237997	NA	NA	NA	NA	NA	NA	-0.997503	NA	-1	NA	NA	NA	NA	NA	NA
1064	chrII	230362	230388	+	NA	NA	NA	NA	NA	0.510754	NA	NA	NA	NA	NA	NA	NA	NA	-7.18899	NA	NA	NA	NA	NA	NA	NA
1065	chrII	230543	230548	+	NA	NA	NA	NA	NA	0.241936	NA	NA	NA	NA	NA	NA	NA	NA	-2.30121	NA	NA	NA	NA	NA	NA	NA
1066	chrII	231624	231667	+	NA	NA	NA	NA	NA	1.69355	0.515661	NA	NA	0.911662	NA	0.296957	NA	NA	-11.8429	-7.70387	NA	NA	-9.92334	NA	-8.1394	NA
1067	chrII	231966	232047	+	NA	NA	NA	NA	NA	0.376345	0.515661	NA	NA	0.455831	NA	0.259837	NA	NA	-12.5683	-11.4855	NA	NA	-8.26896	NA	-11.0376	NA
1068	chrII	232173	232175	+	NA	NA	NA	NA	NA	0.322581	NA	NA	NA	NA	NA	NA	NA	NA	-0.918296	NA	NA	NA	NA	NA	NA	NA
1069	chrII	232610	232635	+	NA	NA	NA	NA	0.274233	0.349463	NA	NA	NA	NA	NA	NA	NA	-0.954434	-1.52352	NA	NA	NA	NA	NA	NA	NA
1070	chrII	232860	232892	+	NA	NA	NA	NA	NA	NA	0.356996	1.1221	NA	NA	NA	0.593914	NA	NA	NA	-3.42856	-9.08454	NA	NA	NA	-7.58466	NA
1071	chrII	233030	233032	+	NA	NA	NA	NA	NA	0.940863	NA	NA	NA	NA	NA	NA	NA	NA	-0.512709	NA	NA	NA	NA	NA	NA	NA
1072	chrII	234244	234246	+	NA	NA	NA	NA	NA	NA	NA	NA	NA	NA	0.639668	NA	NA	NA	NA	NA	NA	NA	NA	-0.672295	NA	NA
1073	chrII	234331	234386	+	NA	NA	NA	NA	0.41135	1.88173	1.46765	NA	NA	2.13521	1.01594	NA	NA	-8.38688	-5.26744	-5.55273	NA	NA	-6.22931	-9.25527	NA	NA
1074	chrII	234651	234713	+	NA	NA	NA	NA	0.41135	2.15054	0.237997	NA	NA	1.17556	NA	NA	NA	-9.28463	-11.5933	-6.42458	NA	NA	-8.78146	NA	NA	NA
1075	chrII	234774	234777	+	NA	NA	NA	NA	2.69091	5.88711	2.30064	NA	1.49487	2.18319	2.29528	1.37343	1.45181	-0.716803	-0.929058	-0.70075	NA	-0.783777	-0.694757	-0.804718	-0.800392	-0.804252
1076	chrII	236023	236060	+	YBL002W	mRNA	SGD	inducible	1.79966	0.591399	NA	0.954982	0.398633	1.05561	NA	1.29919	0.66223	-6.74969	-8.87768	NA	-5.02015	-7.08447	-6.32618	NA	-4.1463	-8.97744
1078	chrII	236277	236796	+	YBL002W	mRNA	SGD	constitutive	34.6219	284.356	192.897	96.0474	141.938	235.377	177.828	183.891	217.645	-20.0024	-16.7491	-9.31724	-12.0656	-12.3993	-9.19545	-9.23976	-9.08324	-18.2509
1079	chrII	236851	236856	+	NA	NA	NA	NA	NA	1.4785	NA	0.453617	0.797266	0.86368	0.827806	NA	1.24805	NA	-1.73979	NA	-1.66295	-1.39242	-2.7904	-3.13852	NA	-1.18335
1080	chrII	237124	237244	+	NA	NA	NA	NA	NA	NA	NA	0.501366	NA	NA	0.225765	1.55902	0.356586	NA	NA	NA	-14.9207	NA	NA	-3	-22.2531	-12.8517
1081	chrII	237722	237737	+	NA	NA	NA	NA	NA	NA	NA	NA	NA	NA	NA	NA	0.458467	NA	NA	NA	NA	NA	NA	NA	NA	-3.90689
1082	chrII	238438	238538	+	2F-78	XUT	Van_Dijk_2011	NA	10.0952	5.13442	6.06893	13.2504	4.958	8.66079	7.22449	24.0906	1.40087	-15.7058	-13.9325	-16.3238	-12.1776	-14.5303	-11.7497	-13.962	-11.9842	-10.3997
1083	chrII	241646	241699	+	SUT009	SUT	Xu_2009	NA	1.14835	1.74732	1.58665	13.8711	7.74842	3.16683	2.06952	5.45659	9.70422	-4.56547	-9.14511	-5.08265	-9.04544	-9.61495	-5.92111	-9.20277	-7.15899	-12.5081
1084	chrII	241738	241747	+	SUT009	SUT	Xu_2009	NA	NA	NA	NA	NA	NA	NA	NA	NA	0.229234	NA	NA	NA	NA	NA	NA	NA	NA	-3.14164
1085	chrII	242326	242332	+	YBR003W	mRNA	SGD	inducible	NA	NA	NA	NA	NA	NA	NA	0.408316	NA	NA	NA	NA	NA	NA	NA	NA	-2.1852	NA
1086	chrII	242762	242837	+	YBR003W	mRNA	SGD	constitutive	59.9714	50.5109	88.1384	83.1073	84.0119	65.1359	64.9075	79.1019	78.4998	-13.3042	-13.4021	-13.9214	-13.6004	-12.7217	-14.1432	-14.4216	-13.8884	-11.4235
1087	chrII	242903	243066	+	NA	NA	NA	NA	2.09103	0.564518	4.08562	2.84107	2.7406	3.33476	2.82207	3.00669	4.61014	-17.5591	-12.6414	-21.0274	-20.6537	-22.0853	-21.7583	-19.5998	-23.6373	-19.9734
1088	chrII	243116	243165	+	NA	NA	NA	NA	NA	0.215054	0.674326	0.238746	NA	0.599778	0.526786	2.37566	0.356586	NA	-4	-8.93792	-7.9084	NA	-10.8025	-12.8466	-11.4002	-5.1711
1089	chrII	243316	243319	+	NA	NA	NA	NA	NA	NA	0.277664	NA	0.498291	NA	0.263393	NA	0.432997	NA	NA	-0.985228	NA	-0.881291	NA	-0.985228	NA	-2.41261
1090	chrII	243468	243471	+	NA	NA	NA	NA	1.07979	NA	NA	1.02661	NA	1.12758	0.903061	0.668153	1.45181	0	NA	NA	-0.821914	NA	0	-1.03026	-1.03026	0
1091	chrII	243707	243709	+	NA	NA	NA	NA	0.599885	NA	0.793325	0.429742	0.597949	NA	0.338648	NA	0.738641	-0.927527	NA	-0.992774	-0.991076	-0.954434	NA	-0.918296	NA	-0.978449
1092	chrII	244050	244052	+	NA	NA	NA	NA	NA	NA	NA	NA	NA	NA	NA	NA	0.254704	NA	NA	NA	NA	NA	NA	NA	NA	-0.970951
1094	chrII	245811	246032	+	YBR005W	mRNA	SGD	constitutive	94.679	60.2959	113.921	193.097	124.971	211.722	49.1039	244.062	102.773	-25.7271	-23.991	-23.3879	-18.9035	-20.6601	-19.4264	-26.4089	-19.9335	-24.6607
1095	chrII	246099	246152	+	NA	NA	NA	NA	2.43382	1.07527	2.45931	4.24967	1.94333	6.45361	1.01594	4.45436	3.54038	-4.51648	-2.38554	-3.19507	-3.15159	-4.52582	-5.29933	-2.63852	-8.06683	-6.45774
1096	chrII	246270	246291	+	NA	NA	NA	NA	1.86821	1.31721	2.30064	1.55185	2.34197	3.88656	0.978316	1.93022	2.77627	-2.74938	-3.00918	-1.56639	-2.6947	-2.87531	-1.53766	-2.60039	-2.97743	-2.78457
1097	chrII	246812	246994	+	YBR006W	mRNA	SGD	constitutive	95.4503	102.312	176.158	102.35	146.697	98.9873	179.86	132.406	254.551	-18.6953	-18.4809	-19.9623	-21.2028	-17.7694	-19.6376	-18.3719	-20.1755	-19.3036
1098	chrII	247082	247259	+	NA	NA	NA	NA	9.10111	3.79033	15.4302	8.30835	9.79142	9.86035	17.3087	9.57686	32.271	-5.26494	-12.5202	-12.509	-9.39003	-6.73046	-8.9846	-10.5012	-11.4111	-10.8635
1099	chrII	247338	247395	+	NA	NA	NA	NA	NA	NA	0.832991	NA	NA	NA	NA	0.296957	1.34993	NA	NA	-10.5686	NA	NA	NA	NA	-3.97992	-11.4676
1100	chrII	247506	247678	+	NA	NA	NA	NA	2.63949	0.430109	1.58665	1.26535	1.22081	2.59104	0.225765	3.15517	5.01767	-17.3456	-13.1606	-20.7788	-18.292	-14.7843	-19.0344	-13.2245	-23.4495	-27.8466
1101	chrII	247749	247894	+	NA	NA	NA	NA	1.19977	NA	1.11065	0.907233	0.249145	1.12758	4.55293	4.30588	4.04979	-16.1427	NA	-14.1302	-12.7691	-10.7218	-12.6862	-19.6354	-21.5106	-20.7975
1103	chrII	247972	248284	+	NA	NA	NA	NA	9.51246	7.06991	9.71823	4.24967	16.1197	11.6117	10.0466	20.4158	63.5232	-29.4411	-24.0429	-26.6662	-22.0209	-32.922	-29.7303	-33.5955	-30.9921	-28.0738
1104	chrII	248316	248413	+	NA	NA	NA	NA	NA	NA	NA	NA	NA	NA	NA	NA	2.95457	NA	NA	NA	NA	NA	NA	NA	NA	-15.4212
1105	chrII	251138	251200	+	NA	NA	NA	NA	NA	NA	NA	1.55185	0.323889	1.17556	0.489158	0.742393	NA	NA	NA	NA	-11.2307	-1.52352	-13.4046	-10.7187	-9.62785	NA
1106	chrII	251514	251536	+	2F-87	XUT	Van_Dijk_2011	NA	0.428489	0.322581	NA	0.334244	NA	NA	NA	NA	0.611289	-0.942683	-0.979869	NA	-0.985228	NA	NA	NA	NA	-6.17378
1107	chrII	251620	251822	+	2F-87	XUT	Van_Dijk_2011	NA	2.67377	2.39248	6.74326	4.36904	2.51637	9.18859	4.89158	11.2472	2.21592	-17.2398	-18.7135	-15.6243	-18.302	-19.9954	-16.2368	-21.2612	-17.1108	-18.5391
1108	chrII	252876	252895	+	NA	NA	NA	NA	NA	NA	NA	NA	NA	NA	NA	0.259837	NA	NA	NA	NA	NA	NA	NA	NA	-4.18518	NA
1109	chrII	254170	254174	+	NA	NA	NA	NA	NA	NA	NA	NA	NA	NA	NA	0.296957	NA	NA	NA	NA	NA	NA	NA	NA	-1.90887	NA
1110	chrII	254602	254656	+	2F-89	XUT	Van_Dijk_2011	NA	NA	0.618281	NA	NA	NA	NA	NA	NA	NA	NA	-11.0827	NA	NA	NA	NA	NA	NA	NA
1111	chrII	255063	255094	+	NA	NA	NA	NA	NA	NA	NA	NA	NA	NA	0.639668	NA	NA	NA	NA	NA	NA	NA	NA	-11.324	NA	NA
1112	chrII	255868	255872	+	YBR010W	mRNA	SGD	inducible	NA	NA	NA	0.310369	NA	NA	NA	0.631034	NA	NA	NA	NA	-1.52352	NA	NA	NA	-3.09713	NA
1113	chrII	256209	256467	+	YBR010W	mRNA	SGD	constitutive	59.4572	519.679	175.364	184.431	261.005	205.34	399.906	252.97	168.232	-3.34501	-1.60783	-7.52009	-8.70478	-3.31706	-7.98932	-6.3357	-10.3857	-4.95517
1114	chrII	256527	256529	+	NA	NA	NA	NA	NA	NA	NA	NA	NA	NA	NA	0.259837	NA	NA	NA	NA	NA	NA	NA	NA	-0.985228	NA
1115	chrII	258252	258313	+	2F-93	XUT	Van_Dijk_2011	NA	0.39421	NA	NA	0.453617	0.373718	0.599778	NA	0.927991	1.57916	-10.92	NA	NA	-10.8414	-1.83659	-2.85019	NA	-9.22445	-16.8369
1116	chrII	258670	258686	+	2F-93	XUT	Van_Dijk_2011	NA	0.291373	NA	0.31733	0.740111	NA	0.263902	NA	0.668153	NA	-1.48458	NA	-1.58496	-2.73664	NA	-2.7906	NA	-5.08419	NA
1117	chrII	259012	259021	+	NA	NA	NA	NA	NA	NA	NA	NA	NA	NA	NA	0.593914	NA	NA	NA	NA	NA	NA	NA	NA	-4.94913	NA
1118	chrII	259175	259193	+	NA	NA	NA	NA	NA	NA	NA	0.453617	NA	NA	NA	0.816632	NA	NA	NA	NA	-4.16159	NA	NA	NA	-5.99029	NA
1119	chrII	260461	260532	+	YBRWTy1-2	LTR_retrotransposon	SGD	NA	0.685583	0.268818	2.53864	4.17805	0.996582	1.19956	2.14477	3.89756	1.68105	-11.2555	-7.72041	-15.042	-14.1473	-12.8878	-7.93659	-12.0401	-17.7216	-14.1857
1120	chrII	263240	263301	+	YBRWTy1-2	LTR_retrotransposon	SGD	NA	2.03961	1.69355	7.85391	1.33698	2.84026	6.16571	7.93941	9.68822	3.82056	0	0	0	0	-2.88307	0	0	0	0
1121	chrII	265381	265383	+	YBRWTy1-2	LTR_retrotransposon	SGD	NA	42.7461	16.0215	72.9859	163.875	34.98	40.1131	47.1849	116.667	21.93	0	0	0	0	0	0	0	0	0
1122	chrII	269748	269788	+	YBR016W	mRNA	SGD	inducible	NA	NA	NA	NA	NA	NA	NA	0.408316	0.687701	NA	NA	NA	NA	NA	NA	NA	-9.96915	-12.221
1123	chrII	270170	270536	+	YBR016W	mRNA	SGD	constitutive	295.675	273.549	642.791	518.484	689.112	599.37	432.943	618.376	742.487	-28.268	-19.1687	-24.0069	-22.7739	-22.9364	-28.2316	-28.794	-24.5502	-29.1365
1124	chrII	270547	270596	+	NA	NA	NA	NA	0.462769	0.645163	0.475995	0.52524	1.99316	0.911662	1.31696	1.41055	1.14617	-0.918296	-5.43357	-0.918296	-5.60833	-5.75082	-4.88006	-6.76655	-6.42938	-6.42903
1125	chrII	274023	274081	+	NA	NA	NA	NA	0.205675	0.349463	NA	NA	NA	NA	NA	0.222718	0.331115	-2.58496	-8.15464	NA	NA	NA	NA	NA	-3.58496	-2.30189
1126	chrII	275830	275851	+	NA	NA	NA	NA	NA	NA	NA	0.453617	NA	NA	NA	0.519675	NA	NA	NA	NA	-0.899744	NA	NA	NA	-8.71975	NA
1127	chrII	276723	276871	+	SUT013	SUT	Xu_2009	NA	13.2489	14.3011	24.6327	58.1346	0.946753	29.677	15.8412	38.4559	33.2134	-17.0797	-17.3768	-17.1485	-16.2338	-14.1478	-13.321	-16.1979	-15.4866	-19.2334
1128	chrII	276902	276925	+	SUT013	SUT	Xu_2009	NA	NA	NA	0.555327	1.71897	NA	0.599778	NA	1.29919	0.815053	NA	NA	-3.29246	-3.50967	NA	-3.17094	NA	-6.17485	-4.07766
1129	chrII	277068	277082	+	SUT013	SUT	Xu_2009	NA	NA	NA	NA	NA	NA	NA	NA	0.445436	NA	NA	NA	NA	NA	NA	NA	NA	-3.08882	NA
1130	chrII	277164	277174	+	SUT013	SUT	Xu_2009	NA	NA	NA	NA	0.429742	NA	NA	NA	0.593914	NA	NA	NA	NA	-1.70481	NA	NA	NA	-2.67943	NA
1131	chrII	277254	277259	+	SUT013	SUT	Xu_2009	NA	NA	NA	NA	NA	NA	NA	NA	0.222718	NA	NA	NA	NA	NA	NA	NA	NA	-2.32193	NA
1132	chrII	278785	278896	+	YBR020W	mRNA	SGD	inducible	NA	NA	NA	NA	2.64094	NA	NA	NA	NA	NA	NA	NA	NA	-14.6608	NA	NA	NA	NA
1133	chrII	278926	279020	+	YBR020W	mRNA	SGD	inducible	NA	NA	NA	0.26262	825.917	NA	0.376275	NA	NA	NA	NA	NA	-1.98806	-7.84864	NA	-6.13753	NA	NA
1134	chrII	279042	279100	+	NA	NA	NA	NA	NA	NA	NA	NA	6.25355	NA	NA	NA	NA	NA	NA	NA	NA	-7.66687	NA	NA	NA	NA
1135	chrII	279133	279277	+	NA	NA	NA	NA	NA	NA	NA	NA	26.6586	NA	NA	NA	NA	NA	NA	NA	NA	-18.7265	NA	NA	NA	NA
1136	chrII	279316	279590	+	NA	NA	NA	NA	NA	NA	NA	NA	86.1545	NA	NA	NA	NA	NA	NA	NA	NA	-29.5381	NA	NA	NA	NA
1137	chrII	279617	279747	+	NA	NA	NA	NA	NA	NA	NA	NA	81.8941	NA	NA	NA	NA	NA	NA	NA	NA	-20.4061	NA	NA	NA	NA
1138	chrII	279771	279967	+	NA	NA	NA	NA	NA	NA	NA	0.549115	34.3821	NA	NA	NA	NA	NA	NA	NA	-2.49613	-24.4147	NA	NA	NA	NA
1139	chrII	280003	280147	+	NA	NA	NA	NA	NA	NA	NA	NA	18.8603	NA	NA	NA	NA	NA	NA	NA	NA	-13.1166	NA	NA	NA	NA
1140	chrII	280180	280265	+	NA	NA	NA	NA	NA	NA	NA	NA	32.7626	NA	NA	NA	NA	NA	NA	NA	NA	-3.69742	NA	NA	NA	NA
1141	chrII	280518	280539	+	NA	NA	NA	NA	NA	NA	NA	NA	0.423547	NA	NA	NA	NA	NA	NA	NA	NA	-4.29313	NA	NA	NA	NA
1142	chrII	281306	281439	+	YBR021W	mRNA	SGD	inducible	6.73585	3.92474	5.35494	4.05868	NA	11.5157	5.53125	8.16632	5.9346	-15.805	-19.3237	-16.4817	-14.6148	NA	-20.9214	-16.6098	-19.8474	-19.1119
1143	chrII	281900	281918	+	NA	NA	NA	NA	NA	NA	NA	NA	NA	NA	0.30102	NA	NA	NA	NA	NA	NA	NA	NA	-3.97992	NA	NA
1144	chrII	282401	282410	+	NA	NA	NA	NA	NA	NA	NA	NA	NA	NA	NA	0.259837	NA	NA	NA	NA	NA	NA	NA	NA	-3.1231	NA
1145	chrII	282975	282982	+	NA	NA	NA	NA	NA	NA	NA	0.501366	NA	NA	NA	0.631034	NA	NA	NA	NA	-2.42309	NA	NA	NA	-2.62956	NA
1146	chrII	283161	283187	+	NA	NA	NA	NA	NA	0.2957	0.31733	NA	0.373718	NA	0.827806	0.742393	0.764112	NA	-3.69459	-2.21613	NA	-3.67318	NA	-9.16334	-10.8284	-10.7226
1147	chrII	283629	283779	+	YBR022W	mRNA	SGD	constitutive	47.5966	36.8818	30.7413	20.5799	20.3303	22.2877	30.4783	35.5606	24.8846	-18.5704	-19.9635	-21.1873	-19.9298	-18.3897	-20.2524	-19.3743	-20.1835	-19.8366
1148	chrII	283821	283960	+	NA	NA	NA	NA	3.89068	0.483872	3.1733	1.76672	1.0215	1.6314	3.64987	5.56794	2.31781	-19.8366	-19.194	-22.6436	-18.8493	-15.5188	-17.7394	-20.5562	-24.2957	-20.3535
1149	chrII	284060	284078	+	NA	NA	NA	NA	NA	0.537636	0.674326	0.596864	NA	0.719733	0.564413	1.67038	0.331115	NA	-5.99952	-6.12183	-2.49746	NA	-3.44833	-6.38051	-7.09702	-3.44465
1150	chrII	287301	287317	+	NA	NA	NA	NA	NA	NA	NA	NA	NA	NA	NA	0.371196	NA	NA	NA	NA	NA	NA	NA	NA	-6.2838	NA
1151	chrII	287877	287915	+	NA	NA	NA	NA	NA	NA	NA	NA	NA	NA	NA	0.742393	NA	NA	NA	NA	NA	NA	NA	NA	-9.99049	NA
1152	chrII	288247	288347	+	2F-101	XUT	Van_Dijk_2011	NA	2.41668	1.82796	0.872657	1.33698	2.09282	0.43184	NA	0.593914	2.39422	-21.0089	-17.7804	-12.4137	-14.4268	-18.1958	-1.57082	NA	-11.2941	-11.736
1153	chrII	289113	289121	+	YBR024W	mRNA	SGD	inducible	NA	NA	NA	0.453617	NA	NA	NA	NA	NA	NA	NA	NA	-2.94582	NA	NA	NA	NA	NA
1154	chrII	289291	289495	+	YBR024W	mRNA	SGD	constitutive	23.1041	23.9786	26.6557	37.0056	35.1046	20.5604	35.3699	28.3594	37.0594	-19.0098	-13.5428	-18.6277	-19.2061	-16.9289	-17.0416	-19.3883	-22.7907	-19.7207
1155	chrII	289512	289637	+	NA	NA	NA	NA	0.274233	NA	0.991656	0.978857	NA	0.599778	0.602041	2.15294	1.40087	-3.72887	NA	-7.92621	-7.40365	NA	-5.83265	-3.00209	-22.3	-7.78529
1156	chrII	289793	289869	+	NA	NA	NA	NA	0.80556	0.349463	1.46765	1.33698	1.24573	0.815698	1.58036	1.33631	1.83387	-8.26922	-0.995727	-10.5123	-0.838373	-9.03265	-8.198	-5.00594	-9.27087	-6.42929
1157	chrII	289925	289931	+	NA	NA	NA	NA	NA	NA	NA	NA	NA	NA	NA	0.259837	NA	NA	NA	NA	NA	NA	NA	NA	-2.54678	NA
1158	chrII	290016	290028	+	NA	NA	NA	NA	NA	NA	0.237997	NA	NA	NA	NA	NA	NA	NA	NA	-3.58496	NA	NA	NA	NA	NA	NA
1159	chrII	290231	290246	+	NA	NA	NA	NA	NA	NA	NA	NA	NA	NA	0.263393	NA	0.229234	NA	NA	NA	NA	NA	NA	-3.75111	NA	-0.991076
1160	chrII	290648	290652	+	NA	NA	NA	NA	NA	NA	NA	0.310369	NA	NA	NA	NA	NA	NA	NA	NA	-1.92247	NA	NA	NA	NA	NA
1161	chrII	292339	292347	+	2F-106	XUT	Van_Dijk_2011	NA	NA	NA	NA	NA	NA	NA	NA	NA	0.203763	NA	NA	NA	NA	NA	NA	NA	NA	-3
1162	chrII	292463	292512	+	2F-106	XUT	Van_Dijk_2011	NA	0.274233	0.994626	NA	NA	0.373718	NA	NA	NA	NA	-8.54274	-15.5281	NA	NA	-2.79835	NA	NA	NA	NA
1163	chrII	292565	292642	+	2F-106	XUT	Van_Dijk_2011	NA	NA	0.860217	NA	NA	NA	1.05561	NA	NA	NA	NA	-13.2164	NA	NA	NA	-11.8511	NA	NA	NA
1164	chrII	293918	293969	+	NA	NA	NA	NA	NA	NA	NA	NA	NA	NA	NA	0.519675	NA	NA	NA	NA	NA	NA	NA	NA	-11.2611	NA
1165	chrII	294212	294228	+	NA	NA	NA	NA	NA	NA	NA	NA	0.398633	NA	NA	0.222718	0.203763	NA	NA	NA	NA	-2	NA	NA	-4	-2
1166	chrII	295759	295814	+	NA	NA	NA	NA	NA	NA	0.237997	0.716237	NA	0.551795	NA	2.19006	0.229234	NA	NA	-1	-3.6159	NA	-6.24796	NA	-10.1863	-0.991076
1167	chrII	296277	296296	+	CUT010	CUT	Xu_2009	NA	NA	NA	NA	NA	NA	NA	0.564413	0.371196	0.407526	NA	NA	NA	NA	NA	NA	-1.94262	-2.25448	-6.37189
1168	chrII	297497	297509	+	YBR030W	mRNA	SGD	inducible	NA	NA	NA	NA	NA	NA	NA	0.222718	NA	NA	NA	NA	NA	NA	NA	NA	-3.58496	NA
1169	chrII	297977	298082	+	YBR030W	mRNA	SGD	constitutive	1.52542	1.12904	1.58665	2.93657	2.21739	1.55942	2.14477	4.1574	2.77627	-20.0593	-15.6382	-14.0896	-15.5651	-19.9598	-9.90145	-20.7097	-19.2847	-20.7824
1170	chrII	298199	298323	+	YBR030W	mRNA	SGD	constitutive	14.86	8.36024	16.5805	12.5341	6.55253	15.4983	10.4981	12.6578	13.9832	-12.7709	-10.0167	-10.9521	-12.0241	-14.426	-11.373	-15.1926	-16.5894	-10.7518
1171	chrII	298632	298635	+	NA	NA	NA	NA	NA	NA	0.237997	NA	NA	NA	NA	NA	NA	NA	NA	-1.58496	NA	NA	NA	NA	NA	NA
1172	chrII	298746	298833	+	NA	NA	NA	NA	0.257094	NA	0.555327	NA	NA	0.287893	0.225765	NA	0.432997	-8.92967	NA	-12.5911	NA	NA	-8.79805	-8.9453	NA	-14.047
1173	chrII	298905	298920	+	NA	NA	NA	NA	0.274233	NA	0.356996	NA	NA	0.383858	0.225765	NA	NA	-3.72887	NA	-3.87203	NA	NA	-3.50072	-3.90689	NA	NA
1174	chrII	299468	299484	+	NA	NA	NA	NA	NA	NA	NA	NA	NA	NA	NA	0.556794	NA	NA	NA	NA	NA	NA	NA	NA	-6.26238	NA
1175	chrII	300070	300164	+	YBR031W	mRNA	SGD	constitutive	440.898	434.383	208.763	112.187	255.474	117.556	323.484	131.849	276.787	-4.44207	-4.39542	-3.07835	-2.74392	-3.69401	-0.191329	-2.81116	-2.30714	-4.37229
1176	chrII	300202	300258	+	NA	NA	NA	NA	4.38773	2.31183	0.912323	1.52797	0.747436	NA	3.16071	0.445436	1.40087	-14.0388	-10.3004	-9.68939	-9.79195	-10.2565	NA	-12.8116	-5.75265	-10.9705
1177	chrII	300486	300560	+	NA	NA	NA	NA	12.6147	3.19893	4.12529	1.81447	3.33855	2.61503	6.05804	2.30142	5.52708	-16.9653	-14.1638	-14.6962	-12.0051	-12.9592	-11.9952	-14.5945	-14.0146	-14.9442
1178	chrII	300914	300994	+	NA	NA	NA	NA	29.0002	18.871	10.8289	5.46727	7.2003	9.40451	15.4649	4.00892	17.0142	-16.43	-18.1607	-15.9694	-13.9711	-10.4099	-16.3232	-17.5002	-14.9058	-16.3874
1179	chrII	301804	301820	+	YBR033W	mRNA	SGD	inducible	NA	NA	NA	1.57572	0.872009	NA	NA	NA	0.687701	NA	NA	NA	-5.66494	-5.10403	NA	NA	NA	-2.89929
1180	chrII	301868	301949	+	YBR033W	mRNA	SGD	inducible	NA	NA	0.991656	1.98159	8.84466	NA	0.639668	0.556794	0.356586	NA	NA	-10.552	-13.0894	-15.8491	NA	-8.37409	-4.2956	-7.95851
1181	chrII	301983	302144	+	NA	NA	NA	NA	NA	NA	0.436329	1.74284	3.23889	NA	NA	0.853751	NA	NA	NA	-11.2066	-20.0704	-25.6984	NA	NA	-18.2165	NA
1182	chrII	302270	302358	+	NA	NA	NA	NA	0.479908	0.376345	2.14198	12.4148	10.9126	0.64776	1.39222	8.76023	2.11404	-0.996317	-0.940286	-9.36136	-7.47223	-6.59818	-0.918296	-0.639457	-8.1437	-4.51673
1183	chrII	302510	302571	+	NA	NA	NA	NA	NA	NA	NA	2.00546	0.423547	NA	0.225765	0.519675	NA	NA	NA	NA	-15.422	-8.58357	NA	-9.16324	-13.552	NA
1184	chrII	302729	302744	+	NA	NA	NA	NA	NA	NA	NA	0.405868	NA	NA	NA	0.371196	NA	NA	NA	NA	-3.41455	NA	NA	NA	-3.7934	NA
1185	chrII	303818	303925	+	NA	NA	NA	NA	4.98762	2.52689	9.6389	26.3814	0.348804	8.06101	7.07398	23.4596	4.07526	-12.5978	-8.12058	-9.20367	-11.8016	-7.69746	-10.222	-8.36057	-10.2103	-12.1617
1186	chrII	303961	304064	+	NA	NA	NA	NA	3.05084	0.215054	3.1733	4.29742	NA	0.359867	2.25765	9.8367	2.36875	-18.5906	-8.80537	-20.2802	-16.7213	NA	-11.9334	-19.3616	-17.4	-17.7984
1187	chrII	304108	304300	+	NA	NA	NA	NA	2.10817	NA	0.515661	2.00546	NA	0.64776	0.263393	2.11582	NA	-15.4441	NA	-9.61835	-20.4816	NA	-9.07981	-8.36049	-27.6249	NA
1188	chrII	304379	304527	+	NA	NA	NA	NA	2.12531	0.645163	2.37997	2.96045	NA	3.11884	0.827806	7.31257	3.20927	-17.4246	-13.5414	-14.7235	-16.9128	NA	-16.3963	-16.8392	-20.5893	-17.3998
1189	chrII	306235	306288	+	CUT011	CUT	Xu_2009	NA	NA	1.85484	NA	1.09823	2.01808	0.767715	0.865434	3.30365	4.20261	NA	0	NA	-1.33316	0	-2.20694	-2.113	-8.26308	-1.05332
1190	chrII	306502	306515	+	CUT011	CUT	Xu_2009	NA	NA	NA	NA	NA	NA	NA	NA	0.259837	NA	NA	NA	NA	NA	NA	NA	NA	-3.64578	NA
1193	chrII	307458	308363	+	TLC1	telomerase_RNA_gene	SGD	NA	474.938	585.915	855.482	2261.76	1203.32	1456.04	771.478	1264.96	546.136	-17.4667	-16.2003	-14.4074	-14.4523	-13.8703	-17.3789	-16.2941	-14.2474	-19.5994
1194	chrII	309809	309826	+	NA	NA	NA	NA	NA	NA	NA	NA	NA	NA	NA	0.556794	NA	NA	NA	NA	NA	NA	NA	NA	-5.95365	NA
1195	chrII	310190	310219	+	NA	NA	NA	NA	NA	NA	0.237997	NA	NA	NA	0.225765	NA	NA	NA	NA	-4.24793	NA	NA	NA	-3.45943	NA	NA
1196	chrII	311754	311956	+	YBR038W	mRNA	SGD	constitutive	8.31269	54.2743	96.7856	84.8741	32.6381	94.0691	76.6849	61.6186	106.492	-21.955	-12.1237	-17.116	-14.7668	-19.4234	-14.5246	-13.5424	-13.8539	-14.6413
1197	chrII	311979	312088	+	NA	NA	NA	NA	0.325652	0.698927	6.1086	4.17805	0.573035	9.54846	3.16071	3.00669	10.4174	-0.949452	-13.3172	-14.9819	-8.39174	-11.7732	-14.4055	-10.2676	-13.8789	-13.713
1198	chrII	312238	312242	+	NA	NA	NA	NA	NA	2.01613	5.03761	4.1303	2.86517	6.42962	3.80038	4.41724	6.39307	NA	0	0	0	0	0	0	0	0
1199	chrII	312333	312421	+	NA	NA	NA	NA	NA	NA	0.912323	NA	NA	0.983635	0.827806	1.18783	0.203763	NA	NA	-4.25186	NA	NA	-13.9485	-11.4551	-11.4271	-10.4539
1200	chrII	312485	312489	+	NA	NA	NA	NA	NA	NA	0.237997	NA	NA	NA	NA	0.371196	NA	NA	NA	-2	NA	NA	NA	NA	-1.9419	NA
1201	chrII	313079	313096	+	NA	NA	NA	NA	NA	NA	0.277664	NA	NA	NA	NA	NA	NA	NA	NA	-4.02708	NA	NA	NA	NA	NA	NA
1202	chrII	313920	313927	+	NA	NA	NA	NA	NA	NA	1.94365	NA	1.17098	1.72736	1.54273	1.07647	2.34328	NA	NA	0	NA	0	0	0	0	0
1203	chrII	314008	314013	+	NA	NA	NA	NA	NA	NA	NA	NA	NA	NA	NA	NA	1.3754	NA	NA	NA	NA	NA	NA	NA	NA	0
1204	chrII	314077	314079	+	NA	NA	NA	NA	NA	0.268818	NA	NA	NA	NA	NA	NA	NA	NA	-1	NA	NA	NA	NA	NA	NA	NA
1205	chrII	315475	316187	+	YBR039W	mRNA	SGD	constitutive	138.385	151.103	194.246	329.373	253.032	142.771	219.068	148.775	205.622	-32.7796	-19.9297	-32.5951	-26.5154	-31.031	-30.8171	-31.0607	-32.3629	-32.5433
1206	chrII	316277	316353	+	NA	NA	NA	NA	0.548466	NA	NA	0.477491	NA	NA	0.376275	NA	0.407526	-8.4035	NA	NA	-9.32457	NA	NA	-10.0271	NA	-12.0888
1207	chrII	316874	317004	+	YBR040W	mRNA	SGD	inducible	413.201	NA	0.31733	NA	NA	0.743724	NA	NA	NA	-13.9408	NA	-2.58496	NA	NA	-9.31496	NA	NA	NA
1208	chrII	317028	317088	+	NA	NA	NA	NA	4.81622	NA	NA	NA	NA	NA	NA	NA	NA	-6.41388	NA	NA	NA	NA	NA	NA	NA	NA
1209	chrII	317154	317228	+	NA	NA	NA	NA	26.2064	NA	NA	NA	NA	NA	NA	0.334077	NA	-9.64981	NA	NA	NA	NA	NA	NA	-2.7823	NA
1210	chrII	317310	317338	+	NA	NA	NA	NA	4.38773	NA	NA	NA	NA	NA	NA	NA	NA	-5.77173	NA	NA	NA	NA	NA	NA	NA	NA
1211	chrII	317392	317470	+	NA	NA	NA	NA	2.74233	NA	NA	NA	NA	NA	NA	NA	NA	-12.7842	NA	NA	NA	NA	NA	NA	NA	NA
1212	chrII	317538	317640	+	NA	NA	NA	NA	12.529	NA	NA	NA	NA	NA	NA	NA	NA	-14.6523	NA	NA	NA	NA	NA	NA	NA	NA
1213	chrII	317679	317716	+	NA	NA	NA	NA	1.97105	NA	NA	NA	NA	NA	NA	NA	NA	-11.8438	NA	NA	NA	NA	NA	NA	NA	NA
1214	chrII	317762	317782	+	NA	NA	NA	NA	1.49114	NA	NA	NA	NA	NA	NA	NA	NA	-9.00312	NA	NA	NA	NA	NA	NA	NA	NA
1215	chrII	318156	318305	+	YBR041W	mRNA	SGD	constitutive	36.3016	41.2098	30.3843	21.9885	22.6473	26.5821	31.9082	21.2695	42.7393	-16.8936	-14.5327	-16.2623	-15.8645	-17.2613	-17.9426	-18.3761	-17.2144	-19.4747
1216	chrII	318415	318423	+	NA	NA	NA	NA	0.839839	0.537636	0.594994	0.501366	0.348804	0.719733	0.677296	0.742393	1.27352	-3.03762	-0.881291	-0.970951	-2.80276	-0.940286	-0.996792	-0.964079	-4.53866	-2.80821
1217	chrII	318748	318750	+	NA	NA	NA	NA	0.582746	NA	NA	NA	NA	0.575787	NA	NA	NA	-0.733538	NA	NA	NA	NA	-0.954434	NA	NA	NA
1218	chrII	319339	319358	+	NA	NA	NA	NA	NA	NA	NA	0.26262	NA	NA	NA	0.445436	NA	NA	NA	NA	-4.22257	NA	NA	NA	-4.24793	NA
1219	chrII	319616	319653	+	NA	NA	NA	NA	NA	NA	NA	NA	NA	NA	NA	NA	0.585819	NA	NA	NA	NA	NA	NA	NA	NA	-9.96655
1220	chrII	319743	319855	+	NA	NA	NA	NA	0.685583	0.537636	0.356996	NA	NA	0.407849	0.489158	0.705273	1.52822	-5.64076	-3.60224	-8.08848	NA	NA	-3.82859	-10.3737	-8.73633	-16.6205
1221	chrII	321165	321276	+	NA	NA	NA	NA	0.908397	NA	NA	1.1221	0.697607	NA	0.376275	3.19229	NA	-15.4929	NA	NA	-13.963	-13.4812	NA	-11.4394	-15.9903	NA
1222	chrII	321348	321355	+	2F-123	XUT	Van_Dijk_2011	NA	NA	NA	NA	NA	NA	NA	NA	0.222718	NA	NA	NA	NA	NA	NA	NA	NA	-2.80735	NA
1223	chrII	321806	321815	+	NA	NA	NA	NA	NA	NA	NA	NA	NA	NA	NA	0.259837	NA	NA	NA	NA	NA	NA	NA	NA	-3.1231	NA
1224	chrII	323152	323174	+	NA	NA	NA	NA	NA	NA	NA	0.477491	NA	NA	NA	0.890871	NA	NA	NA	NA	-3.15939	NA	NA	NA	-9.85154	NA
1225	chrII	324329	324343	+	NA	NA	NA	NA	NA	NA	NA	0.787861	NA	0.43184	NA	0.259837	NA	NA	NA	NA	-3.36937	NA	-3.24541	NA	-3.75111	NA
1226	chrII	324404	324413	+	2F-125	XUT	Van_Dijk_2011	NA	0.582746	0.322581	0.436329	0.644613	0.747436	1.00763	1.24171	0.890871	0.967875	-1.91937	-1.95974	-4.9851	-1.99802	-4.81168	-1.97046	-1.76993	-4.52796	-4.30863
1227	chrII	324469	324621	+	CUT014	CUT	Xu_2009	NA	NA	NA	NA	NA	NA	NA	2.97258	NA	NA	NA	NA	NA	NA	NA	NA	-23.6791	NA	NA
1228	chrII	325655	325748	+	NA	NA	NA	NA	1.49114	1.74732	3.56996	22.6808	4.83342	6.35764	3.16071	7.79512	1.47728	-8.7766	-15.472	-16.4956	-17.5626	-15.9831	-15.8242	-14.2052	-16.1664	-17.0753
1229	chrII	325843	326120	+	2F-127	XUT	Van_Dijk_2011	NA	1.26833	1.4785	0.515661	9.35883	NA	1.39148	0.526786	2.63549	0.254704	-20.7691	-14.7613	-15.9496	-28.7866	NA	-22.7181	-18.3669	-23.598	-13.3416
1230	chrII	326257	326387	+	CUT015	CUT	Xu_2009	NA	3.13654	5.51077	1.90398	11.3643	10.5638	4.70226	4.3648	4.56571	4.58467	-23.9541	-23.031	-18.8238	-27.5202	-24.0901	-23.7346	-25.1259	-24.2094	-25.5099
1231	chrII	326938	327142	+	NA	NA	NA	NA	1.38831	NA	0.594994	8.73809	0.473376	NA	NA	15.0706	1.40087	-15.6644	NA	-14.1979	-21.3437	-14.292	NA	NA	-20.8044	-15.5011
1232	chrII	329291	329296	+	NA	NA	NA	NA	NA	NA	0.356996	NA	NA	NA	NA	1.22495	NA	NA	NA	-2.30121	NA	NA	NA	NA	-1.73104	NA
1233	chrII	329843	329943	+	NA	NA	NA	NA	1.79966	1.34409	1.03132	3.00819	6.47778	NA	1.76849	7.05273	2.47063	-16.5866	-11.4624	-12.497	-16.376	-14.0022	NA	-11.466	-16.6761	-14.7215
1234	chrII	331714	332094	+	YBR047W	mRNA	SGD	constitutive	20.8931	29.2474	53.7477	48.7041	207.812	29.1012	97.8316	58.649	116.756	-24.2629	-20.9677	-20.223	-12.7059	-27.3587	-22.323	-23.1915	-24.7099	-22.3032
1235	chrII	332504	332506	+	YBR048W	mRNA	SGD	inducible	NA	NA	NA	NA	NA	NA	NA	0.408316	NA	NA	NA	NA	NA	NA	NA	NA	-0.99403	NA
1236	chrII	332641	333076	+	YBR048W	mRNA	SGD	constitutive	1850.27	2125.84	1183.8	255.911	461.99	1374.93	1409.08	689.052	964.538	-12.0232	-11.3068	-12.4731	-15.5165	-12.876	-9.52586	-9.37707	-12.5922	-15.8007
1238	chrII	333149	333174	+	NA	NA	NA	NA	NA	NA	NA	NA	NA	NA	NA	0.593914	NA	NA	NA	NA	NA	NA	NA	NA	-8.9918	NA
1239	chrII	333229	333248	+	NA	NA	NA	NA	NA	NA	NA	NA	NA	NA	NA	0.259837	NA	NA	NA	NA	NA	NA	NA	NA	-4.18518	NA
1240	chrII	333414	333505	+	NA	NA	NA	NA	35.119	16.0753	17.2548	3.34244	7.22522	29.5091	32.9241	9.94806	17.7019	-10.0736	-12.1326	-9.64409	-9.31431	-8.43739	-10.2401	-8.58341	-12.5327	-10.1722
1241	chrII	333525	333607	+	NA	NA	NA	NA	15.4428	13.9248	5.15661	2.33971	2.29214	9.90833	13.3202	3.15517	8.37976	-7.9455	-5.63189	-8.50339	-4.81087	-3.33306	-7.51107	-10.1287	-4.36947	-8.25443
1242	chrII	334176	334197	+	NA	NA	NA	NA	0.39421	NA	NA	NA	0.298975	NA	NA	0.371196	NA	-1.97539	NA	NA	NA	-2.27518	NA	NA	-6.4212	NA
1243	chrII	334253	334261	+	NA	NA	NA	NA	NA	NA	NA	NA	NA	NA	NA	0.556794	NA	NA	NA	NA	NA	NA	NA	NA	-2.50992	NA
1244	chrII	336509	336577	+	NA	NA	NA	NA	NA	0.967744	0.594994	0.931108	NA	0.479822	0.978316	0.816632	NA	NA	-15.021	-11.1663	-10.2418	NA	-11.4435	-14.8153	-11.4146	NA
1245	chrII	337186	337325	+	YBR051W	mRNA	SGD	constitutive	0.754141	1.66667	1.03132	7.043	0.896924	2.27916	0.752551	4.49148	3.03098	-3.91518	-5.51844	-2.54065	-12.2061	-4.32085	-16.2753	-15.5384	-19.1037	-8.83015
1246	chrII	338112	338122	+	NA	NA	NA	NA	NA	NA	NA	0.310369	NA	NA	NA	NA	NA	NA	NA	NA	-3.19316	NA	NA	NA	NA	NA
1247	chrII	338267	338271	+	NA	NA	NA	NA	NA	NA	NA	NA	NA	0.287893	NA	NA	NA	NA	NA	NA	NA	NA	-1.95974	NA	NA	NA
1248	chrII	339594	339906	+	CUT016	CUT	Xu_2009	NA	NA	1.12904	2.9353	3.10369	8.44603	1.77534	3.16071	1.67038	4.78843	NA	-16.8726	-26.6328	-14.7641	-21.4386	-18.8274	-20.8378	-23.9788	-28.8607
1249	chrII	340174	340179	+	NA	NA	NA	NA	NA	NA	NA	0.334244	NA	NA	NA	NA	NA	NA	NA	NA	-2.32193	NA	NA	NA	NA	NA
1250	chrII	340973	341006	+	NA	NA	NA	NA	1.19977	2.04302	1.78498	1.57572	1.91842	2.87893	2.48342	4.38012	3.94791	-6.92897	-5.29132	-4.76657	-2.1193	-5.52152	-7.29588	-7.24006	-6.4219	-6.39132
1251	chrII	341138	341159	+	CUT017	CUT	Xu_2009	NA	NA	NA	NA	NA	NA	NA	NA	0.222718	NA	NA	NA	NA	NA	NA	NA	NA	-4.39232	NA
1252	chrII	341275	341280	+	CUT017	CUT	Xu_2009	NA	NA	NA	NA	NA	NA	0.311884	NA	NA	NA	NA	NA	NA	NA	NA	-2.23192	NA	NA	NA
1253	chrII	341440	341484	+	CUT017	CUT	Xu_2009	NA	1.76538	0.806454	1.86431	3.8438	2.09282	2.30315	1.42985	1.93022	2.34328	-8.35204	-6.03489	-9.74902	-8.70765	-6.30665	-12.6089	-11.6441	-7.92524	-6.27486
1254	chrII	341989	342001	+	CUT017	CUT	Xu_2009	NA	NA	NA	NA	NA	NA	NA	NA	NA	0.203763	NA	NA	NA	NA	NA	NA	NA	NA	-3.58496
1256	chrII	342502	342845	+	YBR054W	mRNA	SGD	constitutive	67.3928	714.76	64.3386	115.815	688.563	341.681	513.315	431.404	107.078	-14.512	-8.62087	-10.7067	-11.0941	-8.90311	-5.40163	-10.4303	-5.90231	-14.4235
1257	chrII	342866	343005	+	YBR054W	mRNA	SGD	inducible	4.45629	1.23656	0.277664	NA	3.16415	1.03162	3.04783	3.00669	0.967875	-15.6011	-13.5239	-9.06772	NA	-16.9123	-10.0338	-23.6405	-19.1898	-11.8219
1258	chrII	343059	343245	+	YBR054W	mRNA	SGD	inducible	0.959816	2.09678	NA	NA	3.71227	1.77534	4.3648	2.63549	2.98004	-18.0587	-19.1568	NA	NA	-21.1854	-18.5296	-24.8402	-22.4476	-22.1639
1259	chrII	343277	343284	+	NA	NA	NA	NA	NA	NA	NA	NA	NA	NA	0.30102	NA	NA	NA	NA	NA	NA	NA	NA	-2.67943	NA	NA
1260	chrII	343457	343478	+	NA	NA	NA	NA	NA	0.591399	NA	NA	0.697607	0.479822	0.376275	0.259837	0.382056	NA	-8.26502	NA	NA	-3.1201	-0.970951	-0.881291	-1.56155	-0.970951
1261	chrII	343539	343646	+	NA	NA	NA	NA	NA	3.8441	NA	NA	7.79825	2.39911	3.76275	2.59837	3.97338	NA	-3.61384	NA	NA	-0.560409	-1.2474	-2.61609	-0.341154	-2.17213
1262	chrII	343676	343804	+	NA	NA	NA	NA	0.428489	4.8656	0.753658	0.52524	7.57402	3.14284	4.96684	4.67707	4.63561	-9.44452	-16.6436	-14.4077	-9.78042	-19.48	-14.0477	-18.9282	-19.353	-20.7093
1263	chrII	343876	343943	+	NA	NA	NA	NA	NA	1.74732	NA	NA	1.39521	0.43184	1.16645	1.59614	1.83387	NA	-8.16648	NA	NA	-11.2216	-8.14171	-5.59486	-12.4554	-12.0176
1264	chrII	344013	344116	+	NA	NA	NA	NA	NA	3.92474	0.396662	NA	2.21739	0.623769	3.19834	2.04158	2.87815	NA	-12.0407	-8.21742	NA	-12.3222	-9.08085	-20.6211	-15.08	-17.1312
1265	chrII	344259	344320	+	NA	NA	NA	NA	4.16492	4.97313	1.54698	3.05594	2.64094	1.8953	2.52105	2.11582	2.85268	-13.9737	-16.8022	-9.43123	-7.75473	-9.63759	-8.56255	-13.0196	-8.78486	-15.6938
1266	chrII	347753	347984	+	YBR056W	mRNA	SGD	constitutive	115.418	73.3335	112.335	163.732	122.754	111.99	95.4235	182.851	124.703	-14.0128	-17.1181	-9.93403	-10.5141	-16.0209	-11.4832	-12.3269	-10.9883	-17.7279
1267	chrII	348035	348278	+	NA	NA	NA	NA	0.548466	0.806454	2.9353	3.74831	1.94333	3.2388	2.37054	8.35192	5.55255	-13.3823	-14.6552	-22.8902	-16.5702	-19.1512	-24.0934	-24.9512	-26.0156	-25.1955
1268	chrII	348420	348486	+	NA	NA	NA	NA	2.62236	0.45699	1.90398	2.17259	1.94333	1.77534	1.31696	1.96734	3.03098	-11.0509	-1.581	-12.9961	-10.4623	-9.69005	-12.0383	-9.93618	-17.2156	-12.7987
1269	chrII	348548	348822	+	NA	NA	NA	NA	12.032	1.31721	6.1086	6.87587	3.06449	5.73387	3.42411	3.56348	13.2446	-32.2102	-26.3343	-31.2394	-29.901	-26.9636	-30.0939	-27.1502	-28.3729	-33.5656
1270	chrII	348887	348933	+	NA	NA	NA	NA	0.325652	NA	NA	NA	NA	NA	NA	NA	0.738641	-7.91238	NA	NA	NA	NA	NA	NA	NA	-10.874
1271	chrII	348987	349168	+	NA	NA	NA	NA	8.24414	1.85484	2.34031	4.24967	2.81534	4.34239	3.6875	2.70973	7.94676	-13.829	-9.38572	-15.1197	-15.8581	-12.6349	-13.3837	-13.6793	-11.8586	-13.3181
1272	chrII	349585	349604	+	NA	NA	NA	NA	0.291373	NA	NA	NA	1.76893	NA	NA	0.445436	0.254704	-3.74667	NA	NA	NA	-6.76597	NA	NA	-3.67318	-3.8838
1273	chrII	350014	350206	+	2F-141	XUT	Van_Dijk_2011	NA	1.86821	2.3656	0.95199	2.14871	2.3918	1.48745	1.65561	1.74462	0.280174	-20.6557	-20.374	-20.3874	-22.0974	-23.7647	-16.6217	-23.2191	-19.9211	-11.2293
1274	chrII	351039	351518	+	YBR056W-A	mRNA	SGD	constitutive	201.287	97.1239	26.4574	80.6483	82.8907	107.912	26.5274	126.986	83.2882	-26.5749	-14.01	-21.9985	-19.8155	-19.2742	-24.8862	-18.4771	-14.1045	-30.7544
1275	chrII	351603	351641	+	NA	NA	NA	NA	NA	1.42473	NA	NA	0.398633	NA	0.940689	0.742393	NA	NA	-14.2626	NA	NA	-7.42403	NA	-11.588	-11.2507	NA
1276	chrII	353719	353729	+	NA	NA	NA	NA	NA	NA	NA	NA	NA	NA	NA	0.482555	NA	NA	NA	NA	NA	NA	NA	NA	-2.58894	NA
1277	chrII	353805	353809	+	NA	NA	NA	NA	NA	NA	NA	NA	NA	NA	NA	0.408316	NA	NA	NA	NA	NA	NA	NA	NA	-1.6907	NA
1278	chrII	356232	356276	+	2F-143	XUT	Van_Dijk_2011	NA	NA	0.268818	NA	NA	NA	NA	NA	0.519675	NA	NA	-3.7934	NA	NA	NA	NA	NA	-10.8382	NA
1279	chrII	356374	356390	+	2F-143	XUT	Van_Dijk_2011	NA	NA	NA	NA	NA	NA	NA	NA	0.445436	NA	NA	NA	NA	NA	NA	NA	NA	-3.24511	NA
1280	chrII	356524	356532	+	2F-143	XUT	Van_Dijk_2011	NA	NA	NA	NA	NA	NA	NA	NA	0.296957	NA	NA	NA	NA	NA	NA	NA	NA	-2.8633	NA
1281	chrII	356857	356928	+	NA	NA	NA	NA	NA	NA	NA	0.52524	NA	NA	NA	1.59614	0.432997	NA	NA	NA	-7.65302	NA	NA	NA	-15.4999	-7.84013
1282	chrII	360219	360229	+	NA	NA	NA	NA	NA	NA	NA	1.09823	NA	NA	NA	0.816632	NA	NA	NA	NA	-5.04188	NA	NA	NA	-5.07758	NA
1283	chrII	360608	360621	+	CUT018	CUT	Xu_2009	NA	NA	NA	NA	NA	NA	NA	NA	0.259837	0.382056	NA	NA	NA	NA	NA	NA	NA	-1.97046	-3.05051
1284	chrII	361945	361952	+	NA	NA	NA	NA	NA	NA	NA	NA	NA	NA	NA	0.222718	NA	NA	NA	NA	NA	NA	NA	NA	-2.80735	NA
1285	chrII	362423	362431	+	NA	NA	NA	NA	NA	NA	NA	NA	NA	NA	NA	NA	0.305645	NA	NA	NA	NA	NA	NA	NA	NA	-2.93961
1286	chrII	362802	362921	+	2F-145	XUT	Van_Dijk_2011	NA	45.6427	22.5269	40.6976	70.7164	41.7817	73.5088	30.3278	95.7315	32.8313	-16.2578	-17.2335	-15.2913	-14.997	-14.4661	-15.6857	-16.3121	-15.6688	-21.4305
1287	chrII	362943	363011	+	2F-145	XUT	Van_Dijk_2011	NA	2.3824	NA	0.753658	1.5996	0.323889	1.99126	NA	2.2643	0.63676	-16.4239	NA	-11.8359	-17.9299	-3.44465	-16.2848	NA	-14.8167	-11.1737
1288	chrII	363075	363079	+	2F-145	XUT	Van_Dijk_2011	NA	NA	NA	NA	NA	NA	NA	NA	0.408316	NA	NA	NA	NA	NA	NA	NA	NA	-3.14525	NA
1289	chrII	363228	363424	+	2F-145	XUT	Van_Dijk_2011	NA	NA	NA	0.277664	2.24421	NA	1.0796	NA	2.63549	NA	NA	NA	-8.52396	-16.2486	NA	-9.67229	NA	-26.2117	NA
1290	chrII	364337	364355	+	2F-145	XUT	Van_Dijk_2011	NA	NA	NA	NA	NA	NA	NA	NA	0.259837	NA	NA	NA	NA	NA	NA	NA	NA	-4.10833	NA
1291	chrII	365884	365923	+	CUT019	CUT	Xu_2009	NA	0.497048	0.698927	0.872657	0.978857	0.573035	0.959644	NA	0.816632	0.916934	-6.87936	-7.16813	-8.21144	-1.04509	-7.40453	-7.59977	NA	-9.03842	-7.52065
1292	chrII	366740	366805	+	2F-146	XUT	Van_Dijk_2011	NA	NA	0.2957	NA	2.05321	NA	NA	0.564413	2.15294	NA	NA	-8.77059	NA	-13.784	NA	NA	-13.0824	-10.6879	NA
1293	chrII	369458	369465	+	NA	NA	NA	NA	NA	NA	NA	NA	NA	NA	NA	0.371196	NA	NA	NA	NA	NA	NA	NA	NA	-2.4741	NA
1294	chrII	369950	369957	+	NA	NA	NA	NA	NA	NA	NA	0.238746	NA	NA	NA	NA	NA	NA	NA	NA	-2.80735	NA	NA	NA	NA	NA
1295	chrII	370019	370039	+	NA	NA	NA	NA	NA	NA	NA	NA	NA	NA	NA	NA	0.585819	NA	NA	NA	NA	NA	NA	NA	NA	-8.44139
1296	chrII	370092	370102	+	CUT020	CUT	Xu_2009	NA	NA	0.241936	NA	0.429742	1.29556	NA	NA	0.668153	NA	NA	-1.98215	NA	-1.83659	-3.67276	NA	NA	-1.92816	NA
1297	chrII	370513	370589	+	CUT020	CUT	Xu_2009	NA	15.1857	32.3388	16.0252	19.5055	17.4153	17.9933	28.5593	12.5836	20.249	-10.937	-12.627	-11.053	-11.0986	-12.8028	-10.5339	-10.8166	-12.6377	-11.3357
1298	chrII	370906	370921	+	2F-149	XUT	Van_Dijk_2011	NA	NA	NA	NA	NA	NA	0.311884	NA	0.445436	NA	NA	NA	NA	NA	NA	-3.75545	NA	-3.58768	NA
1299	chrII	371324	371486	+	2F-150	XUT	Van_Dijk_2011	NA	3.97638	3.41399	1.46765	3.70056	1.96825	1.6074	1.58036	1.78174	5.5016	-24.125	-17.6776	-17.9437	-15.2369	-12.6742	-15.3812	-14.108	-16.651	-20.2486
1300	chrII	371640	371700	+	2F-150	XUT	Van_Dijk_2011	NA	NA	NA	NA	NA	NA	NA	NA	NA	0.942405	NA	NA	NA	NA	NA	NA	NA	NA	-11.2872
1301	chrII	371755	371786	+	2F-150	XUT	Van_Dijk_2011	NA	NA	NA	NA	NA	NA	NA	NA	NA	1.55369	NA	NA	NA	NA	NA	NA	NA	NA	-8.91727
1302	chrII	371875	371978	+	2F-150	XUT	Van_Dijk_2011	NA	1.6454	1.37097	1.70565	1.05048	0.847095	4.99015	NA	4.1574	2.29234	-15.7458	-8.9835	-13.5158	-6.35003	-11.8718	-18.9696	NA	-8.77775	-23.0777
1303	chrII	372059	372068	+	2F-150	XUT	Van_Dijk_2011	NA	0.291373	NA	0.237997	NA	NA	0.335876	NA	0.222718	NA	-2.31613	NA	-1	NA	NA	-1.56155	NA	-3	NA
1304	chrII	372767	372824	+	2F-150	XUT	Van_Dijk_2011	NA	NA	NA	NA	NA	NA	NA	NA	1.03935	NA	NA	NA	NA	NA	NA	NA	NA	-13.0669	NA
1305	chrII	372967	372982	+	2F-150	XUT	Van_Dijk_2011	NA	NA	NA	NA	NA	NA	NA	NA	0.742393	NA	NA	NA	NA	NA	NA	NA	NA	-4.61517	NA
1306	chrII	373155	373165	+	2F-150	XUT	Van_Dijk_2011	NA	NA	NA	NA	NA	NA	0.383858	NA	NA	NA	NA	NA	NA	NA	NA	-3.28439	NA	NA	NA
1307	chrII	373437	373526	+	2F-150	XUT	Van_Dijk_2011	NA	1.33689	0.564518	1.78498	8.09348	1.49487	7.22132	0.677296	4.67707	0.509408	-11.8639	-15.7047	-16.8624	-16.7292	-12.6339	-18.9218	-13.2797	-16.0617	-10.6595
1308	chrII	373785	373792	+	NA	NA	NA	NA	NA	NA	NA	NA	NA	NA	NA	0.334077	0.229234	NA	NA	NA	NA	NA	NA	NA	-2.57798	-2.7823
1309	chrII	373989	374052	+	NA	NA	NA	NA	NA	NA	0.356996	0.52524	NA	NA	1.20408	1.15071	NA	NA	NA	-7.06803	-4.21829	NA	NA	-15.0067	-12.8027	NA
1310	chrII	375893	375964	+	NA	NA	NA	NA	NA	NA	NA	3.00819	NA	1.8953	0.790178	7.01561	NA	NA	NA	NA	-5.62548	NA	0	-0.591673	-10.9664	NA
1311	chrII	376354	376377	+	CUT021	CUT	Xu_2009	NA	NA	NA	NA	NA	NA	NA	NA	0.371196	0.331115	NA	NA	NA	NA	NA	NA	NA	-2.4741	-4.07
1312	chrII	376484	376529	+	CUT021	CUT	Xu_2009	NA	NA	1.07527	NA	NA	NA	0.407849	1.76849	0.705273	0.942405	NA	-8.20396	NA	NA	NA	-7.30436	-8.35272	-6.50097	-9.02369
1313	chrII	378772	378774	+	NA	NA	NA	NA	NA	NA	NA	NA	0.323889	NA	NA	NA	NA	NA	NA	NA	NA	-0.995727	NA	NA	NA	NA
1314	chrII	379079	379163	+	CUT022	CUT	Xu_2009	NA	NA	1.10215	NA	NA	0.498291	NA	0.714923	NA	2.24139	NA	-11.0628	NA	NA	-9.38469	NA	-12.1277	NA	-14.1622
1315	chrII	379279	379296	+	CUT022	CUT	Xu_2009	NA	NA	0.268818	NA	NA	NA	NA	0.526786	0.482555	NA	NA	-4.08746	NA	NA	NA	NA	-3.52797	-6.32977	NA
1316	chrII	380180	380482	+	YBR071W	mRNA	SGD	constitutive	51.3502	96.7207	274.014	236.788	118.817	319.37	124.886	278.806	79.111	-19.1159	-23.4186	-24.3584	-18.6559	-26.3285	-22.224	-25.4398	-21.0173	-25.1349
1317	chrII	380515	380769	+	NA	NA	NA	NA	2.53666	1.98925	15.9458	15.8527	3.7621	22.4797	5.56888	15.4418	5.55255	-13.9603	-7.12958	-21.4785	-20.3455	-19.4279	-19.9739	-20.8319	-22.1994	-21.0861
1318	chrII	381011	381117	+	NA	NA	NA	NA	0.377071	0.591399	3.0543	1.33698	0.597949	2.61503	1.27934	2.15294	0.764112	-9.17818	-12.5021	-16.929	-5.10552	-3.38979	-14.0141	-12.1252	-16.8875	-12.2085
1319	chrII	381353	381357	+	YBR072W	mRNA	SGD	inducible	NA	NA	NA	0.358118	NA	NA	NA	NA	0.483937	NA	NA	NA	-1.99358	NA	NA	NA	NA	-1.96388
1320	chrII	381464	381565	+	YBR072W	mRNA	SGD	inducible	1.30261	0.591399	1.34865	3.22307	NA	2.51907	0.903061	1.55902	0.63676	-12.6607	-3.09291	-6.17929	-5.84428	NA	-9.53525	-6.55055	-8.29191	-11.7247
1322	chrII	381688	382486	+	YBR072W	mRNA	SGD	constitutive	256.528	298.495	1395.54	3915.17	1484.56	1442.06	822.2	2441.25	2388.79	-15.0124	-5.45897	-12.4208	-12.9717	-9.6965	-12.9262	-12.7968	-12.8165	-12.9497
1324	chrII	383072	383191	+	YBR073W	mRNA	SGD	constitutive	31.9653	64.2475	108.923	84.7069	30.6449	94.8129	52.7914	78.7679	53.9972	-13.4428	-10.9539	-10.2981	-15.3134	-17.7738	-9.40381	-10.3063	-10.4075	-13.9988
1325	chrII	383260	383267	+	NA	NA	NA	NA	NA	0.349463	1.82465	1.3131	NA	2.44709	0.790178	0.631034	1.24805	NA	-0.961237	-0.828056	-2.10305	NA	-4.64573	-0.863121	-0.997503	-3.51743
1326	chrII	383369	383370	+	NA	NA	NA	NA	NA	NA	2.85597	1.69509	NA	1.99126	NA	NA	1.47728	NA	NA	0	0	NA	0	NA	NA	0
1327	chrII	383485	383578	+	NA	NA	NA	NA	2.03961	1.55914	7.57625	1.55185	1.66927	5.03813	3.49936	3.71196	4.32997	-9.0265	-8.80067	-10.6694	-12.6338	-9.67803	-9.45601	-12.4453	-8.65102	-8.42314
1328	chrII	383648	383699	+	NA	NA	NA	NA	NA	0.322581	1.03132	0.429742	NA	0.43184	0.413903	NA	0.356586	NA	-8.63451	-12.2749	-2.49083	NA	-8.68161	-2.44003	NA	-8.43711
1329	chrII	383758	383781	+	NA	NA	NA	NA	NA	NA	0.594994	NA	NA	0.623769	0.30102	NA	NA	NA	NA	-1.14423	NA	NA	-1.33194	-4.19218	NA	NA
1330	chrII	384355	384358	+	NA	NA	NA	NA	NA	NA	NA	NA	NA	NA	NA	NA	0.229234	NA	NA	NA	NA	NA	NA	NA	NA	-1.57082
1331	chrII	384532	384553	+	NA	NA	NA	NA	NA	NA	NA	NA	NA	NA	0.30102	0.222718	NA	NA	NA	NA	NA	NA	NA	-0.954434	-4.39232	NA
1332	chrII	384611	384686	+	NA	NA	NA	NA	NA	NA	1.22965	0.286495	NA	NA	NA	0.927991	0.356586	NA	NA	-11.3862	-3.91948	NA	NA	NA	-13.3939	-3.76114
1333	chrII	384775	384786	+	NA	NA	NA	NA	NA	0.241936	1.34865	0.286495	0.323889	1.39148	NA	0.853751	0.611289	NA	-0.991076	-2.12449	-1	-0.961237	-2.20436	NA	-4.58364	-2.1018
1334	chrII	385342	385373	+	NA	NA	NA	NA	NA	NA	1.03132	NA	NA	NA	0.30102	0.927991	0.458467	NA	NA	-8.61705	NA	NA	NA	-7.05848	-10.8864	-6.50861
1335	chrII	385487	385535	+	NA	NA	NA	NA	NA	NA	0.277664	NA	NA	NA	NA	0.222718	NA	NA	NA	-1.56155	NA	NA	NA	NA	-4.39232	NA
1336	chrII	385608	385618	+	NA	NA	NA	NA	NA	NA	0.594994	NA	NA	NA	NA	NA	0.229234	NA	NA	-4.5542	NA	NA	NA	NA	NA	-3.29228
1337	chrII	385680	385693	+	NA	NA	NA	NA	NA	NA	0.793325	NA	NA	0.671751	0.338648	NA	NA	NA	NA	-4.73248	NA	NA	-4.98289	-5.68203	NA	NA
1338	chrII	386227	386340	+	YBR074W	mRNA	SGD	constitutive	80.5217	104.221	64.3783	56.1291	32.4637	89.1749	63.139	84.3729	59.2696	-9.93961	-8.44697	-17.8882	-18.1431	-16.7748	-15.4651	-16.5065	-16.643	-11.9431
1339	chrII	386461	386474	+	NA	NA	NA	NA	7.07864	2.6613	3.72863	4.05868	1.7191	6.4776	4.1014	3.22941	5.22143	-1.31965	-1.46114	-1.15094	-1.43943	-1.37659	-1.27103	-1.19223	-1.41628	-1.37856
1340	chrII	386552	386610	+	NA	NA	NA	NA	0.874118	NA	0.515661	0.26262	NA	0.815698	0.413903	0.408316	0.407526	-5.47816	NA	-6.19036	-8.19306	NA	-8.3015	-4.14503	-11.1465	-6.44745
1341	chrII	386733	386803	+	NA	NA	NA	NA	2.75947	1.50538	1.58665	1.43247	0.622864	2.66301	2.06952	1.59614	2.13951	-13.3991	-10.5451	-11.7284	-13.2256	-9.35318	-13.7338	-17.1654	-9.61035	-14.6571
1342	chrII	386882	386909	+	NA	NA	NA	NA	0.462769	NA	0.237997	0.52524	NA	0.527804	NA	1.11359	0.66223	-4.03959	NA	-4.08746	-5.22414	NA	-4.14606	NA	-10.3191	-5.56551
1343	chrII	386964	386980	+	NA	NA	NA	NA	1.11407	NA	1.18999	NA	NA	1.94328	NA	1.41055	1.29899	0	NA	0	NA	NA	0	NA	0	0
1344	chrII	387584	387586	+	NA	NA	NA	NA	0.308512	NA	0.396662	NA	NA	NA	NA	NA	0.432997	-0.918296	NA	-1	NA	NA	NA	NA	NA	-0.977418
1345	chrII	387741	387759	+	NA	NA	NA	NA	NA	NA	NA	0.381993	NA	NA	0.263393	NA	NA	NA	NA	NA	-6.58612	NA	NA	-0.985228	NA	NA
1346	chrII	387811	387833	+	NA	NA	NA	NA	NA	NA	NA	NA	NA	NA	NA	0.445436	NA	NA	NA	NA	NA	NA	NA	NA	-6.68915	NA
1347	chrII	388098	388101	+	NA	NA	NA	NA	0.308512	NA	NA	NA	NA	NA	NA	NA	0.305645	-1.45546	NA	NA	NA	NA	NA	NA	NA	-1.55306
1348	chrII	388302	388329	+	NA	NA	NA	NA	0.377071	NA	NA	NA	NA	NA	0.526786	NA	0.356586	-0.845351	NA	NA	NA	NA	NA	-5.35097	NA	-6.70071
1349	chrII	388489	388526	+	NA	NA	NA	NA	1.40545	0.887099	1.70565	NA	0.348804	0.839689	1.12883	1.48479	1.3754	-11.4041	-3.23027	-11.268	NA	-8.10808	-9.55289	-14.3149	-7.83821	-8.52145
1350	chrII	388769	388785	+	NA	NA	NA	NA	0.428489	0.483872	0.555327	NA	NA	NA	0.376275	NA	NA	-0.904381	-0.764205	-3.84918	NA	NA	NA	-3.44311	NA	NA
1351	chrII	390644	390681	+	NA	NA	NA	NA	NA	NA	NA	0.52524	NA	NA	NA	1.78174	0.356586	NA	NA	NA	-5.53961	NA	NA	NA	-6.16699	-2.76589
1352	chrII	390770	390891	+	NA	NA	NA	NA	NA	NA	0.515661	0.907233	1.12115	0.791707	0.413903	5.04827	NA	NA	NA	-15.7354	-16.9766	-12.7519	-10.1667	-13.3313	-18.5755	NA
1353	chrII	390951	391018	+	NA	NA	NA	NA	NA	0.322581	1.42798	1.26535	1.5447	2.08723	1.05357	2.30142	1.04429	NA	-2.13222	-8.74437	-11.3615	-13.3688	-9.22981	-10.2945	-9.74669	-13.4645
1354	chrII	391151	391171	+	NA	NA	NA	NA	NA	NA	NA	NA	NA	NA	NA	0.222718	NA	NA	NA	NA	NA	NA	NA	NA	-4.32193	NA
1355	chrII	391876	391922	+	2F-166	XUT	Van_Dijk_2011	NA	0.41135	1.1828	NA	1.2176	0.872009	NA	0.338648	NA	0.585819	-0.918296	-3.15088	NA	-8.47298	-2.90367	NA	-1.98215	NA	-2.7069
1356	chrII	391973	392011	+	2F-166	XUT	Van_Dijk_2011	NA	0.80556	NA	NA	0.883359	NA	NA	0.677296	0.631034	NA	-6.66825	NA	NA	-5.71542	NA	NA	-5.61782	-2.13112	NA
1357	chrII	392137	392152	+	YBR078W	mRNA	SGD	inducible	NA	0.376345	NA	0.668488	0.348804	NA	0.489158	0.519675	1.14617	NA	-0.985228	NA	-5.99829	-0.940286	NA	-3.04483	-5.83148	-7.32948
1360	chrII	392867	393211	+	YBR078W	mRNA	SGD	constitutive	740.738	484.007	632.042	315.264	161.82	557.289	393.622	593.766	174.65	-8.40675	-8.26184	-7.04494	-8.19274	-23.1984	-11.0003	-13.3408	-7.38592	-20.6451
1361	chrII	393246	393259	+	NA	NA	NA	NA	NA	NA	NA	0.668488	0.946753	0.407849	NA	NA	NA	NA	NA	NA	-5.50722	-5.02971	-2.25921	NA	NA	NA
1362	chrII	393460	393843	+	NA	NA	NA	NA	83.5726	23.0915	52.5181	19.6965	9.4177	48.7739	34.2787	45.3231	19.5358	-38.221	-36.1957	-33.0432	-32.34	-30.4857	-34.0038	-36.8991	-38.9124	-37.1823
1363	chrII	393894	393946	+	NA	NA	NA	NA	7.54141	3.19893	5.35494	1.76672	0.872009	3.47871	3.19834	2.85821	1.22258	-12.7487	-13.5073	-18.0636	-8.18991	-10.8574	-12.4361	-10.019	-11.8428	-14.8731
1364	chrII	393995	394413	+	NA	NA	NA	NA	28.0746	10.2688	16.0648	2.76945	1.69419	15.2823	13.8469	8.72311	5.29784	-40.6959	-38.5254	-40.4154	-33.0965	-28.8925	-38.2432	-41.137	-38.418	-34.3212
1365	chrII	394473	394528	+	NA	NA	NA	NA	2.74233	1.23656	0.63466	NA	NA	0.383858	0.865434	0.222718	0.356586	-14.8062	-15.4693	-9.24511	NA	NA	-8.03284	-12.5216	-3.80735	-1.49032
1366	chrII	394593	394600	+	NA	NA	NA	NA	NA	0.215054	NA	NA	NA	NA	NA	NA	NA	NA	-2.80735	NA	NA	NA	NA	NA	NA	NA
1367	chrII	394656	394768	+	NA	NA	NA	NA	1.7311	1.82796	2.26098	NA	0.573035	1.46346	1.39222	0.779512	0.611289	-13.8163	-12.7317	-17.7792	NA	-11.7268	-12.9538	-17.3645	-11.7039	-16.8168
1368	chrII	406100	406244	+	NA	NA	NA	NA	3.58217	1.98925	4.44262	8.54709	2.34197	5.97379	5.30548	10.542	5.98554	-16.963	-17.5153	-18.0528	-18.9511	-13.3349	-17.9137	-22.3027	-18.4071	-19.9727
1369	chrII	406595	406616	+	NA	NA	NA	NA	NA	NA	0.356996	NA	NA	NA	NA	NA	NA	NA	NA	-4.03345	NA	NA	NA	NA	NA	NA
1370	chrII	406669	406743	+	NA	NA	NA	NA	NA	NA	0.713992	NA	NA	1.10359	0.413903	1.03935	NA	NA	NA	-10.0877	NA	NA	-7.608	-10.7289	-15.4299	NA
1371	chrII	407338	407363	+	NA	NA	NA	NA	0.39421	0.510754	0.396662	0.954982	0.298975	NA	NA	1.07647	0.280174	-2.49613	-2.53828	-4.19638	-7.28129	-2.58496	NA	NA	-7.25924	-2.4445
1372	chrII	407515	407701	+	2F-169	XUT	Van_Dijk_2011	NA	7.01009	8.27959	4.79961	17.0226	11.8842	17.2976	15.4273	11.47	9.3731	-23.6182	-21.9924	-21.3203	-26.1224	-23.8464	-22.913	-20.7937	-25.0693	-22.2638
1373	chrII	408016	408156	+	2F-169	XUT	Van_Dijk_2011	NA	NA	NA	NA	2.41133	NA	0.551795	0.489158	1.63326	NA	NA	NA	NA	-16.4134	NA	-12.7154	-15.1681	-16.9403	NA
1374	chrII	408289	408306	+	YBR083W	mRNA	SGD	inducible	NA	NA	NA	NA	NA	NA	0.225765	NA	NA	NA	NA	NA	NA	NA	NA	-4.08746	NA	NA
1375	chrII	408380	408394	+	YBR083W	mRNA	SGD	inducible	0.634164	NA	NA	NA	NA	0.383858	0.225765	0.631034	NA	-3.5609	NA	NA	NA	NA	-3.41154	-3.80735	-2.55966	NA
1376	chrII	408893	408970	+	YBR083W	mRNA	SGD	constitutive	0.257094	0.591399	0.356996	3.27081	1.3703	0.263902	0.714923	0.742393	2.82721	-3.79514	-11.5163	-8.39066	-15.6976	-15.6705	-2.30807	-12.0784	-12.0819	-13.0377
1377	chrII	409075	409254	+	YBR083W	mRNA	SGD	constitutive	69.3296	6.98927	57.3574	38.8917	21.277	60.1697	34.8431	91.0916	20.1726	-17.7189	-20.4011	-16.5844	-17.6727	-18.896	-17.8728	-20.7645	-17.366	-20.2306
1378	chrII	409275	409833	+	NA	NA	NA	NA	9.01542	NA	7.17959	11.2688	1.99316	7.36527	4.81633	14.6623	5.04314	-37.995	NA	-39.9508	-35.7099	-25.5966	-38.1322	-36.4708	-46.2411	-34.9529
1379	chrII	409858	409919	+	NA	NA	NA	NA	2.48524	0.215054	4.48228	1.07436	0.697607	3.04687	1.0912	3.22941	1.40087	-4.45916	-1.58496	-8.08492	-8.22169	-1.36801	-5.18865	-0.917368	-4.51764	-2.27083
1380	chrII	409981	409988	+	NA	NA	NA	NA	NA	NA	0.396662	NA	NA	NA	NA	NA	NA	NA	NA	-2.4741	NA	NA	NA	NA	NA	NA
1381	chrII	410109	410217	+	NA	NA	NA	NA	7.93562	NA	8.8059	1.62347	2.34197	5.15809	2.93495	9.09431	2.54704	-4.09362	NA	-3.05648	0	-3.95557	-0.307268	0	-6.26542	-1.09382
1382	chrII	410324	410346	+	NA	NA	NA	NA	1.02837	NA	1.42798	NA	NA	0.383858	0.639668	2.19006	0.458467	-8.40892	NA	-5.44942	NA	NA	-1.79208	-6.57013	-10.24	-6.30526
1383	chrII	410448	410453	+	NA	NA	NA	NA	NA	NA	0.475995	NA	NA	NA	NA	NA	0.203763	NA	NA	-1.88373	NA	NA	NA	NA	NA	-2.32193
1384	chrII	410930	411122	+	YBR084W	mRNA	SGD	constitutive	97.9013	160.162	105.552	50.4708	40.6107	136.006	125.488	50.1486	60.8233	-12.204	-12.9188	-6.58534	-6.20611	-9.15425	-5.44303	-6.1349	-5.86058	-13.825
1385	chrII	411173	411196	+	NA	NA	NA	NA	0.257094	NA	NA	NA	NA	0.599778	0.526786	NA	NA	-1.57988	NA	NA	NA	NA	-3.41134	-6.39541	NA	NA
1386	chrII	411278	411281	+	NA	NA	NA	NA	1.25119	1.42473	1.46765	0.763986	NA	1.87131	1.84375	NA	0.764112	-0.898938	-0.736768	-0.494183	-0.696212	NA	-0.77935	-0.793591	NA	-0.970951
1387	chrII	411507	411561	+	NA	NA	NA	NA	NA	0.672045	0.753658	NA	NA	0.767715	1.20408	NA	NA	NA	-10.2157	-11.3443	NA	NA	-7.58309	-10.5354	NA	NA
1388	chrII	411787	411902	+	NA	NA	NA	NA	0.565606	NA	0.793325	NA	NA	0.335876	0.263393	NA	NA	-11.1012	NA	-12.87	NA	NA	-12.7876	-12.9436	NA	NA
1389	chrII	411961	411966	+	NA	NA	NA	NA	0.257094	NA	NA	NA	NA	0.311884	NA	NA	NA	-2.31448	NA	NA	NA	NA	-2.31201	NA	NA	NA
1390	chrII	412146	412154	+	NA	NA	NA	NA	0.80556	0.994626	NA	NA	NA	1.00763	1.35459	0.482555	0.534878	-2.55231	-1.48255	NA	NA	NA	-1.95007	-3.30405	-1.23524	-1.11338
1391	chrII	412312	412324	+	NA	NA	NA	NA	NA	NA	NA	NA	NA	0.335876	0.451531	NA	NA	NA	NA	NA	NA	NA	-3.53201	-3.29206	NA	NA
1392	chrII	412393	412471	+	NA	NA	NA	NA	2.67377	2.41936	2.65764	NA	0.373718	4.8462	3.04783	1.63326	1.8084	-18.8936	-15.8238	-14.035	NA	-8.78215	-18.4566	-17.5769	-16.4891	-15.4061
1393	chrII	412622	412629	+	NA	NA	NA	NA	0.342792	0.322581	NA	NA	NA	NA	NA	NA	NA	-2.7258	-2.80735	NA	NA	NA	NA	NA	NA	NA
1394	chrII	412794	412802	+	NA	NA	NA	NA	0.514187	NA	NA	NA	NA	0.64776	NA	NA	0.331115	-4.74044	NA	NA	NA	NA	-0.975119	NA	NA	-2.88371
1395	chrII	413073	413206	+	NA	NA	NA	NA	NA	NA	0.95199	NA	NA	0.407849	0.639668	NA	NA	NA	NA	-18.5565	NA	NA	-13.2755	-16.2341	NA	NA
1396	chrII	413283	413397	+	NA	NA	NA	NA	NA	NA	1.74531	NA	NA	1.29552	1.16645	NA	0.63676	NA	NA	-12.2887	NA	NA	-9.96393	-10.1988	NA	-1.26011
1397	chrII	413470	413560	+	NA	NA	NA	NA	NA	0.887099	0.555327	NA	NA	0.599778	0.978316	NA	0.229234	NA	-15.1485	-10.1828	NA	NA	-14.7924	-19.2346	NA	-0.991076
1398	chrII	413684	413686	+	NA	NA	NA	NA	NA	0.672045	NA	NA	NA	NA	NA	NA	NA	NA	-0.721928	NA	NA	NA	NA	NA	NA	NA
1399	chrII	415826	415951	+	YBR085W	mRNA	SGD	constitutive	12.4948	27.5538	5.23594	6.47001	4.31022	28.3335	8.84247	13.0661	2.72533	-19.3942	-18.731	-15.2124	-17.7524	-16.9303	-18.0976	-13.4148	-18.7543	-18.2661
1400	chrII	417393	417394	+	NA	NA	NA	NA	NA	NA	NA	1.09823	NA	NA	NA	NA	NA	NA	NA	NA	0	NA	NA	NA	NA	NA
1401	chrII	417460	417503	+	NA	NA	NA	NA	NA	0.698927	0.237997	1.64734	0.54812	0.623769	0.225765	0.890871	NA	NA	-2.52108	-3.70044	-9.2394	-6.04045	-5.87483	-3.80735	-13.263	NA
1402	chrII	417709	417720	+	NA	NA	NA	NA	NA	NA	NA	NA	NA	NA	NA	0.631034	NA	NA	NA	NA	NA	NA	NA	NA	-4.78474	NA
1403	chrII	418327	418398	+	NA	NA	NA	NA	5.12473	5.32259	4.75995	3.62893	5.25697	7.74913	6.99872	3.71196	7.20812	-11.7903	-11.2246	-12.5963	-12.8215	-12.26	-7.99686	-11.7332	-12.1524	-12.5998
1404	chrII	418446	418506	+	NA	NA	NA	NA	NA	NA	NA	NA	NA	0.455831	NA	NA	0.229234	NA	NA	NA	NA	NA	-4.10346	NA	NA	-3.29228
1405	chrII	418819	418835	+	NA	NA	NA	NA	NA	NA	NA	NA	NA	0.287893	NA	NA	NA	NA	NA	NA	NA	NA	-4	NA	NA	NA
1406	chrII	419322	419380	+	NA	NA	NA	NA	NA	NA	0.356996	1.62347	0.398633	0.839689	NA	1.11359	0.611289	NA	NA	-3.87203	-15.9196	-4.27309	-7.36063	NA	-13.7725	-10.1237
1407	chrII	419438	419467	+	NA	NA	NA	NA	NA	NA	0.63466	0.501366	NA	0.287893	0.526786	NA	0.764112	NA	NA	-6.99424	-2.37558	NA	-3.51279	-9.6442	NA	-8.58993
1408	chrII	419526	419621	+	NA	NA	NA	NA	NA	NA	0.872657	0.429742	NA	1.03162	0.564413	0.705273	1.34993	NA	NA	-10.3516	-3.68403	NA	-6.37914	-9.42047	-9.57651	-15.574
1409	chrII	419804	419826	+	NA	NA	NA	NA	NA	NA	NA	NA	NA	NA	0.30102	0.222718	0.305645	NA	NA	NA	NA	NA	NA	-4	-2.80735	-2.80735
1410	chrII	420116	420277	+	NA	NA	NA	NA	2.09103	2.17742	0.832991	1.81447	2.19248	1.72736	2.14477	2.2643	5.78178	-20.1992	-19.0673	-15	-13.5072	-14.9309	-14.0919	-16.7244	-18.0367	-24.703
1411	chrII	420996	421006	+	NA	NA	NA	NA	NA	NA	NA	0.286495	NA	NA	NA	NA	NA	NA	NA	NA	-3.25505	NA	NA	NA	NA	NA
1412	chrII	422354	422366	+	NA	NA	NA	NA	NA	NA	NA	NA	NA	NA	NA	0.816632	NA	NA	NA	NA	NA	NA	NA	NA	-8.03954	NA
1413	chrII	423262	423385	+	YBR087W	mRNA	SGD	inducible	NA	0.510754	3.01463	23.1106	1.96825	6.86146	8.99298	4.93691	4.78843	NA	-13.3031	-15.6354	-20.775	-10.8919	-20.7274	-19.9456	-20.0345	-20.2112
1414	chrII	423726	423803	+	YBR087W	mRNA	SGD	constitutive	20.4647	32.07	19.8728	12.9161	22.1241	16.29	19.9426	16.8523	29.1127	-5.9074	-10.6356	-1.84272	-5.96813	-6.42054	-4.69351	-6.67924	-5.68482	-7.8356
1415	chrII	424174	424192	+	NA	NA	NA	NA	0.599885	NA	NA	NA	NA	NA	0.564413	NA	NA	-3.96878	NA	NA	NA	NA	NA	-6.07377	NA	NA
1416	chrII	425457	425473	+	NA	NA	NA	NA	0.856979	NA	NA	NA	NA	NA	NA	NA	NA	-9.14164	NA	NA	NA	NA	NA	NA	NA	NA
1417	chrII	425786	425793	+	NA	NA	NA	NA	0.325652	NA	NA	NA	NA	NA	NA	NA	NA	-2.80174	NA	NA	NA	NA	NA	NA	NA	NA
1418	chrII	427107	427222	+	2F-177	XUT	Van_Dijk_2011	NA	2.87945	3.60216	2.65764	8.45159	6.87642	7.43724	1.5051	9.05719	5.11955	-10.4328	-10.833	-11.4917	-13.1465	-13.0182	-13.5996	-7.15227	-10.6367	-14.9987
1419	chrII	427715	427756	+	2F-177	XUT	Van_Dijk_2011	NA	NA	0.698927	0.515661	2.26808	1.79385	0.455831	NA	1.18783	0.331115	NA	-9.41094	-3.19238	-10.933	-10.8974	-6.94526	NA	-11.6527	-6.21197
1420	chrII	429552	429599	+	2F-177	XUT	Van_Dijk_2011	NA	3.25652	0.645163	1.58665	5.46727	1.09624	5.18208	1.65561	7.12697	2.4961	-13.7315	-5.71365	-11.1679	-12.2252	-9.06638	-14.8791	-10.221	-13.6235	-10.1352
1421	chrII	430688	430706	+	CUT025	CUT	Xu_2009	NA	NA	NA	NA	NA	NA	0.455831	NA	0.445436	NA	NA	NA	NA	NA	NA	-6.53976	NA	-3.82922	NA
1422	chrII	431919	432117	+	YBR094W	mRNA	SGD	constitutive	18.3393	21.371	16.8582	18.1924	16.2941	15.4023	13.5083	15.9614	22.2102	-16.3412	-11.461	-12.0193	-18.4297	-15.8629	-15.0708	-15.0469	-21.0942	-13.1353
1423	chrII	432179	432181	+	NA	NA	NA	NA	0.582746	NA	NA	NA	NA	NA	0.225765	NA	0.534878	-0.989993	NA	NA	NA	NA	NA	-1	NA	-0.958712
1424	chrII	432376	432390	+	NA	NA	NA	NA	NA	NA	NA	0.716237	NA	NA	NA	NA	NA	NA	NA	NA	-5.34428	NA	NA	NA	NA	NA
1425	chrII	432589	432603	+	NA	NA	NA	NA	NA	NA	NA	NA	NA	NA	NA	0.631034	NA	NA	NA	NA	NA	NA	NA	NA	-6.99259	NA
1426	chrII	432970	432991	+	NA	NA	NA	NA	0.39421	NA	NA	NA	NA	0.407849	NA	NA	0.560349	-4.33826	NA	NA	NA	NA	-6.87685	NA	NA	-4.3661
1427	chrII	433118	433177	+	NA	NA	NA	NA	0.359931	0.322581	0.63466	NA	NA	0.503813	NA	0.519675	1.14617	-8.16061	-0.918296	-5.92852	NA	NA	-3.73035	NA	-7.64612	-9.20358
1428	chrII	433419	433507	+	NA	NA	NA	NA	0.462769	NA	1.50732	NA	NA	NA	NA	0.556794	0.764112	-5.77608	NA	-19.0249	NA	NA	NA	NA	-5.7332	-13.8577
1429	chrII	433748	433751	+	NA	NA	NA	NA	NA	NA	0.237997	NA	NA	NA	NA	NA	NA	NA	NA	-1.58496	NA	NA	NA	NA	NA	NA
1430	chrII	434145	434166	+	NA	NA	NA	NA	0.41135	NA	NA	NA	NA	NA	NA	NA	NA	-6.7393	NA	NA	NA	NA	NA	NA	NA	NA
1431	chrII	435903	436320	+	YBR096W	mRNA	SGD	constitutive	121.605	80.9679	56.4451	18.5505	29.748	55.5874	32.8112	63.9942	95.514	-16.1993	-15.5875	-14.9056	-16.4179	-15.3748	-14.8091	-14.9184	-17.9789	-17.0546
1432	chrII	436440	436454	+	YBR097W	mRNA	SGD	inducible	0.514187	NA	NA	NA	NA	NA	NA	NA	NA	-3.60967	NA	NA	NA	NA	NA	NA	NA	NA
1433	chrII	436845	436957	+	YBR097W	mRNA	SGD	constitutive	32.3081	29.3818	33.5973	45.4572	32.0401	48.51	27.0166	50.0744	33.1115	-15.3462	-13.7394	-15.0899	-14.015	-14.6876	-15.2244	-15.2414	-13.4558	-17.8511
1434	chrII	437080	437204	+	NA	NA	NA	NA	0.359931	NA	0.991656	0.501366	NA	1.03162	0.413903	0.853751	1.04429	-9.754	NA	-13.7563	-8.92213	NA	-13.0765	-1.49884	-11.1993	-13.4683
1435	chrII	437737	437741	+	NA	NA	NA	NA	NA	NA	0.436329	NA	NA	0.383858	NA	0.371196	NA	NA	NA	-3.07897	NA	NA	-1.51274	NA	-1	NA
1436	chrII	438052	438056	+	NA	NA	NA	NA	NA	NA	0.63466	NA	0.722522	0.743724	NA	0.96511	0.534878	NA	NA	-2.95443	NA	-3.05506	-0.770629	NA	-2.5473	-0.863121
1437	chrII	439428	439437	+	NA	NA	NA	NA	NA	NA	NA	NA	NA	NA	NA	0.296957	NA	NA	NA	NA	NA	NA	NA	NA	-3.02548	NA
1438	chrII	439572	439574	+	NA	NA	NA	NA	NA	0.322581	0.31733	NA	0.373718	0.455831	NA	NA	0.305645	NA	-0.979869	-0.954434	NA	-0.918296	-0.899744	NA	NA	-0.918296
1439	chrII	440155	440157	+	NA	NA	NA	NA	NA	NA	0.31733	NA	NA	NA	NA	NA	NA	NA	NA	-0.954434	NA	NA	NA	NA	NA	NA
1440	chrII	441453	441539	+	YBR098W	mRNA	SGD	constitutive	7.67853	5.86023	12.8122	14.2531	8.12214	11.3238	7.90178	18.4113	5.57802	-18.0607	-17.9237	-14.0987	-15.0321	-17.7977	-13.7941	-17.9164	-13.1848	-19.0069
1441	chrII	441650	441666	+	NA	NA	NA	NA	NA	NA	NA	NA	NA	NA	NA	0.296957	NA	NA	NA	NA	NA	NA	NA	NA	-4	NA
1442	chrII	441841	441858	+	NA	NA	NA	NA	NA	NA	NA	NA	NA	NA	NA	0.371196	NA	NA	NA	NA	NA	NA	NA	NA	-4.08746	NA
1443	chrII	441953	442046	+	NA	NA	NA	NA	NA	NA	0.63466	0.310369	NA	1.17556	NA	2.15294	0.63676	NA	NA	-9.13157	-9.66324	NA	-11.9634	NA	-13.5995	-3.43611
1444	chrII	442229	442232	+	NA	NA	NA	NA	NA	NA	0.356996	NA	NA	NA	NA	NA	NA	NA	NA	-1.45546	NA	NA	NA	NA	NA	NA
1445	chrII	444982	445038	+	NA	NA	NA	NA	0.719862	0.483872	NA	NA	NA	1.55942	0.526786	NA	0.203763	-6.47012	-2.49211	NA	NA	NA	-9.70527	-7.52933	NA	-9.20444
1446	chrII	445097	445128	+	NA	NA	NA	NA	1.78252	0.645163	1.11065	2.19646	NA	14.2507	1.46747	1.00223	0.611289	-12.2708	-5.0349	-6.65028	-10.6837	NA	-14.1206	-9.97733	-5.71576	-5.09696
1447	chrII	447505	447782	+	YBR103W	mRNA	SGD	constitutive	13.506	11.1828	14.9542	22.1556	15.6463	14.8265	17.6849	21.6036	17.2435	-29.6504	-27.6077	-30.3781	-30.516	-26.873	-20.46	-26.9814	-30.4871	-30.916
1448	chrII	447876	447879	+	NA	NA	NA	NA	NA	NA	0.713992	NA	0.298975	0.503813	0.263393	0.519675	NA	NA	NA	-2.27525	NA	-1	-0.918296	-1.56155	-2.46724	NA
1449	chrII	448064	448078	+	NA	NA	NA	NA	0.497048	0.241936	0.713992	0.954982	NA	0.935653	0.526786	0.668153	0.815053	-3.31908	-3.29228	-3.29228	-3.31593	NA	-4.85163	-2.86722	-5.63748	-4.16381
1450	chrII	448289	448291	+	NA	NA	NA	NA	NA	NA	NA	NA	NA	NA	NA	0.334077	NA	NA	NA	NA	NA	NA	NA	NA	-0.991076	NA
1451	chrII	449574	449634	+	YBR104W	mRNA	SGD	constitutive	15.9569	9.94626	10.2736	7.44886	7.44945	11.2038	62.6499	18.1144	12.3022	-12.8323	-12.5927	-10.7621	-9.75727	-8.95021	-11.8273	-9.59676	-9.62302	-12.5551
1452	chrII	449666	449751	+	YBR104W	mRNA	SGD	inducible	NA	NA	NA	NA	NA	NA	1.5051	1.59614	0.356586	NA	NA	NA	NA	NA	NA	-14.5885	-15.5994	-8.96951
1453	chrII	449937	450003	+	NA	NA	NA	NA	1.30261	0.483872	0.594994	0.716237	0.523206	0.719733	5.49362	1.00223	0.967875	-10.0116	-6.66925	-7.43484	-1.14423	-6.8905	-10.9757	-12.4735	-11.9324	-5.65216
1454	chrII	450038	450097	+	NA	NA	NA	NA	NA	NA	NA	0.310369	NA	NA	1.65561	NA	NA	NA	NA	NA	-7.97591	NA	NA	0	NA	NA
1455	chrII	450266	450303	+	NA	NA	NA	NA	1.57684	NA	0.674326	0.572989	0.348804	0.839689	4.1014	0.445436	1.19711	-0.858637	NA	-0.672295	-0.994985	-0.940286	-0.927527	-5.88381	-0.918296	-0.746737
1456	chrII	450416	450429	+	NA	NA	NA	NA	NA	NA	NA	NA	NA	NA	0.413903	NA	NA	NA	NA	NA	NA	NA	NA	-3.49936	NA	NA
1457	chrII	452145	452228	+	YBR106W	mRNA	SGD	inducible	0.531327	0.2957	1.15032	18.073	NA	3.57467	1.31696	5.27099	1.50275	-0.993234	-1.89132	-6.21683	-13.8111	NA	-4.45761	-0.99718	-6.65118	-9.88579
1458	chrII	452323	452333	+	YBR106W	mRNA	SGD	inducible	NA	NA	NA	0.716237	NA	NA	NA	0.259837	NA	NA	NA	NA	-1.24226	NA	NA	NA	-2.95568	NA
1460	chrII	452544	452731	+	YBR106W	mRNA	SGD	constitutive	200.91	166.506	180.045	49.1816	80.2498	139.58	159.014	106.533	97.9082	-21.3878	-20.7714	-19.6294	-19.328	-20.1572	-19.5755	-17.4729	-20.6818	-22.1823
1461	chrII	452778	452978	+	NA	NA	NA	NA	51.2131	20.8603	24.1964	12.8445	13.3044	33.3716	36.0848	15.9986	15.4605	-30.7478	-26.9138	-28.9068	-24.1712	-23.6059	-28.2395	-29.372	-26.7968	-29.6874
1462	chrII	453576	453648	+	SUT017	SUT	Xu_2009	NA	3.80499	1.80108	1.15032	2.93657	2.29214	0.599778	1.5051	2.0787	3.31115	-7.41187	-5.09067	-10.4382	-11.027	-10.7791	-10.7413	-13.3739	-13.6421	-11.4685
1463	chrII	454326	454388	+	YBR108W	mRNA	SGD	inducible	NA	0.537636	0.555327	NA	0.498291	NA	0.677296	1.81886	0.305645	NA	-3.24511	-3.45248	NA	-3.9711	NA	-6.85864	-7.22994	-8.71103
1464	chrII	454732	455184	+	YBR108W	mRNA	SGD	constitutive	13.9516	22.9033	71.9942	101.753	31.5667	60.7935	51.625	61.0247	62.9119	-16.4835	-17.0049	-21.6911	-15.9248	-17.7391	-21.35	-20.4654	-18.0807	-25.469
1465	chrII	455300	455571	+	NA	NA	NA	NA	NA	0.322581	5.39461	2.24421	1.29556	2.711	1.0912	5.23387	4.83937	NA	-17.7414	-22.646	-15.2885	-10.4679	-18.5625	-20.0955	-27.6665	-25.5016
1466	chrII	455684	455774	+	NA	NA	NA	NA	NA	NA	0.396662	0.883359	NA	0.407849	NA	0.853751	NA	NA	NA	-12.2409	-16.601	NA	-9.33309	NA	-17.894	NA
1467	chrII	455837	455858	+	NA	NA	NA	NA	NA	NA	NA	NA	NA	NA	NA	0.259837	0.229234	NA	NA	NA	NA	NA	NA	NA	-0.985228	-4.28336
1468	chrII	455926	456037	+	NA	NA	NA	NA	NA	NA	NA	NA	NA	0.383858	NA	1.18783	0.509408	NA	NA	NA	NA	NA	-12.4413	NA	-13.2107	-10.8313
1469	chrII	456174	456316	+	NA	NA	NA	NA	NA	NA	2.65764	1.45635	0.573035	0.743724	0.790178	2.96957	1.60463	NA	NA	-10.2312	-17.1419	-9.66118	-10.8781	-13.0529	-16.1057	-14.8962
1470	chrII	456550	456565	+	NA	NA	NA	NA	NA	NA	0.237997	NA	0.27406	NA	NA	0.222718	NA	NA	NA	-1.58496	NA	-1.5755	NA	NA	-3.90689	NA
1471	chrII	456662	456688	+	NA	NA	NA	NA	NA	NA	0.475995	NA	NA	NA	0.639668	0.408316	0.407526	NA	NA	-3.67318	NA	NA	NA	-6.50118	-6.15794	-3.9548
1472	chrII	456882	456895	+	NA	NA	NA	NA	NA	NA	0.872657	0.26262	NA	0.743724	0.263393	0.816632	0.764112	NA	NA	-5.45012	-2.7906	NA	-2.7032	-2.76589	-5.31585	-2.57798
1473	chrII	458136	458148	+	YBR109W-A	mRNA	SGD	inducible	NA	NA	NA	NA	NA	NA	NA	0.371196	NA	NA	NA	NA	NA	NA	NA	NA	-3.15939	NA
1474	chrII	458600	458727	+	YBR110W	mRNA	SGD	constitutive	14.6029	20.8334	11.4635	14.3009	12.2081	10.2682	16.1046	19.1537	11.7164	-16.6713	-19.5777	-19.8251	-22.7823	-22.4668	-17.8935	-17.5103	-19.981	-23.3574
1475	chrII	458758	459101	+	YBR110W	mRNA	SGD	constitutive	60.1085	59.2206	64.4576	81.2451	59.2717	69.4063	52.9043	65.2563	71.4699	-14.3953	-13.7279	-8.71285	-7.94511	-15.565	-11.2794	-13.2205	-11.4083	-11.981
1476	chrII	459172	459179	+	NA	NA	NA	NA	0.651304	NA	NA	0.692362	NA	0.43184	0.413903	0.631034	0.967875	-0.997336	NA	NA	-1.90126	NA	-2.393	-2.56953	-3.33359	-2.46351
1477	chrII	459244	459291	+	NA	NA	NA	NA	0.359931	NA	NA	0.52524	0.27406	0.64776	0.526786	2.78397	0.382056	-2.57798	NA	NA	-10.7023	-1.98806	-10.136	-6.77769	-15.0798	-10.101
1478	chrII	459475	459556	+	NA	NA	NA	NA	NA	NA	NA	NA	NA	NA	0.602041	0.222718	NA	NA	NA	NA	NA	NA	NA	-11.6177	-4.16993	NA
1479	chrII	459780	459801	+	NA	NA	NA	NA	0.548466	0.322581	0.356996	NA	0.373718	0.455831	NA	0.519675	0.916934	-0.99718	-0.979869	-0.991076	NA	-0.996792	-0.981941	NA	-5.57324	-7.65941
1480	chrII	460871	460882	+	NA	NA	NA	NA	NA	NA	NA	NA	NA	NA	NA	0.259837	NA	NA	NA	NA	NA	NA	NA	NA	-3.40833	NA
1481	chrII	461648	461653	+	YBR111W-A	mRNA	SGD	inducible	NA	NA	NA	NA	NA	NA	NA	NA	0.483937	NA	NA	NA	NA	NA	NA	NA	NA	-3.55122
1482	chrII	461807	461901	+	YBR111W-A	mRNA	SGD	inducible	NA	NA	NA	NA	NA	NA	NA	0.408316	0.916934	NA	NA	NA	NA	NA	NA	NA	-11.6362	-15.9809
1484	chrII	461967	462368	+	YBR111W-A	mRNA	SGD	constitutive	81.1387	113.871	83.4578	54.0043	88.8951	76.0518	113.146	81.9601	104.683	-16.9498	-24.3491	-22.1279	-15.7786	-26.5221	-17.101	-29.8879	-17.6164	-22.7194
1485	chrII	462584	462587	+	NA	NA	NA	NA	NA	NA	NA	NA	NA	NA	NA	0.334077	NA	NA	NA	NA	NA	NA	NA	NA	-1.57082	NA
1486	chrII	465248	465250	+	YBR113W	mRNA	SGD	inducible	NA	NA	NA	NA	NA	NA	NA	0.259837	NA	NA	NA	NA	NA	NA	NA	NA	-0.985228	NA
1487	chrII	465853	465890	+	NA	NA	NA	NA	NA	NA	0.237997	0.238746	NA	NA	NA	0.482555	NA	NA	NA	-8.06344	-3.70044	NA	NA	NA	-7.64795	NA
1488	chrII	466150	466166	+	NA	NA	NA	NA	NA	NA	0.277664	0.811735	NA	NA	NA	0.482555	NA	NA	NA	-2.54678	-5.6519	NA	NA	NA	-6.10494	NA
1489	chrII	466705	466723	+	YBR114W	mRNA	SGD	inducible	NA	0.403227	0.277664	NA	NA	NA	NA	0.705273	NA	NA	-3.44833	-1.97046	NA	NA	NA	NA	-5.47274	NA
1490	chrII	467113	467450	+	YBR114W	mRNA	SGD	constitutive	20.0019	21.613	76.0005	64.2703	29.4241	44.1916	35.558	74.7961	96.9148	-33.8328	-24.952	-40.9667	-38.1666	-34.5437	-35.7632	-37.6081	-40.2174	-35.3673
1491	chrII	467474	467658	+	NA	NA	NA	NA	NA	0.349463	4.75995	3.31856	0.323889	2.711	1.58036	6.60729	3.64227	NA	-2.79536	-24.5602	-25.0896	-10.3793	-16.4004	-17.0919	-29.8547	-18.6492
1492	chrII	467709	467715	+	NA	NA	NA	NA	NA	NA	NA	NA	NA	NA	NA	0.334077	NA	NA	NA	NA	NA	NA	NA	NA	-2.37376	NA
1493	chrII	467866	467891	+	NA	NA	NA	NA	NA	NA	NA	0.26262	NA	NA	NA	0.222718	0.382056	NA	NA	NA	-4.22257	NA	NA	NA	-2.80735	-7.1782
1494	chrII	468137	468139	+	NA	NA	NA	NA	NA	NA	NA	NA	NA	NA	NA	0.519675	NA	NA	NA	NA	NA	NA	NA	NA	-0.940286	NA
1495	chrII	468256	468260	+	NA	NA	NA	NA	NA	NA	NA	NA	NA	0.311884	NA	NA	NA	NA	NA	NA	NA	NA	-1.92247	NA	NA	NA
1496	chrII	468995	468997	+	NA	NA	NA	NA	NA	NA	NA	NA	NA	NA	NA	NA	0.407526	NA	NA	NA	NA	NA	NA	NA	NA	-0.954434
1497	chrII	469343	469347	+	NA	NA	NA	NA	NA	NA	NA	NA	NA	NA	NA	NA	0.432997	NA	NA	NA	NA	NA	NA	NA	NA	-2.93618
1498	chrII	474296	474347	+	2F-190	XUT	Van_Dijk_2011	NA	NA	0.994626	1.58665	3.07982	1.61945	1.72736	1.20408	2.70973	0.331115	NA	-14.1797	-11.0565	-6.78112	-12.078	-9.66631	-11.3969	-9.20565	-7.74023
1499	chrII	474518	474590	+	2F-190	XUT	Van_Dijk_2011	NA	0.222814	NA	1.70565	6.5655	0.747436	1.48745	0.790178	2.63549	NA	-4.15211	NA	-11.8692	-14.3606	-7.8143	-13.2451	-12.222	-14.568	NA
1500	chrII	474651	474672	+	2F-190	XUT	Van_Dijk_2011	NA	NA	NA	0.555327	0.978857	NA	NA	0.376275	0.890871	NA	NA	NA	-4.10833	-7.87649	NA	NA	-1.58496	-9.43572	NA
1501	chrII	474719	474791	+	2F-190	XUT	Van_Dijk_2011	NA	NA	NA	2.57831	4.15417	NA	2.44709	1.05357	3.71196	NA	NA	NA	-13.7529	-11.0893	NA	-12.8672	-13.4678	-13.9604	NA
1502	chrII	474868	474883	+	2F-190	XUT	Van_Dijk_2011	NA	NA	NA	NA	0.453617	NA	NA	NA	NA	NA	NA	NA	NA	-3.89908	NA	NA	NA	NA	NA
1503	chrII	475557	475622	+	2F-190	XUT	Van_Dijk_2011	NA	NA	NA	NA	0.620739	NA	NA	NA	0.296957	NA	NA	NA	NA	-7.33188	NA	NA	NA	-8.94033	NA
1504	chrII	476210	476225	+	2F-190	XUT	Van_Dijk_2011	NA	NA	NA	NA	0.429742	NA	NA	NA	NA	NA	NA	NA	NA	-3.87203	NA	NA	NA	NA	NA
1505	chrII	476741	476786	+	YBR118W	mRNA	SGD	inducible	NA	NA	NA	NA	0.647778	0.791707	NA	0.371196	1.88481	NA	NA	NA	NA	-2.52108	-3.30269	NA	-3.26116	-10.2219
1506	chrII	476860	476996	+	YBR118W	mRNA	SGD	constitutive	0.976956	2.3656	1.34865	3.81993	9.84125	10.4121	1.16645	4.89979	9.72969	-5.62817	-18.613	-4.94402	-13.4785	-18.7014	-6.1803	-12.4373	-16.4571	-17.4409
1507	chrII	477150	477180	+	YBR118W	mRNA	SGD	inducible	NA	NA	NA	0.477491	0.473376	0.767715	NA	1.15071	0.331115	NA	NA	NA	-4.04879	-6.47519	-9.0975	NA	-9.62293	-2.49993
1508	chrII	477402	477419	+	YBR118W	mRNA	SGD	inducible	NA	NA	NA	NA	NA	NA	NA	0.482555	0.458467	NA	NA	NA	NA	NA	NA	NA	-3.63985	-6.3218
1509	chrII	477541	477676	+	YBR118W	mRNA	SGD	constitutive	6809.42	6048.08	5226.7	2520.39	2803.61	5781.35	5680.59	4818.09	2874.18	-6.31168	-4.60222	-2.00884	-2.15053	-1.58302	-2.04432	-1.97571	-2.10283	-5.40212
1510	chrII	478302	478497	+	NA	NA	NA	NA	21.5273	15.7796	10.3926	6.25513	4.83342	21.8559	22.7647	9.50263	7.9977	-30.8888	-24.641	-29.7527	-22.565	-24.4711	-30.8945	-31.6414	-29.8187	-26.9685
1511	chrII	479004	479007	+	YBR119W	mRNA	SGD	inducible	NA	NA	NA	NA	NA	NA	NA	NA	0.305645	NA	NA	NA	NA	NA	NA	NA	NA	-1.45546
1512	chrII	479185	479204	+	YBR119W	mRNA	SGD	inducible	NA	NA	NA	0.310369	NA	1.05561	NA	0.668153	NA	NA	NA	NA	-3.92902	NA	-8.01073	NA	-5.72291	NA
1513	chrII	479237	479338	+	YBR119W	mRNA	SGD	constitutive	8.46695	11.4248	9.00424	13.2026	34.7309	7.50922	9.33163	8.20344	19.2811	-20.1779	-13.6175	-20.5459	-14.5771	-17.9993	-15.257	-16.6952	-17.9036	-12.2243
1514	chrII	479408	479438	+	NA	NA	NA	NA	0.599885	0.376345	0.872657	NA	0.697607	0.767715	0.489158	1.07647	NA	-5.7833	-6.70071	-6.09735	NA	-8.36902	-10.9803	-4.22978	-8.24549	NA
1515	chrII	479686	479795	+	NA	NA	NA	NA	1.18263	0.860217	3.76829	6.5655	1.42013	4.00651	3.16071	7.12697	1.06976	-19.2383	-15.027	-18.0287	-15.3324	-13.9891	-18.0113	-18.4373	-18.1261	-19.163
1516	chrII	479882	479907	+	NA	NA	NA	NA	NA	NA	NA	NA	NA	NA	0.263393	0.482555	NA	NA	NA	NA	NA	NA	NA	-3.64578	-6.76733	NA
1517	chrII	483070	483079	+	NA	NA	NA	NA	NA	NA	NA	NA	NA	NA	NA	0.222718	NA	NA	NA	NA	NA	NA	NA	NA	-3.16993	NA
1518	chrII	483781	483793	+	CUT026	CUT	Xu_2009	NA	NA	0.430109	NA	NA	NA	NA	NA	NA	0.407526	NA	-5.543	NA	NA	NA	NA	NA	NA	-2.55575
1519	chrII	483897	483912	+	CUT026	CUT	Xu_2009	NA	NA	0.591399	NA	NA	NA	NA	NA	0.296957	NA	NA	-7.69597	NA	NA	NA	NA	NA	-2.21613	NA
1520	chrII	486005	486065	+	YBR124W	mRNA	SGD	inducible	NA	NA	NA	0.358118	NA	NA	NA	1.37343	0.967875	NA	NA	NA	-3.67318	NA	NA	NA	-9.26702	-14.4668
1521	chrII	488672	488676	+	NA	NA	NA	NA	0.617025	0.591399	NA	NA	0.523206	NA	NA	NA	NA	-1.30004	-1.80479	NA	NA	-1.83659	NA	NA	NA	NA
1522	chrII	488750	488764	+	NA	NA	NA	NA	NA	1.02151	NA	NA	NA	NA	NA	0.334077	NA	NA	-6.95394	NA	NA	NA	NA	NA	-2.13222	NA
1523	chrII	488879	488885	+	NA	NA	NA	NA	NA	0.349463	NA	NA	NA	NA	NA	NA	NA	NA	-4.07551	NA	NA	NA	NA	NA	NA	NA
1524	chrII	490623	490647	+	YBR126W-A	mRNA	SGD	inducible	NA	NA	NA	0.883359	0.323889	NA	NA	2.2643	NA	NA	NA	NA	-5.14879	-3.04705	NA	NA	-6.03435	NA
1526	chrII	490802	490940	+	YBR126W-A	mRNA	SGD	constitutive	208.143	281.103	250.294	450.561	453.52	313.876	232.237	362.919	287.408	-5.29954	-5.21756	-4.75614	-7.57021	-7.22319	-5.75795	-6.99049	-4.92364	-7.89325
1527	chrII	491193	491209	+	NA	NA	NA	NA	NA	NA	NA	NA	0.523206	NA	NA	NA	0.891464	NA	NA	NA	NA	-0.958712	NA	NA	NA	-5.46226
1528	chrII	493044	493292	+	CUT027	CUT	Xu_2009	NA	1.04551	2.55377	1.18999	0.954982	1.91842	0.623769	0.602041	1.74462	3.6168	-14.1659	-23.3313	-16.3283	-2.97095	-18.6437	-8.01078	-18.0426	-13.4741	-27.9469
1529	chrII	495570	495594	+	NA	NA	NA	NA	2.82803	1.02151	0.237997	1.57572	0.473376	1.43947	NA	1.37343	0.865993	-9.8889	-8.11594	-3.90689	-7.39814	-4.57295	-8.3031	NA	-7.56273	-7.63503
1530	chrII	497104	497217	+	YBR131W	mRNA	SGD	constitutive	8.91258	7.60755	5.43427	7.56824	15.2726	10.82	9.74553	17.372	8.91464	-16.0221	-19.5186	-16.1148	-12.2928	-18.0574	-18.2571	-12.3995	-11.9052	-15.9825
1531	chrII	497681	497683	+	NA	NA	NA	NA	NA	NA	NA	NA	NA	NA	NA	0.259837	NA	NA	NA	NA	NA	NA	NA	NA	-0.985228	NA
1532	chrII	497788	497858	+	NA	NA	NA	NA	1.02837	0.591399	0.63466	0.429742	1.07133	0.935653	0.338648	1.48479	0.993345	-5.03064	-8.37905	-8.50475	-8.93129	-11.4532	-5.39367	-12.0888	-14.5743	-3.48731
1533	chrII	498486	498489	+	NA	NA	NA	NA	NA	NA	NA	NA	NA	NA	NA	NA	0.331115	NA	NA	NA	NA	NA	NA	NA	NA	-1.52352
1534	chrII	499213	499259	+	NA	NA	NA	NA	NA	NA	NA	NA	NA	NA	NA	NA	0.585819	NA	NA	NA	NA	NA	NA	NA	NA	-10.5675
1535	chrII	501458	501460	+	NA	NA	NA	NA	NA	NA	NA	0.286495	NA	NA	NA	NA	NA	NA	NA	NA	-1	NA	NA	NA	NA	NA
1536	chrII	501813	501924	+	NA	NA	NA	NA	NA	0.510754	NA	3.50956	2.71569	1.77534	NA	3.19229	4.10073	NA	-14.4115	NA	-15.4076	-17.667	-12.9241	NA	-15.8498	-22.7648
1537	chrII	504574	504590	+	YBR135W	mRNA	SGD	inducible	0.634164	NA	0.356996	0.477491	NA	1.31951	0.376275	2.11582	NA	-2.72707	NA	-2.75489	-2.64387	NA	-5.74149	-3.58496	-6.62842	NA
1538	chrII	504731	504827	+	YBR135W	mRNA	SGD	constitutive	48.5564	41.2635	42.1652	34.5942	43.4261	33.6835	28.0702	46.2511	50.5842	-15.527	-15.2346	-15.7156	-12.6326	-12.3313	-15.6371	-16.4752	-15.0885	-13.0747
1539	chrII	504869	505267	+	NA	NA	NA	NA	15.8027	5.48388	12.2172	10.0751	8.74501	11.1799	8.12755	16.147	12.4041	-21.8126	-26.4529	-29.1393	-19.6064	-17.0371	-27.4893	-26.9745	-32.8815	-16.0989
1540	chrII	505572	505799	+	YBR136W	mRNA	SGD	constitutive	10.1466	17.1506	14.6368	58.2301	15.6214	22.0238	13.2825	28.0996	17.6255	-19.4624	-19.8763	-16.185	-20.7977	-18.4327	-16.3868	-18.8556	-18.1602	-15.7117
1541	chrII	506528	506531	+	NA	NA	NA	NA	NA	NA	NA	0.238746	NA	NA	NA	NA	NA	NA	NA	NA	-1.58496	NA	NA	NA	NA	NA
1542	chrII	509243	509263	+	NA	NA	NA	NA	NA	NA	NA	NA	0.323889	NA	NA	NA	NA	NA	NA	NA	NA	-4.1544	NA	NA	NA	NA
1543	chrII	509439	509442	+	NA	NA	NA	NA	NA	NA	NA	NA	NA	0.335876	NA	NA	NA	NA	NA	NA	NA	NA	-1.56155	NA	NA	NA
1544	chrII	509607	509622	+	NA	NA	NA	NA	NA	NA	NA	NA	NA	NA	NA	0.334077	NA	NA	NA	NA	NA	NA	NA	NA	-3.58768	NA
1545	chrII	509888	509904	+	NA	NA	NA	NA	NA	NA	NA	NA	NA	0.239911	NA	NA	NA	NA	NA	NA	NA	NA	-4	NA	NA	NA
1546	chrII	512478	512486	+	NA	NA	NA	NA	0.274233	NA	NA	NA	0.323889	0.527804	NA	0.371196	0.534878	-2.9661	NA	NA	NA	-2.98718	-2.70718	NA	-2.64387	-4.22993
1547	chrII	512690	512726	+	YBR137W	mRNA	SGD	inducible	NA	NA	NA	0.453617	NA	NA	0.30102	0.222718	NA	NA	NA	NA	-2.08914	NA	NA	-4.05437	-2.32193	NA
1549	chrII	512898	513390	+	YBR137W	mRNA	SGD	constitutive	180.548	95.968	159.538	162.252	89.3934	134.59	187.159	180.03	118.463	-25.6887	-19.0575	-22.4499	-25.4084	-24.7607	-26.4751	-26.8233	-19.895	-27.5812
1550	chrII	513450	513462	+	NA	NA	NA	NA	NA	NA	NA	NA	NA	NA	NA	0.259837	NA	NA	NA	NA	NA	NA	NA	NA	-3.53201	NA
1551	chrII	515601	516111	+	YBR139W	mRNA	SGD	constitutive	135.077	144.275	160.252	217.855	173.505	138.693	152.693	147.402	224.19	-6.90351	-4.75862	-8.00336	-14.3813	-8.0372	-9.18528	-8.36196	-14.3307	-6.10095
1552	chrII	516235	516244	+	NA	NA	NA	NA	0.359931	NA	NA	0.501366	NA	NA	NA	NA	0.432997	-3.1231	NA	NA	-2.51013	NA	NA	NA	NA	-3.09834
1553	chrII	516313	516476	+	NA	NA	NA	NA	1.54256	0.322581	0.872657	2.93657	1.29556	1.51144	1.919	4.86267	2.44516	-17.4209	-11.2258	-16.092	-21.9549	-15.0654	-12.6332	-15.2877	-24.7837	-18.4921
1554	chrII	516648	516833	+	NA	NA	NA	NA	1.61112	0.645163	0.396662	0.644613	0.54812	0.623769	0.790178	1.48479	2.41969	-14.6817	-3.01771	-14.7799	-16.2354	-14.4505	-13.9801	-14.9477	-21.2401	-19.3146
1555	chrII	516882	517003	+	NA	NA	NA	NA	0.41135	0.268818	0.237997	NA	NA	0.719733	NA	0.334077	1.40087	-7.68062	-1.53892	-13.3464	NA	NA	-8.93459	NA	-10.5549	-9.16104
1556	chrII	527113	527222	+	NA	NA	NA	NA	7.38716	5.40324	6.1086	11.8895	8.81975	6.98141	3.76275	12.6949	8.25241	-15.3538	-13.2919	-15.4996	-12.8439	-13.2983	-13.0976	-11.4011	-14.0742	-15.6953
1557	chrII	528194	528371	+	YBR142W	mRNA	SGD	constitutive	29.6	44.5431	46.9252	24.3998	11.5853	43.8557	71.4923	36.7484	26.4128	-8.5419	-9.60021	-2.1994	-2.49606	-4.98266	-0.963212	-4.05268	-2.37122	-8.27036
1558	chrII	528440	528492	+	NA	NA	NA	NA	NA	0.241936	0.475995	NA	NA	1.6074	NA	0.259837	0.382056	NA	-8.1559	-8.30963	NA	NA	-16.4517	NA	-8.96465	-8.79591
1559	chrII	528679	528758	+	NA	NA	NA	NA	NA	NA	NA	0.596864	NA	NA	0.602041	0.334077	NA	NA	NA	NA	-4.74271	NA	NA	-8.87776	-5.26513	NA
1560	chrII	528939	528967	+	NA	NA	NA	NA	0.719862	0.779572	1.03132	0.358118	0.27406	0.64776	1.88138	0.519675	0.815053	-5.59362	-0.797327	0	-1.45546	-0.99403	-0.764205	-0.826746	-3.19393	-1.40509
1561	chrII	529319	529331	+	NA	NA	NA	NA	NA	NA	0.872657	NA	NA	1.55942	NA	0.519675	NA	NA	NA	-2.58545	NA	NA	0	NA	-2.37616	NA
1562	chrII	529588	529590	+	NA	NA	NA	NA	NA	0.241936	NA	NA	NA	NA	NA	NA	NA	NA	-0.991076	NA	NA	NA	NA	NA	NA	NA
1563	chrII	529940	529965	+	NA	NA	NA	NA	0.205675	0.403227	0.674326	NA	0.373718	0.599778	0.752551	NA	0.356586	-4	-3.96872	-3.49592	NA	-3.96872	-3.61753	-3.07784	NA	-3.76114
1564	chrII	530046	530049	+	NA	NA	NA	NA	NA	NA	0.31733	NA	NA	0.263902	0.225765	NA	NA	NA	NA	-1.51274	NA	NA	-1.5755	-1.58496	NA	NA
1565	chrII	530158	530179	+	NA	NA	NA	NA	NA	NA	NA	NA	NA	NA	NA	0.371196	NA	NA	NA	NA	NA	NA	NA	NA	-6.90011	NA
1566	chrII	530250	530265	+	NA	NA	NA	NA	NA	0.403227	NA	NA	NA	NA	0.451531	0.222718	NA	NA	-3.29206	NA	NA	NA	NA	-2.9084	-2	NA
1567	chrII	532464	532579	+	2F-206	XUT	Van_Dijk_2011	NA	6.34164	7.36561	5.31528	14.6112	20.106	6.35764	5.49362	16.2584	13.8304	-14.3593	-17.1549	-15.8583	-15.2386	-16.0418	-17.4308	-17.7474	-19.4682	-19.1337
1568	chrII	532665	532674	+	2F-206	XUT	Van_Dijk_2011	NA	NA	NA	NA	NA	0.323889	NA	NA	NA	NA	NA	NA	NA	NA	-3.04705	NA	NA	NA	NA
1569	chrII	533484	533555	+	YBR145W	mRNA	SGD	inducible	NA	NA	NA	NA	NA	NA	NA	NA	0.789582	NA	NA	NA	NA	NA	NA	NA	NA	-14.2134
1571	chrII	533627	533762	+	YBR145W	mRNA	SGD	constitutive	53.904	53.5216	32.685	54.9354	92.6572	51.7248	109.383	50.7797	47.706	-5.78515	-5.83658	-6.30071	-6.16521	-7.47648	-5.51322	-6.53585	-6.10072	-6.82239
1572	chrII	533789	534073	+	NA	NA	NA	NA	6.56446	2.82259	4.75995	5.89702	4.73376	6.14172	11.815	6.79289	7.41188	-30.1948	-22.1395	-29.9292	-29.3102	-30.3746	-30.5555	-31.5744	-34.1468	-32.7886
1573	chrII	534254	534420	+	NA	NA	NA	NA	8.99828	5.53765	3.0543	6.35063	8.67026	4.70226	12.7934	1.8931	9.06746	-17.3309	-20.5909	-12.1536	-18.1063	-21.6849	-17.84	-23.5713	-16.7059	-16.9824
1574	chrII	534473	534498	+	NA	NA	NA	NA	NA	NA	NA	NA	NA	NA	0.413903	NA	0.356586	NA	NA	NA	NA	NA	NA	-5.8194	NA	-3.47947
1575	chrII	535164	535425	+	YBR146W	mRNA	SGD	constitutive	36.5587	45.9947	51.6851	47.4388	69.2375	33.8994	55.9522	49.6289	51.5011	-16.3937	-18.2934	-17.1135	-15.1258	-16.9941	-18.0482	-19.1862	-17.9261	-16.8442
1576	chrII	535478	535486	+	NA	NA	NA	NA	NA	NA	0.237997	NA	NA	NA	NA	NA	NA	NA	NA	-3	NA	NA	NA	NA	NA	NA
1577	chrII	535535	535545	+	NA	NA	NA	NA	NA	NA	1.30899	NA	1.49487	NA	1.0912	1.55902	1.60463	NA	NA	-0.844524	NA	-2.37834	NA	0	-0.997336	0
1578	chrII	535709	535785	+	NA	NA	NA	NA	0.239954	NA	1.22965	NA	0.872009	NA	0.827806	0.668153	0.942405	-8.53755	NA	-9.35247	NA	-10.131	NA	-13.7166	-12.5069	-11.8288
1579	chrII	535911	535933	+	NA	NA	NA	NA	0.839839	0.564518	1.22965	NA	1.76893	0.959644	1.73087	0.631034	1.70652	-5.93101	-2.93022	-3.67491	NA	-1.73549	-5.41725	-4.17969	-2.48779	-7.80667
1580	chrII	536400	536593	+	YBR147W	mRNA	SGD	constitutive	7.55855	14.4086	29.2737	76.6373	65.3509	22.5996	59.7525	27.8768	73.4057	-25.7335	-26.259	-25.6175	-29.2945	-26.523	-24.5146	-17.727	-29.3817	-18.4688
1581	chrII	536613	536651	+	NA	NA	NA	NA	NA	NA	NA	1.86222	1.7191	NA	1.31696	0.296957	2.21592	NA	NA	NA	-8.7667	-11.9413	NA	-8.52939	-3.17056	-13.4387
1582	chrII	536698	536706	+	NA	NA	NA	NA	NA	NA	NA	1.24148	0.896924	0.407849	1.12883	0.631034	1.29899	NA	NA	NA	-0.890492	-0.997772	-0.936667	-5.16578	-1.73786	-0.997059
1583	chrII	536743	536773	+	NA	NA	NA	NA	NA	NA	0.674326	2.31583	0.597949	NA	1.16645	0.705273	1.24805	NA	NA	-1.38523	-1.23012	-1.51274	NA	-3.10478	-4.70502	-4.27075
1584	chrII	537287	537290	+	NA	NA	NA	NA	NA	NA	NA	NA	0.27406	NA	NA	NA	0.432997	NA	NA	NA	NA	-1.5755	NA	NA	NA	-1.54917
1585	chrII	537706	537721	+	YBR148W	mRNA	SGD	inducible	NA	0.483872	NA	NA	NA	NA	0.30102	0.334077	0.483937	NA	-3.71077	NA	NA	NA	NA	-1.90887	-5.68203	-2.08443
1586	chrII	537905	537909	+	NA	NA	NA	NA	NA	NA	NA	NA	NA	NA	NA	0.371196	NA	NA	NA	NA	NA	NA	NA	NA	-1.9419	NA
1587	chrII	538294	538314	+	NA	NA	NA	NA	NA	NA	NA	0.238746	0.448462	NA	NA	0.371196	NA	NA	NA	NA	-3.45943	-4.06238	NA	NA	-4.19638	NA
1588	chrII	538460	538568	+	NA	NA	NA	NA	0.80556	0.725808	0.912323	5.49115	1.3703	0.239911	0.376275	4.41724	1.17164	-14.4548	-10.4658	-17.8834	-20.7135	-14.8656	-12.7767	-7.87835	-21.2036	-18.4082
1589	chrII	538722	538767	+	NA	NA	NA	NA	NA	0.430109	0.912323	1.90996	0.54812	NA	NA	2.22718	0.458467	NA	-6.79196	-10.5351	-14.0634	-6.77184	NA	NA	-17.25	-4.96807
1590	chrII	539031	539097	+	NA	NA	NA	NA	NA	NA	NA	NA	NA	NA	NA	0.631034	NA	NA	NA	NA	NA	NA	NA	NA	-13.9456	NA
1591	chrII	539241	539246	+	NA	NA	NA	NA	NA	NA	NA	0.501366	NA	NA	NA	0.482555	NA	NA	NA	NA	-2.13222	NA	NA	NA	-2.06766	NA
1592	chrII	539309	539360	+	NA	NA	NA	NA	NA	NA	NA	NA	NA	NA	NA	0.593914	NA	NA	NA	NA	NA	NA	NA	NA	-11.2156	NA
1593	chrII	539459	539491	+	NA	NA	NA	NA	0.497048	1.23656	0.793325	0.692362	NA	0.407849	0.752551	0.96511	NA	-6.55806	-9.11586	-7.93829	-8.20914	NA	-3.13319	-5.71676	-9.38236	NA
1595	chrII	539871	540486	+	YBR149W	mRNA	SGD	constitutive	327.863	204.49	341.566	372.682	496.995	267.405	264.032	297.588	529.962	-26.9108	-27.4166	-27.942	-25.827	-24.287	-27.6135	-25.3313	-22.552	-26.9593
1596	chrII	540540	540730	+	NA	NA	NA	NA	7.37002	3.19893	5.15661	5.70602	7.15048	4.77423	3.61224	4.30588	12.9135	-16.6154	-14.3402	-17.0852	-13.1011	-18.2931	-17.2449	-13.748	-19.9348	-19.3575
1597	chrII	541246	541263	+	NA	NA	NA	NA	NA	NA	NA	NA	NA	NA	NA	0.334077	NA	NA	NA	NA	NA	NA	NA	NA	-3.7535	NA
1598	chrII	544810	545007	+	YBR151W	mRNA	SGD	constitutive	126.884	114.382	137.801	195.366	187.656	142.603	142.872	165.888	188.888	-21.3378	-23.7794	-24.8005	-27.9446	-26.398	-26.8926	-26.8829	-28.5021	-24.5642
1599	chrII	545031	545461	+	NA	NA	NA	NA	13.0432	6.15593	18.1671	20.2934	20.4798	23.2714	19.6416	22.4945	27.9156	-38.9718	-35.6561	-33.3176	-36.4218	-39.0732	-33.0566	-38.4664	-34.0281	-36.0104
1600	chrII	545729	545768	+	NA	NA	NA	NA	0.291373	0.564518	NA	0.644613	0.498291	0.335876	1.05357	0.927991	0.891464	-2.93225	-5.38515	NA	-7.19399	-3	-3.99427	-9.02593	-13.5565	-9.05983
1601	chrII	546284	546440	+	YBR152W	mRNA	SGD	constitutive	4.81622	2.25807	9.5199	10.5048	8.59552	4.79822	7.14923	8.27768	5.96007	-21.6171	-18.4754	-27.3489	-23.3962	-23.4079	-23.1609	-24.5304	-27.8744	-21.6007
1602	chrII	546501	546843	+	NA	NA	NA	NA	3.92496	NA	8.68691	9.95569	2.69077	5.6619	1.69324	18.5969	5.45066	-27.1203	NA	-33.9533	-30.9421	-31.6762	-27.9476	-28.9047	-35.8406	-32.1431
1603	chrII	547020	547091	+	YBR153W	mRNA	SGD	inducible	NA	NA	0.555327	NA	NA	NA	NA	1.00223	0.331115	NA	NA	-14.1092	NA	NA	NA	NA	-13.9663	-12.0687
1604	chrII	547299	547329	+	YBR153W	mRNA	SGD	inducible	NA	NA	NA	NA	NA	0.575787	NA	1.11359	NA	NA	NA	NA	NA	NA	-6.51775	NA	-7.81562	NA
1605	chrII	547370	547532	+	YBR153W	mRNA	SGD	constitutive	13.0261	6.15593	8.36958	6.99525	6.75184	7.24531	5.56888	18.0773	11.8947	-23.3364	-12.9643	-19.5817	-18.0113	-13.6859	-18.0452	-13.9048	-24.9854	-10.2749
1606	chrII	547667	547702	+	NA	NA	NA	NA	NA	NA	NA	0.644613	NA	NA	NA	1.22495	0.891464	NA	NA	NA	-5.83107	NA	NA	NA	-11.2829	-12.5134
1607	chrII	547792	547839	+	NA	NA	NA	NA	0.274233	NA	NA	0.26262	NA	NA	NA	NA	NA	-8.03553	NA	NA	-0.99403	NA	NA	NA	NA	NA
1608	chrII	547926	547955	+	NA	NA	NA	NA	0.925537	1.63979	NA	1.62347	1.76893	NA	3.38648	2.15294	1.3754	-1.91705	-5.50297	NA	-2.22832	-5.32854	NA	-2.89526	-1.91705	-7.09948
1609	chrII	549670	549793	+	YBR155W	mRNA	SGD	constitutive	26.652	33.7366	28.282	10.4093	5.05765	20.4404	41.2022	18.0773	19.7905	-16.4152	-22.0682	-17.6236	-13.3137	-14.1527	-14.7897	-19.6954	-19.3051	-19.2531
1610	chrII	549826	549828	+	NA	NA	NA	NA	0.39421	NA	NA	NA	NA	0.383858	NA	NA	NA	-0.932112	NA	NA	NA	NA	-0.954434	NA	NA	NA
1611	chrII	549966	550190	+	NA	NA	NA	NA	3.25652	1.66667	5.27561	1.62347	0.323889	4.03051	4.21429	2.52413	3.6168	-23.7008	-19.2832	-20.9227	-15.1794	-10.4347	-18.2178	-21.7553	-24.666	-22.6065
1612	chrII	550284	550291	+	NA	NA	NA	NA	0.325652	0.887099	0.713992	NA	NA	0.551795	0.865434	0.742393	0.331115	-2.5259	-4.06257	-2.70651	NA	NA	-2.80353	-2.71088	-2.27755	-0.890492
1613	chrII	550506	550523	+	NA	NA	NA	NA	0.257094	NA	0.713992	NA	NA	NA	0.677296	NA	NA	-0.996792	NA	-0.918296	NA	NA	NA	-7.61832	NA	NA
1614	chrII	550750	550756	+	NA	NA	NA	NA	0.565606	0.349463	0.872657	NA	NA	NA	NA	0.334077	0.585819	-2.58325	-2.30189	-2.52298	NA	NA	NA	NA	-2.56189	-2.58144
1615	chrII	553397	553411	+	NA	NA	NA	NA	0.445629	0.241936	0.396662	0.405868	NA	NA	NA	0.334077	NA	-3.65977	-3.77338	-3.69675	-5.66375	NA	NA	NA	-3.29206	NA
1616	chrII	553465	553541	+	SUT020	SUT	Xu_2009	NA	2.63949	NA	NA	NA	NA	NA	NA	NA	NA	-12.2183	NA	NA	NA	NA	NA	NA	NA	NA
1617	chrII	554515	554527	+	SUT020	SUT	Xu_2009	NA	NA	NA	NA	NA	NA	NA	NA	0.556794	NA	NA	NA	NA	NA	NA	NA	NA	-2.58809	NA
1618	chrII	554659	554723	+	SUT020	SUT	Xu_2009	NA	NA	NA	NA	3.19919	0.448462	1.48745	0.376275	2.67261	0.483937	NA	NA	NA	-7.45221	-8.40803	-15.9346	-2.2781	-8.5106	-10.3182
1619	chrII	554907	555116	+	SUT020	SUT	Xu_2009	NA	1.14835	0.618281	2.41964	20.2456	4.40988	7.24531	3.57462	13.2146	7.4883	-14.126	-15.3821	-18.0821	-29.4145	-18.0867	-28.3552	-19.0866	-23.2211	-25.2605
1620	chrII	555215	555302	+	SUT020	SUT	Xu_2009	NA	3.34222	4.11291	5.91027	13.5608	4.65902	3.35876	3.83801	17.5576	2.9291	-11.1544	-11.8335	-12.5377	-11.4781	-12.3819	-12.2416	-10.714	-12.7339	-14.3464
1621	chrII	555353	555598	+	SUT020	SUT	Xu_2009	NA	3.30794	7.25808	9.59923	50.3514	13.0054	15.0424	7.82653	29.5843	14.5945	-9.15426	-16.7639	-13.1861	-13.2715	-19.4022	-15.9846	-18.6856	-13.9606	-19.8683
1622	chrII	555784	555853	+	YBR158W	mRNA	SGD	inducible	NA	NA	NA	0.501366	NA	NA	NA	0.222718	NA	NA	NA	NA	-8.46774	NA	NA	NA	-9.59619	NA
1623	chrII	555932	556009	+	YBR158W	mRNA	SGD	inducible	NA	NA	NA	NA	NA	NA	NA	1.07647	2.34328	NA	NA	NA	NA	NA	NA	NA	-9.15241	-13.5795
1624	chrII	556063	556355	+	YBR158W	mRNA	SGD	constitutive	260.71	70.8873	34.7476	129.854	57.4529	49.9495	64.3055	119.265	31.1248	-0.144895	-5.16661	-10.5866	-3.52885	-4.05161	-4.75715	-3.36417	-4.12759	-8.22044
1625	chrII	556370	556455	+	YBR158W	mRNA	SGD	inducible	1.25119	NA	NA	0.52524	NA	NA	NA	0.927991	NA	-10.4375	NA	NA	-8.53863	NA	NA	NA	-11.817	NA
1626	chrII	556539	556636	+	NA	NA	NA	NA	6.59874	NA	0.475995	2.67395	0.448462	1.41548	1.16645	3.93468	0.229234	-7.83216	NA	-8.17478	-9.01071	-7.60182	-8.03697	-4.76379	-10.1381	-6.00843
1627	chrII	556678	556732	+	NA	NA	NA	NA	2.91373	0.268818	0.63466	4.20192	1.1959	1.19956	0.677296	2.85821	1.47728	-11.1531	-2.91285	-6.31774	-9.67474	-7.83113	-8.12011	-11.8977	-12.2219	-5.46823
1628	chrII	556908	556925	+	NA	NA	NA	NA	1.79966	NA	NA	0.358118	0.323889	0.263902	NA	0.631034	NA	-7.09372	NA	NA	-3.59294	-3.65977	-3.78463	NA	-9.43055	NA
1629	chrII	556995	557045	+	NA	NA	NA	NA	2.58808	NA	0.475995	0.740111	NA	0.479822	NA	1.74462	0.534878	-10.1255	NA	-10.3636	-0.823812	NA	-0.811278	NA	-10.4911	-0.791858
1630	chrII	557105	557156	+	NA	NA	NA	NA	NA	NA	NA	1.93384	NA	NA	NA	0.779512	NA	NA	NA	NA	-9.81376	NA	NA	NA	-9.99719	NA
1631	chrII	557266	557410	+	NA	NA	NA	NA	10.0267	2.25807	3.84762	0.477491	4.38496	2.711	0.752551	7.5724	2.26686	-21.2551	-20.7635	-17.8761	-12.9289	-19.8804	-16.1878	-11.8799	-17.3065	-16.9858
1632	chrII	557478	557496	+	NA	NA	NA	NA	0.719862	NA	NA	NA	0.373718	NA	NA	0.593914	NA	-3.94091	NA	NA	NA	-3.8838	NA	NA	-5.9202	NA
1633	chrII	557812	557831	+	NA	NA	NA	NA	1.54256	NA	NA	NA	0.597949	NA	0.263393	0.408316	NA	-3.94555	NA	NA	NA	-5.28729	NA	-3.64578	-6.41954	NA
1634	chrII	558313	558320	+	YBR159W	mRNA	SGD	inducible	NA	NA	NA	NA	NA	NA	0.30102	NA	NA	NA	NA	NA	NA	NA	NA	-2.67943	NA	NA
1635	chrII	558594	558770	+	YBR159W	mRNA	SGD	constitutive	154.805	154.812	128.4	58.0629	58.9229	135.19	125.036	98.1443	111.229	-15.4779	-15.8075	-11.4954	-11.4429	-15.7196	-13.059	-13.2772	-14.3364	-16.1614
1636	chrII	558850	558986	+	NA	NA	NA	NA	1.61112	0.376345	1.22965	0.381993	0.348804	1.72736	1.99426	1.93022	1.47728	-13.9605	-1.49032	-7.25989	-9.46186	-13.8693	-18.4558	-18.4263	-19.3817	-17.9949
1637	chrII	559051	559180	+	NA	NA	NA	NA	3.1194	0.510754	2.22131	0.358118	NA	2.92692	2.29528	1.67038	1.85934	-20.9499	-17.7195	-21.5722	-13.6778	NA	-20.1526	-19.5901	-19.5308	-20.4092
1638	chrII	559258	559403	+	NA	NA	NA	NA	11.1921	3.19893	4.79961	1.4086	1.46996	8.39689	6.9611	2.85821	8.15053	-27.9644	-19.7733	-23.7016	-19.7676	-19.4968	-25.0948	-27.047	-21.3581	-23.7338
1639	chrII	559843	559860	+	YBR160W	mRNA	SGD	inducible	NA	NA	NA	0.596864	NA	0.815698	NA	2.04158	NA	NA	NA	NA	-6.41333	NA	-5.57773	NA	-7.86208	NA
1640	chrII	559912	560229	+	YBR160W	mRNA	SGD	constitutive	47.5795	48.656	73.1445	39.1065	36.3503	51.1011	40.6001	46.6223	55.933	-21.8446	-21.9883	-17.8687	-19.4057	-21.8022	-19.1494	-20.8423	-15.778	-23.4213
1641	chrII	560362	560446	+	NA	NA	NA	NA	1.09693	NA	0.674326	NA	0.298975	0.575787	0.376275	0.296957	1.34993	-11.8483	NA	-11.8964	NA	-8.64843	-7.46867	-8.35676	-9.13119	-16.4518
1642	chrII	560537	560552	+	NA	NA	NA	NA	NA	NA	NA	NA	0.298975	NA	NA	NA	NA	NA	NA	NA	NA	-3.82824	NA	NA	NA	NA
1643	chrII	560621	560653	+	NA	NA	NA	NA	0.257094	NA	NA	NA	NA	NA	NA	0.371196	0.305645	-3.59294	NA	NA	NA	NA	NA	NA	-6.67328	-3.96881
1644	chrII	560718	560729	+	NA	NA	NA	NA	NA	0.215054	NA	NA	NA	NA	NA	NA	NA	NA	-3.45943	NA	NA	NA	NA	NA	NA	NA
1645	chrII	561321	561675	+	YBR161W	mRNA	SGD	constitutive	18.4593	36.156	24.3947	26.453	38.3684	38.3618	13.8846	43.1701	66.707	-35.7148	-38.2758	-33.5097	-33.1548	-38.2011	-34.6447	-32.2132	-31.0411	-36.7893
1646	chrII	561705	561775	+	NA	NA	NA	NA	0.205675	NA	1.11065	NA	0.498291	0.43184	0.413903	1.29919	NA	-3.32193	NA	-15.8547	NA	-7.57297	-7.9178	-7.97369	-17.5679	NA
1647	chrII	562395	562420	+	NA	NA	NA	NA	NA	NA	NA	NA	NA	NA	NA	NA	1.50275	NA	NA	NA	NA	NA	NA	NA	NA	-15.0145
1648	chrII	563196	563227	+	NA	NA	NA	NA	NA	NA	NA	3.79606	0.423547	NA	NA	2.11582	0.585819	NA	NA	NA	-9.30807	-2.74396	NA	NA	-12.6236	-6.41138
1649	chrII	564786	564864	+	YBR162W-A	mRNA	SGD	constitutive	7.04437	1.93549	2.06264	3.05594	1.09624	10.724	1.76849	10.0594	1.27352	-4.68189	-2.05	-2.14049	-4.49351	-1.76821	-7.35192	-4.67797	-2.81298	-5.16081
1650	chrII	564972	565019	+	YBR162W-A	mRNA	SGD	constitutive	80.9845	12.9033	3.60963	5.96864	4.16073	10.2202	3.57462	10.9874	8.25241	-11.817	-11.9546	-9.79915	-10.6633	-10.5137	-14.4925	-13.7465	-11.5943	-10.4376
1651	chrII	565078	565113	+	YBR162W-A	mRNA	SGD	inducible	1.61112	NA	NA	NA	NA	NA	NA	NA	NA	-5.80586	NA	NA	NA	NA	NA	NA	NA	NA
1652	chrII	565164	565289	+	YBR162W-A	mRNA	SGD	constitutive	430.238	622.905	265.684	203.364	307.47	380.715	356.258	256.348	313.362	-15.1831	-13.6524	-13.1263	-13.1463	-14.6887	-15.1417	-13.8565	-14.3443	-14.3496
1653	chrII	565320	565322	+	YBR163W	mRNA	SGD	inducible	NA	1.04839	NA	NA	NA	NA	NA	NA	0.254704	NA	-0.552495	NA	NA	NA	NA	NA	NA	-0.970951
1654	chrII	565503	565521	+	YBR163W	mRNA	SGD	inducible	NA	NA	NA	0.716237	NA	1.03162	NA	2.41278	NA	NA	NA	NA	-4.52745	NA	-5.30407	NA	-4.45944	NA
1655	chrII	565595	566055	+	YBR163W	mRNA	SGD	constitutive	25.4009	29.3012	17.6911	41.5656	43.2517	25.2866	21.1091	44.5436	40.4215	-33.8114	-26.2736	-34.3772	-32.4197	-32.0872	-30.9267	-34.0056	-37.058	-25.2039
1656	chrII	566144	566147	+	NA	NA	NA	NA	NA	NA	NA	NA	NA	NA	NA	0.371196	NA	NA	NA	NA	NA	NA	NA	NA	-2.4899	NA
1657	chrII	566212	566266	+	NA	NA	NA	NA	NA	NA	NA	NA	NA	NA	NA	1.03935	NA	NA	NA	NA	NA	NA	NA	NA	-14.4368	NA
1658	chrII	566470	566473	+	NA	NA	NA	NA	NA	NA	NA	NA	NA	NA	NA	0.556794	0.305645	NA	NA	NA	NA	NA	NA	NA	-1.32604	-1.45546
1659	chrII	566611	566613	+	NA	NA	NA	NA	0.41135	NA	NA	NA	1.24573	0.407849	NA	0.890871	0.585819	-0.979869	NA	NA	NA	-0.826746	-0.977418	NA	-0.979869	-0.932112
1660	chrII	566834	566838	+	NA	NA	NA	NA	NA	NA	NA	NA	NA	NA	NA	0.556794	NA	NA	NA	NA	NA	NA	NA	NA	-1.9419	NA
1661	chrII	568725	568900	+	YBR165W	mRNA	SGD	constitutive	36.0617	36.6399	24.9501	45.0035	70.6327	39.0815	28.1454	46.0655	47.6551	-4.93767	-5.00599	-5.6373	-4.35773	-5.04852	-12.5265	-9.89657	-19.6942	-10.7267
1662	chrII	568969	569039	+	NA	NA	NA	NA	1.26833	0.537636	1.15032	2.93657	2.44163	2.63902	1.61798	3.04381	3.92244	-5.24433	-1.86616	-8.80919	-9.30774	-3.16082	-9.41029	-6.63051	-13.2058	-11.8045
1663	chrII	569226	569372	+	NA	NA	NA	NA	1.04551	0.887099	0.356996	2.19646	2.26722	2.18319	1.58036	3.71196	2.0631	-13.9253	-17.6214	-12.8837	-18.9182	-12.9918	-21.6021	-18.8777	-21.3826	-17.7086
1664	chrII	571395	571434	+	YBR168W	mRNA	SGD	inducible	NA	0.75269	NA	NA	NA	NA	NA	0.519675	0.534878	NA	-9.07918	NA	NA	NA	NA	NA	-6.08169	-10.4117
1665	chrII	571798	571802	+	YBR168W	mRNA	SGD	inducible	NA	NA	NA	NA	NA	NA	NA	NA	0.407526	NA	NA	NA	NA	NA	NA	NA	NA	-3.09236
1666	chrII	571992	572116	+	YBR168W	mRNA	SGD	constitutive	15.5113	8.76346	12.1379	14.2292	15.9702	8.94868	8.91773	42.5762	10.5957	-15.1842	-18.8003	-13.6756	-16.1011	-20.3575	-17.3673	-15.657	-13.3905	-19.7692
1667	chrII	572162	572178	+	YBR168W	mRNA	SGD	inducible	NA	NA	0.277664	0.238746	NA	NA	NA	0.668153	NA	NA	NA	-1.97046	-3.70044	NA	NA	NA	-7.67318	NA
1668	chrII	572227	572288	+	YBR168W	mRNA	SGD	constitutive	5.22757	8.62905	2.85597	10.7674	8.24672	6.35764	4.55293	5.04827	7.15718	-3.93202	-5.97629	-5.60095	-3.29349	-9.82861	-5.10939	-3.46182	-4.29011	-10.0839
1669	chrII	572422	572446	+	NA	NA	NA	NA	NA	NA	NA	NA	NA	NA	0.225765	NA	0.356586	NA	NA	NA	NA	NA	NA	-4.24793	NA	-2.23113
1670	chrII	572697	572699	+	NA	NA	NA	NA	NA	NA	NA	NA	NA	0.311884	NA	NA	0.432997	NA	NA	NA	NA	NA	-0.995727	NA	NA	-0.997503
1671	chrII	572750	572761	+	NA	NA	NA	NA	NA	NA	NA	NA	NA	NA	NA	0.408316	NA	NA	NA	NA	NA	NA	NA	NA	-3.43878	NA
1672	chrII	573050	573052	+	NA	NA	NA	NA	NA	NA	NA	NA	NA	NA	NA	NA	0.229234	NA	NA	NA	NA	NA	NA	NA	NA	-0.991076
1673	chrII	576325	576390	+	CUT029	CUT	Xu_2009	NA	2.98229	1.80108	0.555327	1.45635	1.14607	5.87782	0.413903	2.52413	1.78293	-14.1128	-13.0334	-7.46564	-8.02839	-8.95505	-13.5649	-7.78697	-12.3776	-12.7032
1674	chrII	576602	576610	+	CUT029	CUT	Xu_2009	NA	NA	NA	NA	NA	NA	NA	0.376275	NA	NA	NA	NA	NA	NA	NA	NA	-3	NA	NA
1675	chrII	578296	578663	+	YBR171W	mRNA	SGD	constitutive	87.0005	79.5163	76.4368	46.9851	44.7964	68.1587	68.9713	56.6074	84.7909	-15.0812	-11.277	-14.8195	-13.6516	-10.2627	-16.7729	-11.7083	-18.3405	-16.1396
1676	chrII	578743	578748	+	NA	NA	NA	NA	0.891258	NA	0.277664	NA	NA	NA	0.639668	NA	0.509408	-1.47494	NA	-1.56155	NA	NA	NA	-3.44495	NA	-1.14423
1677	chrII	578820	578837	+	NA	NA	NA	NA	NA	NA	NA	NA	NA	NA	NA	NA	0.229234	NA	NA	NA	NA	NA	NA	NA	NA	-4.05099
1678	chrII	580340	580348	+	NA	NA	NA	NA	NA	NA	NA	NA	NA	NA	NA	0.408316	NA	NA	NA	NA	NA	NA	NA	NA	-4.61845	NA
1679	chrII	581082	581140	+	NA	NA	NA	NA	NA	NA	1.22965	3.19919	NA	0.599778	1.31696	4.71419	1.14617	NA	NA	-5.71993	-13.8539	NA	-3.28734	-10.4468	-16.455	-14.098
1680	chrII	581662	581756	+	YBR175W	mRNA	SGD	inducible	NA	1.02151	NA	NA	0.971667	1.05561	NA	3.6006	0.585819	NA	-10.3301	NA	NA	-12.9159	-4.51143	NA	-9.56257	-7.14203
1681	chrII	582229	582236	+	YBR175W	mRNA	SGD	inducible	NA	NA	NA	NA	NA	NA	NA	0.334077	NA	NA	NA	NA	NA	NA	NA	NA	-2.57798	NA
1682	chrII	582364	582460	+	YBR175W	mRNA	SGD	constitutive	8.46695	8.17206	5.94994	7.78311	7.29996	10.1962	7.60076	17.1121	11.9966	-19.8569	-21.6876	-16.9989	-7.73613	-16.173	-10.7313	-16.8486	-12.243	-20.8131
1683	chrII	582517	582592	+	NA	NA	NA	NA	0.531327	NA	NA	NA	NA	NA	NA	0.259837	NA	-3.78159	NA	NA	NA	NA	NA	NA	-4.25809	NA
1684	chrII	582730	582797	+	NA	NA	NA	NA	0.257094	NA	NA	0.26262	0.298975	0.335876	0.225765	1.18783	0.305645	-9.41968	NA	NA	-3.67835	-2.53292	-8.8596	-3	-9.67251	-8.93129
1685	chrII	583595	583699	+	YBR176W	mRNA	SGD	constitutive	8.00418	6.6398	5.51361	3.36631	3.46312	4.82221	6.09566	5.15963	5.98554	-21.6959	-22.7858	-19.4505	-19.3393	-17.4335	-16.773	-19.963	-17.0802	-13.5629
1686	chrII	583785	583888	+	NA	NA	NA	NA	NA	NA	NA	2.19646	0.647778	1.65539	1.27934	2.85821	0.280174	NA	NA	NA	-6.38594	-10.669	-2.10413	-3.01631	-11.383	-10.2603
1687	chrII	584824	584866	+	NA	NA	NA	NA	NA	NA	NA	0.310369	NA	0.935653	NA	NA	NA	NA	NA	NA	-0.995727	NA	-13.7049	NA	NA	NA
1688	chrII	585956	585985	+	YBR178W	mRNA	SGD	inducible	NA	NA	NA	NA	NA	NA	NA	1.29919	NA	NA	NA	NA	NA	NA	NA	NA	-9.66484	NA
1689	chrII	586538	586557	+	NA	NA	NA	NA	NA	0.698927	NA	NA	NA	NA	0.451531	0.742393	0.229234	NA	-1.95125	NA	NA	NA	NA	-1.62256	-2.38258	-2.30121
1690	chrII	586614	586629	+	NA	NA	NA	NA	NA	NA	NA	NA	NA	NA	0.30102	NA	NA	NA	NA	NA	NA	NA	NA	-3.90689	NA	NA
1691	chrII	589393	589411	+	YBR180W	mRNA	SGD	inducible	0.325652	0.268818	0.237997	1.02661	0.398633	NA	NA	NA	NA	-3.83634	-3.90689	-2.80735	-8.98214	-6.17068	NA	NA	NA	NA
1692	chrII	592704	592711	+	NA	NA	NA	NA	NA	NA	NA	NA	NA	NA	NA	0.259837	NA	NA	NA	NA	NA	NA	NA	NA	-2.76589	NA
1693	chrII	593203	593267	+	2F-225	XUT	Van_Dijk_2011	NA	0.205675	0.322581	NA	1.1221	0.573035	NA	NA	1.00223	1.32446	-3.16993	-9.31781	NA	-9.83425	-9.13048	NA	NA	-3.61487	-15.0413
1694	chrII	595270	595285	+	YBR183W	mRNA	SGD	inducible	NA	NA	NA	NA	NA	NA	NA	0.779512	NA	NA	NA	NA	NA	NA	NA	NA	-3.9005	NA
1695	chrII	595881	595910	+	YBR183W	mRNA	SGD	inducible	NA	0.564518	NA	0.358118	0.54812	NA	NA	NA	NA	NA	-6.5637	NA	-7.36034	-6.72698	NA	NA	NA	NA
1696	chrII	595978	596234	+	YBR183W	mRNA	SGD	constitutive	86.6063	89.6239	51.6058	171.921	172.035	103.426	80.5606	109.874	210.64	-20.0028	-19.3062	-16.9694	-18.0445	-20.0678	-19.149	-20.8084	-22.0469	-20.9481
1697	chrII	596267	596388	+	NA	NA	NA	NA	0.942677	0.349463	0.356996	2.98432	1.61945	1.6074	1.0912	1.96734	4.9922	-13.5777	-9.20072	-7.27792	-14.8066	-14.9696	-16.9947	-13.3378	-19.7338	-18.3503
1698	chrII	596447	596533	+	NA	NA	NA	NA	0.462769	NA	NA	2.22033	0.573035	0.911662	0.714923	0.482555	1.75746	-14.4633	NA	NA	-16.4221	-14.1142	-13.8099	-14.5221	-9.11026	-13.4938
1699	chrII	596628	596651	+	NA	NA	NA	NA	NA	NA	NA	NA	0.298975	NA	0.225765	0.334077	0.305645	NA	NA	NA	NA	-4.23492	NA	-2.58496	-4.44955	-4.23492
1700	chrII	596716	596719	+	NA	NA	NA	NA	NA	NA	NA	NA	NA	NA	NA	NA	0.407526	NA	NA	NA	NA	NA	NA	NA	NA	-1.51274
1701	chrII	597190	597267	+	YBR184W	mRNA	SGD	inducible	NA	NA	NA	0.668488	NA	0.671751	NA	2.30142	NA	NA	NA	NA	-9.00987	NA	-11.2159	NA	-11.1354	NA
1702	chrII	597333	597383	+	YBR184W	mRNA	SGD	inducible	NA	2.82259	2.77664	0.549115	1.1959	1.96727	0.413903	NA	1.19711	NA	-10.0543	-10.8768	-7.49798	-11.7243	-8.34628	-6.96398	NA	-11.6434
1703	chrII	597691	597694	+	NA	NA	NA	NA	NA	NA	NA	NA	NA	NA	NA	0.259837	NA	NA	NA	NA	NA	NA	NA	NA	-1.56155	NA
1704	chrII	598027	598057	+	NA	NA	NA	NA	NA	NA	NA	0.26262	NA	NA	NA	0.371196	NA	NA	NA	NA	-3.56356	NA	NA	NA	-7.20275	NA
1705	chrII	598567	598667	+	NA	NA	NA	NA	0.565606	0.241936	0.237997	2.57845	0.323889	NA	NA	1.07647	NA	-13.2768	-3.87203	-8.43506	-18.021	-1.92247	NA	NA	-13.2915	NA
1706	chrII	600139	600169	+	YBR186W	mRNA	SGD	inducible	NA	0.376345	NA	NA	NA	NA	NA	0.222718	0.560349	NA	-7.63834	NA	NA	NA	NA	NA	-2	-5.5618
1707	chrII	600456	600555	+	YBR186W	mRNA	SGD	constitutive	0.308512	1.4785	2.26098	5.72989	2.96483	3.47871	0.338648	9.27991	5.6799	-3.05606	-16.9022	-16.7938	-21.232	-19.9205	-18.91	-8.89822	-20.4856	-18.693
1708	chrII	601670	601690	+	NA	NA	NA	NA	NA	NA	NA	NA	NA	NA	NA	0.334077	NA	NA	NA	NA	NA	NA	NA	NA	-6.85009	NA
1709	chrII	602483	602633	+	YBR187W	mRNA	SGD	constitutive	26.6692	49.8657	10.1546	6.44613	13.2296	12.1635	13.433	7.42393	18.5679	-20.5436	-22.0146	-21.9859	-17.0073	-17.4144	-22.6522	-26.4791	-16.651	-18.3511
1710	chrII	603003	603058	+	NA	NA	NA	NA	0.359931	1.45162	NA	NA	NA	NA	NA	NA	0.66223	-6.85615	-15.7562	NA	NA	NA	NA	NA	NA	-11.6308
1712	chrII	604411	604581	+	YBR189W	mRNA	SGD	constitutive	1259.33	1079.2	389.522	59.2089	238.059	334.46	535.214	129.548	582.508	-14.5974	-15.1214	-14.6919	-14.374	-14.4333	-14.3905	-14.6582	-14.4123	-16.2573
1713	chrII	604633	604649	+	NA	NA	NA	NA	NA	NA	NA	NA	NA	NA	NA	0.222718	NA	NA	NA	NA	NA	NA	NA	NA	-4	NA
1714	chrII	604797	604816	+	NA	NA	NA	NA	0.291373	NA	NA	NA	NA	NA	NA	NA	0.738641	-1.54917	NA	NA	NA	NA	NA	NA	NA	-3.25904
1715	chrII	604928	605300	+	NA	NA	NA	NA	196.454	84.3819	45.5765	4.63166	20.4299	43.3999	68.896	8.53751	81.2506	-31.9936	-33.2727	-28.6485	-19.277	-28.9781	-28.5233	-33.1888	-25.945	-32.3202
1716	chrII	606009	606140	+	YBR191W	mRNA	SGD	inducible	NA	NA	NA	NA	NA	NA	NA	NA	2.47063	NA	NA	NA	NA	NA	NA	NA	NA	-19.6135
1717	chrII	606169	606282	+	YBR191W	mRNA	SGD	constitutive	2120.54	1706.72	717.721	168.005	383.584	729.21	1105.12	291.835	898.748	-4.59163	-4.13621	-4.27726	-3.86798	-4.68328	-3.7654	-2.19996	-4.6649	-10.6302
1718	chrII	606299	606322	+	NA	NA	NA	NA	0.599885	0.510754	NA	NA	NA	NA	NA	NA	0.789582	-8.88455	-4.40237	NA	NA	NA	NA	NA	NA	-10.2041
1719	chrII	606670	606902	+	YBR191W-A	mRNA	SGD	constitutive	51.1102	21.8818	14.2402	2.19646	4.48462	18.2812	32.0587	3.74908	19.5867	-31.0124	-29.7365	-28.7813	-24.0442	-25.709	-28.137	-31.1314	-22.9388	-27.0785
1720	chrII	607436	607552	+	YBR192W	mRNA	SGD	constitutive	11.3293	12.5538	11.3842	6.7565	9.7665	12.8832	13.1696	18.0401	17.5746	-18.6863	-19.1716	-19.6957	-16.4356	-16.577	-19.8976	-19.4202	-19.6188	-22.7594
1721	chrII	607639	607862	+	NA	NA	NA	NA	1.16549	0.725808	1.86431	2.50683	0.647778	2.92692	1.88138	9.42839	3.41303	-10.089	-0.950956	-12.1839	-24.8092	-10.0175	-23.6821	-24.6465	-30.4697	-24.0227
1722	chrII	608085	608098	+	NA	NA	NA	NA	0.80556	0.672045	1.34865	0.572989	NA	1.22355	NA	1.81886	2.21592	-0.784992	-0.855451	-0.873981	-0.738285	NA	-0.577004	NA	-1.31959	-0.797327
1723	chrII	608213	608220	+	NA	NA	NA	NA	0.205675	NA	0.237997	NA	NA	0.311884	NA	NA	0.331115	-2.80735	NA	-2.80735	NA	NA	-2.69853	NA	NA	-2.79536
1724	chrII	608336	608367	+	NA	NA	NA	NA	0.582746	0.967744	0.793325	NA	0.523206	0.743724	0.827806	1.74462	1.32446	-0.733538	-8.62937	-5.31041	NA	-7.21079	-5.54403	-6.34075	-6.63977	-6.26175
1725	chrII	608431	608518	+	NA	NA	NA	NA	NA	NA	0.674326	NA	NA	NA	NA	0.482555	1.1207	NA	NA	-12.5255	NA	NA	NA	NA	-8.44392	-10.2868
1726	chrII	609380	609385	+	YBR194W	mRNA	SGD	inducible	NA	0.241936	NA	NA	NA	NA	NA	NA	NA	NA	-2.30121	NA	NA	NA	NA	NA	NA	NA
1727	chrII	609887	610120	+	YBR194W	mRNA	SGD	constitutive	28.7088	18.9517	28.9167	39.2259	17.1412	18.2093	22.2755	27.5056	22.796	-26.1741	-26.5725	-26.9702	-22.4668	-24.0146	-22.0746	-25.4867	-22.3392	-26.5414
1728	chrII	610239	610302	+	NA	NA	NA	NA	NA	NA	NA	0.286495	NA	NA	NA	0.334077	0.203763	NA	NA	NA	-2.53292	NA	NA	NA	-3.42856	-9.07854
1729	chrII	611049	611055	+	NA	NA	NA	NA	NA	NA	NA	NA	NA	NA	NA	0.259837	NA	NA	NA	NA	NA	NA	NA	NA	-2.54678	NA
1730	chrII	611657	611680	+	2F-240	XUT	Van_Dijk_2011	NA	NA	NA	NA	NA	NA	NA	NA	0.445436	NA	NA	NA	NA	NA	NA	NA	NA	-6.78534	NA
1731	chrII	614216	614246	+	2F-242	XUT	Van_Dijk_2011	NA	0.531327	NA	0.436329	NA	NA	1.03162	NA	3.74908	NA	-1.64762	NA	-1.6907	NA	NA	0	NA	-1.80936	NA
1732	chrII	614379	614463	+	CUT030	CUT	Xu_2009	NA	2.2967	3.17205	0.674326	3.03207	0.921838	1.51144	1.39222	1.18783	3.15833	-16.0953	-16.8369	-11.1823	-19.9755	-13.3433	-15.0158	-18.2691	-12.7656	-18.4984
1733	chrII	614537	614553	+	CUT030	CUT	Xu_2009	NA	NA	NA	NA	NA	0.54812	NA	0.451531	NA	NA	NA	NA	NA	NA	-2.31968	NA	-2.57169	NA	NA
1734	chrII	615396	615461	+	2F-242	XUT	Van_Dijk_2011	NA	2.74233	5.48388	2.02298	7.95023	4.16073	2.95091	3.12309	6.12474	5.88366	-7.58387	-10.6033	-9.80783	-9.16823	-4.13462	-3.90044	-10.3069	-7.43799	-7.12345
1735	chrII	615573	615681	+	2F-242	XUT	Van_Dijk_2011	NA	0.291373	1.34409	1.03132	6.01639	NA	1.05561	1.88138	2.56125	0.382056	-8.70859	-9.33553	-4.66115	-12.3055	NA	-4.81821	-4.64813	-11.7315	-1.45546
1736	chrII	615758	615768	+	2F-242	XUT	Van_Dijk_2011	NA	NA	0.645163	NA	1.19373	NA	NA	NA	0.482555	NA	NA	-1.71424	NA	-4.05529	NA	NA	NA	-2.06766	NA
1737	chrII	618789	618935	+	YBR199W	mRNA	SGD	constitutive	165.654	192.044	154.738	197.92	225.576	190.01	147.425	204.678	220.421	-14.3551	-12.862	-18.3471	-18.8336	-12.8334	-19.0652	-18.5858	-21.0527	-14.5415
1738	chrII	618976	619074	+	NA	NA	NA	NA	0.222814	NA	0.277664	0.286495	NA	0.287893	NA	1.00223	0.916934	-9.62605	NA	-12.1005	-12.8238	NA	-9.17102	NA	-18.0584	-16.6879
1739	chrII	619125	619150	+	NA	NA	NA	NA	2.57094	1.50538	2.10231	3.05594	2.64094	3.21481	2.63393	2.59837	4.43185	-1.38365	-1.36801	-1.43471	-1.56827	-1.57844	-1.56862	-1.51274	-1.58471	-1.57116
1740	chrII	619226	619577	+	NA	NA	NA	NA	18.2536	5.94088	14.1212	12.0567	14.0269	18.977	11.7022	17.5947	28.0684	-33.4887	-30.7061	-35.5725	-32.7257	-32.7479	-35.4802	-34.4306	-36.9115	-36.3676
1741	chrII	619590	619642	+	NA	NA	NA	NA	4.06208	2.84947	3.68896	2.29196	3.18906	4.15046	2.1824	5.56794	6.41854	-1.5641	-1.49412	-1.47244	-1.48817	-1.49276	-1.4915	-1.5836	-1.47494	-1.52703
1742	chrII	619675	619715	+	NA	NA	NA	NA	0.754141	NA	0.63466	NA	0.523206	0.815698	0.413903	0.96511	0.764112	-7.76562	NA	-5.3489	NA	-6.35095	-7.7574	-1.49884	-14.598	-8.16281
1743	chrII	619767	619932	+	NA	NA	NA	NA	2.03961	0.322581	2.02298	0.763986	2.29214	2.11122	1.5051	2.19006	3.89697	-19.1243	-13.1391	-17.8794	-15.5084	-19.7325	-19.3334	-19.4352	-17.3172	-21.0042
1744	chrII	620030	620059	+	NA	NA	NA	NA	0.78842	NA	NA	NA	0.473376	0.527804	1.01594	0.519675	0.942405	-2.37279	NA	NA	NA	-1.79949	-1.95204	-9.90478	-9.33145	-8.95281
1745	chrII	620123	620131	+	NA	NA	NA	NA	0.462769	NA	NA	NA	NA	NA	NA	NA	0.63676	-2.31783	NA	NA	NA	NA	NA	NA	NA	-0.904381
1746	chrII	620748	620878	+	YBR200W	mRNA	SGD	constitutive	54.2982	49.8388	78.4995	79.6455	95.622	77.6112	77.4751	108.055	70.2473	-7.7482	-4.55842	-10.44	-10.8913	-5.96945	-10.8505	-7.03787	-10.4908	-4.61384
1747	chrII	620904	620922	+	NA	NA	NA	NA	0.428489	0.215054	0.872657	0.978857	0.573035	0.887671	0.564413	1.15071	0.534878	-6.32915	-1	-8.07406	-4.98949	-4.87529	-4.48277	-4.96282	-5.89247	-4.993
1748	chrII	621000	621092	+	NA	NA	NA	NA	NA	NA	0.674326	NA	NA	0.527804	NA	0.631034	0.254704	NA	NA	-10.6691	NA	NA	-10.8863	NA	-14.3349	-12.844
1749	chrII	621229	621231	+	NA	NA	NA	NA	NA	NA	NA	0.501366	0.448462	NA	NA	0.445436	0.63676	NA	NA	NA	-0.985228	-0.852405	NA	NA	-0.979869	-0.63431
1750	chrII	621407	621412	+	NA	NA	NA	NA	0.514187	NA	0.356996	0.334244	NA	NA	0.451531	NA	0.331115	-3.60454	NA	-1.45546	-2.18328	NA	NA	-1.88373	NA	-1.52352
1751	chrII	621478	621502	+	NA	NA	NA	NA	NA	NA	0.63466	NA	0.448462	0.551795	0.451531	0.296957	0.509408	NA	NA	-8.94406	NA	-7.10897	-6.26136	-6.35431	-4	-6.94553
1752	chrII	621801	621808	+	NA	NA	NA	NA	NA	NA	NA	NA	NA	NA	NA	0.222718	NA	NA	NA	NA	NA	NA	NA	NA	-2.80735	NA
1753	chrII	621892	621918	+	NA	NA	NA	NA	NA	NA	1.03132	NA	NA	0.599778	NA	0.482555	NA	NA	NA	-8.99068	NA	NA	-9.03391	NA	-6.36429	NA
1754	chrII	621985	622051	+	NA	NA	NA	NA	NA	NA	0.912323	NA	0.971667	NA	NA	NA	0.66223	NA	NA	-11.0094	NA	-13.1395	NA	NA	NA	-6.49858
1755	chrII	623400	623494	+	YBR201W	mRNA	SGD	constitutive	13.2146	10.2957	8.56791	9.2872	10.6634	8.42088	14.2985	10.6905	11.589	-16.641	-13.7973	-14.0873	-15.7528	-14.4221	-14.0144	-13.6633	-15.176	-15.8087
1756	chrII	623687	623693	+	NA	NA	NA	NA	0.291373	NA	NA	NA	NA	NA	0.263393	0.259837	NA	-0.936667	NA	NA	NA	NA	NA	-2.54678	-1.97046	NA
1757	chrII	624291	624308	+	NA	NA	NA	NA	NA	NA	NA	NA	NA	NA	NA	0.371196	NA	NA	NA	NA	NA	NA	NA	NA	-6.4212	NA
1758	chrII	624857	624873	+	YBR202W	mRNA	SGD	inducible	NA	NA	NA	0.907233	NA	0.623769	NA	0.816632	NA	NA	NA	NA	-3.08546	NA	-2.68904	NA	-5.17091	NA
1759	chrII	625253	625276	+	YBR202W	mRNA	SGD	inducible	NA	NA	NA	0.238746	NA	NA	NA	0.222718	NA	NA	NA	NA	-3.32193	NA	NA	NA	-1.58496	NA
1760	chrII	625620	625783	+	YBR202W	mRNA	SGD	constitutive	11.6721	15.2689	29.4323	28.172	13.4788	30.1568	23.6301	33.2221	19.383	-23.0441	-23.0351	-22.8724	-21.7672	-21.4938	-19.7742	-20.5313	-21.4026	-25.3442
1761	chrII	625891	625898	+	NA	NA	NA	NA	NA	0.349463	0.594994	1.24148	NA	0.623769	NA	0.816632	NA	NA	-2.79536	-2.79835	-2.35919	NA	-2.18791	NA	-2.53334	NA
1762	chrII	625951	625991	+	NA	NA	NA	NA	NA	NA	0.515661	NA	NA	NA	0.225765	NA	0.331115	NA	NA	-2.96726	NA	NA	NA	-7.98289	NA	-3.79109
1763	chrII	627302	627306	+	NA	NA	NA	NA	NA	NA	NA	NA	NA	NA	0.30102	0.222718	NA	NA	NA	NA	NA	NA	NA	-2	-2	NA
1764	chrII	627424	627425	+	NA	NA	NA	NA	NA	NA	1.18999	NA	NA	NA	NA	NA	NA	NA	NA	0	NA	NA	NA	NA	NA	NA
1765	chrII	628089	628091	+	NA	NA	NA	NA	NA	NA	NA	NA	NA	NA	NA	NA	0.280174	NA	NA	NA	NA	NA	NA	NA	NA	-0.99403
1766	chrII	628920	628989	+	YBR203W	mRNA	SGD	constitutive	2.17673	4.00539	3.37163	36.1938	2.96483	11.5397	5.07972	12.4722	4.58467	-14.7635	-14.4412	-12.255	-15.1647	-15.2253	-14.788	-15.9185	-16.0938	-12.2811
1767	chrII	629051	629198	+	YBR203W	mRNA	SGD	constitutive	2.4681	3.87098	7.37792	17.3807	10.0406	15.7142	7.11161	12.5093	2.9291	-19.7521	-19.7439	-25.6598	-27.7069	-19.0444	-20.8027	-23.1471	-26.3766	-20.2801
1768	chrII	629225	629336	+	NA	NA	NA	NA	NA	0.779572	0.832991	1.26535	0.348804	14.0108	0.827806	1.07647	NA	NA	-2.30985	-0.791858	-8.59223	-2.58496	-9.15568	-14.2822	-10.3707	NA
1769	chrII	629637	629754	+	NA	NA	NA	NA	NA	NA	0.237997	2.9127	NA	3.45472	0.225765	2.00446	NA	NA	NA	-8.01987	-20.155	NA	-18.7933	-1	-18.8269	NA
1771	chrII	629889	630336	+	NA	NA	NA	NA	9.10111	7.41937	11.8602	70.8119	NA	54.028	3.16071	42.5391	12.2003	-25.0839	-26.332	-24.7034	-28.8219	NA	-27.6685	-20.6395	-28.1266	-23.8597
1772	chrII	630421	630425	+	NA	NA	NA	NA	NA	NA	NA	NA	NA	0.503813	NA	NA	NA	NA	NA	NA	NA	NA	-1.99673	NA	NA	NA
1773	chrII	630680	630689	+	NA	NA	NA	NA	NA	NA	NA	0.453617	0.423547	1.17556	NA	1.41055	NA	NA	NA	NA	-0.998001	-0.936667	-0.975526	NA	-0.863121	NA
1774	chrII	631252	631266	+	NA	NA	NA	NA	NA	0.322581	NA	NA	NA	0.335876	NA	NA	NA	NA	-3.49628	NA	NA	NA	-3.75111	NA	NA	NA
1775	chrII	631625	631647	+	NA	NA	NA	NA	0.359931	0.860217	0.594994	0.716237	0.323889	1.46346	NA	0.853751	0.585819	-5.99702	-2.20694	-5.79339	-6.1205	-1.99145	-7.03028	NA	-5.63938	-5.6899
1777	chrII	633528	633782	+	YBR205W	mRNA	SGD	constitutive	103.763	102.903	126.853	89.4102	58.7485	118.084	107.276	89.4954	65.841	-13.2908	-13.884	-9.71066	-9.68406	-12.2272	-9.30299	-12.0984	-10.5735	-9.5344
1778	chrII	633868	633887	+	NA	NA	NA	NA	1.02837	0.537636	0.912323	0.620739	0.423547	0.935653	0.978316	0.705273	0.483937	-1.57868	-6.46504	-4.95304	-1.57819	-1.54917	-6.75189	-4.6164	-4.85612	-1.50485
1779	chrII	634206	634258	+	YBR206W	mRNA	SGD	inducible	1.02837	0.2957	0.95199	0.405868	NA	1.03162	1.01594	0.593914	0.382056	-4.23492	-4.29613	-6.08006	-4.22433	NA	-5.93757	-9.25843	-10.6053	-4.19638
1780	chrII	634598	634612	+	YBR206W	mRNA	SGD	constitutive	6.18739	2.63442	4.40295	1.81447	2.01808	3.81459	4.06378	2.56125	3.54038	-2.48801	-2.30741	-2.48648	-2.3711	-2.46269	-2.48751	-2.5078	-4.54516	-2.5064
1781	chrII	635018	635304	+	YBR207W	mRNA	SGD	constitutive	9.11825	22.3925	13.5659	23.1106	9.56719	11.2038	11.1378	16.1842	20.631	-14.9989	-18.2326	-11.368	-13.3986	-16.4966	-12.2209	-19.7201	-18.3464	-19.5428
1782	chrII	635364	635435	+	NA	NA	NA	NA	1.50828	NA	2.97497	3.22307	0.697607	2.49508	2.10714	1.26207	3.10739	-8.33528	NA	-9.05662	-10.3312	-3.134	-8.05104	-3.55304	-4.70171	-10.1752
1783	chrII	635592	635597	+	NA	NA	NA	NA	NA	NA	0.356996	NA	NA	NA	NA	NA	NA	NA	NA	-2.30121	NA	NA	NA	NA	NA	NA
1784	chrII	635789	635794	+	NA	NA	NA	NA	NA	NA	NA	NA	NA	NA	NA	0.482555	NA	NA	NA	NA	NA	NA	NA	NA	-3.54381	NA
1785	chrII	636218	636256	+	NA	NA	NA	NA	NA	NA	0.31733	NA	NA	NA	0.376275	NA	0.815053	NA	NA	-2.21613	NA	NA	NA	-1.39681	NA	-11.7782
1786	chrII	641635	641646	+	YBR209W	mRNA	SGD	inducible	NA	NA	NA	0.238746	NA	NA	NA	NA	NA	NA	NA	NA	-3.45943	NA	NA	NA	NA	NA
1787	chrII	643196	643303	+	NA	NA	NA	NA	NA	0.215054	1.22965	14.0144	2.06791	0.287893	1.76849	1.22495	0.509408	NA	-3	-11.9728	-21.9857	-16.3401	-9.3204	-14.2333	-16.417	-12.0861
1788	chrII	644106	644111	+	NA	NA	NA	NA	NA	NA	NA	NA	NA	0.335876	NA	NA	NA	NA	NA	NA	NA	NA	-2.18328	NA	NA	NA
1789	chrII	644343	644362	+	2F-258	XUT	Van_Dijk_2011	NA	0.222814	NA	0.515661	NA	0.498291	0.43184	NA	NA	0.305645	-4.22978	NA	-6.48334	NA	-4.21723	-4.09534	NA	NA	-4.16241
1790	chrII	645312	645603	+	YBR210W	mRNA	SGD	constitutive	70.735	101.425	54.8584	62.8617	47.6366	49.9015	54.6352	57.7953	58.6074	-20.7175	-14.9063	-23.4217	-14.8264	-15.5459	-20.6539	-14.7508	-25.7371	-17.7883
1791	chrII	645627	645702	+	NA	NA	NA	NA	0.342792	0.430109	0.991656	0.501366	NA	0.791707	1.24171	1.29919	0.254704	-8.20352	-12.5561	-12.7074	-6.21505	NA	-12.4401	-12.4653	-15.4204	-2.80735
1792	chrII	647412	648048	+	YBR212W	mRNA	SGD	constitutive	54.281	66.1292	145.813	220.816	160.898	101.338	140.125	137.751	221.261	-21.6429	-22.979	-28.2255	-22.2649	-25.7191	-27.2275	-22.1363	-31.6826	-32.0871
1793	chrII	648124	648339	+	NA	NA	NA	NA	NA	0.860217	5.79127	1.5996	3.86176	3.14284	2.97258	5.41947	8.96558	NA	-6.77647	-14.8945	-11.7421	-17.6028	-17.5507	-18.0799	-20.0433	-15.8149
1794	chrII	648612	648673	+	NA	NA	NA	NA	NA	NA	NA	0.26262	NA	NA	0.376275	0.519675	0.891464	NA	NA	NA	-4.3661	NA	NA	-4.19638	-6.65621	-12.1789
1795	chrII	648780	648784	+	NA	NA	NA	NA	NA	NA	NA	NA	NA	0.335876	NA	0.334077	0.789582	NA	NA	NA	NA	NA	-1	NA	-0.991076	-2.54774
1796	chrII	649219	649222	+	NA	NA	NA	NA	NA	NA	1.07099	NA	1.07133	0.695742	NA	NA	1.65558	NA	NA	0	NA	0	-0.663197	NA	NA	-0.492916
1797	chrII	649314	649402	+	NA	NA	NA	NA	NA	NA	1.34865	NA	1.1959	0.959644	0.940689	1.07647	2.03763	NA	NA	-12.3075	NA	-10.7394	-13.8823	-9.4548	-12.6011	-13.6953
1798	chrII	649506	649663	+	NA	NA	NA	NA	0.291373	0.537636	2.41964	NA	0.27406	0.719733	0.489158	1.55902	3.15833	-0.977418	-14.275	-17.4383	NA	-14.5802	-16.1599	-14.4809	-14.4228	-19.3156
1799	chrII	649756	649788	+	NA	NA	NA	NA	NA	0.349463	NA	NA	NA	NA	NA	NA	0.993345	NA	-2.79536	NA	NA	NA	NA	NA	NA	-8.80654
1800	chrII	650218	650374	+	YBR213W	mRNA	SGD	constitutive	17.1739	13.5484	36.7706	25.498	34.2824	32.34	30.8922	32.1456	19.2811	-12.9814	-8.34808	-12.7918	-7.85711	-10.3706	-9.81496	-11.4835	-11.7456	-10.9025
1801	chrII	650431	650485	+	NA	NA	NA	NA	NA	NA	1.15032	0.334244	NA	0.935653	0.790178	NA	0.738641	NA	NA	-14.4847	-8.40475	NA	-11.015	-13.047	NA	-13.1884
1802	chrII	650542	650551	+	NA	NA	NA	NA	NA	NA	NA	NA	NA	NA	NA	0.296957	NA	NA	NA	NA	NA	NA	NA	NA	-3.16993	NA
1803	chrII	650673	650727	+	NA	NA	NA	NA	NA	NA	NA	0.310369	NA	NA	0.263393	NA	NA	NA	NA	NA	-3.44465	NA	NA	-3.40833	NA	NA
1805	chrII	651284	651730	+	YBR214W	mRNA	SGD	constitutive	65.079	107.124	546.323	972.65	508.929	442.732	238.559	476.876	464.911	-8.05627	-8.69539	-7.96252	-6.76858	-9.31585	-7.97045	-8.23002	-7.23741	-8.13897
1806	chrII	651768	652003	+	NA	NA	NA	NA	2.79375	0.806454	8.64724	28.8643	5.55594	13.7469	5.56888	12.1752	12.1748	-26.8863	-14.2537	-30.6752	-32.2334	-27.1287	-30.4071	-29.1332	-32.1452	-26.3585
1807	chrII	652027	652723	+	NA	NA	NA	NA	5.41611	9.0054	67.4326	43.5949	57.3782	42.9441	27.1295	47.1419	70.502	-31.4688	-32.3548	-46.8777	-39.6937	-44.3111	-44.7056	-41.0025	-47.4542	-46.2819
1808	chrII	652773	652779	+	NA	NA	NA	NA	NA	NA	0.515661	NA	NA	0.263902	NA	0.296957	0.509408	NA	NA	-3.94526	NA	NA	-0.99403	NA	-2.21613	-3.8399
1809	chrII	653235	653408	+	YBR215W	mRNA	SGD	constitutive	7.81565	8.97852	21.8164	17.3091	10.8129	12.0195	14.4114	8.57463	20.5037	-17.6621	-17.192	-19.8847	-23.6898	-18.8304	-20.2911	-19.2036	-22.2471	-19.3886
1810	chrII	653480	653517	+	NA	NA	NA	NA	0.222814	NA	0.832991	NA	NA	NA	NA	0.482555	0.916934	-0.995727	NA	-8.23549	NA	NA	NA	NA	-7.0051	-9.74924
1811	chrII	653625	653910	+	NA	NA	NA	NA	0.617025	0.376345	9.55956	19.3623	0.896924	1.53543	3.72513	22.6059	7.71753	-9.15803	-9.74341	-19.7477	-26.7582	-11.2245	-10.5442	-20.1113	-25.1241	-28.0853
1812	chrII	654273	654413	+	NA	NA	NA	NA	0.359931	NA	4.75995	1.16985	0.946753	1.36749	2.10714	2.19006	2.9291	-8.96289	NA	-21.0551	-17.5131	-11.5526	-17.895	-15.0505	-20.6721	-21.9905
1813	chrII	654558	654569	+	NA	NA	NA	NA	NA	NA	0.475995	NA	NA	NA	NA	NA	0.229234	NA	NA	-3.17678	NA	NA	NA	NA	NA	-3.42856
1814	chrII	654647	654704	+	NA	NA	NA	NA	NA	NA	0.872657	NA	NA	0.287893	NA	0.482555	0.687701	NA	NA	-10.7441	NA	NA	-1.55306	NA	-1.52352	-12.7426
1815	chrII	654841	654857	+	NA	NA	NA	NA	NA	NA	0.237997	NA	NA	NA	NA	NA	0.203763	NA	NA	-2.58496	NA	NA	NA	NA	NA	-3.32193
1816	chrII	657220	657233	+	YBR217W	mRNA	SGD	inducible	NA	NA	NA	NA	NA	NA	NA	0.445436	NA	NA	NA	NA	NA	NA	NA	NA	-3.62595	NA
1817	chrII	657722	657864	+	YBR217W	mRNA	SGD	constitutive	26.035	20.7527	30.543	43.8098	40.9595	33.3956	28.0325	78.4709	29.4947	-16.1435	-14.8994	-17.1177	-15.4033	-15.7873	-16.6064	-17.8336	-15.603	-16.1069
1818	chrII	658009	658014	+	NA	NA	NA	NA	NA	NA	NA	NA	NA	0.407849	0.413903	0.445436	NA	NA	NA	NA	NA	NA	-1.54917	-3.57457	-1.45546	NA
1819	chrII	658251	658255	+	NA	NA	NA	NA	NA	NA	NA	0.26262	NA	NA	NA	NA	NA	NA	NA	NA	-1.98806	NA	NA	NA	NA	NA
1820	chrII	661988	662112	+	2F-270	XUT	Van_Dijk_2011	NA	0.891258	NA	2.30064	8.69034	NA	1.91929	1.16645	2.82109	0.942405	-8.91485	NA	-5.38909	-10.5153	NA	-11.7052	-6.14371	-14.0275	-10.7348
1821	chrII	663069	663079	+	CUT033	CUT	Xu_2009	NA	NA	NA	NA	1.00273	NA	NA	NA	0.222718	NA	NA	NA	NA	0	NA	NA	NA	-3.32193	NA
1822	chrII	663357	663361	+	NA	NA	NA	NA	NA	NA	NA	0.477491	NA	NA	NA	NA	NA	NA	NA	NA	-1.86814	NA	NA	NA	NA	NA
1823	chrII	663873	663880	+	NA	NA	NA	NA	0.445629	NA	NA	NA	NA	NA	NA	NA	NA	-2.49993	NA	NA	NA	NA	NA	NA	NA	NA
1824	chrII	665176	665186	+	NA	NA	NA	NA	NA	NA	NA	NA	NA	NA	NA	0.593914	NA	NA	NA	NA	NA	NA	NA	NA	-2.31277	NA
1825	chrII	666088	666120	+	YBR221W-A	mRNA	SGD	inducible	NA	NA	NA	NA	NA	NA	NA	0.631034	NA	NA	NA	NA	NA	NA	NA	NA	-9.77124	NA
1826	chrII	666649	666718	+	NA	NA	NA	NA	NA	0.215054	NA	0.572989	0.498291	NA	NA	1.07647	0.407526	NA	-3.70044	NA	-4.30389	-4.10272	NA	NA	-6.20509	-7.25035
1828	chrII	670408	670800	+	YBR225W	mRNA	SGD	constitutive	39.3525	30.5915	51.8834	98.1961	58.599	53.5482	49.2921	69.2281	74.4245	-26.4014	-14.245	-24.8075	-19.9878	-22.6436	-22.0933	-23.0402	-27.683	-21.7664
1829	chrII	671058	671079	+	NA	NA	NA	NA	NA	NA	0.396662	0.477491	NA	NA	NA	0.593914	NA	NA	NA	-2.50987	-6.23549	NA	NA	NA	-8.68456	NA
1830	chrII	671150	671220	+	NA	NA	NA	NA	1.67968	NA	1.07099	1.36085	0.896924	0.671751	1.20408	1.81886	2.13951	-11.1008	NA	-12.4374	-7.62055	-9.47583	-9.20107	-11.4117	-12.4878	-11.1164
1831	chrII	671519	671605	+	NA	NA	NA	NA	2.58808	0.430109	2.73697	1.05048	2.44163	2.66301	1.58036	3.00669	2.9291	-14.1574	-0.954434	-15.3133	-0.99403	-14.3061	-16.1146	-11.6923	-14.4631	-13.6841
1832	chrII	671661	671666	+	NA	NA	NA	NA	0.445629	NA	0.753658	NA	0.348804	0.479822	0.526786	0.927991	0.331115	-3.08604	NA	-4.40428	NA	-1.58496	-1.58496	-1.18808	-1.53892	-1.52352
1833	chrII	672026	672035	+	NA	NA	NA	NA	NA	NA	NA	NA	NA	NA	NA	0.296957	0.254704	NA	NA	NA	NA	NA	NA	NA	-2.46718	-3.07784
1834	chrII	672155	672182	+	NA	NA	NA	NA	0.80556	NA	1.38832	1.2176	1.24573	NA	0.752551	1.63326	0.738641	-2.78533	NA	-6.39948	-4.25167	-3.15527	NA	-2.96093	-6.32807	-3.16721
1835	chrII	672235	672242	+	NA	NA	NA	NA	NA	NA	0.674326	0.286495	NA	NA	NA	NA	0.382056	NA	NA	-1.24757	-2.27518	NA	NA	NA	NA	-1.32604
1836	chrII	674975	674998	+	YBR228W	mRNA	SGD	constitutive	1.7311	2.12366	1.58665	6.06414	4.26039	1.72736	1.5051	5.45659	2.98004	-7.60991	-5.59369	-9.48079	-10.6771	-7.56447	-9.33207	-7.51873	-10.0662	-9.46001
1837	chrII	675292	675503	+	YBR228W	mRNA	SGD	constitutive	13.0089	8.97852	15.7872	21.6542	18.5613	13.9148	15.3897	26.4663	13.7285	-19.0848	-19.1398	-18.9444	-18.251	-21.0516	-17.8816	-20.6812	-17.3333	-19.6233
1838	chrII	675556	675887	+	NA	NA	NA	NA	3.3765	3.68281	3.92696	4.89428	3.86176	3.79059	3.53699	8.76023	7.02983	-20.2522	-25.9925	-23.3899	-23.3717	-22.4398	-24.5915	-24.4547	-27.3144	-27.6959
1839	chrII	675953	675957	+	NA	NA	NA	NA	0.445629	0.564518	0.277664	0.477491	0.348804	NA	NA	0.296957	0.483937	-0.961237	-2.92144	-0.985228	-0.811278	-0.940286	NA	NA	-0.954434	-0.949452
1840	chrII	679429	679445	+	YBR230W-A	mRNA	SGD	inducible	NA	0.45699	NA	NA	NA	NA	NA	NA	NA	NA	-3.14851	NA	NA	NA	NA	NA	NA	NA
1841	chrII	679571	679598	+	YBR230W-A	mRNA	SGD	inducible	NA	NA	NA	NA	0.82218	0.815698	NA	0.334077	NA	NA	NA	NA	NA	-5.65282	-9.19027	NA	-3.9643	NA
1842	chrII	680214	680220	+	YBR230W-A	mRNA	SGD	inducible	NA	NA	NA	0.429742	NA	NA	NA	NA	NA	NA	NA	NA	-2.37376	NA	NA	NA	NA	NA
1843	chrII	680270	680438	+	YBR230W-A	mRNA	SGD	constitutive	113.978	45.7528	129.153	222.702	114.358	129.384	95.2729	207.128	47.5532	-24.9	-28.0203	-26.0948	-29.8472	-30.0864	-24.644	-28.6634	-24.3001	-28.1408
1844	chrII	683269	683565	+	YBR233W	mRNA	SGD	constitutive	4.90192	5.69894	21.9354	12.1999	6.00441	9.95631	8.95536	19.0053	15.486	-23.9774	-21.5035	-24.2581	-23.9351	-21.8004	-21.6365	-21.1182	-16.2597	-26.2359
1845	chrII	683684	683687	+	NA	NA	NA	NA	NA	NA	0.237997	NA	NA	NA	NA	NA	NA	NA	NA	-1.58496	NA	NA	NA	NA	NA	NA
1846	chrII	683778	683780	+	NA	NA	NA	NA	NA	NA	NA	NA	NA	NA	NA	NA	0.407526	NA	NA	NA	NA	NA	NA	NA	NA	-0.811278
1847	chrII	684029	684053	+	NA	NA	NA	NA	NA	NA	0.475995	NA	NA	0.239911	NA	0.668153	0.66223	NA	NA	-0.979869	NA	NA	-3	NA	-0.918296	-5.76144
1848	chrII	684475	684572	+	YBR233W-A	mRNA	SGD	inducible	NA	NA	1.07099	NA	NA	NA	NA	NA	0.942405	NA	NA	-3.16318	NA	NA	NA	NA	NA	-12.6115
1849	chrII	684863	685025	+	YBR233W-A	mRNA	SGD	constitutive	44.6829	57.0969	24.7914	15.4946	31.4671	33.5876	38.9445	32.6282	30.6664	-13.938	-14.2702	-14.241	-13.8421	-14.216	-15.7025	-14.5948	-20.2136	-13.8014
1850	chrII	685117	685161	+	NA	NA	NA	NA	1.31975	1.04839	NA	NA	NA	NA	0.451531	0.259837	NA	-3.17451	-10.9948	NA	NA	NA	NA	-9.90839	-3.27286	NA
1851	chrII	686788	686948	+	YBR235W	mRNA	SGD	constitutive	42.4376	64.9195	29.4323	41.9476	36.2756	30.1328	32.5855	27.9511	39.1735	-13.904	-12.8817	-16.957	-18.1748	-14.5862	-16.4587	-15.2658	-23.785	-16.6299
1852	chrII	686989	687121	+	NA	NA	NA	NA	1.23405	1.39785	3.64929	14.6829	2.21739	5.51795	2.52105	14.9221	1.91028	-0.967295	-13.9224	-22.2333	-18.7345	-20.4267	-20.6423	-19.0906	-19.51	-17.1957
1853	chrII	687174	687179	+	NA	NA	NA	NA	NA	NA	NA	NA	NA	NA	NA	0.334077	NA	NA	NA	NA	NA	NA	NA	NA	-2.30121	NA
1854	chrII	687262	687287	+	NA	NA	NA	NA	NA	0.268818	NA	0.811735	NA	NA	0.489158	0.334077	NA	NA	-2.58496	NA	-8.09368	NA	NA	-8.59101	-4.21002	NA
1855	chrII	688090	688114	+	NA	NA	NA	NA	NA	NA	0.31733	NA	NA	NA	NA	0.445436	NA	NA	NA	-1.51274	NA	NA	NA	NA	-6.87744	NA
1856	chrII	688777	688786	+	NA	NA	NA	NA	NA	NA	NA	NA	NA	NA	NA	NA	0.407526	NA	NA	NA	NA	NA	NA	NA	NA	-4.75489
1857	chrII	689134	689166	+	NA	NA	NA	NA	NA	0.483872	NA	NA	NA	NA	NA	NA	NA	NA	-7.65247	NA	NA	NA	NA	NA	NA	NA
1858	chrII	691908	692029	+	YBR237W	mRNA	SGD	constitutive	36.6787	28.871	50.5745	79.5739	46.7646	71.7094	44.8144	84.2987	53.6661	-16.0735	-15.141	-18.4612	-15.846	-14.3776	-19.4865	-15.6951	-16.2082	-16.7447
1859	chrII	692165	692336	+	NA	NA	NA	NA	0.291373	NA	0.912323	0.644613	NA	1.24754	0.903061	1.63326	0.865993	-10.2902	NA	-15.9077	-18.1445	NA	-19.7122	-21.7864	-23.9912	-19.7617
1861	chrII	692447	692771	+	NA	NA	NA	NA	0.308512	NA	1.58665	1.2176	1.81876	1.17556	NA	3.11805	15.6388	-18.3999	NA	-25.8522	-23.8731	-26.2115	-24.699	NA	-29.637	-31.2985
1862	chrII	692958	692967	+	NA	NA	NA	NA	NA	NA	NA	NA	NA	0.791707	NA	NA	NA	NA	NA	NA	NA	NA	-1.94513	NA	NA	NA
1863	chrII	693877	693896	+	NA	NA	NA	NA	NA	NA	NA	NA	NA	NA	NA	NA	0.432997	NA	NA	NA	NA	NA	NA	NA	NA	-3.34366
1864	chrII	696941	696960	+	NA	NA	NA	NA	NA	NA	NA	NA	NA	NA	NA	0.371196	NA	NA	NA	NA	NA	NA	NA	NA	-3.74366	NA
1865	chrII	697814	697969	+	2F-282	XUT	Van_Dijk_2011	NA	3.65073	6.98927	2.10231	7.56824	3.73718	6.59755	5.64413	4.1574	1.27352	-19.7089	-21.1255	-17.063	-18.5986	-17.1365	-22.1109	-20.4313	-20.5237	-12.7264
1866	chrII	698031	698105	+	2F-282	XUT	Van_Dijk_2011	NA	NA	0.887099	0.356996	NA	NA	0.695742	0.752551	1.11359	NA	NA	-11.0493	-9.19392	NA	NA	-11.6813	-5.91069	-15.3266	NA
1867	chrII	698319	698333	+	SUT021	SUT	Xu_2009	NA	NA	NA	NA	NA	NA	0.287893	0.413903	0.96511	NA	NA	NA	NA	NA	NA	-3.73071	-3.60046	-3.79109	NA
1868	chrII	698782	698876	+	NA	NA	NA	NA	NA	NA	NA	2.55458	NA	NA	NA	0.334077	NA	NA	NA	NA	-22.7584	NA	NA	NA	-6.60055	NA
1869	chrII	698937	698981	+	NA	NA	NA	NA	NA	NA	NA	0.859484	NA	NA	NA	0.259837	NA	NA	NA	NA	-10.0425	NA	NA	NA	-7.35507	NA
1870	chrII	699117	699307	+	NA	NA	NA	NA	NA	NA	0.515661	4.58392	0.423547	NA	0.263393	1.44767	NA	NA	NA	-2.95815	-29.4919	-10.8323	NA	-8.18379	-17.3979	NA
1871	chrII	701068	701083	+	NA	NA	NA	NA	NA	NA	NA	NA	NA	NA	NA	0.408316	NA	NA	NA	NA	NA	NA	NA	NA	-3.69459	NA
1872	chrII	701957	701972	+	NA	NA	NA	NA	NA	NA	NA	NA	NA	NA	NA	0.259837	NA	NA	NA	NA	NA	NA	NA	NA	-3.84918	NA
1873	chrII	702059	702126	+	NA	NA	NA	NA	NA	NA	NA	NA	NA	NA	0.225765	1.63326	NA	NA	NA	NA	NA	NA	NA	-8.65299	-17.05	NA
1874	chrII	703457	703556	+	NA	NA	NA	NA	0.497048	NA	0.277664	3.70056	0.722522	0.839689	0.338648	3.63772	0.63676	-7.76872	NA	-12.586	-21.3717	-7.71709	-16.3262	-4.13271	-17.7646	-12.858
1875	chrII	703847	703852	+	YBR242W	mRNA	SGD	inducible	NA	NA	NA	NA	NA	NA	NA	NA	0.203763	NA	NA	NA	NA	NA	NA	NA	NA	-2.32193
1876	chrII	703946	704118	+	YBR242W	mRNA	SGD	inducible	1.21691	NA	0.991656	7.66373	1.44504	NA	1.24171	4.38012	0.382056	-17.4538	NA	-15.3345	-25.6882	-13.1587	NA	-16.6861	-24.7346	-13.6373
1877	chrII	704290	704314	+	YBR242W	mRNA	SGD	inducible	NA	0.268818	NA	NA	1.0215	NA	NA	NA	0.432997	NA	-2	NA	NA	-3.57795	NA	NA	NA	-6.73114
1878	chrII	704380	704584	+	YBR242W	mRNA	SGD	constitutive	37.9642	35.699	30.7017	32.6843	24.4412	32.9398	41.9923	45.7314	18.3896	-21.9485	-15.5609	-17.4508	-21.6248	-22.8748	-16.9943	-18.5669	-24.3109	-20.8019
1879	chrII	704638	704759	+	YBR242W	mRNA	SGD	constitutive	2.89659	0.645163	1.15032	2.05321	1.04641	2.59104	2.14477	1.85598	1.57916	-21.0791	-20.5017	-13.7518	-17.6177	-12.5262	-17.0775	-15.9958	-16.0096	-13.0795
1880	chrII	704953	704963	+	NA	NA	NA	NA	0.80556	NA	NA	0.286495	NA	0.287893	0.413903	NA	0.229234	-2.1539	NA	NA	-3.16993	NA	-1	-0.94566	NA	-0.991076
1881	chrII	705113	705123	+	NA	NA	NA	NA	NA	NA	NA	0.334244	NA	NA	NA	0.371196	NA	NA	NA	NA	-2	NA	NA	NA	-3.22543	NA
1882	chrII	707281	707393	+	YBR244W	mRNA	SGD	constitutive	5.03904	2.76882	1.26932	4.44067	6.35321	2.78297	2.63393	5.56794	4.73749	-19.2893	-16.5978	-12.2684	-23.304	-21.0545	-13.9955	-14.3474	-21.5573	-17.6454
1884	chrII	707428	707602	+	YBR244W	mRNA	SGD	constitutive	112.538	165.861	321.138	12.0805	11.4856	81.9536	1426.27	45.3973	39.9376	-12.3517	-12.5777	-9.52184	-13.1222	-10.2025	-9.33024	-10.2749	-8.91839	-13.1991
1886	chrII	707687	707840	+	NA	NA	NA	NA	10.7637	8.19895	16.5408	2.79332	3.26381	5.01414	93.2411	5.90202	7.59018	-7.14297	-11.7324	-10.7575	-16.9751	-14.2052	-5.07212	-5.51883	-20.6787	-17.1948
1887	chrII	711500	711604	+	YBR246W	mRNA	SGD	constitutive	18.4079	17.1237	37.8416	27.4319	10.7133	17.3216	21.7111	25.1671	42.4337	-11.2132	-14.7311	-10.9058	-14.4192	-12.5689	-14.4617	-12.82	-14.8474	-16.2927
1888	chrII	711689	711735	+	NA	NA	NA	NA	NA	NA	NA	NA	NA	NA	NA	NA	0.687701	NA	NA	NA	NA	NA	NA	NA	NA	-9.71111
1889	chrII	711847	711888	+	NA	NA	NA	NA	NA	NA	NA	NA	NA	NA	1.12883	NA	1.29899	NA	NA	NA	NA	NA	NA	-7.7253	NA	-7.77996
1890	chrII	712156	712185	+	NA	NA	NA	NA	NA	NA	NA	0.716237	NA	NA	NA	0.408316	NA	NA	NA	NA	-2.83724	NA	NA	NA	-7.39202	NA
1891	chrII	712323	712327	+	NA	NA	NA	NA	NA	NA	NA	NA	NA	NA	NA	NA	0.66223	NA	NA	NA	NA	NA	NA	NA	NA	-2.89049
1892	chrII	712433	712436	+	NA	NA	NA	NA	NA	NA	NA	NA	NA	NA	NA	NA	0.356586	NA	NA	NA	NA	NA	NA	NA	NA	-1.56155
1893	chrII	714666	714705	+	CUT037	CUT	Xu_2009	NA	NA	NA	NA	NA	NA	NA	NA	NA	1.09523	NA	NA	NA	NA	NA	NA	NA	NA	-11.0793
1894	chrII	714759	714772	+	CUT037	CUT	Xu_2009	NA	NA	NA	NA	NA	NA	NA	NA	0.371196	NA	NA	NA	NA	NA	NA	NA	NA	-3.59294	NA
1895	chrII	716754	716758	+	NA	NA	NA	NA	NA	NA	NA	NA	NA	NA	NA	NA	0.305645	NA	NA	NA	NA	NA	NA	NA	NA	-2
1896	chrII	716917	716934	+	NA	NA	NA	NA	NA	NA	NA	NA	NA	NA	NA	0.408316	NA	NA	NA	NA	NA	NA	NA	NA	-6.42804	NA
1897	chrII	718404	718483	+	YBR250W	mRNA	SGD	inducible	NA	NA	NA	NA	NA	NA	0.338648	NA	0.916934	NA	NA	NA	NA	NA	NA	-7.06803	NA	-18.1589
1898	chrII	719123	719250	+	YBR250W	mRNA	SGD	constitutive	3.78785	0.913981	4.16495	11.8179	2.54128	2.23117	0.413903	14.2911	3.69321	-12.8189	-14.5233	-16.6648	-21.6733	-15.6029	-17.9059	-13.9034	-22.9453	-19.617
1899	chrII	720886	720956	+	YBR251W	mRNA	SGD	inducible	NA	NA	NA	1.00273	NA	NA	NA	0.890871	NA	NA	NA	NA	-13.6676	NA	NA	NA	-16.539	NA
1900	chrII	721094	721105	+	YBR251W	mRNA	SGD	inducible	NA	NA	NA	NA	NA	NA	NA	0.296957	NA	NA	NA	NA	NA	NA	NA	NA	-3.45943	NA
1901	chrII	721294	721416	+	YBR251W	mRNA	SGD	constitutive	43.6031	52.5808	132.049	108.772	71.8785	90.8543	81.8775	110.505	48.8522	-16.6577	-16.027	-13.1861	-14.3307	-15.3024	-14.8635	-14.9367	-14.7616	-17.1403
1902	chrII	721543	721611	+	NA	NA	NA	NA	NA	NA	NA	NA	NA	0.383858	NA	0.334077	NA	NA	NA	NA	NA	NA	-3.41154	NA	-9.09913	NA
1903	chrII	721772	721802	+	NA	NA	NA	NA	NA	NA	0.277664	NA	0.423547	0.335876	0.752551	NA	0.254704	NA	NA	-3.40833	NA	-5.61281	-3.25285	-9.33669	NA	-3.35894
1904	chrII	721869	721941	+	NA	NA	NA	NA	0.634164	0.887099	1.30899	0.740111	NA	1.51144	1.12883	0.742393	1.09523	-11.4592	-11.0543	-8.64566	-11.2574	NA	-13.2408	-11.2514	-10.5477	-10.5427
1905	chrII	722554	722629	+	YBR252W	mRNA	SGD	constitutive	142.413	187.42	134.508	54.0998	115.579	110.335	163.266	105.049	79.4422	-8.10211	-7.67138	-7.52998	-13.4333	-9.5686	-7.5327	-6.82737	-9.62268	-10.197
1906	chrII	722744	722751	+	NA	NA	NA	NA	NA	NA	NA	NA	NA	NA	NA	0.296957	NA	NA	NA	NA	NA	NA	NA	NA	-2.67943	NA
1907	chrII	723100	723122	+	YBR253W	mRNA	SGD	inducible	NA	NA	NA	NA	NA	NA	NA	0.816632	NA	NA	NA	NA	NA	NA	NA	NA	-6.67584	NA
1908	chrII	723194	723375	+	YBR253W	mRNA	SGD	constitutive	100.489	100.457	58.6267	50.3992	114.731	75.1162	79.9962	97.2534	68.7191	-14.2412	-13.2968	-15.8505	-14.953	-13.1875	-20.3987	-17.2774	-16.5856	-14.6059
1909	chrII	724366	724556	+	YBR255W	mRNA	SGD	constitutive	40.3294	34.0055	66.6789	134.223	70.3587	65.1119	67.2028	136.006	62.0713	-22.0983	-20.4026	-21.3379	-22.0421	-23.0353	-21.1933	-21.4047	-23.0423	-21.2618
1910	chrII	724584	724672	+	NA	NA	NA	NA	1.21691	NA	1.34865	0.811735	0.946753	NA	2.1824	2.00446	2.47063	-13.6345	NA	-15.886	-8.24302	-15.7249	NA	-17.9053	-12.2053	-16.6626
1911	chrII	724755	724759	+	NA	NA	NA	NA	0.205675	NA	0.396662	NA	0.523206	0.263902	NA	0.556794	0.687701	-1	NA	-1.39681	NA	-0.791858	-0.99403	NA	-2.91313	-2.72078
1912	chrII	724835	724849	+	NA	NA	NA	NA	0.719862	NA	1.50732	1.05048	1.14607	0.959644	1.27934	2.22718	1.8084	-5.08357	NA	-4.58492	-5.14996	-4.48362	-3.9041	-2.15858	-5.80679	-7.07616
1913	chrII	724988	725008	+	NA	NA	NA	NA	NA	NA	NA	NA	NA	NA	NA	0.296957	NA	NA	NA	NA	NA	NA	NA	NA	-4.125	NA
1914	chrII	725106	725131	+	NA	NA	NA	NA	NA	NA	0.872657	NA	0.996582	NA	NA	1.55902	0.66223	NA	NA	-7.83157	NA	-4.92777	NA	NA	-6.65027	-0.981698
1915	chrII	725410	725563	+	NA	NA	NA	NA	0.959816	0.403227	3.0543	0.286495	2.24231	1.77534	0.903061	3.7862	2.7508	-17.3222	-12.4358	-22.4097	-12.5443	-17.1343	-15.6334	-14.1059	-20.1138	-18.6724
1916	chrII	725626	725628	+	NA	NA	NA	NA	NA	NA	0.277664	NA	NA	NA	NA	NA	NA	NA	NA	-0.985228	NA	NA	NA	NA	NA	NA
1917	chrII	725766	725817	+	NA	NA	NA	NA	0.274233	NA	NA	NA	0.27406	0.43184	1.84375	NA	0.331115	-0.954434	NA	NA	NA	-0.99403	-0.852405	-16.7237	NA	-0.961237
1918	chrII	725950	725996	+	NA	NA	NA	NA	1.23405	0.564518	3.68896	NA	3.73718	3.11884	2.74681	4.56571	3.10739	-7.15471	-7.04753	-8.64409	NA	-7.39112	-7.22225	-7.88845	-8.04482	-7.09294
1919	chrII	726106	726118	+	NA	NA	NA	NA	NA	NA	0.277664	NA	NA	NA	0.451531	0.371196	0.203763	NA	NA	-1.56155	NA	NA	NA	-7.16993	-1.53892	-1.58496
1920	chrII	726572	726633	+	NA	NA	NA	NA	NA	NA	0.31733	2.22033	NA	NA	NA	1.00223	NA	NA	NA	-2.46718	-13.8727	NA	NA	NA	-14.2553	NA
1921	chrII	727213	727278	+	NA	NA	NA	NA	NA	NA	0.594994	NA	NA	NA	NA	2.33854	NA	NA	NA	-7.53777	NA	NA	NA	NA	-11.6942	NA
1922	chrII	728352	728394	+	YBR257W	mRNA	SGD	constitutive	0.856979	0.75269	0.63466	0.787861	4.01124	0.527804	0.677296	1.26207	0.764112	-9.37777	-6.82432	-8.6347	-9.0929	-11.47	-5.53961	-9.49423	-6.96473	-8.48528
1923	chrII	728592	728597	+	YBR257W	mRNA	SGD	inducible	NA	NA	0.277664	NA	NA	NA	NA	NA	NA	NA	NA	-2.28763	NA	NA	NA	NA	NA	NA
1924	chrII	728812	728945	+	YBR257W	mRNA	SGD	constitutive	20.4475	12.3925	22.2528	29.2463	22.8217	16.9857	23.7806	27.5428	18.9245	-16.0243	-15.6666	-16.0089	-16.8913	-18.2192	-16.3957	-14.1905	-23.5449	-13.1906
1925	chrII	729003	729020	+	NA	NA	NA	NA	NA	NA	NA	0.740111	NA	0.767715	0.451531	1.37343	NA	NA	NA	NA	-1.30571	NA	-1.10347	-1.28585	-0.828237	NA
1926	chrII	729310	729326	+	NA	NA	NA	NA	NA	NA	NA	NA	NA	NA	0.225765	NA	NA	NA	NA	NA	NA	NA	NA	-4	NA	NA
1927	chrII	730281	730458	+	YBR259W	mRNA	SGD	constitutive	12.6661	8.27959	8.01258	11.985	8.0474	9.28456	5.53125	15.5531	4.17714	-13.1842	-12.9096	-10.1329	-10.6596	-13.4777	-14.2903	-7.9073	-17.3418	-17.4707
1928	chrII	730534	730551	+	NA	NA	NA	NA	NA	NA	NA	0.429742	NA	NA	NA	0.593914	NA	NA	NA	NA	-3.33025	NA	NA	NA	-3.89099	NA
1929	chrII	731598	731621	+	NA	NA	NA	NA	NA	NA	NA	NA	0.448462	NA	NA	NA	0.305645	NA	NA	NA	NA	-7.16968	NA	NA	NA	-3.80735
1930	chrII	732107	732125	+	NA	NA	NA	NA	NA	NA	NA	NA	NA	0.239911	NA	NA	NA	NA	NA	NA	NA	NA	-4.16993	NA	NA	NA
1931	chrII	735077	735079	+	CUT038	CUT	Xu_2009	NA	NA	NA	NA	NA	NA	NA	NA	0.371196	NA	NA	NA	NA	NA	NA	NA	NA	-0.881291	NA
1932	chrII	736020	736120	+	YBR263W	mRNA	SGD	inducible	1.5597	NA	NA	NA	NA	NA	NA	NA	NA	-17.3731	NA	NA	NA	NA	NA	NA	NA	NA
1934	chrII	736156	736549	+	YBR263W	mRNA	SGD	constitutive	169.99	137.366	222.885	138.043	75.8648	214.528	167.443	186.044	72.5651	-13.946	-10.9235	-10.279	-12.2818	-11.6477	-11.2952	-9.13747	-10.951	-18.7818
1935	chrII	736617	736739	+	NA	NA	NA	NA	7.59283	2.3656	3.76829	2.36358	1.17098	6.28567	5.56888	2.22718	2.54704	-20.6078	-18.4741	-18.7018	-18.4631	-18.5635	-18.6136	-21.4006	-18.5258	-17.6557
1936	chrII	736823	736889	+	NA	NA	NA	NA	2.99943	1.66667	0.674326	1.24148	NA	2.39911	1.95663	1.26207	NA	-11.1631	-9.51096	-8.66268	-11.2754	NA	-9.81564	-7.71153	-8.95116	NA
1937	chrII	736954	737000	+	NA	NA	NA	NA	0.668443	NA	NA	NA	NA	0.263902	NA	NA	NA	-12.5099	NA	NA	NA	NA	-2.30807	NA	NA	NA
1938	chrII	737069	737131	+	NA	NA	NA	NA	4.78194	1.07527	2.57831	1.64734	0.448462	4.48634	2.44579	0.593914	0.993345	-14.8686	-10.1996	-15.0917	-14.4957	-8.42422	-13.6518	-13.7815	-9.99516	-8.17131
1939	chrII	737319	737342	+	NA	NA	NA	NA	1.43972	0.591399	0.356996	0.310369	0.249145	0.839689	0.978316	0.408316	0.432997	-8.1379	-6.46914	-4.03345	-4.22206	-4.39232	-7.1643	-9.73829	-4.3661	-6.93926
1940	chrII	738495	738651	+	YBR265W	mRNA	SGD	constitutive	19.6248	17.5269	15.4302	9.81244	20.9781	14.5626	16.7066	16.3698	19.6886	-10.5121	-9.92635	-11.9768	-9.65781	-9.08411	-8.48677	-11.4529	-15.047	-13.6409
1941	chrII	738704	738712	+	NA	NA	NA	NA	NA	NA	NA	NA	NA	NA	NA	NA	0.331115	NA	NA	NA	NA	NA	NA	NA	NA	-4.72986
1942	chrII	738771	738782	+	NA	NA	NA	NA	NA	NA	NA	NA	NA	NA	0.263393	NA	NA	NA	NA	NA	NA	NA	NA	-3.40833	NA	NA
1943	chrII	738936	738971	+	NA	NA	NA	NA	1.31975	NA	1.03132	0.668488	0.672693	0.455831	0.752551	0.668153	1.29899	-11.6045	NA	-6.34075	-7.23235	-3.66636	-6.70734	-10.8672	-8.84597	-10.0381
1944	chrII	739091	739109	+	NA	NA	NA	NA	0.668443	0.268818	0.475995	NA	NA	0.551795	0.225765	NA	0.891464	-6.52273	-3.96872	-3.7535	NA	NA	-6.52735	-4.16993	NA	-5.80633
1945	chrII	739384	739386	+	YBR267W	mRNA	SGD	inducible	NA	NA	NA	NA	NA	NA	NA	NA	0.229234	NA	NA	NA	NA	NA	NA	NA	NA	-0.991076
1946	chrII	739738	739857	+	YBR267W	mRNA	SGD	constitutive	16.8996	9.62368	26.0211	21.2484	7.05082	15.9061	32.5102	24.833	24.961	-15.3579	-16.1439	-12.4418	-14.0482	-15.3063	-10.802	-10.7057	-15.3835	-15.2305
1947	chrII	739897	739954	+	NA	NA	NA	NA	0.685583	NA	0.713992	NA	NA	NA	0.940689	0.668153	0.967875	-10.2461	NA	-8.33238	NA	NA	NA	-9.74312	-11.4015	-8.94602
1948	chrII	740005	740216	+	NA	NA	NA	NA	3.78785	0.241936	5.8706	2.93657	0.498291	3.04687	4.66582	4.41724	7.00436	-13.1268	-11.4646	-14.546	-16.0211	-7.7757	-9.00932	-14.6334	-20.9515	-17.6971
1949	chrII	740402	740405	+	NA	NA	NA	NA	0.737002	NA	0.63466	0.549115	NA	NA	NA	NA	0.840523	-0.693127	NA	-2.1071	-0.755375	NA	NA	NA	NA	-0.845351
1950	chrII	740511	740513	+	NA	NA	NA	NA	NA	NA	NA	NA	NA	NA	0.413903	NA	NA	NA	NA	NA	NA	NA	NA	-0.845351	NA	NA
1951	chrII	741224	741338	+	YBR268W	mRNA	SGD	constitutive	24.8524	48.1722	22.6891	31.4189	27.7797	16.6258	29.199	18.003	27.0496	-13.5902	-15.0682	-13.2418	-15.713	-16.9634	-15.1505	-16.3761	-16.002	-14.7628
1952	chrII	741364	741378	+	NA	NA	NA	NA	NA	0.241936	NA	NA	0.323889	0.311884	0.413903	NA	0.305645	NA	-3.77338	NA	NA	-3.65977	-3.65977	-3.78463	NA	-3.49628
1953	chrII	741659	741666	+	NA	NA	NA	NA	NA	NA	NA	NA	NA	NA	0.225765	NA	NA	NA	NA	NA	NA	NA	NA	-2.80735	NA	NA
1954	chrII	741722	741916	+	SUT022	SUT	Xu_2009	NA	4.04494	2.68818	2.02298	2.67395	6.25355	0.43184	3.04783	3.26653	1.88481	-15.4567	-15.0563	-18.471	-21.7869	-16.0184	-7.55496	-20.4958	-25.2552	-16.4388
1955	chrII	742545	742578	+	NA	NA	NA	NA	NA	NA	NA	NA	1.07133	NA	NA	NA	NA	NA	NA	NA	NA	-11.2678	NA	NA	NA	NA
1956	chrII	742754	742785	+	2F-313	XUT	Van_Dijk_2011	NA	0.291373	0.322581	NA	2.26808	0.82218	0.623769	0.714923	1.74462	1.19711	-3.16201	-2.53292	NA	-10.4056	-8.24168	-5.90974	-10.7451	-8.64191	-11.1792
1957	chrII	744593	744613	+	YBR271W	mRNA	SGD	inducible	NA	0.349463	NA	0.26262	0.523206	NA	NA	NA	1.04429	NA	-3.84864	NA	-4.29613	-6.67804	NA	NA	NA	-6.57026
1958	chrII	744779	744901	+	YBR271W	mRNA	SGD	constitutive	7.83279	5.99464	8.56791	7.06687	3.96141	4.00651	11.6645	7.27545	9.75516	-2.93636	-5.43617	-2.65006	-0.625755	-7.9232	-4.26782	-3.83523	-2.7718	-5.69408
1959	chrII	749160	749192	+	YBR274W	mRNA	SGD	inducible	NA	NA	NA	NA	NA	NA	0.263393	0.334077	NA	NA	NA	NA	NA	NA	NA	-3.75111	-7.92481	NA
1960	chrII	749518	749597	+	YBR274W	mRNA	SGD	constitutive	6.23881	8.19895	7.17959	7.49661	13.2047	7.19733	8.91773	11.6184	7.31	-11.481	-14.8383	-16.9292	-19.2616	-15.1558	-16.7158	-18.5829	-17.8814	-15.5619
1961	chrII	749652	749656	+	NA	NA	NA	NA	NA	NA	NA	NA	NA	NA	NA	0.222718	NA	NA	NA	NA	NA	NA	NA	NA	-2	NA
1962	chrII	749757	749765	+	NA	NA	NA	NA	NA	NA	NA	NA	NA	NA	NA	0.631034	NA	NA	NA	NA	NA	NA	NA	NA	-4.56657	NA
1963	chrII	760226	760373	+	YBR278W	mRNA	SGD	constitutive	37.2272	43.1453	53.7874	58.8269	39.2653	36.6824	28.8603	35.8204	48.9796	-16.7994	-18.2459	-15.4837	-22.6337	-25.2033	-17.6205	-19.3019	-25.5315	-20.2686
1964	chrII	760400	760488	+	NA	NA	NA	NA	NA	NA	0.356996	0.358118	0.697607	0.599778	0.376275	1.29919	NA	NA	NA	-12.443	-12.4694	-11.1119	-11.0977	-9.56675	-15.1134	NA
1965	chrII	760581	760688	+	NA	NA	NA	NA	0.78842	0.698927	1.07099	0.931108	0.996582	0.311884	1.01594	1.26207	1.78293	-15.548	-11.1842	-15.8974	-10.5184	-13.3882	-3.92902	-14.3853	-12.6532	-13.4745
1966	chrII	761187	761311	+	YBR279W	mRNA	SGD	constitutive	107.465	79.2744	146.884	161.153	164.561	101.194	103.739	110.468	136.037	-11.1541	-12.6667	-10.482	-11.3784	-12.8872	-10.595	-10.5375	-10.6436	-13.1498
1967	chrII	761337	761362	+	NA	NA	NA	NA	1.52542	NA	1.98331	3.29469	2.3918	1.65539	1.88138	1.85598	2.26686	-5.71922	NA	-6.67932	-4.79044	-5.76869	-4.27547	-7.52666	-2.94785	-6.0873
1968	chrII	761431	761531	+	NA	NA	NA	NA	1.31975	0.322581	2.22131	2.5307	2.51637	1.48745	2.37054	1.93022	2.85268	-7.9002	-3.16993	-14.7543	-15.3957	-17.7224	-14.5897	-22.4725	-15.7036	-15.7824
1969	chrII	761583	761588	+	NA	NA	NA	NA	NA	NA	NA	NA	NA	NA	0.225765	NA	NA	NA	NA	NA	NA	NA	NA	-2.32193	NA	NA
1970	chrII	761669	762446	+	NA	NA	NA	NA	33.6964	17.2312	61.562	14.7545	39.3899	38.5297	21.3724	37.6022	47.4259	-36.7823	-31.8417	-40.6703	-39.8005	-34.4471	-40.7853	-37.3993	-40.8502	-41.1853
1971	chrII	767838	767895	+	YBR282W	mRNA	SGD	inducible	NA	1.23656	NA	0.238746	0.448462	NA	NA	1.00223	NA	NA	-11.1138	NA	-1.58496	-8.3564	NA	NA	-12.0401	NA
1972	chrII	768190	768251	+	YBR282W	mRNA	SGD	constitutive	60.7941	80.0002	66.7583	40.4196	69.387	41.3127	74.6531	58.7233	64.1854	-11.2665	-14.1779	-11.4296	-10.2753	-14.2963	-12.9039	-13.6091	-11.054	-10.5003
1973	chrII	768293	768336	+	NA	NA	NA	NA	NA	NA	0.872657	NA	NA	0.359867	0.827806	0.742393	0.815053	NA	NA	-6.19743	NA	NA	-7.8848	-8.96684	-7.05165	-8.16416
1974	chrII	768948	768988	+	NA	NA	NA	NA	10.438	1.1828	0.674326	16.9509	2.3918	5.01414	0.489158	14.9592	2.98004	-5.19401	-3.43636	-2.23332	-3.16288	-7.8883	-4.44622	-2.47048	-5.14875	-8.34533
1975	chrII	769037	769042	+	NA	NA	NA	NA	NA	NA	NA	NA	NA	NA	NA	0.556794	NA	NA	NA	NA	NA	NA	NA	NA	-1.67627	NA
1976	chrII	770505	770511	+	YBR284W	mRNA	SGD	inducible	NA	NA	NA	NA	NA	NA	NA	0.334077	NA	NA	NA	NA	NA	NA	NA	NA	-2.37376	NA
1977	chrII	770856	770941	+	YBR284W	mRNA	SGD	constitutive	4.1992	5.7527	4.79961	10.4571	4.48462	3.7666	2.93495	8.90871	9.09293	-12.9377	-16.0822	-13.7206	-16.5717	-13.0093	-11.7252	-9.3419	-16.4869	-10.3888
1978	chrII	771094	771112	+	YBR284W	mRNA	SGD	inducible	NA	NA	NA	NA	NA	NA	NA	NA	0.331115	NA	NA	NA	NA	NA	NA	NA	NA	-3.71328
1979	chrII	771172	771272	+	YBR284W	mRNA	SGD	constitutive	8.07274	11.9624	17.7705	53.9088	30.4456	35.4589	10.0466	30.5123	27.1005	-13.6803	-14.3565	-13.7384	-12.9057	-10.9166	-12.4094	-12.4672	-13.4326	-12.3043
1980	chrII	771315	771382	+	NA	NA	NA	NA	NA	NA	NA	1.16985	0.996582	0.311884	NA	1.11359	0.942405	NA	NA	NA	-12.3614	-11.6356	-4.15211	NA	-15.0511	-11.7949
1981	chrII	771746	771748	+	NA	NA	NA	NA	NA	NA	NA	0.381993	NA	NA	NA	NA	NA	NA	NA	NA	-0.954434	NA	NA	NA	NA	NA
1982	chrII	771805	771847	+	NA	NA	NA	NA	NA	NA	NA	NA	NA	NA	NA	0.779512	NA	NA	NA	NA	NA	NA	NA	NA	-12.3932	NA
1983	chrII	771942	772029	+	NA	NA	NA	NA	NA	0.672045	0.515661	0.596864	6.52761	NA	0.677296	0.927991	NA	NA	-7.02562	-3.19238	-4.0449	-14.3117	NA	-4.08746	-10.2223	NA
1984	chrII	773295	773369	+	NA	NA	NA	NA	3.82213	1.1828	1.78498	9.59757	25.1139	4.55831	2.1824	11.173	2.57251	-13.417	-9.13292	-11.2734	-14.6005	-13.4059	-12.4878	-9.96615	-16.3904	-10.2712
1985	chrII	773766	774107	+	YBR285W	mRNA	SGD	constitutive	15.9227	11.8549	34.0336	28.5301	172.733	24.6868	32.5855	45.62	33.7483	-23.3536	-18.1724	-19.8489	-13.4472	-20.1969	-16.0019	-23.0665	-19.424	-29.7558
1986	chrII	774609	775283	+	YBR286W	mRNA	SGD	constitutive	112.059	98.3067	154.857	139.977	223.459	143.419	150.962	108.909	203.789	-41.4155	-30.9589	-43.6993	-41.3837	-33.6886	-42.5724	-39.064	-41.4537	-42.8257
1987	chrII	775330	775552	+	NA	NA	NA	NA	14.7915	7.47314	18.4845	8.11735	21.7504	14.8265	15.8788	11.4328	23.3564	-22.1477	-20.3002	-24.5356	-20.841	-19.6585	-23.644	-24.4589	-26.2019	-24.4927
1988	chrII	775651	776096	+	NA	NA	NA	NA	31.5368	13.9785	35.3029	12.8684	37.9199	25.5505	30.5159	19.3764	56.1367	-40.561	-38.6121	-35.9864	-30.5594	-41.1676	-33.8047	-42.9772	-36.1019	-39.9832
1989	chrII	776387	776395	+	YBR287W	mRNA	SGD	inducible	NA	NA	NA	NA	0.896924	0.959644	NA	0.631034	NA	NA	NA	NA	NA	-2.89224	-3	NA	-2.36138	NA
1990	chrII	776467	776601	+	YBR287W	mRNA	SGD	constitutive	360.617	304.732	235.022	351.434	373.295	359.387	203.264	317.558	355.414	-11.6289	-11.3678	-11.4151	-13.2369	-12.0077	-12.8019	-11.2166	-12.9312	-11.698
1991	chrII	776621	776665	+	NA	NA	NA	NA	0.942677	NA	NA	0.477491	NA	0.623769	0.865434	0.593914	1.04429	-8.47587	NA	NA	-6.13119	NA	-7.75498	-8.1163	-8.94033	-13.1582
1992	chrII	776718	776805	+	NA	NA	NA	NA	1.66254	0.698927	1.22965	1.71897	1.1959	1.72736	1.99426	2.70973	1.47728	-10.313	-4.43381	-4.20302	-14.0999	-4.63158	-13.7382	-9.15601	-9.65078	-8.7158
1993	chrII	776826	777211	+	NA	NA	NA	NA	45.2313	13.5753	21.6974	32.4217	23.2204	35.7467	17.2334	23.9793	45.5411	-21.8693	-21.5483	-29.8735	-27.9208	-19.1498	-27.3809	-28.9223	-34.1508	-22.931
1994	chrII	777262	777285	+	NA	NA	NA	NA	0.754141	NA	NA	0.787861	NA	0.551795	0.451531	NA	1.19711	-0.910776	NA	NA	-5.2109	NA	-2.14049	-2.53292	NA	-0.962344
1995	chrII	777396	777534	+	NA	NA	NA	NA	3.32508	0.698927	0.63466	1.02661	1.81876	1.99126	1.76849	0.519675	2.7508	-20.5009	-12.3387	-15.8978	-17.8918	-20.2719	-20.2573	-21.0435	-17.0753	-23.3102
1996	chrII	778489	778514	+	NA	NA	NA	NA	4.06208	NA	NA	NA	NA	NA	NA	1.22495	NA	0	NA	NA	NA	NA	NA	NA	-1.77004	NA
1997	chrII	779610	779696	+	YBR289W	mRNA	SGD	constitutive	13.1461	14.8925	73.3032	65.655	35.578	73.4368	32.5855	69.1539	46.3561	-13.0743	-13.4065	-12.3947	-10.7507	-15.3721	-11.7774	-16.3019	-12.1946	-15.6725
1998	chrII	779753	779783	+	NA	NA	NA	NA	1.18263	NA	6.54493	3.39019	2.59111	7.34128	1.919	6.75577	3.84603	-1.27666	NA	-1.49412	-1.32821	-1.4952	-1.3794	-1.38029	-3.74185	-1.43294
1999	chrII	779837	779952	+	NA	NA	NA	NA	NA	NA	4.00629	0.931108	0.573035	4.70226	0.677296	3.04381	2.13951	NA	NA	-18.3434	-15.3002	-14.0497	-16.3596	-16.155	-18.2162	-17.0589
2000	chrII	780094	780106	+	NA	NA	NA	NA	NA	NA	0.555327	NA	NA	0.383858	NA	0.816632	NA	NA	NA	-3.65462	NA	NA	-2.8633	NA	-7.06182	NA
2001	chrII	780160	780322	+	NA	NA	NA	NA	0.925537	0.618281	7.29859	0.501366	3.0894	7.86908	1.61798	7.98072	3.05645	-15.727	-13.9556	-25.2481	-13.5668	-19.4113	-25.3303	-19.4054	-25.2421	-18.2596
2002	chrII	780356	780521	+	NA	NA	NA	NA	NA	0.268818	3.0543	NA	NA	1.17556	0.639668	3.34077	NA	NA	-0.970951	-11.0937	NA	NA	-8.17905	-8.42704	-18.861	NA
2003	chrII	780891	780921	+	NA	NA	NA	NA	NA	NA	2.49897	NA	0.996582	NA	NA	2.2643	0.382056	NA	NA	-6.08182	NA	-5.52607	NA	NA	-6.17901	-6.89017
2004	chrII	781324	781355	+	NA	NA	NA	NA	NA	NA	NA	NA	NA	NA	NA	0.593914	NA	NA	NA	NA	NA	NA	NA	NA	-7.03365	NA
2005	chrII	781575	781601	+	NA	NA	NA	NA	NA	NA	NA	NA	NA	0.455831	NA	0.371196	NA	NA	NA	NA	NA	NA	-3.95196	NA	-2.50987	NA
2006	chrII	781813	781816	+	NA	NA	NA	NA	NA	NA	NA	NA	NA	NA	NA	0.296957	NA	NA	NA	NA	NA	NA	NA	NA	-1.58496	NA
2007	chrII	782038	782190	+	YBR290W	mRNA	SGD	constitutive	0.291373	0.322581	3.80796	1.45635	4.16073	3.04687	1.76849	5.71642	1.96122	-8.47	-10.0695	-20.7112	-14.706	-16.8088	-20.2164	-14.2752	-22.1239	-17.9568
2008	chrII	782253	782255	+	YBR290W	mRNA	SGD	inducible	NA	NA	NA	NA	NA	NA	NA	0.222718	NA	NA	NA	NA	NA	NA	NA	NA	-1	NA
2009	chrII	782540	782851	+	YBR290W	mRNA	SGD	constitutive	160.821	191.533	98.5706	310.584	414.254	127.801	148.478	189.756	160.463	-14.4655	-10.797	-13.7308	-13.4262	-11.5236	-12.7294	-12.8879	-12.9825	-18.2207
2010	chrII	782931	782947	+	NA	NA	NA	NA	NA	NA	NA	NA	NA	NA	NA	0.222718	0.356586	NA	NA	NA	NA	NA	NA	NA	-3.80735	-1.49032
2011	chrII	783098	783101	+	NA	NA	NA	NA	1.02837	0.75269	0.475995	0.907233	1.89351	0.86368	0.714923	1.33631	1.01882	-0.987138	-0.591673	-0.918296	-0.998001	-0.86804	-0.997772	-0.981941	-0.764205	-0.991076
2012	chrII	783207	783236	+	NA	NA	NA	NA	0.479908	0.537636	NA	0.668488	0.398633	0.767715	0.263393	0.631034	0.815053	-0.749595	-8.4661	NA	-5.76499	-0.896038	-5.85791	-2.28763	-4.87689	-4.21692
2013	chrII	784003	784013	+	NA	NA	NA	NA	NA	NA	NA	NA	NA	NA	NA	NA	0.280174	NA	NA	NA	NA	NA	NA	NA	NA	-3.14142
2014	chrII	784408	784452	+	NA	NA	NA	NA	0.754141	NA	NA	0.429742	0.27406	NA	0.827806	NA	0.585819	-9.72981	NA	NA	-4.03345	-8.4642	NA	-12.233	NA	-8.30686
2015	chrII	784789	784837	+	NA	NA	NA	NA	NA	NA	0.515661	1.88609	NA	0.839689	NA	1.48479	NA	NA	NA	-3.30773	-6.18508	NA	-7.8711	NA	-9.07755	NA
2016	chrII	785410	785518	+	SUT023	SUT	Xu_2009	NA	0.925537	1.55914	0.475995	0.501366	1.76893	NA	0.225765	1.74462	0.63676	-11.8333	-19.331	-12.4964	-8.87929	-17.987	NA	-9.73778	-15.2105	-9.48128
2017	chrII	785935	786027	+	SUT023	SUT	Xu_2009	NA	4.25061	2.98388	1.70565	2.60233	1.91842	1.15157	0.263393	3.7862	2.57251	-10.6736	-5.23628	-6.77624	-10.2084	-2.34404	-9.80189	-7.10375	-18.3425	-9.3888
2018	chrII	786394	786401	+	YBR293W	mRNA	SGD	inducible	NA	NA	NA	0.596864	NA	NA	NA	0.296957	NA	NA	NA	NA	-2.40155	NA	NA	NA	-2.67943	NA
2019	chrII	786987	787027	+	YBR293W	mRNA	SGD	inducible	0.377071	NA	NA	NA	NA	NA	NA	0.445436	0.356586	-3.43573	NA	NA	NA	NA	NA	NA	-6.48289	-3.52797
2020	chrII	787034	787389	+	YBR293W	mRNA	SGD	constitutive	39.7124	42.1238	35.1443	68.6155	76.5126	57.6026	49.0663	65.8502	36.5245	-7.02109	-10.2778	-11.4508	-10.6939	-11.8084	-9.20259	-13.6947	-14.8558	-9.53048
2021	chrII	787498	787570	+	NA	NA	NA	NA	NA	NA	NA	0.310369	NA	NA	NA	0.296957	NA	NA	NA	NA	-9.44616	NA	NA	NA	-3.3018	NA
2022	chrII	788147	788168	+	NA	NA	NA	NA	NA	NA	NA	NA	NA	NA	0.376275	NA	NA	NA	NA	NA	NA	NA	NA	-4.39232	NA	NA
2023	chrII	789118	789170	+	YBR294W	mRNA	SGD	inducible	1.38831	NA	0.356996	0.477491	3.53787	NA	1.46747	NA	NA	-9.22589	NA	-4.28336	-4.43924	-11.2314	NA	-5.68439	NA	NA
2024	chrII	791281	791401	+	NA	NA	NA	NA	NA	NA	0.594994	0.787861	NA	NA	0.489158	3.19229	0.254704	NA	NA	-16.9987	-11.6763	NA	NA	-7.08762	-18.8468	-12.9682
2025	chrII	791461	791627	+	NA	NA	NA	NA	1.83393	1.15592	3.53029	5.96864	0.523206	2.23117	1.20408	13.7714	1.1207	-19.2184	-17.6729	-20.4215	-18.4494	-8.82151	-16.973	-16.8064	-23.3817	-16.321
2026	chrII	792334	792496	+	YBR295W	mRNA	SGD	inducible	2.98229	3.09141	NA	8.85746	1.79385	1.3435	1.12883	4.49148	0.713171	-18.4172	-16.2356	NA	-16.5915	-14.1186	-12.0765	-17.5066	-16.9091	-5.75563
2027	chrII	792761	793114	+	YBR295W	mRNA	SGD	constitutive	25.5208	12.1506	12.9709	42.8787	15.3723	34.0674	13.433	39.9778	15.3077	-27.8836	-16.3606	-25.0949	-27.4149	-17.6461	-25.9908	-25.864	-30.5705	-28.9196
2028	chrII	793459	793470	+	NA	NA	NA	NA	0.719862	NA	NA	0.859484	NA	0.839689	NA	0.519675	0.432997	-4.05379	NA	NA	-3.79683	NA	-4.26432	NA	-1	-6.89388
2029	chrII	793796	793813	+	NA	NA	NA	NA	0.308512	NA	NA	NA	NA	NA	NA	0.259837	NA	-3.76655	NA	NA	NA	NA	NA	NA	-4.02708	NA
2030	chrII	793881	793884	+	NA	NA	NA	NA	NA	NA	NA	1.00273	NA	NA	NA	NA	NA	NA	NA	NA	-1.58237	NA	NA	NA	NA	NA
2031	chrII	795571	795615	+	NA	NA	NA	NA	NA	NA	NA	2.57845	0.697607	NA	0.225765	NA	NA	NA	NA	NA	-11.5232	-8.89614	NA	-2.80735	NA	NA
2032	chrII	798960	798972	+	NA	NA	NA	NA	NA	NA	NA	NA	NA	NA	NA	0.705273	NA	NA	NA	NA	NA	NA	NA	NA	-5.24064	NA
2033	chrII	799154	799276	+	SUT024	SUT	Xu_2009	NA	NA	0.2957	NA	NA	0.722522	0.527804	NA	NA	1.19711	NA	-7.10264	NA	NA	-14.3867	-12.7767	NA	NA	-15.4045
2034	chrII	799328	799495	+	SUT024	SUT	Xu_2009	NA	3.78785	2.12366	3.09397	29.1747	11.2863	1.15157	6.17092	6.97849	2.80174	-14.3095	-10.4892	-16.7847	-15.9552	-17.437	-10.9591	-14.7029	-17.8257	-12.5547
2035	chrII	799683	799728	+	YBR297W	mRNA	SGD	inducible	NA	NA	0.674326	1.67122	NA	NA	0.790178	NA	NA	NA	NA	-1.88737	-1.88092	NA	NA	-10.5769	NA	NA
2036	chrII	799819	799868	+	YBR297W	mRNA	SGD	inducible	1.37117	NA	0.753658	4.24967	2.7406	0.359867	0.263393	0.927991	0.534878	-9.20293	NA	-9.90616	-10.6347	-6.53787	-4.37823	-4.32743	-7.5551	-7.74506
2037	chrII	800345	800353	+	YBR297W	mRNA	SGD	inducible	NA	NA	NA	0.358118	0.448462	NA	NA	NA	NA	NA	NA	NA	-2.99037	-0.852405	NA	NA	NA	NA
[truncated: 41,336 more rows]

## Sheet: Data S6
Supplemental Data S6. Summary of properties of genes classified in this study.
##Column "Scientific name" and "Standard name" displays the scientific name or standard name of genes studied in this paper.
##Column "Gene type": a single-core-promoter gene or multi-core-promoter gene.
##Column "Gene revision category" indicates the categories of gene annotation revisions in this study. The categories include I, II, and III.
##Column "core promoter type": the type of every core promoters assigned to each gene
##Column "Core promoter shift": conditions in which the gene has promoter shift (FDR < 0.05, Chi-square test and Ds < -1 or Ds > 1). NA: core promoter shift not dected, or single-core-promoter
## Detailed description of growth conditions is provided in Table 1 .
Scientific name	Standard name	Gene type	Gene revision category	Core promoter type	Core promoter shift
YAL001C	TFC3	multi-core-promoter	NA	constitutive,inducible	DSA
YAL002W	VPS8	multi-core-promoter	NA	constitutive,inducible	Glc,H2O2,HS		H2O2
YAL003W	EFB1	multi-core-promoter	NA	constitutive,constitutive,inducible,inducible	DSA,Gal,Glc,NaCl
YAL005C	SSA1	multi-core-promoter	NA	constitutive,inducible,inducible,inducible	HS
YAL007C	ERP2	multi-core-promoter	NA	constitutive,inducible	Arrest,DSA,Gal,Glc,HS,NaCl
YAL008W	FUN14	multi-core-promoter	NA	constitutive,inducible	Arrest,DD,DSA,Glc,H2O2,HS,NaCl
YAL009W	SPO7	single-core-promoter	NA	constitutive	NA
YAL010C	MDM10	single-core-promoter	NA	constitutive	NA
YAL011W	SWC3	single-core-promoter	NA	constitutive	NA
YAL012W	CYS3	single-core-promoter	NA	constitutive	NA
YAL013W	DEP1	single-core-promoter	NA	constitutive	NA
YAL014C	SYN8	single-core-promoter	NA	constitutive	NA
YAL015C	NTG1	multi-core-promoter	NA	constitutive,inducible	HS
YAL016C-A	NA	single-core-promoter	NA	inducible	NA
YAL016W	TPD3	single-core-promoter	NA	constitutive	NA
YAL017W	PSK1	multi-core-promoter	NA	constitutive,constitutive	NA
YAL018C	LDS1	multi-core-promoter	NA	inducible,inducible,inducible,inducible,inducible	NA
YAL019W	FUN30	multi-core-promoter	NA	constitutive,inducible	DSA,NaCl
YAL019W-A	NA	single-core-promoter	NA	inducible	NA
YAL020C	ATS1	multi-core-promoter	NA	constitutive,inducible	NaCl
YAL021C	CCR4	multi-core-promoter	NA	constitutive,inducible	NA
YAL022C	FUN26	single-core-promoter	NA	constitutive	NA
YAL023C	PMT2	single-core-promoter	NA	constitutive	NA
YAL024C	LTE1	single-core-promoter	NA	constitutive	NA
YAL025C	MAK16	single-core-promoter	NA	constitutive	NA
YAL026C	DRS2	single-core-promoter	NA	constitutive	NA
YAL026C-A	NA	multi-core-promoter	NA	inducible,inducible,inducible	NA
YAL027W	SAW1	single-core-promoter	NA	constitutive	NA
YAL028W	FRT2	multi-core-promoter	NA	constitutive,inducible	HS,NaCl
YAL029C	MYO4	multi-core-promoter	NA	constitutive,constitutive,constitutive	Arrest,DD,Glc,H2O2,HS
YAL030W	SNC1	multi-core-promoter	NA	constitutive,inducible,inducible	HS
YAL031C	GIP4	multi-core-promoter	NA	constitutive,inducible	HS
YAL031W-A	NA	single-core-promoter	NA	inducible	NA
YAL032C	PRP45	single-core-promoter	NA	constitutive	NA
YAL033W	POP5	multi-core-promoter	NA	constitutive,inducible	DD,Gal,Glc,HS,NaCl
YAL034C	FUN19	multi-core-promoter	NA	constitutive,inducible,inducible,inducible,constitutive,inducible,inducible	NaCl
YAL034W-A	MTW1	single-core-promoter	NA	constitutive	NA
YAL035W	FUN12	single-core-promoter	NA	constitutive	NA
YAL036C	RBG1	single-core-promoter	NA	constitutive	NA
YAL037W	NA	multi-core-promoter	NA	constitutive,inducible,constitutive	Arrest,Glc,NaCl
YAL038W	CDC19	multi-core-promoter	NA	constitutive,inducible	DD,NaCl
YAL039C	CYC3	multi-core-promoter	NA	constitutive,inducible,inducible,inducible	Arrest,HS
YAL040C	CLN3	multi-core-promoter	NA	inducible,inducible,constitutive,inducible,inducible	HS,NaCl
YAL041W	CDC24	multi-core-promoter	NA	constitutive,inducible	NA
YAL042C-A	YAL043C-A	multi-core-promoter	NA	inducible,inducible,inducible,inducible	NA
YAL042W	ERV46	single-core-promoter	NA	constitutive	NA
YAL043C	PTA1	single-core-promoter	NA	constitutive	NA
YAL044C	GCV3	single-core-promoter	NA	constitutive	NA
YAL044W-A	BOL1	multi-core-promoter	NA	constitutive,inducible,inducible,inducible,inducible	Arrest,DD,DSA,Gal,Glc
YAL046C	BOL3	single-core-promoter	NA	constitutive	NA
YAL047C	SPC72	multi-core-promoter	NA	constitutive,inducible	NaCl
YAL047W-A	NA	single-core-promoter	NA	inducible	NA
YAL048C	GEM1	multi-core-promoter	NA	constitutive,inducible	NA
YAL049C	AIM2	single-core-promoter	NA	constitutive	NA
YAL051W	OAF1	single-core-promoter	NA	constitutive	NA
YAL053W	FLC2	single-core-promoter	NA	constitutive	NA
YAL054C	ACS1	multi-core-promoter	NA	constitutive,constitutive	Arrest,DD,DSA,Gal,Glc,H2O2
YAL055W	PEX22	single-core-promoter	NA	constitutive	NA
YAL056W	GPB2	single-core-promoter	NA	constitutive	NA
YAL058W	CNE1	single-core-promoter	NA	constitutive	NA
YAL059C-A	NA	single-core-promoter	NA	inducible	NA
YAL059W	ECM1	single-core-promoter	I	constitutive	NA
YAL060W	BDH1	multi-core-promoter	NA	constitutive,inducible,inducible,inducible	DSA,Glc,NaCl
YAL061W	BDH2	multi-core-promoter	NA	constitutive,inducible	NA
YAL062W	GDH3	multi-core-promoter	NA	constitutive,constitutive	Arrest,DD,DSA,Gal,H2O2,HS
YAL063C	FLO9	multi-core-promoter	NA	inducible,inducible	NA
YAL063C-A	NA	multi-core-promoter	NA	inducible,inducible	NA
YAL064W	NA	single-core-promoter	NA	inducible	NA
YAL064W-B	NA	multi-core-promoter	NA	inducible,inducible,constitutive	NA
YAL066W	NA	single-core-promoter	NA	inducible	NA
YAL067C	SEO1	multi-core-promoter	NA	inducible,inducible	NA
YAR002C-A	ERP1	single-core-promoter	NA	constitutive	NA
YAR002W	NUP60	multi-core-promoter	NA	constitutive,inducible	NA
YAR003W	SWD1	single-core-promoter	NA	constitutive	NA
YAR007C	RFA1	single-core-promoter	NA	constitutive	NA
YAR008W	SEN34	single-core-promoter	NA	constitutive	NA
YAR014C	BUD14	multi-core-promoter	NA	constitutive,inducible	HS
YAR015W	ADE1	single-core-promoter	NA	constitutive	NA
YAR018C	KIN3	multi-core-promoter	NA	constitutive,inducible	Arrest
YAR019C	CDC15	single-core-promoter	NA	constitutive	NA
YAR019W-A	NA	single-core-promoter	NA	inducible	NA
YAR020C	PAU7	multi-core-promoter	NA	inducible,inducible	NA
YAR023C	DUP240%20family%20protein	multi-core-promoter	NA	constitutive,inducible,inducible	DD,DSA,HS
YAR027W	UIP3	multi-core-promoter	NA	constitutive,inducible,constitutive,inducible,inducible,inducible	Arrest,DD,DSA,H2O2,HS
YAR028W	DUP240%20family%20protein	single-core-promoter	NA	constitutive	NA
YAR029W	DUP240%20family%20protein	multi-core-promoter	NA	inducible,inducible,constitutive	NA
YAR030C	NA	multi-core-promoter	NA	inducible,inducible	NA
YAR031W	PRM9	single-core-promoter	II	constitutive	NA
YAR033W	MST28	single-core-promoter	NA	constitutive	NA
YAR035W	YAT1	multi-core-promoter	NA	inducible,inducible,inducible,inducible	DSA,HS,NaCl
YAR042W	SWH1	single-core-promoter	NA	constitutive	NA
YAR053W	NA	single-core-promoter	NA	inducible	NA
YAR073W	IMD1	single-core-promoter	NA	inducible	NA
YBL001C	ECM15	multi-core-promoter	NA	constitutive,inducible,inducible	HS,NaCl
YBL002W	HTB2	multi-core-promoter	NA	constitutive,inducible	Arrest,DSA,Glc,HS
YBL003C	HTA2	multi-core-promoter	NA	constitutive,inducible,inducible,inducible	Arrest,DD,Gal,Glc,H2O2,NaCl
YBL004W	UTP20	single-core-promoter	NA	constitutive	NA
YBL005W	PDR3	single-core-promoter	NA	constitutive	NA
YBL006C	LDB7	multi-core-promoter	NA	constitutive,inducible,inducible,inducible	Gal,HS,NaCl
YBL006W-A	NA	multi-core-promoter	NA	inducible,inducible,inducible	NA
YBL007C	SLA1	multi-core-promoter	NA	constitutive,inducible	DD,Glc,HS
YBL008W	HIR1	single-core-promoter	NA	constitutive	NA
YBL009W	ALK2	single-core-promoter	NA	constitutive	NA
YBL010C	NA	single-core-promoter	III	constitutive	NA
YBL011W	SCT1	multi-core-promoter	NA	constitutive,inducible	H2O2
YBL013W	FMT1	single-core-promoter	NA	constitutive	NA
YBL014C	RRN6	multi-core-promoter	NA	constitutive,inducible	DD,Glc,H2O2,HS,NaCl
YBL015W	ACH1	multi-core-promoter	NA	constitutive,inducible,inducible	H2O2,NaCl
YBL016W	FUS3	multi-core-promoter	NA	constitutive,constitutive,inducible	Arrest,DD,Gal,Glc,H2O2,NaCl
YBL017C	PEP1	multi-core-promoter	NA	constitutive,constitutive,inducible	Arrest,DD,Glc,H2O2
YBL018C	POP8	single-core-promoter	NA	constitutive	NA
YBL019W	APN2	single-core-promoter	NA	constitutive	NA
YBL020W	RFT1	multi-core-promoter	NA	constitutive,inducible,constitutive	DD,DSA,Gal,H2O2,HS,NaCl
YBL021C	HAP3	multi-core-promoter	NA	constitutive,inducible	Glc,HS
YBL022C	PIM1	single-core-promoter	NA	constitutive	NA
YBL023C	MCM2	single-core-promoter	NA	constitutive	NA
YBL024W	NCL1	multi-core-promoter	NA	constitutive,inducible	Arrest,DSA,Gal,HS,NaCl
YBL025W	RRN10	multi-core-promoter	NA	constitutive,inducible,inducible	NA
YBL026W	LSM2	multi-core-promoter	NA	constitutive,inducible,inducible,inducible	Arrest,DSA,Gal
YBL027W	RPL19B	multi-core-promoter	NA	constitutive,inducible	DSA,NaCl
YBL028C	NA	multi-core-promoter	NA	constitutive,inducible	Arrest,DSA,Glc,HS,NaCl
YBL029C-A	NA	multi-core-promoter	NA	constitutive,inducible,inducible,inducible	Arrest,Glc,HS
YBL029W	NA	multi-core-promoter	NA	constitutive,inducible	Arrest,DSA,Glc,NaCl
YBL030C	PET9	multi-core-promoter	NA	constitutive,inducible	DSA,Glc,HS
YBL031W	SHE1	multi-core-promoter	NA	constitutive,inducible	Glc,HS
YBL032W	HEK2	single-core-promoter	NA	constitutive	NA
YBL033C	RIB1	single-core-promoter	NA	constitutive	NA
YBL034C	STU1	multi-core-promoter	NA	constitutive,inducible	Arrest,HS
YBL035C	POL12	single-core-promoter	NA	constitutive	NA
YBL036C	NA	single-core-promoter	NA	constitutive	NA
YBL037W	APL3	multi-core-promoter	NA	constitutive,inducible	HS
YBL038W	MRPL16	single-core-promoter	NA	constitutive	NA
YBL039C	URA7	single-core-promoter	NA	constitutive	NA
YBL039C-A	NA	multi-core-promoter	NA	inducible,inducible,inducible,inducible,inducible	HS
YBL039W-B	YBL039W-A	single-core-promoter	NA	constitutive	NA
YBL040C	ERD2	multi-core-promoter	NA	constitutive,inducible,inducible	DSA,Gal,HS
YBL041W	PRE7	multi-core-promoter	NA	constitutive,inducible	HS
YBL042C	FUI1	single-core-promoter	NA	constitutive	NA
YBL043W	ECM13	multi-core-promoter	NA	constitutive,inducible	DD,DSA,Gal,Glc,H2O2,HS
YBL045C	COR1	single-core-promoter	NA	constitutive	NA
YBL046W	PSY4	multi-core-promoter	NA	constitutive,inducible	DSA,Gal,Glc,HS,NaCl
YBL047C	EDE1	single-core-promoter	NA	constitutive	NA
YBL048W	RRT1	single-core-promoter	NA	inducible	NA
YBL049W	MOH1	multi-core-promoter	NA	constitutive,inducible	Arrest,NaCl
YBL050W	SEC17	single-core-promoter	NA	constitutive	NA
YBL051C	PIN4	multi-core-promoter	NA	constitutive,inducible,inducible,inducible	NA
YBL052C	SAS3	multi-core-promoter	NA	constitutive,inducible,inducible	H2O2
YBL053W	NA	multi-core-promoter	NA	inducible,inducible	NA
YBL054W	TOD6	multi-core-promoter	NA	constitutive,inducible	Arrest,DD,DSA,Gal,Glc,H2O2,HS,NaCl
YBL055C	NA	multi-core-promoter	II	constitutive,constitutive,inducible	DSA
YBL056W	PTC3	multi-core-promoter	NA	constitutive,inducible,inducible	NA
YBL057C	PTH2	multi-core-promoter	NA	constitutive,inducible	HS
YBL058W	SHP1	single-core-promoter	NA	constitutive	NA
YBL059C-A	CMC2	multi-core-promoter	NA	constitutive,constitutive,inducible	NaCl
YBL059W	NA	single-core-promoter	I	constitutive	NA
YBL060W	YEL1	multi-core-promoter	NA	constitutive,constitutive	Arrest,NaCl
YBL061C	SKT5	single-core-promoter	NA	constitutive	NA
YBL063W	KIP1	multi-core-promoter	NA	constitutive,inducible	DD,HS
YBL064C	PRX1	multi-core-promoter	NA	constitutive,inducible	Glc,H2O2,NaCl
YBL065W	NA	multi-core-promoter	NA	inducible,inducible	NA
YBL066C	SEF1	multi-core-promoter	NA	constitutive,inducible	NA
YBL067C	UBP13	multi-core-promoter	NA	inducible,constitutive,constitutive	Arrest,DD,DSA,Gal,Glc,H2O2,HS,NaCl
YBL068W	PRS4	single-core-promoter	NA	constitutive	NA
YBL068W-A	NA	multi-core-promoter	NA	inducible,inducible	NA
YBL069W	AST1	multi-core-promoter	NA	constitutive,inducible	NaCl
YBL071C-B	NA	multi-core-promoter	NA	inducible,inducible	NA
YBL071W-A	KTI11	single-core-promoter	NA	constitutive	NA
YBL072C	RPS8A	single-core-promoter	NA	constitutive	NA
YBL073W	NA	multi-core-promoter	NA	inducible,inducible	NA
YBL074C	AAR2	multi-core-promoter	NA	constitutive,inducible,inducible	Gal
YBL075C	SSA3	multi-core-promoter	NA	constitutive,inducible,inducible	DSA,HS
YBL076C	ILS1	single-core-promoter	NA	constitutive	NA
YBL077W	NA	single-core-promoter	NA	inducible	NA
YBL078C	ATG8	multi-core-promoter	NA	constitutive,inducible	Glc,HS
YBL079W	NUP170	multi-core-promoter	NA	constitutive,inducible	DD,NaCl
YBL080C	PET112	multi-core-promoter	NA	constitutive,inducible	DSA,HS
YBL081W	NA	multi-core-promoter	NA	inducible,constitutive	DD,DSA,Glc,HS,NaCl
YBL082C	ALG3	multi-core-promoter	NA	constitutive,inducible	NA
YBL083C	NA	multi-core-promoter	NA	inducible,inducible	NA
YBL084C	CDC27	single-core-promoter	NA	constitutive	NA
YBL085W	BOI1	multi-core-promoter	NA	constitutive,inducible	NA
YBL086C	NA	single-core-promoter	NA	constitutive	NA
YBL087C	RPL23A	single-core-promoter	NA	constitutive	NA
YBL088C	TEL1	multi-core-promoter	NA	constitutive,inducible	DD,Glc,H2O2,HS,NaCl
YBL089W	AVT5	multi-core-promoter	NA	constitutive,constitutive	HS
YBL090W	MRP21	single-core-promoter	NA	constitutive	NA
YBL091C	MAP2	multi-core-promoter	NA	constitutive,inducible,inducible	DD,Glc,H2O2
YBL091C-A	SCS22	multi-core-promoter	NA	constitutive,inducible	NaCl
YBL092W	RPL32	multi-core-promoter	NA	constitutive,inducible,inducible	DSA,Gal,Glc,HS,NaCl
YBL093C	ROX3	multi-core-promoter	NA	constitutive,inducible,inducible	Gal,NaCl
YBL094C	NA	single-core-promoter	NA	inducible	NA
YBL095W	MRX3	single-core-promoter	NA	constitutive	NA
YBL097W	BRN1	single-core-promoter	NA	constitutive	NA
YBL098W	BNA4	single-core-promoter	NA	constitutive	NA
YBL099W	ATP1	single-core-promoter	NA	constitutive	NA
YBL101C	ECM21	multi-core-promoter	NA	constitutive,inducible	DSA,Gal,Glc,HS
YBL102W	SFT2	multi-core-promoter	NA	constitutive,constitutive	DD,Glc,H2O2,HS
YBL103C	RTG3	multi-core-promoter	NA	constitutive,constitutive	DD,Glc,H2O2,HS,NaCl
YBL104C	SEA4	single-core-promoter	NA	constitutive	NA
YBL105C	PKC1	single-core-promoter	NA	constitutive	NA
YBL106C	SRO77	multi-core-promoter	NA	inducible,inducible	NA
YBL107C	MIX23	single-core-promoter	NA	constitutive	NA
YBL107W-A	NA	single-core-promoter	NA	inducible	NA
YBR001C	NTH2	single-core-promoter	NA	constitutive	NA
YBR002C	RER2	single-core-promoter	NA	constitutive	NA
YBR003W	COQ1	multi-core-promoter	NA	constitutive,inducible	NA
YBR004C	GPI18	multi-core-promoter	NA	constitutive,inducible	NA
YBR005W	RCR1	single-core-promoter	NA	constitutive	NA
YBR006W	UGA2	single-core-promoter	NA	constitutive	NA
YBR007C	DSF2	single-core-promoter	NA	constitutive	NA
YBR008C	FLR1	multi-core-promoter	NA	inducible,constitutive,inducible,constitutive	Arrest,DD,DSA,Glc,H2O2,HS,NaCl
YBR009C	HHF1	multi-core-promoter	NA	constitutive,constitutive,inducible	Arrest,DD,DSA,Gal,Glc,HS,NaCl
YBR010W	HHT1	multi-core-promoter	NA	constitutive,inducible	Arrest,DSA,Glc,HS,NaCl
YBR011C	IPP1	multi-core-promoter	NA	constitutive,inducible	NA
YBR012C	NA	multi-core-promoter	I	inducible,constitutive	Arrest,H2O2
YBR013C	NA	multi-core-promoter	NA	constitutive,inducible	DSA,Gal,NaCl
YBR014C	GRX7	single-core-promoter	NA	constitutive	NA
YBR015C	MNN2	multi-core-promoter	NA	constitutive,constitutive,inducible,inducible	Arrest,DSA,Gal,Glc,HS
YBR016W	NA	multi-core-promoter	NA	constitutive,inducible	NA
YBR017C	KAP104	multi-core-promoter	NA	constitutive,inducible	Gal
YBR018C	GAL7	single-core-promoter	NA	constitutive	NA
YBR019C	GAL10	single-core-promoter	NA	inducible	NA
YBR020W	GAL1	multi-core-promoter	NA	inducible,inducible	NA
YBR021W	FUR4	single-core-promoter	NA	inducible	NA
YBR022W	POA1	single-core-promoter	NA	constitutive	NA
YBR023C	CHS3	single-core-promoter	NA	constitutive	NA
YBR024W	SCO2	multi-core-promoter	NA	constitutive,inducible	NA
YBR025C	OLA1	multi-core-promoter	NA	constitutive,inducible	NaCl
YBR026C	ETR1	single-core-promoter	NA	constitutive	NA
YBR028C	YPK3	single-core-promoter	NA	constitutive	NA
YBR029C	CDS1	multi-core-promoter	NA	constitutive,inducible	DSA,Gal,NaCl
YBR030W	RKM3	multi-core-promoter	NA	constitutive,constitutive,inducible	Gal,HS
YBR031W	RPL4A	single-core-promoter	NA	constitutive	NA
YBR033W	EDS1	multi-core-promoter	NA	inducible,inducible	NA
YBR034C	HMT1	multi-core-promoter	NA	constitutive,inducible	DSA,Glc,HS
YBR035C	PDX3	multi-core-promoter	NA	constitutive,inducible,inducible	HS
YBR036C	CSG2	single-core-promoter	NA	constitutive	NA
YBR037C	SCO1	single-core-promoter	NA	constitutive	NA
YBR038W	CHS2	single-core-promoter	NA	constitutive	NA
YBR039W	ATP3	single-core-promoter	NA	constitutive	NA
YBR040W	FIG1	single-core-promoter	NA	inducible	NA
YBR041W	FAT1	single-core-promoter	NA	constitutive	NA
YBR042C	CST26	single-core-promoter	NA	constitutive	NA
YBR043C	QDR3	single-core-promoter	NA	constitutive	NA
YBR044C	TCM62	multi-core-promoter	II	inducible,constitutive,inducible	Arrest,Glc,HS
YBR045C	GIP1	single-core-promoter	NA	inducible	NA
YBR046C	ZTA1	single-core-promoter	NA	constitutive	NA
YBR047W	FMP23	single-core-promoter	NA	constitutive	NA
YBR048W	RPS11B	multi-core-promoter	NA	constitutive,inducible	DSA,Gal,HS,NaCl
YBR049C	REB1	multi-core-promoter	NA	constitutive,inducible	NA
YBR050C	REG2	multi-core-promoter	NA	constitutive,inducible,inducible	Arrest,Gal,NaCl
YBR051W	NA	single-core-promoter	NA	constitutive	NA
YBR052C	RFS1	multi-core-promoter	NA	constitutive,inducible	HS
YBR053C	NA	multi-core-promoter	NA	constitutive,inducible,inducible,inducible	Arrest,DD,DSA,Gal,Glc,H2O2,HS,NaCl
YBR054W	YRO2	multi-core-promoter	NA	inducible,inducible,constitutive	Arrest,DSA,H2O2,HS,NaCl
YBR055C	PRP6	multi-core-promoter	NA	constitutive,constitutive	NA
YBR056C-B	NA	single-core-promoter	NA	inducible	NA
YBR056W	NA	single-core-promoter	NA	constitutive	NA
YBR056W-A	NA	single-core-promoter	NA	constitutive	NA
YBR057C	MUM2	single-core-promoter	NA	constitutive	NA
YBR058C	UBP14	multi-core-promoter	NA	constitutive,inducible	HS
YBR058C-A	TSC3	multi-core-promoter	NA	constitutive,inducible	HS
YBR059C	AKL1	single-core-promoter	NA	constitutive	NA
YBR060C	ORC2	single-core-promoter	NA	constitutive	NA
YBR061C	TRM7	multi-core-promoter	NA	constitutive,inducible	HS
YBR062C	NA	multi-core-promoter	NA	constitutive,inducible	NaCl
YBR063C	NA	multi-core-promoter	NA	inducible,inducible	NA
YBR065C	ECM2	single-core-promoter	NA	constitutive	NA
YBR066C	NRG2	multi-core-promoter	NA	constitutive,inducible,inducible	Arrest,DD,DSA,Gal,Glc,H2O2,HS
YBR067C	TIP1	multi-core-promoter	NA	constitutive,constitutive,inducible,inducible	Arrest,H2O2,HS,NaCl
YBR068C	BAP2	multi-core-promoter	NA	constitutive,inducible	DD,H2O2,HS,NaCl
YBR069C	TAT1	multi-core-promoter	NA	constitutive,inducible	Gal
YBR070C	ALG14	multi-core-promoter	NA	constitutive,inducible	DSA,Glc,HS
YBR071W	NA	single-core-promoter	NA	constitutive	NA
YBR072W	HSP26	multi-core-promoter	NA	constitutive,inducible,inducible	Arrest,DD,DSA,Gal,HS,NaCl
YBR073W	RDH54	single-core-promoter	I	constitutive	NA
YBR074W	PFF1	single-core-promoter	NA	constitutive	NA
YBR076C-A	NA	multi-core-promoter	NA	constitutive,constitutive,inducible	DD,Glc,NaCl
YBR077C	SLM4	multi-core-promoter	NA	constitutive,constitutive	HS
YBR078W	ECM33	multi-core-promoter	NA	constitutive,inducible	DSA,Gal,NaCl
YBR079C	RPG1	single-core-promoter	NA	constitutive	NA
YBR080C	SEC18	single-core-promoter	NA	constitutive	NA
YBR081C	SPT7	single-core-promoter	NA	constitutive	NA
YBR082C	UBC4	single-core-promoter	NA	constitutive	NA
YBR083W	TEC1	multi-core-promoter	NA	constitutive,constitutive,inducible,inducible	Arrest,DD,Glc,H2O2,HS
YBR084C-A	RPL19A	single-core-promoter	NA	constitutive	NA
YBR084W	MIS1	single-core-promoter	NA	constitutive	NA
YBR085C-A	NA	multi-core-promoter	NA	constitutive,inducible,inducible,inducible,constitutive	Arrest,DD,Gal,HS
YBR085W	AAC3	single-core-promoter	NA	constitutive	NA
YBR086C	IST2	single-core-promoter	NA	constitutive	NA
YBR087W	RFC5	multi-core-promoter	NA	constitutive,inducible	Arrest,DD,DSA,Gal,Glc,H2O2,HS,NaCl
YBR088C	POL30	single-core-promoter	NA	constitutive	NA
YBR089C-A	NHP6B	single-core-promoter	NA	constitutive	NA
YBR091C	TIM12	single-core-promoter	NA	constitutive	NA
YBR092C	PHO3	multi-core-promoter	NA	constitutive,inducible	DSA,Gal,HS,NaCl
YBR093C	PHO5	multi-core-promoter	NA	constitutive,constitutive,inducible,constitutive	Arrest,DD,DSA,Gal,Glc,HS,NaCl
YBR094W	PBY1	single-core-promoter	NA	constitutive	NA
YBR095C	RXT2	multi-core-promoter	NA	constitutive,inducible	NA
YBR096W	NA	single-core-promoter	NA	constitutive	NA
YBR097W	VPS15	multi-core-promoter	NA	constitutive,inducible	Arrest
YBR098W	MMS4	single-core-promoter	NA	constitutive	NA
YBR101C	FES1	single-core-promoter	NA	constitutive	NA
YBR102C	EXO84	single-core-promoter	NA	constitutive	NA
YBR103W	SIF2	single-core-promoter	NA	constitutive	NA
YBR104W	YMC2	multi-core-promoter	NA	inducible,constitutive	HS,NaCl
YBR105C	VID24	single-core-promoter	NA	constitutive	NA
YBR106W	PHO88	multi-core-promoter	NA	constitutive,inducible,inducible	DD,DSA,Glc,H2O2,HS,NaCl
YBR107C	IML3	single-core-promoter	NA	constitutive	NA
YBR108W	AIM3	multi-core-promoter	NA	constitutive,inducible	DD,DSA,Glc,NaCl
YBR109C	CMD1	single-core-promoter	NA	constitutive	NA
YBR109W-A	NA	single-core-promoter	NA	inducible	NA
YBR110W	ALG1	multi-core-promoter	NA	constitutive,constitutive	Glc,NaCl
YBR111C	YSA1	multi-core-promoter	II	constitutive,inducible	DSA,Gal,HS,NaCl
YBR111W-A	SUS1	multi-core-promoter	NA	constitutive,inducible,inducible	DSA,HS,NaCl
YBR112C	CYC8	multi-core-promoter	NA	constitutive,constitutive,constitutive,inducible	HS
YBR113W	NA	single-core-promoter	NA	inducible	NA
YBR114W	RAD16	multi-core-promoter	NA	constitutive,inducible	DD,DSA,Gal,Glc,HS,NaCl
YBR115C	LYS2	multi-core-promoter	NA	constitutive,inducible	Glc,HS,NaCl
YBR116C	NA	multi-core-promoter	NA	inducible,inducible	NA
YBR117C	TKL2	multi-core-promoter	NA	constitutive,inducible,inducible,inducible,inducible	Arrest,DD,DSA,Gal,Glc,H2O2,HS,NaCl
YBR118W	TEF2	multi-core-promoter	NA	constitutive,inducible,inducible,constitutive,inducible	Arrest,DSA,Gal,Glc,HS,NaCl
YBR119W	MUD1	multi-core-promoter	NA	constitutive,inducible,inducible	NA
YBR120C	CBP6	multi-core-promoter	NA	constitutive,inducible	HS
YBR121C	GRS1	single-core-promoter	NA	constitutive	NA
YBR121C-A	NA	multi-core-promoter	NA	inducible,inducible	NA
YBR122C	MRPL36	single-core-promoter	NA	constitutive	NA
YBR123C	TFC1	single-core-promoter	NA	constitutive	NA
YBR124W	NA	single-core-promoter	NA	inducible	NA
YBR125C	PTC4	multi-core-promoter	NA	inducible,constitutive,inducible,inducible	Glc
YBR126C	TPS1	multi-core-promoter	NA	constitutive,inducible,inducible,constitutive	NaCl
YBR126W-A	MEO1	multi-core-promoter	NA	constitutive,inducible	DSA,Gal,HS
YBR127C	VMA2	single-core-promoter	NA	constitutive	NA
YBR128C	ATG14	single-core-promoter	NA	constitutive	NA
YBR129C	OPY1	multi-core-promoter	NA	constitutive,inducible	HS
YBR130C	SHE3	single-core-promoter	NA	constitutive	NA
YBR131W	CCZ1	single-core-promoter	NA	constitutive	NA
YBR132C	AGP2	single-core-promoter	NA	constitutive	NA
YBR133C	HSL7	multi-core-promoter	NA	constitutive,constitutive	Arrest,DD,DSA,Gal,Glc,H2O2,HS,NaCl
YBR135W	CKS1	multi-core-promoter	NA	constitutive,inducible	DSA,Glc,HS
YBR136W	MEC1	single-core-promoter	NA	constitutive	NA
YBR137W	NA	multi-core-promoter	NA	constitutive,inducible	NA
YBR138C	HDR1	multi-core-promoter	NA	constitutive,inducible	HS
YBR139W	carboxypeptidase%20C	single-core-promoter	NA	constitutive	NA
YBR140C	IRA1	multi-core-promoter	NA	inducible,constitutive	Arrest,DSA,Gal,Glc,H2O2,HS,NaCl
YBR141C	BMT2	single-core-promoter	NA	constitutive	NA
YBR142W	MAK5	single-core-promoter	NA	constitutive	NA
YBR143C	SUP45	multi-core-promoter	NA	constitutive,inducible	Arrest,DD,DSA,Gal,Glc,H2O2,HS,NaCl
YBR145W	ADH5	multi-core-promoter	NA	constitutive,inducible	NaCl
YBR146W	MRPS9	single-core-promoter	NA	constitutive	NA
YBR147W	RTC2	single-core-promoter	NA	constitutive	NA
YBR148W	YSW1	single-core-promoter	NA	inducible	NA
YBR149W	ARA1	single-core-promoter	NA	constitutive	NA
YBR150C	TBS1	multi-core-promoter	NA	constitutive,inducible,inducible	Arrest,DSA,Gal,HS,NaCl
YBR151W	APD1	single-core-promoter	NA	constitutive	NA
YBR152W	SPP381	single-core-promoter	III	constitutive	NA
YBR153W	RIB7	multi-core-promoter	NA	constitutive,inducible,inducible	Glc
YBR154C	RPB5	multi-core-promoter	NA	constitutive,inducible	DSA,Glc,NaCl
YBR155W	CNS1	single-core-promoter	NA	constitutive	NA
YBR156C	SLI15	multi-core-promoter	NA	constitutive,inducible	HS
YBR157C	ICS2	multi-core-promoter	NA	constitutive,inducible,inducible,constitutive	DD,Glc,H2O2,HS
YBR158W	AMN1	multi-core-promoter	NA	inducible,constitutive,inducible,inducible	Arrest,DSA,HS,NaCl
YBR159W	IFA38	multi-core-promoter	NA	constitutive,inducible	H2O2
YBR160W	CDC28	multi-core-promoter	NA	constitutive,inducible	DSA,Glc,HS
YBR161W	CSH1	single-core-promoter	NA	constitutive	NA
YBR162C	TOS1	single-core-promoter	NA	constitutive	NA
YBR162W-A	YSY6	multi-core-promoter	NA	constitutive,inducible,constitutive,constitutive	Arrest,H2O2,HS
YBR163W	EXO5	multi-core-promoter	NA	constitutive,inducible,inducible	DD,DSA,Gal,Glc,HS,NaCl
YBR164C	ARL1	single-core-promoter	NA	constitutive	NA
YBR165W	UBS1	single-core-promoter	NA	constitutive	NA
YBR166C	TYR1	single-core-promoter	NA	constitutive	NA
YBR167C	POP7	multi-core-promoter	NA	constitutive,constitutive,constitutive,inducible	DSA,Gal,Glc
YBR168W	PEX32	multi-core-promoter	NA	constitutive,inducible,constitutive,inducible,inducible	Arrest,DD,HS
YBR169C	SSE2	single-core-promoter	NA	constitutive	NA
YBR170C	NPL4	single-core-promoter	NA	constitutive	NA
YBR171W	SEC66	single-core-promoter	NA	constitutive	NA
YBR172C	SMY2	single-core-promoter	NA	constitutive	NA
YBR173C	UMP1	single-core-promoter	NA	constitutive	NA
YBR174C	NA	single-core-promoter	NA	inducible	NA
YBR175W	SWD3	multi-core-promoter	NA	constitutive,inducible,inducible	NA
YBR176W	ECM31	single-core-promoter	NA	constitutive	NA
YBR177C	EHT1	single-core-promoter	NA	constitutive	NA
YBR178W	NA	single-core-promoter	NA	inducible	NA
YBR179C	FZO1	single-core-promoter	NA	constitutive	NA
YBR180W	DTR1	single-core-promoter	NA	inducible	NA
YBR181C	RPS6B	single-core-promoter	NA	constitutive	NA
YBR182C	SMP1	single-core-promoter	NA	constitutive	NA
YBR182C-A	NA	multi-core-promoter	NA	inducible,inducible,inducible	NA
YBR183W	YPC1	multi-core-promoter	NA	constitutive,inducible,inducible	Arrest,DSA,Glc,H2O2,HS,NaCl
YBR184W	NA	multi-core-promoter	NA	inducible,inducible	Glc,HS
YBR185C	MBA1	multi-core-promoter	NA	constitutive,inducible	DSA,Gal,HS
YBR186W	PCH2	multi-core-promoter	NA	constitutive,inducible	DD,DSA,Gal,Glc,HS,NaCl
YBR187W	GDT1	single-core-promoter	NA	constitutive	NA
YBR188C	NTC20	single-core-promoter	NA	constitutive	NA
YBR189W	RPS9B	single-core-promoter	NA	constitutive	NA
YBR191W	RPL21A	multi-core-promoter	NA	constitutive,inducible	DSA,Gal,Glc,HS,NaCl
YBR191W-A	NA	single-core-promoter	NA	constitutive	NA
YBR192W	RIM2	single-core-promoter	NA	constitutive	NA
YBR193C	MED8	multi-core-promoter	NA	constitutive,inducible,inducible	Arrest
YBR194W	AIM4	multi-core-promoter	NA	constitutive,inducible	Arrest,DSA
YBR195C	MSI1	single-core-promoter	NA	constitutive	NA
YBR196C	PGI1	single-core-promoter	NA	constitutive	NA
YBR196C-A	NA	single-core-promoter	NA	inducible	NA
YBR196C-B	NA	multi-core-promoter	NA	inducible,inducible,inducible,inducible	NA
YBR197C	NA	single-core-promoter	NA	constitutive	NA
YBR198C	TAF5	single-core-promoter	NA	constitutive	NA
YBR199W	KTR4	single-core-promoter	NA	constitutive	NA
YBR200W	BEM1	single-core-promoter	NA	constitutive	NA
YBR201C-A	NA	multi-core-promoter	NA	constitutive,constitutive,constitutive,inducible,inducible	DSA,HS
YBR201W	DER1	single-core-promoter	NA	constitutive	NA
YBR202W	MCM7	multi-core-promoter	NA	constitutive,inducible,inducible	NA
YBR203W	COS111	multi-core-promoter	NA	constitutive,constitutive	DD,DSA,Gal
YBR204C	LDH1	single-core-promoter	NA	constitutive	NA
YBR205W	KTR3	single-core-promoter	NA	constitutive	NA
YBR206W	NA	multi-core-promoter	NA	constitutive,inducible	NA
YBR207W	FTH1	single-core-promoter	NA	constitutive	NA
YBR208C	DUR1%2C2	multi-core-promoter	NA	constitutive,constitutive	Arrest,Gal,H2O2,NaCl
YBR209W	NA	single-core-promoter	NA	inducible	NA
YBR210W	ERV15	single-core-promoter	NA	constitutive	NA
YBR211C	AME1	multi-core-promoter	NA	constitutive,inducible	DSA,Glc,HS
YBR212W	NGR1	single-core-promoter	NA	constitutive	NA
YBR213W	MET8	single-core-promoter	NA	constitutive	NA
YBR214W	SDS24	single-core-promoter	NA	constitutive	NA
YBR215W	HPC2	single-core-promoter	NA	constitutive	NA
YBR216C	YBP1	multi-core-promoter	NA	constitutive,inducible	NA
YBR217W	ATG12	multi-core-promoter	NA	constitutive,inducible	NA
YBR218C	PYC2	multi-core-promoter	NA	constitutive,inducible	DD,DSA,Gal,Glc,H2O2,HS,NaCl
YBR220C	NA	multi-core-promoter	NA	constitutive,inducible	DSA,Gal
YBR221C	PDB1	single-core-promoter	NA	constitutive	NA
YBR221W-A	NA	single-core-promoter	NA	inducible	NA
YBR222C	PCS60	single-core-promoter	NA	constitutive	NA
YBR223C	TDP1	multi-core-promoter	NA	constitutive,inducible	NA
YBR225W	NA	single-core-promoter	NA	constitutive	NA
YBR227C	MCX1	multi-core-promoter	NA	constitutive,inducible	NA
YBR228W	SLX1	multi-core-promoter	NA	constitutive,constitutive	DD,H2O2
YBR229C	ROT2	multi-core-promoter	NA	constitutive,constitutive	DSA,Gal,H2O2,NaCl
YBR230C	OM14	multi-core-promoter	NA	constitutive,inducible,inducible	Gal
YBR230W-A	NA	multi-core-promoter	NA	constitutive,inducible,inducible,inducible	Arrest,DD,DSA,Gal,Glc,H2O2,HS,NaCl
YBR231C	SWC5	multi-core-promoter	NA	constitutive,inducible	NA
YBR233W	PBP2	single-core-promoter	NA	constitutive	NA
YBR233W-A	DAD3	multi-core-promoter	NA	constitutive,inducible	DD,NaCl
YBR234C	ARC40	single-core-promoter	NA	constitutive	NA
YBR235W	VHC1	single-core-promoter	NA	constitutive	NA
YBR236C	ABD1	multi-core-promoter	NA	constitutive,inducible,inducible	NaCl
YBR237W	PRP5	single-core-promoter	NA	constitutive	NA
YBR238C	NA	multi-core-promoter	NA	constitutive,inducible	Arrest,Glc,HS,NaCl
YBR239C	ERT1	single-core-promoter	NA	constitutive	NA
YBR240C	THI2	multi-core-promoter	NA	inducible,constitutive	Arrest,DD,DSA,Gal,Glc,H2O2,HS,NaCl
YBR241C	NA	multi-core-promoter	NA	constitutive,inducible	DD
YBR242W	NA	multi-core-promoter	NA	constitutive,constitutive,inducible,inducible,inducible	Arrest,DSA,Gal,Glc,H2O2,HS,NaCl
YBR243C	ALG7	multi-core-promoter	NA	constitutive,inducible	H2O2
YBR244W	GPX2	multi-core-promoter	NA	constitutive,constitutive	Arrest,DD,DSA,Gal,Glc,H2O2,HS,NaCl
YBR245C	ISW1	single-core-promoter	I	constitutive	NA
YBR246W	RRT2	single-core-promoter	NA	constitutive	NA
YBR247C	ENP1	single-core-promoter	NA	constitutive	NA
YBR248C	HIS7	single-core-promoter	NA	constitutive	NA
YBR249C	ARO4	multi-core-promoter	NA	constitutive,inducible,inducible	NaCl
YBR250W	SPO23	multi-core-promoter	II	constitutive,inducible	NA
YBR251W	MRPS5	multi-core-promoter	NA	constitutive,inducible,inducible	DD,DSA,HS
YBR252W	DUT1	single-core-promoter	NA	constitutive	NA
YBR253W	SRB6	multi-core-promoter	NA	constitutive,inducible	HS
YBR254C	TRS20	single-core-promoter	NA	constitutive	NA
YBR255C-A	RCF3	single-core-promoter	NA	constitutive	NA
YBR255W	MTC4	single-core-promoter	NA	constitutive	NA
YBR256C	RIB5	multi-core-promoter	NA	constitutive,inducible	NA
YBR257W	POP4	multi-core-promoter	NA	constitutive,inducible,constitutive	DD,DSA,Gal,H2O2
YBR258C	SHG1	multi-core-promoter	NA	constitutive,inducible	Arrest,Glc,H2O2,NaCl
YBR259W	NA	single-core-promoter	NA	constitutive	NA
YBR260C	RGD1	single-core-promoter	NA	constitutive	NA
YBR261C	TAE1	single-core-promoter	NA	constitutive	NA
YBR262C	MIC12	single-core-promoter	NA	constitutive	NA
YBR263W	SHM1	multi-core-promoter	NA	constitutive,inducible	Arrest
YBR264C	YPT10	single-core-promoter	NA	constitutive	NA
YBR265W	TSC10	single-core-promoter	NA	constitutive	NA
YBR266C	SLM6	single-core-promoter	NA	inducible	NA
YBR267W	REI1	multi-core-promoter	NA	constitutive,inducible	DD,DSA,HS
YBR268W	MRPL37	single-core-promoter	NA	constitutive	NA
YBR269C	SDH8	single-core-promoter	NA	constitutive	NA
YBR270C	BIT2	multi-core-promoter	NA	constitutive,constitutive	Arrest,DD,HS
YBR271W	EFM2	multi-core-promoter	NA	constitutive,inducible	DD,Gal
YBR272C	HSM3	single-core-promoter	NA	constitutive	NA
YBR273C	UBX7	multi-core-promoter	NA	constitutive,inducible	DSA,HS
YBR274W	CHK1	multi-core-promoter	NA	constitutive,inducible	HS
YBR275C	RIF1	single-core-promoter	NA	constitutive	NA
YBR276C	PPS1	single-core-promoter	NA	constitutive	NA
YBR277C	NA	single-core-promoter	NA	inducible	NA
YBR278W	DPB3	single-core-promoter	NA	constitutive	NA
YBR279W	PAF1	single-core-promoter	NA	constitutive	NA
YBR280C	SAF1	single-core-promoter	NA	constitutive	NA
YBR281C	DUG2	single-core-promoter	NA	constitutive	NA
YBR282W	MRPL27	multi-core-promoter	NA	constitutive,inducible	Arrest,DD,Glc,H2O2,NaCl
YBR283C	SSH1	multi-core-promoter	NA	constitutive,constitutive	DD,DSA,Gal,HS,NaCl
YBR284W	metallo-dependent%20hydrolase%20superfamily%20protein	multi-core-promoter	NA	constitutive,inducible,constitutive,inducible	DSA,Gal,Glc
YBR285W	NA	single-core-promoter	NA	constitutive	NA
YBR286W	APE3	single-core-promoter	NA	constitutive	NA
YBR287W	ZSP1	multi-core-promoter	NA	constitutive,inducible	Gal,Glc,HS
YBR288C	APM3	single-core-promoter	NA	constitutive	NA
YBR289W	SNF5	single-core-promoter	NA	constitutive	NA
YBR290W	BSD2	multi-core-promoter	NA	constitutive,inducible,constitutive	DD,Gal,Glc,H2O2,HS,NaCl
YBR291C	CTP1	single-core-promoter	NA	constitutive	NA
YBR292C	NA	multi-core-promoter	NA	inducible,constitutive	Arrest
YBR293W	VBA2	multi-core-promoter	II	constitutive,inducible,inducible	NA
YBR294W	SUL1	single-core-promoter	NA	inducible	NA
YBR295W	PCA1	multi-core-promoter	NA	constitutive,inducible	Arrest,DD,Gal,Glc,H2O2,HS,NaCl
YBR296C	PHO89	single-core-promoter	NA	constitutive	NA
YBR296C-A	NA	multi-core-promoter	NA	inducible,inducible,inducible	NA
YBR297W	MAL33	multi-core-promoter	NA	constitutive,inducible,inducible,inducible	Arrest
YBR298C	MAL31	multi-core-promoter	NA	inducible,inducible,constitutive	DSA
YBR299W	MAL32	multi-core-promoter	NA	inducible,inducible	DSA,H2O2,HS
YBR300C	NA	single-core-promoter	NA	inducible	NA
YCL001W	RER1	multi-core-promoter	NA	constitutive,inducible	DSA,HS
YCL001W-A	NA	multi-core-promoter	NA	inducible,constitutive,inducible	NA
YCL001W-B	NA	single-core-promoter	NA	inducible	NA
YCL002C	NA	single-core-promoter	NA	constitutive	NA
YCL004W	PGS1	multi-core-promoter	NA	constitutive,inducible	Arrest
YCL005W	LDB16	multi-core-promoter	NA	constitutive,inducible	Arrest,Gal
YCL005W-A	VMA9	multi-core-promoter	NA	constitutive,inducible	DD,DSA,HS
YCL007C	CWH36	single-core-promoter	NA	inducible	NA
YCL008C	STP22	multi-core-promoter	NA	constitutive,inducible	NA
YCL009C	ILV6	multi-core-promoter	NA	constitutive,inducible	DSA,HS,NaCl
YCL010C	SGF29	single-core-promoter	NA	constitutive	NA
YCL011C	GBP2	multi-core-promoter	NA	constitutive,inducible	DSA,HS
YCL012C	YCL011C-A	multi-core-promoter	NA	constitutive,inducible	NA
YCL014W	BUD3	multi-core-promoter	NA	constitutive,inducible,inducible	Arrest,DD,Glc,HS
YCL016C	DCC1	multi-core-promoter	NA	constitutive,inducible	Arrest,DD,DSA,Gal,Glc,H2O2,HS,NaCl
YCL017C	NFS1	single-core-promoter	NA	constitutive	NA
YCL021W-A	NA	multi-core-promoter	NA	constitutive,inducible,inducible	NA
YCL024W	KCC4	multi-core-promoter	NA	constitutive,inducible	DD,DSA,H2O2,HS,NaCl
YCL025C	AGP1	multi-core-promoter	NA	constitutive,inducible,constitutive	DD,Gal,H2O2,NaCl
YCL026C-A	FRM2	single-core-promoter	NA	inducible	NA
YCL026C-B	HBN1	single-core-promoter	NA	constitutive	NA
YCL027W	FUS1	single-core-promoter	NA	constitutive	NA
YCL028W	RNQ1	multi-core-promoter	NA	constitutive,inducible,inducible	Gal
YCL029C	BIK1	single-core-promoter	NA	constitutive	NA
YCL030C	HIS4	single-core-promoter	NA	constitutive	NA
YCL031C	RRP7	multi-core-promoter	NA	constitutive,inducible	NA
YCL032W	STE50	single-core-promoter	NA	constitutive	NA
YCL033C	MXR2	single-core-promoter	I	constitutive	NA
YCL034W	LSB5	multi-core-promoter	NA	constitutive,inducible,constitutive,inducible,inducible,inducible	Arrest,DD,Glc,H2O2
YCL035C	GRX1	multi-core-promoter	NA	constitutive,inducible	HS
YCL036W	GFD2	single-core-promoter	NA	constitutive	NA
YCL037C	SRO9	single-core-promoter	NA	constitutive	NA
YCL038C	ATG22	multi-core-promoter	NA	constitutive,inducible	Glc
YCL039W	GID7	multi-core-promoter	NA	constitutive,inducible	Arrest,DD,DSA,Gal,Glc,HS,NaCl
YCL040W	GLK1	multi-core-promoter	NA	constitutive,inducible	DSA,Gal,Glc,HS
YCL041C	NA	multi-core-promoter	NA	inducible,inducible	NA
YCL042W	NA	multi-core-promoter	NA	constitutive,inducible	NA
YCL043C	PDI1	multi-core-promoter	NA	constitutive,inducible,inducible,constitutive	Arrest,DD,H2O2,HS,NaCl
YCL044C	MGR1	multi-core-promoter	NA	constitutive,inducible	HS
YCL045C	EMC1	multi-core-promoter	NA	constitutive,inducible	DSA,HS
YCL047C	POF1	single-core-promoter	NA	constitutive	NA
YCL048W	SPS22	single-core-promoter	NA	inducible	NA
YCL048W-A	NA	multi-core-promoter	NA	constitutive,inducible,inducible,inducible	Arrest,DSA,Gal,NaCl
YCL049C	NA	multi-core-promoter	NA	constitutive,inducible,inducible,inducible,constitutive	Arrest,DD,DSA,H2O2,HS
YCL050C	APA1	multi-core-promoter	NA	constitutive,inducible,constitutive	Arrest,DSA,Gal
YCL051W	LRE1	multi-core-promoter	NA	inducible,inducible,constitutive,inducible	HS
YCL052C	PBN1	multi-core-promoter	NA	constitutive,inducible	NA
YCL054W	SPB1	single-core-promoter	NA	constitutive	NA
YCL054W-A	RDT1	multi-core-promoter	NA	constitutive,constitutive	Arrest,DSA,NaCl
YCL055W	KAR4	single-core-promoter	NA	constitutive	NA
YCL056C	PEX34	multi-core-promoter	NA	constitutive,inducible	Arrest
YCL057C-A	MIC10	multi-core-promoter	NA	constitutive,constitutive	Glc,HS
YCL057W	PRD1	multi-core-promoter	NA	constitutive,inducible,inducible	DSA,Gal,HS
YCL058C	FYV5	single-core-promoter	NA	inducible	NA
YCL058W-A	ADF1	single-core-promoter	NA	constitutive	NA
YCL059C	KRR1	single-core-promoter	NA	constitutive	NA
YCL061C	MRC1	single-core-promoter	NA	constitutive	NA
YCL063W	VAC17	multi-core-promoter	NA	constitutive,inducible	DSA,HS
YCL064C	CHA1	single-core-promoter	NA	constitutive	NA
YCL076W	NA	single-core-promoter	NA	inducible	NA
YCR002C	CDC10	single-core-promoter	NA	constitutive	NA
YCR003W	MRPL32	single-core-promoter	NA	constitutive	NA
YCR004C	YCP4	multi-core-promoter	NA	constitutive,constitutive	NA
YCR005C	CIT2	single-core-promoter	NA	constitutive	NA
YCR006C	NA	multi-core-promoter	NA	inducible,constitutive,inducible,inducible	Arrest,DD,DSA,Glc,HS
YCR007C	DUP240%20family%20protein	multi-core-promoter	NA	constitutive,inducible,constitutive,inducible,inducible,constitutive	Arrest,DSA,H2O2,HS
YCR008W	SAT4	single-core-promoter	NA	constitutive	NA
YCR009C	RVS161	multi-core-promoter	NA	constitutive,inducible,constitutive,inducible	Arrest,DSA,Gal,Glc,HS
YCR010C	ADY2	multi-core-promoter	NA	constitutive,inducible,constitutive,inducible	DSA,Gal,Glc,H2O2
YCR011C	ADP1	multi-core-promoter	NA	constitutive,inducible	Arrest,HS
YCR012W	PGK1	single-core-promoter	NA	constitutive	NA
YCR014C	POL4	single-core-promoter	NA	inducible	NA
YCR015C	CTO1	single-core-promoter	NA	constitutive	NA
YCR016W	NA	multi-core-promoter	NA	constitutive,inducible	HS
YCR017C	CWH43	multi-core-promoter	NA	constitutive,inducible	Arrest,DSA,HS
YCR018C-A	NA	multi-core-promoter	NA	inducible,inducible,inducible,inducible	NA
YCR019W	MAK32	multi-core-promoter	NA	constitutive,inducible,inducible,constitutive	Arrest
YCR020C	PET18	multi-core-promoter	NA	constitutive,inducible	NA
YCR020C-A	MAK31	single-core-promoter	NA	constitutive	NA
YCR020W-B	HTL1	multi-core-promoter	NA	constitutive,inducible,inducible	NA
YCR021C	HSP30	multi-core-promoter	NA	constitutive,inducible,inducible	Arrest,NaCl
YCR023C	NA	multi-core-promoter	NA	constitutive,inducible,inducible	DD,DSA,Glc,H2O2,HS,NaCl
YCR024C	SLM5	multi-core-promoter	NA	constitutive,constitutive,inducible	Arrest,DD,DSA,Glc,H2O2,HS
YCR024C-A	PMP1	single-core-promoter	NA	constitutive	NA
YCR025C	NA	multi-core-promoter	NA	inducible,inducible	NA
YCR026C	NPP1	multi-core-promoter	NA	constitutive,constitutive	Gal,HS,NaCl
YCR027C	RHB1	multi-core-promoter	NA	constitutive,inducible,inducible	Gal,HS
YCR028C	FEN2	single-core-promoter	NA	constitutive	NA
YCR028C-A	RIM1	single-core-promoter	NA	constitutive	NA
YCR030C	SYP1	multi-core-promoter	NA	constitutive,constitutive,inducible,inducible	DD,DSA,H2O2
YCR031C	RPS14A	multi-core-promoter	NA	constitutive,inducible	DSA,Gal,HS,NaCl
YCR032W	BPH1	multi-core-promoter	NA	constitutive,inducible	DD,DSA,Gal,Glc,H2O2
YCR033W	SNT1	multi-core-promoter	NA	inducible,constitutive	NA
YCR034W	ELO2	multi-core-promoter	NA	constitutive,inducible	HS
YCR035C	RRP43	multi-core-promoter	NA	constitutive,inducible,inducible	NA
YCR036W	RBK1	multi-core-promoter	NA	constitutive,inducible	Arrest
YCR037C	PHO87	single-core-promoter	NA	constitutive	NA
YCR038C	BUD5	single-core-promoter	I	constitutive	NA
YCR042C	TAF2	multi-core-promoter	NA	constitutive,inducible	NA
YCR043C	NA	single-core-promoter	NA	constitutive	NA
YCR044C	PER1	single-core-promoter	NA	constitutive	NA
YCR045C	RRT12	multi-core-promoter	NA	inducible,inducible	NA
YCR045W-A	NA	multi-core-promoter	NA	inducible,inducible,constitutive	NA
YCR046C	IMG1	multi-core-promoter	NA	constitutive,inducible	DD,DSA,NaCl
YCR047C	BUD23	multi-core-promoter	NA	constitutive,inducible	Gal,HS
YCR047W-A	NA	multi-core-promoter	NA	inducible,inducible,inducible	NA
YCR048W	ARE1	multi-core-promoter	NA	constitutive,inducible,inducible	DSA,HS
YCR050C	NA	single-core-promoter	NA	inducible	NA
YCR051W	NA	single-core-promoter	NA	constitutive	NA
YCR052W	RSC6	multi-core-promoter	NA	constitutive,inducible	NA
YCR053W	THR4	single-core-promoter	NA	constitutive	NA
YCR054C	CTR86	single-core-promoter	NA	constitutive	NA
YCR057C	PWP2	multi-core-promoter	NA	constitutive,inducible	DSA
YCR059C	YIH1	multi-core-promoter	NA	constitutive,inducible,constitutive	DD,DSA,Glc,H2O2,HS,NaCl
YCR060W	TAH1	multi-core-promoter	NA	constitutive,constitutive	DD,H2O2
YCR061W	YCR062W	multi-core-promoter	NA	constitutive,inducible,inducible	HS
YCR063W	BUD31	multi-core-promoter	NA	constitutive,inducible,inducible	DD,DSA,Glc,H2O2,HS
YCR064C	NA	multi-core-promoter	NA	inducible,inducible	NA
YCR065W	HCM1	single-core-promoter	NA	constitutive	NA
YCR066W	RAD18	single-core-promoter	NA	constitutive	NA
YCR067C	SED4	multi-core-promoter	NA	constitutive,constitutive,inducible	H2O2,HS
YCR068W	ATG15	multi-core-promoter	NA	constitutive,constitutive,constitutive,inducible	DD,DSA,Gal,Glc,H2O2,HS,NaCl
YCR069W	CPR4	multi-core-promoter	NA	constitutive,inducible,inducible	Gal,HS
YCR071C	IMG2	multi-core-promoter	NA	constitutive,inducible	HS
YCR072C	RSA4	single-core-promoter	NA	constitutive	NA
YCR073C	SSK22	single-core-promoter	NA	constitutive	NA
YCR073W-A	SOL2	single-core-promoter	NA	constitutive	NA
YCR075C	ERS1	multi-core-promoter	NA	constitutive,inducible	NaCl
YCR075W-A	EGO2	single-core-promoter	NA	constitutive	NA
YCR076C	FUB1	single-core-promoter	NA	constitutive	NA
YCR077C	PAT1	multi-core-promoter	NA	constitutive,inducible,inducible	DD,DSA,Glc,HS,NaCl
YCR079W	PTC6	multi-core-promoter	NA	constitutive,inducible	NA
YCR081C-A	NA	single-core-promoter	NA	inducible	NA
YCR081W	SRB8	single-core-promoter	NA	constitutive	NA
YCR082W	AHC2	multi-core-promoter	NA	constitutive,inducible	NA
YCR083W	TRX3	multi-core-promoter	NA	constitutive,inducible,inducible	NA
YCR084C	TUP1	multi-core-promoter	NA	constitutive,constitutive,inducible	DD,Glc,H2O2,HS,NaCl
YCR086W	CSM1	multi-core-promoter	NA	constitutive,inducible,inducible	DSA
YCR087C-A	LUG1	multi-core-promoter	NA	constitutive,inducible	Arrest,DSA,Gal,Glc,HS,NaCl
YCR087W	NA	multi-core-promoter	NA	constitutive,constitutive	NA
YCR088W	ABP1	multi-core-promoter	NA	constitutive,inducible	DD
YCR089W	FIG2	multi-core-promoter	NA	inducible,inducible	Arrest,DD,DSA,Glc,H2O2,HS
YCR090C	NA	single-core-promoter	NA	constitutive	NA
YCR091W	KIN82	multi-core-promoter	NA	constitutive,inducible,inducible,inducible,inducible	Gal
YCR092C	MSH3	multi-core-promoter	NA	constitutive,inducible,inducible	DSA,HS
YCR093W	CDC39	single-core-promoter	NA	constitutive	NA
YCR094W	CDC50	single-core-promoter	NA	constitutive	NA
YCR095C	OCA4	multi-core-promoter	NA	constitutive,inducible	DSA,HS
YCR095W-A	NA	single-core-promoter	NA	constitutive	NA
YCR096C	HMRA2	multi-core-promoter	NA	constitutive,inducible,inducible,inducible	NA
YCR097W	HMRA1	single-core-promoter	NA	constitutive	NA
YCR097W-A	NA	single-core-promoter	NA	inducible	NA
YCR098C	GIT1	multi-core-promoter	NA	inducible,inducible	NA
YCR100C	NA	multi-core-promoter	NA	inducible,inducible	NA
YCR101C	NA	multi-core-promoter	NA	inducible,constitutive,inducible	Arrest,DD,DSA,NaCl
YCR102C	NA	multi-core-promoter	NA	inducible,inducible	NA
YCR102W-A	NA	single-core-promoter	NA	inducible	NA
YCR104W	PAU3	single-core-promoter	NA	inducible	NA
YCR106W	RDS1	multi-core-promoter	NA	constitutive,constitutive	Arrest,DD,DSA,H2O2,HS
YDL001W	RMD1	single-core-promoter	NA	constitutive	NA
YDL002C	NHP10	multi-core-promoter	NA	constitutive,inducible	Gal,Glc,H2O2,HS
YDL003W	MCD1	multi-core-promoter	NA	constitutive,inducible	DD,Glc,HS
YDL004W	ATP16	multi-core-promoter	NA	constitutive,inducible,inducible	NA
YDL005C	MED2	single-core-promoter	NA	constitutive	NA
YDL006W	PTC1	multi-core-promoter	NA	inducible,constitutive	NA
YDL007C-A	NA	single-core-promoter	NA	inducible	NA
YDL007W	RPT2	single-core-promoter	NA	constitutive	NA
YDL008W	APC11	multi-core-promoter	NA	constitutive,inducible	HS
YDL009C	NA	multi-core-promoter	NA	inducible,inducible,inducible	Gal
YDL010W	GRX6	multi-core-promoter	NA	constitutive,inducible,constitutive,inducible	DSA,Gal,HS
YDL011C	NA	single-core-promoter	NA	inducible	NA
YDL012C	NA	multi-core-promoter	NA	constitutive,constitutive,constitutive	HS,NaCl
YDL013W	SLX5	single-core-promoter	NA	constitutive	NA
YDL014W	NOP1	single-core-promoter	NA	constitutive	NA
YDL015C	TSC13	multi-core-promoter	NA	constitutive,inducible	DSA,Glc,HS
YDL016C	NA	single-core-promoter	NA	inducible	NA
YDL017W	CDC7	multi-core-promoter	NA	constitutive,inducible	DD,DSA,Gal,Glc,H2O2,HS
YDL018C	ERP3	multi-core-promoter	NA	constitutive,inducible	Arrest,DD,Glc,NaCl
YDL019C	OSH2	single-core-promoter	NA	constitutive	NA
YDL020C	RPN4	multi-core-promoter	NA	constitutive,inducible	NA
YDL021W	GPM2	multi-core-promoter	NA	constitutive,inducible,inducible,inducible,inducible	Arrest,DD,DSA,H2O2,NaCl
YDL022C-A	NA	multi-core-promoter	NA	constitutive,inducible,inducible	NA
YDL022W	GPD1	multi-core-promoter	NA	constitutive,inducible	Glc,HS
YDL024C	DIA3	single-core-promoter	NA	constitutive	NA
YDL025C	RTK1	multi-core-promoter	NA	constitutive,inducible,inducible	HS
YDL025W-A	NA	single-core-promoter	NA	inducible	NA
YDL026W	NA	multi-core-promoter	NA	inducible,inducible	NA
YDL027C	MRX9	multi-core-promoter	NA	constitutive,inducible,inducible	Glc,HS
YDL028C	MPS1	single-core-promoter	NA	constitutive	NA
YDL029W	ARP2	single-core-promoter	NA	constitutive	NA
YDL030W	PRP9	single-core-promoter	NA	constitutive	NA
YDL031W	DBP10	single-core-promoter	NA	constitutive	NA
YDL032W	NA	single-core-promoter	NA	inducible	NA
YDL033C	SLM3	single-core-promoter	NA	constitutive	NA
YDL034W	NA	single-core-promoter	NA	inducible	NA
YDL035C	GPR1	multi-core-promoter	NA	inducible,inducible,constitutive	DD,H2O2,HS,NaCl
YDL036C	PUS9	single-core-promoter	NA	constitutive	NA
YDL037C	BSC1	single-core-promoter	NA	inducible	NA
YDL040C	NAT1	single-core-promoter	NA	constitutive	NA
YDL041W	NA	single-core-promoter	NA	inducible	NA
YDL042C	SIR2	single-core-promoter	NA	constitutive	NA
YDL043C	PRP11	single-core-promoter	NA	constitutive	NA
YDL044C	MTF2	single-core-promoter	NA	constitutive	NA
YDL045C	FAD1	single-core-promoter	NA	constitutive	NA
YDL045W-A	MRP10	single-core-promoter	NA	constitutive	NA
YDL046W	NPC2	multi-core-promoter	NA	constitutive,inducible,inducible	Arrest,DD,Glc,HS
YDL047W	SIT4	multi-core-promoter	NA	constitutive,constitutive,constitutive,constitutive,inducible	Glc
YDL048C	STP4	multi-core-promoter	NA	constitutive,inducible,constitutive,inducible	Arrest,DD,HS
YDL049C	KNH1	multi-core-promoter	II	constitutive,inducible,inducible	DD,DSA,Gal,H2O2,HS,NaCl
YDL051W	LHP1	multi-core-promoter	NA	constitutive,inducible,inducible	DSA,Gal,HS,NaCl
YDL052C	SLC1	single-core-promoter	NA	constitutive	NA
YDL053C	PBP4	multi-core-promoter	NA	constitutive,constitutive,inducible	Arrest,DD,DSA,Gal,Glc,H2O2,HS,NaCl
YDL054C	MCH1	multi-core-promoter	NA	constitutive,inducible,inducible	DD,NaCl
YDL055C	PSA1	multi-core-promoter	NA	constitutive,inducible	DD,DSA,Glc,HS
YDL056W	MBP1	single-core-promoter	NA	constitutive	NA
YDL057W	NA	single-core-promoter	NA	constitutive	NA
YDL058W	USO1	single-core-promoter	NA	constitutive	NA
YDL059C	RAD59	single-core-promoter	NA	constitutive	NA
YDL060W	TSR1	multi-core-promoter	NA	constitutive,inducible	HS
YDL061C	RPS29B	multi-core-promoter	NA	inducible,constitutive	Arrest,DSA,Glc
YDL063C	SYO1	single-core-promoter	NA	constitutive	NA
YDL064W	UBC9	single-core-promoter	NA	constitutive	NA
YDL065C	PEX19	single-core-promoter	NA	constitutive	NA
YDL066W	IDP1	multi-core-promoter	NA	constitutive,inducible,inducible,inducible	DSA,Gal,NaCl
YDL067C	COX9	multi-core-promoter	NA	constitutive,constitutive	H2O2,HS,NaCl
YDL069C	CBS1	single-core-promoter	NA	constitutive	NA
YDL070W	BDF2	multi-core-promoter	NA	constitutive,inducible,constitutive	Glc,HS
YDL072C	YET3	multi-core-promoter	NA	constitutive,inducible,constitutive	DD,H2O2,HS
YDL073W	AHK1	single-core-promoter	NA	constitutive	NA
YDL074C	BRE1	single-core-promoter	NA	constitutive	NA
YDL075W	RPL31A	multi-core-promoter	NA	constitutive,inducible,inducible	DSA,Gal
YDL076C	RXT3	multi-core-promoter	NA	constitutive,inducible	NaCl
YDL077C	VAM6	single-core-promoter	NA	constitutive	NA
YDL078C	MDH3	multi-core-promoter	NA	constitutive,inducible	DSA,HS
YDL079C	MRK1	multi-core-promoter	NA	constitutive,inducible	Arrest,DSA,Gal,Glc,H2O2,HS
YDL080C	THI3	multi-core-promoter	NA	constitutive,constitutive	Arrest,DD,Gal,Glc,HS
YDL081C	RPP1A	single-core-promoter	NA	constitutive	NA
YDL082W	RPL13A	multi-core-promoter	NA	constitutive,inducible,inducible	DSA,Glc,HS
YDL083C	RPS16B	multi-core-promoter	NA	constitutive,inducible,inducible	DSA,Glc,HS
YDL084W	SUB2	single-core-promoter	NA	constitutive	NA
YDL085C-A	NA	single-core-promoter	NA	constitutive	NA
YDL085W	NDE2	multi-core-promoter	NA	constitutive,inducible	DD,DSA,Gal,H2O2,HS,NaCl
YDL086C-A	NA	single-core-promoter	NA	constitutive	NA
YDL086W	carboxymethylenebutenolidase	single-core-promoter	NA	constitutive	NA
YDL087C	LUC7	multi-core-promoter	NA	constitutive,constitutive	DSA
YDL088C	ASM4	multi-core-promoter	NA	constitutive,inducible	Arrest,DD,DSA,Gal,Glc,H2O2,HS,NaCl
YDL089W	NUR1	single-core-promoter	NA	constitutive	NA
YDL090C	RAM1	multi-core-promoter	NA	constitutive,inducible	Arrest,DD,Glc
YDL091C	UBX3	single-core-promoter	NA	constitutive	NA
YDL092W	SRP14	single-core-promoter	NA	constitutive	NA
YDL093W	PMT5	single-core-promoter	NA	constitutive	NA
YDL094C	NA	multi-core-promoter	NA	inducible,inducible	NA
YDL095W	PMT1	multi-core-promoter	NA	constitutive,inducible,inducible,inducible	DSA,Glc,HS,NaCl
YDL096C	OPI6	single-core-promoter	NA	inducible	NA
YDL097C	RPN6	single-core-promoter	NA	constitutive	NA
YDL098C	SNU23	single-core-promoter	NA	constitutive	NA
YDL099W	BUG1	single-core-promoter	NA	constitutive	NA
YDL100C	GET3	multi-core-promoter	NA	constitutive,inducible	Gal,NaCl
YDL101C	DUN1	multi-core-promoter	NA	constitutive,inducible	NA
YDL102W	POL3	single-core-promoter	NA	constitutive	NA
YDL103C	QRI1	single-core-promoter	NA	constitutive	NA
YDL104C	QRI7	single-core-promoter	NA	constitutive	NA
YDL105W	NSE4	multi-core-promoter	NA	constitutive,constitutive,inducible	HS
YDL106C	PHO2	multi-core-promoter	NA	constitutive,inducible	DSA
YDL107W	MSS2	multi-core-promoter	II	constitutive,constitutive	NA
YDL108W	KIN28	multi-core-promoter	II	constitutive,inducible	NA
YDL109C	putative%20lipase	multi-core-promoter	NA	constitutive,constitutive,inducible,inducible	DD,DSA,Gal,Glc,H2O2,HS,NaCl
YDL110C	TMA17	multi-core-promoter	NA	constitutive,inducible,inducible	Arrest,DD,DSA,NaCl
YDL111C	RRP42	multi-core-promoter	NA	constitutive,inducible	NaCl
YDL112W	TRM3	multi-core-promoter	NA	constitutive,inducible	DSA,Gal,HS
YDL113C	ATG20	single-core-promoter	NA	constitutive	NA
YDL114W	short-chain%20dehydrogenase%2Freductase	single-core-promoter	NA	inducible	NA
YDL114W-A	NA	single-core-promoter	NA	inducible	NA
YDL115C	IWR1	multi-core-promoter	NA	constitutive,inducible	Glc,H2O2
YDL116W	NUP84	single-core-promoter	NA	constitutive	NA
YDL117W	CYK3	multi-core-promoter	NA	constitutive,inducible,constitutive,inducible	DD,DSA,Glc,H2O2,HS,NaCl
YDL119C	HEM25	multi-core-promoter	NA	constitutive,inducible	Arrest,DD,DSA,Glc,H2O2,HS
YDL120W	YFH1	single-core-promoter	NA	constitutive	NA
YDL121C	NA	multi-core-promoter	NA	constitutive,inducible	DSA,Gal,HS
YDL122W	UBP1	multi-core-promoter	NA	constitutive,constitutive	Arrest,DD,DSA,Gal,Glc,H2O2,HS,NaCl
YDL123W	SNA4	multi-core-promoter	NA	constitutive,constitutive,inducible	DSA,Gal,Glc,HS,NaCl
YDL124W	aldo-keto%20reductase%20superfamily%20protein	multi-core-promoter	NA	constitutive,inducible,inducible	DD,Gal,H2O2
YDL125C	HNT1	multi-core-promoter	NA	constitutive,inducible,constitutive	DSA,HS,NaCl
YDL126C	CDC48	multi-core-promoter	NA	constitutive,inducible,inducible,inducible	DSA,Gal,Glc,HS
YDL127W	PCL2	multi-core-promoter	NA	constitutive,inducible,inducible,inducible	Arrest,DD,Gal,Glc,H2O2,HS
YDL128W	VCX1	single-core-promoter	NA	constitutive	NA
YDL129W	NA	multi-core-promoter	NA	constitutive,inducible	HS
YDL130W	RPP1B	single-core-promoter	NA	constitutive	NA
YDL130W-A	STF1	multi-core-promoter	NA	constitutive,inducible	Arrest,DD,Gal,Glc,HS,NaCl
YDL131W	LYS21	multi-core-promoter	NA	constitutive,inducible	NaCl
YDL132W	CDC53	multi-core-promoter	NA	inducible,constitutive	Arrest,DD,DSA,Glc,H2O2,HS,NaCl
YDL133C-A	RPL41B	multi-core-promoter	NA	constitutive,inducible,constitutive	Arrest,DD,DSA,Gal,Glc,HS,NaCl
YDL133W	SRF1	multi-core-promoter	NA	constitutive,constitutive	Arrest,DD,DSA,H2O2,HS
YDL134C	PPH21	multi-core-promoter	NA	constitutive,constitutive,constitutive,inducible	Arrest,DD,DSA,Gal,Glc,H2O2,HS,NaCl
YDL135C	RDI1	multi-core-promoter	NA	constitutive,inducible	Arrest
YDL136W	RPL35B	single-core-promoter	NA	constitutive	NA
YDL137W	ARF2	multi-core-promoter	NA	inducible,constitutive,inducible,inducible,inducible	DD,Gal,Glc,HS,NaCl
YDL138W	RGT2	multi-core-promoter	NA	constitutive,inducible	NA
YDL139C	SCM3	multi-core-promoter	NA	constitutive,constitutive,inducible,inducible	DD,DSA,Glc,H2O2,HS
YDL140C	RPO21	multi-core-promoter	NA	inducible,constitutive,constitutive,constitutive	NaCl
YDL141W	BPL1	multi-core-promoter	NA	constitutive,constitutive,inducible	DD,DSA,Glc,H2O2,HS,NaCl
YDL142C	CRD1	single-core-promoter	NA	constitutive	NA
YDL143W	CCT4	single-core-promoter	NA	constitutive	NA
YDL144C	NA	single-core-promoter	NA	constitutive	NA
YDL145C	COP1	single-core-promoter	NA	constitutive	NA
YDL146W	LDB17	single-core-promoter	NA	constitutive	NA
YDL147W	RPN5	single-core-promoter	NA	constitutive	NA
YDL148C	NOP14	single-core-promoter	NA	constitutive	NA
YDL149W	ATG9	single-core-promoter	NA	constitutive	NA
YDL150W	RPC53	multi-core-promoter	NA	constitutive,inducible	DSA,HS
YDL153C	SAS10	multi-core-promoter	NA	constitutive,inducible	DSA,Gal,HS
YDL155W	CLB3	multi-core-promoter	NA	constitutive,inducible	NA
YDL156W	CMR1	single-core-promoter	NA	constitutive	NA
YDL157C	NA	multi-core-promoter	NA	constitutive,inducible	DSA,Gal,HS,NaCl
YDL158C	NA	multi-core-promoter	NA	inducible,inducible	NA
YDL159W	STE7	single-core-promoter	NA	constitutive	NA
YDL159W-A	YDL159W-B	multi-core-promoter	NA	inducible,inducible	NA
YDL160C	DHH1	multi-core-promoter	NA	constitutive,constitutive,inducible	Arrest,DD,DSA,Gal,Glc,H2O2,HS,NaCl
YDL160C-A	MHF2	multi-core-promoter	NA	constitutive,constitutive	DD,DSA,HS
YDL161W	ENT1	multi-core-promoter	NA	constitutive,inducible	NA
YDL164C	CDC9	multi-core-promoter	NA	constitutive,inducible	DSA,Gal
YDL165W	CDC36	multi-core-promoter	NA	constitutive,inducible	DD
YDL166C	FAP7	single-core-promoter	NA	constitutive	NA
YDL167C	NRP1	single-core-promoter	NA	constitutive	NA
YDL168W	SFA1	multi-core-promoter	NA	constitutive,inducible	DSA
YDL169C	UGX2	multi-core-promoter	NA	constitutive,inducible,inducible	Gal
YDL170W	UGA3	multi-core-promoter	NA	constitutive,inducible	NA
YDL171C	GLT1	multi-core-promoter	NA	constitutive,constitutive	DD,DSA,Gal,Glc,H2O2,HS
YDL172C	NA	single-core-promoter	NA	inducible	NA
YDL173W	PAR32	multi-core-promoter	NA	constitutive,inducible,inducible	DD,DSA,Gal,HS
YDL174C	DLD1	multi-core-promoter	NA	constitutive,constitutive,inducible	Gal,Glc,H2O2,NaCl
YDL175C	AIR2	single-core-promoter	NA	constitutive	NA
YDL176W	NA	single-core-promoter	NA	constitutive	NA
YDL177C	NA	single-core-promoter	NA	constitutive	NA
YDL178W	DLD2	single-core-promoter	NA	constitutive	NA
YDL179W	PCL9	multi-core-promoter	NA	constitutive,constitutive	Arrest,DSA
YDL180W	NA	multi-core-promoter	NA	constitutive,inducible,inducible	NA
YDL181W	INH1	multi-core-promoter	NA	constitutive,inducible	Gal,HS,NaCl
YDL182W	LYS20	single-core-promoter	NA	constitutive	NA
YDL183C	MKR1	multi-core-promoter	NA	constitutive,inducible,inducible,inducible,constitutive,inducible	Arrest
YDL184C	RPL41A	single-core-promoter	NA	constitutive	NA
YDL185W	VMA1	single-core-promoter	NA	constitutive	NA
YDL187C	NA	single-core-promoter	NA	constitutive	NA
YDL188C	PPH22	single-core-promoter	NA	constitutive	NA
YDL189W	RBS1	multi-core-promoter	NA	constitutive,constitutive,inducible	DD,DSA,Glc,H2O2,HS
YDL190C	UFD2	single-core-promoter	NA	constitutive	NA
YDL191W	RPL35A	multi-core-promoter	NA	constitutive,inducible	DSA,Gal,Glc,HS,NaCl
YDL192W	ARF1	single-core-promoter	NA	constitutive	NA
YDL193W	NUS1	single-core-promoter	NA	constitutive	NA
YDL194W	SNF3	single-core-promoter	NA	constitutive	NA
YDL195W	SEC31	single-core-promoter	NA	constitutive	NA
YDL196W	NA	multi-core-promoter	NA	constitutive,inducible	DSA,HS
YDL197C	ASF2	multi-core-promoter	NA	constitutive,constitutive,inducible	DD,Glc,H2O2
YDL198C	GGC1	single-core-promoter	NA	constitutive	NA
YDL199C	NA	single-core-promoter	NA	constitutive	NA
YDL200C	MGT1	single-core-promoter	NA	constitutive	NA
YDL201W	TRM8	single-core-promoter	NA	constitutive	NA
YDL202W	MRPL11	single-core-promoter	NA	constitutive	NA
YDL203C	ACK1	multi-core-promoter	NA	inducible,constitutive	DD,DSA,Glc,H2O2,HS
YDL204W	RTN2	multi-core-promoter	NA	constitutive,constitutive	Arrest,Gal,H2O2,NaCl
YDL205C	HEM3	multi-core-promoter	NA	constitutive,inducible,inducible	Arrest,DSA,Gal,NaCl
YDL206W	NA	single-core-promoter	NA	constitutive	NA
YDL207W	GLE1	multi-core-promoter	NA	constitutive,inducible	Arrest,DD,DSA,Gal,Glc,H2O2,HS,NaCl
YDL208W	NHP2	multi-core-promoter	NA	constitutive,inducible	DSA,Glc,HS
YDL209C	CWC2	single-core-promoter	NA	constitutive	NA
YDL210W	UGA4	single-core-promoter	NA	inducible	NA
YDL211C	NA	single-core-promoter	NA	constitutive	NA
YDL212W	SHR3	multi-core-promoter	NA	constitutive,inducible	HS
YDL213C	NOP6	multi-core-promoter	NA	constitutive,constitutive,inducible	Arrest,DSA,Gal,HS,NaCl
YDL214C	PRR2	multi-core-promoter	NA	inducible,constitutive,constitutive,inducible,inducible	Glc,H2O2
YDL215C	GDH2	multi-core-promoter	NA	constitutive,inducible	Arrest,HS
YDL216C	RRI1	single-core-promoter	NA	constitutive	NA
YDL217C	TIM22	single-core-promoter	NA	constitutive	NA
YDL218W	NA	multi-core-promoter	NA	inducible,inducible,inducible	NA
YDL219W	DTD1	single-core-promoter	NA	constitutive	NA
YDL220C	CDC13	multi-core-promoter	NA	constitutive,constitutive	DD,Gal
YDL221W	NA	multi-core-promoter	NA	inducible,inducible,inducible,inducible,inducible	NA
YDL222C	FMP45	multi-core-promoter	NA	constitutive,inducible,inducible,constitutive,inducible	Arrest,DSA,Gal,H2O2
YDL223C	HBT1	single-core-promoter	NA	constitutive	NA
YDL224C	WHI4	multi-core-promoter	NA	inducible,constitutive	DD,DSA,Gal,Glc,HS,NaCl
YDL225W	SHS1	single-core-promoter	NA	constitutive	NA
YDL226C	GCS1	single-core-promoter	NA	constitutive	NA
YDL227C	HO	multi-core-promoter	NA	inducible,inducible,inducible,inducible	DSA,Glc,HS,NaCl
YDL229W	SSB1	single-core-promoter	NA	constitutive	NA
YDL230W	PTP1	multi-core-promoter	NA	constitutive,inducible	HS,NaCl
YDL231C	BRE4	single-core-promoter	NA	constitutive	NA
YDL232W	OST4	multi-core-promoter	NA	constitutive,inducible	HS
YDL233W	MFG1	single-core-promoter	NA	constitutive	NA
YDL234C	GYP7	single-core-promoter	NA	constitutive	NA
YDL235C	YPD1	multi-core-promoter	NA	constitutive,inducible	NA
YDL236W	PHO13	single-core-promoter	NA	constitutive	NA
YDL237W	AIM6	multi-core-promoter	NA	constitutive,inducible,inducible	DSA,HS
YDL238C	GUD1	multi-core-promoter	NA	constitutive,inducible	HS
YDL239C	ADY3	multi-core-promoter	NA	inducible,inducible,inducible	NA
YDL240W	LRG1	multi-core-promoter	NA	constitutive,inducible,inducible,inducible	DSA
YDL241W	NA	multi-core-promoter	NA	constitutive,constitutive	Glc,NaCl
YDL243C	AAD4	multi-core-promoter	NA	inducible,constitutive,inducible,constitutive	DD,Gal,Glc,H2O2,NaCl
YDL248W	COS7	single-core-promoter	NA	constitutive	NA
YDR001C	NTH1	single-core-promoter	NA	constitutive	NA
YDR002W	YRB1	multi-core-promoter	NA	constitutive,constitutive	DSA,Glc,HS
YDR003W	RCR2	multi-core-promoter	NA	constitutive,inducible	NA
YDR003W-A	NA	single-core-promoter	NA	inducible	NA
YDR004W	RAD57	multi-core-promoter	II	constitutive,inducible	Arrest,DD,DSA,NaCl
YDR005C	MAF1	multi-core-promoter	NA	inducible,constitutive	NA
YDR006C	SOK1	multi-core-promoter	NA	constitutive,inducible,inducible	NA
YDR007W	TRP1	multi-core-promoter	NA	constitutive,constitutive	Arrest,Glc,H2O2
YDR008C	NA	multi-core-promoter	NA	inducible,inducible	NA
YDR009W	GAL3	multi-core-promoter	NA	constitutive,inducible	NA
YDR010C	NA	single-core-promoter	NA	inducible	NA
YDR011W	SNQ2	multi-core-promoter	NA	constitutive,constitutive	NA
YDR012W	RPL4B	multi-core-promoter	NA	constitutive,inducible,constitutive	DSA,Gal,Glc,HS
YDR013W	PSF1	single-core-promoter	NA	constitutive	NA
YDR014W	RAD61	multi-core-promoter	NA	constitutive,inducible	NA
YDR014W-A	HED1	single-core-promoter	III	constitutive	NA
YDR016C	DAD1	single-core-promoter	NA	constitutive	NA
YDR017C	KCS1	single-core-promoter	III	constitutive	NA
YDR018C	putative%20acyltransferase	single-core-promoter	NA	constitutive	NA
YDR019C	GCV1	multi-core-promoter	NA	constitutive,inducible,inducible	DSA,Gal,HS,NaCl
YDR020C	DAS2	single-core-promoter	NA	constitutive	NA
YDR021W	FAL1	multi-core-promoter	NA	constitutive,inducible	DD,Gal
YDR022C	ATG31	multi-core-promoter	NA	constitutive,constitutive	Arrest,DD,DSA,H2O2,HS
YDR023W	SES1	single-core-promoter	NA	constitutive	NA
YDR025W	RPS11A	multi-core-promoter	NA	constitutive,inducible,inducible	DSA,Gal,HS,NaCl
YDR026C	NSI1	single-core-promoter	NA	constitutive	NA
YDR027C	VPS54	single-core-promoter	NA	constitutive	NA
YDR028C	REG1	multi-core-promoter	NA	constitutive,constitutive,constitutive,constitutive	Arrest,Glc,NaCl
YDR030C	RAD28	single-core-promoter	NA	constitutive	NA
YDR031W	MIX14	multi-core-promoter	NA	constitutive,inducible	HS,NaCl
YDR032C	PST2	single-core-promoter	NA	constitutive	NA
YDR033W	MRH1	multi-core-promoter	NA	constitutive,constitutive	Arrest,DD,DSA,Gal,Glc,H2O2,NaCl
YDR034C	LYS14	multi-core-promoter	NA	constitutive,inducible,constitutive	DD,DSA,Gal,Glc,H2O2,HS
YDR034C-A	NA	multi-core-promoter	NA	inducible,inducible,inducible	NA
YDR034W-B	NA	multi-core-promoter	NA	constitutive,constitutive	Gal,Glc,NaCl
YDR035W	ARO3	multi-core-promoter	NA	constitutive,inducible,inducible	Gal,HS,NaCl
YDR036C	EHD3	multi-core-promoter	NA	constitutive,inducible,inducible,inducible	Arrest,DSA,HS
YDR037W	KRS1	multi-core-promoter	NA	constitutive,constitutive,inducible	DSA,Gal
YDR040C	ENA1	multi-core-promoter	NA	constitutive,inducible,inducible,inducible	DSA,Gal,Glc,H2O2,HS,NaCl
YDR041W	RSM10	multi-core-promoter	NA	constitutive,inducible,inducible	Glc,NaCl
YDR042C	NA	single-core-promoter	NA	constitutive	NA
YDR043C	NRG1	multi-core-promoter	NA	constitutive,inducible,inducible	DSA
YDR044W	HEM13	multi-core-promoter	NA	constitutive,constitutive	Arrest,H2O2
YDR045C	RPC11	single-core-promoter	NA	constitutive	NA
YDR046C	BAP3	multi-core-promoter	NA	constitutive,constitutive,inducible	DD,H2O2,HS
YDR047W	HEM12	multi-core-promoter	NA	constitutive,constitutive,inducible	Gal
YDR048C	NA	single-core-promoter	NA	inducible	NA
YDR049W	VMS1	single-core-promoter	NA	constitutive	NA
YDR050C	TPI1	single-core-promoter	NA	constitutive	NA
YDR051C	DET1	multi-core-promoter	NA	constitutive,inducible	Glc,HS
YDR052C	DBF4	multi-core-promoter	NA	constitutive,inducible	Arrest,DD,DSA,Gal,Glc,HS
YDR053W	NA	single-core-promoter	NA	inducible	NA
YDR054C	CDC34	multi-core-promoter	NA	constitutive,inducible,inducible	DD,Glc,H2O2
YDR055W	PST1	multi-core-promoter	NA	constitutive,inducible,constitutive,inducible	DSA,Gal,NaCl
YDR056C	EMC10	single-core-promoter	NA	constitutive	NA
YDR057W	YOS9	multi-core-promoter	NA	constitutive,inducible,inducible	NA
YDR058C	TGL2	single-core-promoter	NA	constitutive	NA
YDR059C	UBC5	single-core-promoter	NA	constitutive	NA
YDR060W	MAK21	multi-core-promoter	NA	constitutive,constitutive,inducible,inducible	Arrest,DD,DSA,Gal,Glc,HS,NaCl
YDR061W	NA	multi-core-promoter	NA	constitutive,inducible	NaCl
YDR062W	LCB2	multi-core-promoter	NA	constitutive,inducible	DSA,Glc,H2O2,HS
YDR063W	AIM7	multi-core-promoter	NA	constitutive,inducible	Glc,H2O2,HS,NaCl
YDR064W	RPS13	single-core-promoter	NA	constitutive	NA
YDR065W	RRG1	single-core-promoter	NA	constitutive	NA
YDR066C	RTR2	single-core-promoter	NA	constitutive	NA
YDR067C	OCA6	multi-core-promoter	NA	constitutive,inducible	Gal
YDR068W	DOS2	multi-core-promoter	NA	constitutive,inducible	HS
YDR069C	DOA4	single-core-promoter	NA	constitutive	NA
YDR070C	FMP16	single-core-promoter	NA	constitutive	NA
YDR071C	PAA1	single-core-promoter	NA	constitutive	NA
YDR072C	IPT1	multi-core-promoter	NA	constitutive,inducible	HS,NaCl
YDR073W	SNF11	multi-core-promoter	NA	constitutive,inducible,constitutive,inducible	DSA,H2O2,NaCl
YDR074W	TPS2	multi-core-promoter	NA	constitutive,inducible	NA
YDR075W	PPH3	multi-core-promoter	NA	constitutive,inducible	Gal,Glc
YDR076W	RAD55	single-core-promoter	NA	constitutive	NA
YDR077W	SED1	multi-core-promoter	NA	constitutive,inducible,inducible,inducible	Arrest,DD,DSA,Gal,Glc,H2O2,HS
YDR078C	SHU2	multi-core-promoter	NA	constitutive,inducible,inducible,inducible	Glc,NaCl
YDR079C-A	TFB5	multi-core-promoter	NA	constitutive,inducible,inducible	DSA,HS,NaCl
YDR079W	PET100	multi-core-promoter	NA	constitutive,inducible,constitutive	DSA,Gal,Glc,HS,NaCl
YDR080W	VPS41	multi-core-promoter	NA	constitutive,inducible,inducible	Arrest,DD,DSA,Glc,HS
YDR081C	PDC2	single-core-promoter	NA	constitutive	NA
YDR082W	STN1	single-core-promoter	NA	constitutive	NA
YDR083W	RRP8	multi-core-promoter	NA	constitutive,inducible	DSA,Gal,Glc,HS,NaCl
YDR084C	TVP23	single-core-promoter	NA	constitutive	NA
YDR085C	AFR1	multi-core-promoter	NA	constitutive,constitutive	Arrest,DSA,Gal,Glc
YDR086C	SSS1	single-core-promoter	NA	constitutive	NA
YDR087C	RRP1	single-core-promoter	NA	constitutive	NA
YDR088C	SLU7	multi-core-promoter	NA	constitutive,constitutive	DSA
YDR089W	VTC5	multi-core-promoter	NA	constitutive,inducible,constitutive	Arrest,DD,DSA,Gal,Glc,H2O2,HS
YDR090C	NA	multi-core-promoter	NA	constitutive,inducible	HS
YDR091C	RLI1	multi-core-promoter	NA	constitutive,inducible	DD,DSA,Gal,HS,NaCl
YDR092W	UBC13	multi-core-promoter	NA	constitutive,inducible	HS
YDR093W	DNF2	multi-core-promoter	NA	inducible,constitutive,constitutive	NA
YDR094W	NA	single-core-promoter	NA	inducible	NA
YDR095C	NA	single-core-promoter	NA	inducible	NA
YDR096W	GIS1	single-core-promoter	NA	constitutive	NA
YDR097C	MSH6	single-core-promoter	NA	constitutive	NA
YDR098C	GRX3	multi-core-promoter	NA	constitutive,inducible	Arrest
YDR099W	BMH2	multi-core-promoter	NA	constitutive,constitutive,inducible,inducible,constitutive,inducible	DD,DSA,Glc,H2O2,HS,NaCl
YDR100W	TVP15	single-core-promoter	NA	constitutive	NA
YDR101C	ARX1	single-core-promoter	NA	constitutive	NA
YDR102C	NA	multi-core-promoter	NA	inducible,inducible	NA
YDR103W	STE5	multi-core-promoter	NA	constitutive,inducible,constitutive	Gal,NaCl
YDR104C	SPO71	single-core-promoter	NA	constitutive	NA
YDR105C	TMS1	multi-core-promoter	NA	constitutive,inducible,inducible,inducible	HS,NaCl
YDR106W	ARP10	single-core-promoter	NA	constitutive	NA
YDR107C	TMN2	single-core-promoter	NA	constitutive	NA
YDR108W	TRS85	single-core-promoter	NA	constitutive	NA
YDR109C	putative%20phosphotransferase	multi-core-promoter	II	constitutive,inducible,inducible	Arrest,DD,DSA,Gal,Glc,H2O2,HS,NaCl
YDR110W	FOB1	multi-core-promoter	NA	constitutive,inducible	NA
YDR111C	ALT2	multi-core-promoter	NA	constitutive,constitutive	Gal,Glc,HS,NaCl
YDR113C	PDS1	multi-core-promoter	NA	constitutive,inducible	DD,Gal,H2O2,NaCl
YDR114C	NA	single-core-promoter	NA	inducible	NA
YDR115W	MRX14	multi-core-promoter	NA	constitutive,constitutive	Gal,Glc,HS
YDR116C	MRPL1	single-core-promoter	NA	constitutive	NA
YDR117C	TMA64	single-core-promoter	NA	constitutive	NA
YDR118W	APC4	single-core-promoter	NA	constitutive	NA
YDR119W	VBA4	multi-core-promoter	NA	constitutive,constitutive	Glc,HS
YDR119W-A	COX26	multi-core-promoter	NA	constitutive,inducible	Arrest,Gal
YDR120C	TRM1	multi-core-promoter	II	constitutive,inducible,inducible	Glc,NaCl
YDR121W	DPB4	single-core-promoter	NA	constitutive	NA
YDR122W	KIN1	multi-core-promoter	NA	constitutive,constitutive	HS
YDR123C	INO2	multi-core-promoter	NA	constitutive,inducible,inducible,inducible	Arrest
YDR124W	NA	multi-core-promoter	NA	constitutive,inducible,constitutive	Arrest,DSA,H2O2
YDR125C	ECM18	multi-core-promoter	II	constitutive,inducible,inducible	Arrest,DSA
YDR126W	SWF1	multi-core-promoter	NA	constitutive,inducible,inducible	Arrest,DD,Gal,Glc,NaCl
YDR127W	ARO1	single-core-promoter	NA	constitutive	NA
YDR128W	MTC5	single-core-promoter	NA	constitutive	NA
YDR129C	SAC6	multi-core-promoter	NA	constitutive,inducible	NaCl
YDR130C	FIN1	single-core-promoter	NA	constitutive	NA
YDR131C	NA	single-core-promoter	NA	constitutive	NA
YDR132C	NA	single-core-promoter	NA	constitutive	NA
YDR135C	YCF1	multi-core-promoter	NA	constitutive,inducible	DSA,Gal,NaCl
YDR137W	RGP1	multi-core-promoter	NA	constitutive,constitutive,inducible	DD,DSA,H2O2,HS
YDR138W	HPR1	single-core-promoter	NA	constitutive	NA
YDR139C	RUB1	multi-core-promoter	NA	constitutive,inducible	Glc,H2O2
YDR140W	MTQ2	multi-core-promoter	NA	constitutive,inducible,inducible	Arrest
YDR141C	DOP1	single-core-promoter	NA	constitutive	NA
YDR142C	PEX7	single-core-promoter	NA	constitutive	NA
YDR143C	SAN1	single-core-promoter	NA	constitutive	NA
YDR144C	MKC7	multi-core-promoter	NA	constitutive,inducible	DSA,Gal,HS
YDR145W	TAF12	multi-core-promoter	NA	constitutive,constitutive	Arrest,Glc,HS
YDR146C	SWI5	multi-core-promoter	NA	constitutive,inducible	Arrest,HS
YDR147W	EKI1	multi-core-promoter	NA	constitutive,inducible,constitutive	DSA
YDR148C	KGD2	single-core-promoter	NA	constitutive	NA
YDR150W	NUM1	multi-core-promoter	NA	constitutive,inducible,constitutive,inducible	Gal,H2O2
YDR151C	CTH1	single-core-promoter	NA	constitutive	NA
YDR152W	GIR2	multi-core-promoter	NA	constitutive,inducible,inducible,inducible,inducible	Arrest,DD,Glc,H2O2,HS,NaCl
YDR153C	ENT5	multi-core-promoter	NA	constitutive,inducible	Glc,HS
YDR155C	CPR1	multi-core-promoter	NA	constitutive,inducible	Arrest,DD,DSA,Glc,HS
YDR156W	RPA14	multi-core-promoter	NA	constitutive,inducible,constitutive	Arrest,DSA,Gal,Glc,HS,NaCl
YDR157W	NA	single-core-promoter	NA	inducible	NA
YDR158W	HOM2	single-core-promoter	NA	constitutive	NA
YDR159W	SAC3	single-core-promoter	NA	constitutive	NA
YDR160W	SSY1	single-core-promoter	NA	constitutive	NA
YDR161W	ACL4	single-core-promoter	NA	constitutive	NA
YDR162C	NBP2	multi-core-promoter	NA	constitutive,constitutive,inducible	NaCl
YDR163W	CWC15	multi-core-promoter	NA	constitutive,inducible,inducible	Glc
YDR164C	SEC1	multi-core-promoter	NA	constitutive,inducible	Gal,Glc
YDR165W	TRM82	multi-core-promoter	NA	constitutive,inducible	DSA,HS
YDR166C	SEC5	multi-core-promoter	NA	constitutive,inducible	HS,NaCl
YDR167W	TAF10	single-core-promoter	NA	constitutive	NA
YDR168W	CDC37	single-core-promoter	NA	constitutive	NA
YDR169C	STB3	multi-core-promoter	NA	constitutive,constitutive	HS
YDR169C-A	NA	multi-core-promoter	NA	inducible,inducible	NA
YDR170C	SEC7	single-core-promoter	NA	constitutive	NA
YDR171W	HSP42	multi-core-promoter	NA	constitutive,inducible	Glc
YDR172W	SUP35	single-core-promoter	NA	constitutive	NA
YDR173C	ARG82	multi-core-promoter	NA	constitutive,inducible	HS
YDR174W	HMO1	multi-core-promoter	NA	constitutive,inducible	NaCl
YDR175C	RSM24	multi-core-promoter	NA	constitutive,inducible	DSA,HS
YDR176W	NGG1	multi-core-promoter	NA	constitutive,inducible,inducible	NA
YDR177W	UBC1	single-core-promoter	NA	constitutive	NA
YDR178W	SDH4	single-core-promoter	NA	constitutive	NA
YDR179C	CSN9	single-core-promoter	NA	constitutive	NA
YDR179W-A	NVJ3	single-core-promoter	NA	constitutive	NA
YDR180W	SCC2	multi-core-promoter	NA	inducible,constitutive	NA
YDR181C	SAS4	single-core-promoter	NA	constitutive	NA
YDR182W	CDC1	single-core-promoter	NA	constitutive	NA
YDR182W-A	NA	multi-core-promoter	NA	inducible,constitutive	NA
YDR183C-A	NA	single-core-promoter	NA	inducible	NA
YDR183W	PLP1	single-core-promoter	NA	constitutive	NA
YDR184C	ATC1	single-core-promoter	NA	constitutive	NA
YDR185C	UPS3	single-core-promoter	NA	constitutive	NA
YDR186C	NA	multi-core-promoter	NA	constitutive,constitutive,inducible	DD,DSA,Gal,Glc,H2O2,HS,NaCl
YDR188W	CCT6	multi-core-promoter	NA	constitutive,inducible,constitutive,constitutive,inducible	DSA,Gal
YDR189W	SLY1	multi-core-promoter	NA	constitutive,inducible	DSA,Gal,Glc,HS
YDR190C	RVB1	single-core-promoter	NA	constitutive	NA
YDR191W	HST4	single-core-promoter	NA	constitutive	NA
YDR192C	NUP42	multi-core-promoter	NA	constitutive,inducible	NA
YDR194C	MSS116	multi-core-promoter	NA	constitutive,inducible	Gal
YDR195W	REF2	multi-core-promoter	NA	constitutive,constitutive	Arrest,DD,DSA,Gal,Glc,H2O2,HS,NaCl
YDR196C	CAB5	single-core-promoter	NA	constitutive	NA
YDR197W	CBS2	single-core-promoter	NA	constitutive	NA
YDR198C	RKM2	single-core-promoter	NA	constitutive	NA
YDR200C	VPS64	single-core-promoter	NA	constitutive	NA
YDR201W	SPC19	multi-core-promoter	NA	constitutive,inducible	DSA,Gal,HS
YDR202C	RAV2	single-core-promoter	NA	constitutive	NA
YDR204W	COQ4	multi-core-promoter	NA	constitutive,inducible	HS
YDR205W	MSC2	multi-core-promoter	NA	constitutive,inducible,inducible	Gal
YDR206W	EBS1	single-core-promoter	NA	constitutive	NA
YDR207C	UME6	multi-core-promoter	NA	constitutive,inducible,inducible	NaCl
YDR208W	MSS4	single-core-promoter	NA	constitutive	NA
YDR210W	NA	multi-core-promoter	NA	constitutive,inducible	Arrest,DSA,Gal,Glc
YDR211W	GCD6	multi-core-promoter	NA	constitutive,inducible	DSA,HS
YDR212W	TCP1	single-core-promoter	NA	constitutive	NA
YDR213W	UPC2	multi-core-promoter	NA	constitutive,constitutive,inducible	Glc
YDR214W	AHA1	single-core-promoter	NA	constitutive	NA
YDR215C	NA	multi-core-promoter	NA	inducible,inducible,inducible	NA
YDR216W	ADR1	multi-core-promoter	NA	constitutive,constitutive	DD,DSA,Gal,H2O2,HS
YDR217C	RAD9	multi-core-promoter	NA	constitutive,inducible	DSA
YDR219C	MFB1	single-core-promoter	NA	constitutive	NA
YDR221W	GTB1	single-core-promoter	I	constitutive	NA
YDR222W	NA	multi-core-promoter	NA	inducible,inducible	Arrest,Gal,Glc,H2O2,HS,NaCl
YDR223W	CRF1	multi-core-promoter	NA	inducible,constitutive	Arrest,Glc,H2O2,NaCl
YDR224C	HTB1	single-core-promoter	NA	constitutive	NA
YDR225W	HTA1	single-core-promoter	NA	constitutive	NA
YDR226W	ADK1	multi-core-promoter	NA	constitutive,inducible	NA
YDR227W	SIR4	single-core-promoter	NA	constitutive	NA
YDR228C	PCF11	multi-core-promoter	NA	constitutive,inducible,constitutive,inducible	H2O2,HS,NaCl
YDR229W	IVY1	multi-core-promoter	NA	constitutive,inducible	DSA
YDR230W	NA	multi-core-promoter	NA	inducible,inducible	NA
YDR231C	COX20	multi-core-promoter	NA	constitutive,inducible,inducible,inducible	Gal,Glc,HS,NaCl
YDR232W	HEM1	multi-core-promoter	NA	constitutive,constitutive,inducible	DD,Glc,HS
YDR233C	RTN1	multi-core-promoter	NA	constitutive,constitutive,inducible	DSA,HS,NaCl
YDR234W	LYS4	multi-core-promoter	NA	constitutive,inducible,inducible,constitutive,constitutive	Gal
YDR235W	PRP42	multi-core-promoter	NA	constitutive,inducible	DSA,Glc,NaCl
YDR236C	FMN1	multi-core-promoter	NA	constitutive,constitutive	DSA,Gal,HS
YDR237W	MRPL7	multi-core-promoter	NA	constitutive,inducible	Glc,HS
YDR238C	SEC26	multi-core-promoter	NA	constitutive,inducible	Arrest,DSA,HS
YDR239C	NA	single-core-promoter	NA	constitutive	NA
YDR240C	SNU56	multi-core-promoter	NA	constitutive,inducible,inducible,inducible,inducible,inducible	Arrest
YDR241W	BUD26	single-core-promoter	NA	inducible	NA
YDR242W	AMD2	multi-core-promoter	NA	constitutive,inducible,inducible	DSA,Glc,HS
YDR243C	PRP28	multi-core-promoter	NA	constitutive,inducible	NA
YDR244W	PEX5	single-core-promoter	NA	constitutive	NA
YDR245W	MNN10	single-core-promoter	NA	constitutive	NA
YDR246W	TRS23	single-core-promoter	NA	constitutive	NA
YDR246W-A	NA	multi-core-promoter	NA	inducible,inducible,inducible	NA
YDR247W	VHS1	multi-core-promoter	NA	constitutive,inducible	Arrest,Gal,Glc
YDR248C	gluconokinase	single-core-promoter	NA	constitutive	NA
YDR249C	NA	single-core-promoter	NA	constitutive	NA
YDR250C	NA	multi-core-promoter	NA	inducible,inducible,inducible	NA
YDR251W	PAM1	multi-core-promoter	NA	inducible,constitutive	Arrest
YDR252W	BTT1	single-core-promoter	NA	constitutive	NA
YDR253C	MET32	single-core-promoter	NA	constitutive	NA
YDR254W	CHL4	multi-core-promoter	NA	constitutive,inducible	NA
YDR255C	RMD5	single-core-promoter	NA	constitutive	NA
YDR256C	CTA1	multi-core-promoter	NA	constitutive,inducible	HS
YDR257C	RKM4	multi-core-promoter	NA	constitutive,inducible	DSA,Glc,HS,NaCl
YDR258C	HSP78	multi-core-promoter	NA	constitutive,inducible	NA
YDR259C	YAP6	multi-core-promoter	NA	inducible,inducible,constitutive,inducible	DD
YDR260C	SWM1	single-core-promoter	NA	constitutive	NA
YDR261C	EXG2	single-core-promoter	NA	constitutive	NA
YDR262W	NA	multi-core-promoter	NA	constitutive,inducible	Arrest,DSA
YDR263C	DIN7	single-core-promoter	NA	constitutive	NA
YDR264C	AKR1	multi-core-promoter	NA	constitutive,inducible,inducible	DSA
YDR265W	PEX10	single-core-promoter	NA	constitutive	NA
YDR266C	HEL2	single-core-promoter	NA	constitutive	NA
YDR267C	CIA1	multi-core-promoter	NA	constitutive,inducible	Arrest,DD,DSA,Glc
YDR268W	MSW1	multi-core-promoter	NA	constitutive,inducible	NA
YDR270W	CCC2	single-core-promoter	NA	constitutive	NA
YDR272W	GLO2	multi-core-promoter	NA	constitutive,inducible	DSA
YDR273W	DON1	multi-core-promoter	NA	constitutive,inducible,inducible	HS,NaCl
YDR275W	BSC2	multi-core-promoter	NA	constitutive,constitutive,constitutive	Arrest,DD,HS,NaCl
YDR276C	PMP3	multi-core-promoter	NA	constitutive,inducible,inducible	DD,Gal,H2O2
YDR277C	MTH1	multi-core-promoter	NA	constitutive,inducible	NA
YDR279W	RNH202	multi-core-promoter	NA	constitutive,inducible	DSA,HS
YDR280W	RRP45	single-core-promoter	NA	constitutive	NA
YDR281C	PHM6	multi-core-promoter	NA	constitutive,inducible,inducible	Arrest,Glc
YDR282C	MRX10	multi-core-promoter	NA	constitutive,inducible	NA
YDR283C	GCN2	single-core-promoter	III	constitutive	NA
YDR284C	DPP1	single-core-promoter	NA	constitutive	NA
YDR285W	ZIP1	multi-core-promoter	NA	constitutive,inducible,inducible,inducible	DSA,Gal
YDR286C	NA	multi-core-promoter	NA	constitutive,constitutive	DD,DSA,Gal,Glc,NaCl
YDR287W	INM2	multi-core-promoter	NA	constitutive,inducible,inducible	NA
YDR288W	NSE3	multi-core-promoter	NA	constitutive,inducible	DD,DSA,Gal,H2O2,HS
YDR289C	RTT103	single-core-promoter	NA	constitutive	NA
YDR291W	HRQ1	multi-core-promoter	I	inducible,constitutive	DSA,Gal,Glc
YDR292C	SRP101	multi-core-promoter	NA	constitutive,inducible	DSA,Glc
YDR293C	SSD1	multi-core-promoter	NA	constitutive,inducible,inducible,constitutive,constitutive	Arrest,Glc,HS
YDR294C	DPL1	single-core-promoter	NA	constitutive	NA
YDR295C	HDA2	single-core-promoter	NA	constitutive	NA
YDR296W	MHR1	multi-core-promoter	NA	constitutive,inducible	HS
YDR297W	SUR2	multi-core-promoter	NA	constitutive,constitutive,inducible	Arrest,DSA,H2O2,NaCl
YDR298C	ATP5	multi-core-promoter	NA	constitutive,inducible	NA
YDR299W	BFR2	multi-core-promoter	NA	constitutive,inducible	HS
YDR300C	PRO1	single-core-promoter	NA	constitutive	NA
YDR301W	CFT1	multi-core-promoter	NA	constitutive,inducible	Gal
YDR302W	GPI11	single-core-promoter	NA	constitutive	NA
YDR303C	RSC3	multi-core-promoter	NA	inducible,constitutive,inducible,constitutive	Gal,H2O2
YDR304C	CPR5	multi-core-promoter	NA	constitutive,inducible,inducible	Glc,H2O2
YDR305C	HNT2	single-core-promoter	I	constitutive	NA
YDR306C	NA	multi-core-promoter	NA	constitutive,inducible,inducible	Gal
YDR307W	PMT7	multi-core-promoter	NA	constitutive,inducible,inducible	Gal,HS,NaCl
YDR308C	SRB7	multi-core-promoter	NA	constitutive,inducible	DSA
YDR309C	GIC2	multi-core-promoter	NA	constitutive,inducible	NA
YDR310C	SUM1	multi-core-promoter	NA	inducible,constitutive,constitutive,inducible	DD,Glc,H2O2,HS
YDR311W	TFB1	single-core-promoter	NA	constitutive	NA
YDR312W	SSF2	multi-core-promoter	NA	constitutive,inducible	Arrest
YDR313C	PIB1	single-core-promoter	NA	constitutive	NA
YDR314C	RAD34	single-core-promoter	NA	constitutive	NA
YDR315C	IPK1	single-core-promoter	NA	constitutive	NA
YDR316W	OMS1	single-core-promoter	NA	constitutive	NA
YDR317W	HIM1	single-core-promoter	NA	constitutive	NA
YDR318W	MCM21	single-core-promoter	NA	constitutive	NA
YDR319C	YFT2	single-core-promoter	NA	constitutive	NA
YDR320C	SWA2	single-core-promoter	NA	constitutive	NA
YDR320C-A	DAD4	single-core-promoter	NA	constitutive	NA
YDR320W-B	NA	multi-core-promoter	NA	constitutive,inducible	NaCl
YDR321W	ASP1	single-core-promoter	NA	constitutive	NA
YDR322C-A	TIM11	multi-core-promoter	NA	constitutive,constitutive	DSA,Gal,HS
YDR322W	MRPL35	single-core-promoter	NA	constitutive	NA
YDR323C	PEP7	single-core-promoter	NA	constitutive	NA
YDR324C	UTP4	single-core-promoter	I	constitutive	NA
YDR325W	YCG1	multi-core-promoter	NA	constitutive,inducible	NA
YDR326C	YSP2	multi-core-promoter	NA	constitutive,inducible	NA
YDR328C	SKP1	single-core-promoter	NA	constitutive	NA
YDR329C	PEX3	single-core-promoter	NA	constitutive	NA
YDR330W	UBX5	single-core-promoter	NA	constitutive	NA
YDR331W	GPI8	multi-core-promoter	NA	constitutive,inducible	DD,NaCl
YDR332W	IRC3	single-core-promoter	NA	constitutive	NA
YDR333C	RQC1	multi-core-promoter	NA	constitutive,inducible	HS
YDR334W	SWR1	multi-core-promoter	NA	constitutive,constitutive	DD,DSA,H2O2
YDR335W	MSN5	multi-core-promoter	NA	constitutive,constitutive	DD,DSA,Glc,H2O2,HS
YDR336W	MRX8	single-core-promoter	III	constitutive	NA
YDR337W	MRPS28	single-core-promoter	NA	constitutive	NA
YDR338C	NA	multi-core-promoter	NA	constitutive,constitutive,inducible	NA
YDR339C	FCF1	multi-core-promoter	NA	constitutive,inducible	DD,NaCl
YDR341C	ArgRS,RRS1,arginine--tRNA%20ligase	single-core-promoter	NA	constitutive	NA
YDR342C	HXT7	multi-core-promoter	NA	constitutive,inducible,inducible	Arrest,DD,DSA,Gal,HS,NaCl
YDR343C	HXT6	multi-core-promoter	NA	inducible,constitutive,inducible,inducible	DD,DSA,Gal,H2O2,HS,NaCl
YDR344C	NA	multi-core-promoter	NA	inducible,constitutive,inducible	Gal,H2O2,HS
YDR345C	HXT3	multi-core-promoter	NA	constitutive,inducible,inducible,inducible	Arrest,DSA,Gal,Glc,H2O2,HS
YDR346C	SVF1	single-core-promoter	NA	constitutive	NA
YDR347W	MRP1	multi-core-promoter	NA	constitutive,inducible	HS
YDR348C	PAL1	multi-core-promoter	NA	inducible,constitutive	NA
YDR349C	YPS7	multi-core-promoter	NA	constitutive,inducible,inducible	Arrest,Glc,HS,NaCl
YDR350C	ATP22	single-core-promoter	NA	constitutive	NA
YDR351W	SBE2	single-core-promoter	NA	constitutive	NA
YDR352W	YPQ2	single-core-promoter	NA	constitutive	NA
YDR353W	TRR1	single-core-promoter	NA	constitutive	NA
YDR354W	TRP4	single-core-promoter	NA	constitutive	NA
YDR356W	SPC110	single-core-promoter	NA	constitutive	NA
YDR357C	CNL1	multi-core-promoter	NA	constitutive,inducible,inducible	DSA,Gal,Glc,HS,NaCl
YDR358W	GGA1	multi-core-promoter	NA	constitutive,inducible	DD,DSA,Gal,Glc,H2O2,HS
YDR359C	EAF1	single-core-promoter	NA	constitutive	NA
YDR361C	BCP1	single-core-promoter	NA	constitutive	NA
YDR362C	TFC6	multi-core-promoter	NA	constitutive,inducible	DSA,HS
YDR363W	ESC2	multi-core-promoter	NA	constitutive,inducible	NA
YDR363W-A	SEM1	single-core-promoter	NA	constitutive	NA
YDR364C	CDC40	single-core-promoter	NA	constitutive	NA
YDR365C	ESF1	multi-core-promoter	NA	constitutive,constitutive	Arrest,DD,DSA,Gal,Glc,H2O2,HS,NaCl
YDR366C	NA	multi-core-promoter	NA	inducible,constitutive,inducible	Gal,NaCl
YDR367W	KEI1	single-core-promoter	NA	constitutive	NA
YDR368W	YPR1	single-core-promoter	NA	constitutive	NA
YDR369C	XRS2	single-core-promoter	NA	constitutive	NA
YDR370C	DXO1	single-core-promoter	NA	constitutive	NA
YDR371C-A	NA	single-core-promoter	NA	inducible	NA
YDR371W	CTS2	multi-core-promoter	NA	constitutive,inducible,inducible	Glc
YDR372C	VPS74	single-core-promoter	NA	constitutive	NA
YDR373W	FRQ1	multi-core-promoter	NA	constitutive,inducible	DD,Glc,HS
YDR374C	PHO92	single-core-promoter	NA	inducible	NA
YDR374W-A	WIP1	multi-core-promoter	NA	constitutive,inducible	HS
YDR375C	BCS1	multi-core-promoter	NA	constitutive,inducible,inducible	DSA,Gal,HS
YDR376W	ARH1	multi-core-promoter	NA	constitutive,inducible	DSA,HS,NaCl
YDR377W	ATP17	multi-core-promoter	NA	constitutive,inducible	DD,DSA,Gal,Glc,H2O2,HS
YDR378C	LSM6	multi-core-promoter	NA	constitutive,inducible,constitutive,inducible	Arrest,DD,DSA,Gal,H2O2,HS,NaCl
YDR379C-A	SDH6	multi-core-promoter	NA	constitutive,inducible	HS
YDR379W	RGA2	multi-core-promoter	NA	constitutive,inducible	Glc
YDR380W	ARO10	multi-core-promoter	NA	constitutive,inducible,inducible	Arrest,DD,DSA,Gal,Glc,H2O2,HS,NaCl
YDR381C-A	NA	single-core-promoter	NA	constitutive	NA
YDR381W	YRA1	single-core-promoter	NA	constitutive	NA
YDR382W	RPP2B	multi-core-promoter	NA	constitutive,inducible,inducible	Arrest,DD,DSA,Gal,H2O2,HS,NaCl
YDR383C	NKP1	single-core-promoter	NA	constitutive	NA
YDR384C	ATO3	multi-core-promoter	NA	constitutive,inducible,inducible,inducible	Gal,HS
YDR385W	EFT2	multi-core-promoter	NA	constitutive,inducible,inducible	DSA,Gal,H2O2,HS,NaCl
YDR386W	MUS81	single-core-promoter	NA	constitutive	NA
YDR387C	CIN10	single-core-promoter	NA	constitutive	NA
YDR388W	RVS167	multi-core-promoter	NA	constitutive,inducible,inducible	DSA,HS
YDR389W	SAC7	multi-core-promoter	NA	constitutive,constitutive	Arrest,DD,DSA,Gal,Glc,H2O2,HS,NaCl
YDR390C	UBA2	single-core-promoter	NA	constitutive	NA
YDR391C	NA	multi-core-promoter	NA	constitutive,constitutive,inducible	DSA
YDR392W	SPT3	multi-core-promoter	NA	constitutive,inducible,constitutive	DSA,H2O2,HS,NaCl
YDR393W	SHE9	single-core-promoter	NA	constitutive	NA
YDR394W	RPT3	single-core-promoter	NA	constitutive	NA
YDR395W	SXM1	single-core-promoter	NA	constitutive	NA
YDR396W	NA	single-core-promoter	NA	inducible	NA
YDR397C	NCB2	multi-core-promoter	NA	constitutive,inducible	DSA,HS,NaCl
YDR398W	UTP5	multi-core-promoter	NA	constitutive,constitutive	DD,DSA,H2O2
YDR399W	HPT1	multi-core-promoter	NA	constitutive,inducible	Arrest,DSA,Gal,HS,NaCl
YDR400W	URH1	single-core-promoter	NA	constitutive	NA
YDR403W	DIT1	multi-core-promoter	NA	inducible,inducible,inducible	NA
YDR404C	RPB7	multi-core-promoter	NA	inducible,constitutive,inducible	Glc,HS
YDR405W	MRP20	multi-core-promoter	NA	constitutive,inducible,inducible	NA
YDR406W	PDR15	multi-core-promoter	NA	constitutive,inducible,inducible	DSA,Gal,HS
YDR406W-A	YDR406C-A	multi-core-promoter	NA	inducible,inducible	NA
YDR407C	TRS120	single-core-promoter	NA	constitutive	NA
YDR408C	ADE8	multi-core-promoter	NA	constitutive,constitutive	DSA,Gal,HS,NaCl
YDR409W	SIZ1	multi-core-promoter	NA	constitutive,inducible	NA
YDR410C	STE14	single-core-promoter	NA	constitutive	NA
YDR411C	DFM1	single-core-promoter	NA	constitutive	NA
YDR412W	RRP17	single-core-promoter	NA	constitutive	NA
YDR413C	NA	single-core-promoter	NA	constitutive	NA
YDR414C	ERD1	single-core-promoter	NA	constitutive	NA
YDR415C	putative%20aminopeptidase	multi-core-promoter	NA	constitutive,inducible	HS,NaCl
YDR416W	SYF1	multi-core-promoter	NA	constitutive,inducible	NA
YDR417C	NA	multi-core-promoter	NA	inducible,constitutive	NA
YDR418W	RPL12B	multi-core-promoter	NA	constitutive,inducible,inducible	Arrest,DSA,Gal,HS,NaCl
YDR419W	RAD30	multi-core-promoter	NA	constitutive,inducible	HS
YDR420W	HKR1	multi-core-promoter	NA	constitutive,constitutive	DD,DSA,Gal,Glc
YDR421W	ARO80	single-core-promoter	NA	constitutive	NA
YDR422C	SIP1	single-core-promoter	NA	constitutive	NA
YDR423C	CAD1	multi-core-promoter	II	constitutive,inducible	NA
YDR424C	DYN2	single-core-promoter	NA	constitutive	NA
YDR425W	SNX41	multi-core-promoter	NA	constitutive,inducible,constitutive	Arrest,DD,DSA,Gal,Glc,H2O2,HS,NaCl
YDR427W	RPN9	multi-core-promoter	NA	constitutive,inducible	DD,DSA,Gal,HS
YDR428C	BNA7	multi-core-promoter	NA	constitutive,inducible	DD,DSA,Glc,HS
YDR429C	TIF35	single-core-promoter	NA	constitutive	NA
YDR430C	CYM1	single-core-promoter	NA	constitutive	NA
YDR431W	NA	single-core-promoter	NA	inducible	NA
YDR432W	NPL3	single-core-promoter	NA	constitutive	NA
YDR433W	KRE22	multi-core-promoter	NA	inducible,inducible	NA
YDR434W	GPI17	multi-core-promoter	NA	constitutive,inducible	Glc,HS
YDR435C	PPM1	multi-core-promoter	NA	constitutive,constitutive,inducible,inducible,inducible	NA
YDR436W	PPZ2	multi-core-promoter	NA	constitutive,inducible,constitutive	DD,DSA,Glc,H2O2,HS
YDR437W	GPI19	single-core-promoter	NA	constitutive	NA
YDR438W	THI74	multi-core-promoter	NA	inducible,inducible	NA
YDR439W	LRS4	multi-core-promoter	NA	constitutive,inducible	Gal,Glc
YDR440W	DOT1	single-core-promoter	NA	constitutive	NA
YDR441C	APT2	single-core-promoter	NA	constitutive	NA
YDR442W	NA	single-core-promoter	NA	inducible	NA
YDR443C	SSN2	multi-core-promoter	NA	constitutive,inducible	NA
YDR444W	putative%20hydrolase	single-core-promoter	NA	constitutive	NA
YDR445C	NA	single-core-promoter	NA	constitutive	NA
YDR446W	ECM11	multi-core-promoter	NA	inducible,inducible	NA
YDR447C	RPS17B	single-core-promoter	NA	constitutive	NA
YDR448W	ADA2	single-core-promoter	NA	constitutive	NA
YDR449C	UTP6	multi-core-promoter	NA	constitutive,inducible	NA
YDR450W	RPS18A	multi-core-promoter	NA	constitutive,inducible	Gal,NaCl
YDR451C	YHP1	single-core-promoter	NA	constitutive	NA
YDR452W	PPN1	multi-core-promoter	NA	constitutive,inducible	HS
YDR453C	TSA2	multi-core-promoter	NA	constitutive,inducible	Gal,H2O2,HS
YDR454C	GUK1	single-core-promoter	NA	constitutive	NA
YDR455C	NA	multi-core-promoter	NA	inducible,inducible	NA
YDR456W	NHX1	multi-core-promoter	NA	constitutive,inducible,constitutive	DD,DSA,H2O2,HS
YDR457W	TOM1	single-core-promoter	NA	constitutive	NA
YDR458C	HEH2	single-core-promoter	NA	constitutive	NA
YDR459C	PFA5	multi-core-promoter	NA	constitutive,inducible,inducible,inducible	Arrest,HS
YDR460W	TFB3	single-core-promoter	NA	constitutive	NA
YDR461C-A	NA	multi-core-promoter	NA	constitutive,inducible	DSA,Gal,Glc,H2O2,HS
YDR461W	MFA1	multi-core-promoter	NA	constitutive,inducible	NaCl
YDR462W	MRPL28	multi-core-promoter	NA	constitutive,inducible,inducible,inducible	Arrest,DSA,Gal,NaCl
YDR463W	STP1	multi-core-promoter	NA	constitutive,inducible,inducible	HS
YDR464W	SPP41	multi-core-promoter	NA	constitutive,constitutive	DD,Glc,HS,NaCl
YDR465C	RMT2	multi-core-promoter	NA	constitutive,inducible	Arrest,DSA,Gal,HS,NaCl
YDR466W	PKH3	multi-core-promoter	NA	constitutive,inducible	NA
YDR467C	NA	multi-core-promoter	NA	inducible,inducible	NA
YDR468C	TLG1	single-core-promoter	NA	constitutive	NA
YDR469W	SDC1	single-core-promoter	NA	constitutive	NA
YDR470C	UGO1	single-core-promoter	NA	constitutive	NA
YDR471W	RPL27B	single-core-promoter	NA	constitutive	NA
YDR472W	TRS31	single-core-promoter	NA	constitutive	NA
YDR473C	PRP3	multi-core-promoter	NA	constitutive,inducible	NaCl
YDR475C	JIP4	multi-core-promoter	NA	constitutive,inducible	DSA
YDR476C	NA	multi-core-promoter	NA	constitutive,inducible,inducible	NA
YDR477W	SNF1	multi-core-promoter	NA	constitutive,constitutive,inducible,constitutive	Arrest,DD,DSA,Gal,Glc,H2O2,HS
YDR478W	SNM1	single-core-promoter	NA	constitutive	NA
YDR479C	PEX29	single-core-promoter	NA	constitutive	NA
YDR480W	DIG2	multi-core-promoter	NA	constitutive,constitutive,inducible	Arrest,DD,DSA
YDR481C	PHO8	multi-core-promoter	NA	constitutive,constitutive	Arrest
YDR482C	CWC21	multi-core-promoter	NA	constitutive,inducible,inducible	H2O2
YDR483W	KRE2	multi-core-promoter	NA	constitutive,inducible	HS,NaCl
YDR484W	VPS52	single-core-promoter	NA	constitutive	NA
YDR485C	VPS72	multi-core-promoter	NA	constitutive,inducible	NA
YDR486C	VPS60	single-core-promoter	NA	constitutive	NA
YDR487C	RIB3	multi-core-promoter	NA	constitutive,inducible	DD,HS
YDR488C	PAC11	single-core-promoter	I	constitutive	NA
YDR489W	SLD5	single-core-promoter	NA	constitutive	NA
YDR490C	PKH1	multi-core-promoter	NA	constitutive,inducible	Glc,HS,NaCl
YDR491C	NA	multi-core-promoter	NA	inducible,inducible	NA
YDR492W	IZH1	single-core-promoter	NA	constitutive	NA
YDR493W	MZM1	multi-core-promoter	NA	constitutive,inducible	DSA,NaCl
YDR494W	RSM28	single-core-promoter	NA	constitutive	NA
YDR495C	VPS3	single-core-promoter	NA	constitutive	NA
YDR496C	PUF6	single-core-promoter	NA	constitutive	NA
YDR497C	ITR1	multi-core-promoter	NA	constitutive,inducible	DSA,HS
YDR498C	SEC20	multi-core-promoter	NA	constitutive,inducible	DSA,Gal
YDR499W	LCD1	multi-core-promoter	II	inducible,constitutive,inducible	DD
YDR500C	RPL37B	single-core-promoter	NA	constitutive	NA
YDR501W	PLM2	single-core-promoter	NA	inducible	NA
YDR502C	SAM2	single-core-promoter	NA	constitutive	NA
YDR503C	LPP1	single-core-promoter	NA	constitutive	NA
YDR504C	SPG3	single-core-promoter	NA	inducible	NA
YDR505C	PSP1	multi-core-promoter	NA	constitutive,inducible	NA
YDR506C	GMC1	single-core-promoter	NA	constitutive	NA
YDR507C	GIN4	multi-core-promoter	NA	constitutive,inducible	DD
YDR508C	GNP1	multi-core-promoter	NA	constitutive,inducible	Arrest,H2O2,HS
YDR510C-A	NA	multi-core-promoter	NA	inducible,inducible,constitutive,inducible	HS
YDR510W	SMT3	multi-core-promoter	NA	constitutive,inducible,inducible	DSA,Glc,HS,NaCl
YDR511W	SDH7	single-core-promoter	NA	constitutive	NA
YDR512C	EMI1	multi-core-promoter	I	constitutive,constitutive	Arrest,HS
YDR513W	GRX2	multi-core-promoter	NA	constitutive,inducible,inducible	NA
YDR514C	NA	single-core-promoter	NA	constitutive	NA
YDR515W	SLF1	single-core-promoter	NA	constitutive	NA
YDR516C	EMI2	multi-core-promoter	NA	constitutive,inducible,inducible,inducible,constitutive,inducible	Arrest,Gal,NaCl
YDR517W	GRH1	multi-core-promoter	NA	constitutive,constitutive,constitutive,constitutive,inducible	Arrest,DD,Gal
YDR518W	EUG1	multi-core-promoter	NA	constitutive,constitutive	DSA,Gal,NaCl
YDR519W	FPR2	single-core-promoter	NA	constitutive	NA
[truncated: 4,538 more rows]

## Sheet: Data S7
Supplemental Data S7. Ds and FDR values of all multi-core-promoter genes in each treatment.
[truncated: 3,088 more rows]

[truncated: 1 more sheets: Data S8]
